# Supplementary material for: Transcriptomic insights into unisexual flower development in Cannabis sativa: conserved gene networks and perianth identity in male flowers
Source: Research Square preprint supplement (doi:10.21203/rs.3.rs-8078345/v1), 2025-12-04
Supplement: Supplementary file 1 [file 9c44f96f0d4a6349a6fd0772.xlsx]

## Sheet: Table S1
ID (GCF_029168945.1_ASM2916894v1)	Protein accession	Chromosome	Name	vsTAIR	%identity	TAIR desc	TF accession	Average V	Average F1	Average M1	Average F3	Average M3	logFC(F1/V)	pval	padj	logFC(F3/V)	pval	padj	logFC(M1/V)	pval	padj	logFC(M3/V)	pval	padj
gene-LOC115705987	XP_060974856.1	1	probable serine/threonine-protein kinase At1g09600	AT1G53050.2	71.35	Protein kinase superfamily protein		0.119396	0.0798263	0	0.461976	1.16291	0	1	1	0	1	1	0	1	1	0	1	1
gene-LOC115706290	XP_030489745.1	1	mini-chromosome maintenance complex-binding protein	AT2G40550.1	59.03	E2F target protein 1 (ETG1)		52.656	41.4262	53.9879	23.1384	27.0864	-0.354688	0.0329466	0.219596	-1.21238	1.26749e-14	2.45837e-13	0.0241593	0.909963	0.997278	-0.973884	5.61053e-07	2.11419e-06
gene-LOC115707251	XP_030491005.1	1	uncharacterized LOC115707251	AT1G05720.1	77.18	selenoprotein family protein		35.9562	35.7681	43.6667	41.0921	55.4569	-0.00180719	0.991988	0.998352	0.170217	0.343277	0.482937	0.283227	0.216534	0.781215	0.613625	0.00231439	0.00513255
gene-LOC115705027	XP_030488121.1	1	uncharacterized LOC115705027	AT1G71480.1	69.86	Nuclear transport factor 2 (NTF2) family protein		45.1748	47.1474	35.7019	21.7944	13.9589	0.057866	0.757417	0.945243	-1.07991	3.38385e-08	2.97111e-07	-0.347738	0.200383	0.75754	-1.70568	2.48724e-12	1.60615e-11
gene-LOC115705026	XP_030488120.1	1	expansin-A8	AT2G40610.1	81.12	expansin A8		11.2921	17.566	19.8137	6.92749	12.9834	0.624652	0.0146668	0.127014	-0.741396	0.00731656	0.0208585	0.79337	0.00412186	0.074975	0.182635	0.520794	0.610307
gene-LOC115706851	XP_030490468.2	1	bZIP transcription factor 18	AT2G40620.1	58.02	Basic-leucine zipper (bZIP) transcription factor family protein	PK00315.1	25.3465	23.705	23.2249	19.0739	14.117	-0.101526	0.561721	0.883772	-0.435107	0.0105241	0.0286226	-0.134346	0.567419	0.96639	-0.858356	0.000141916	0.000387656
gene-LOC133029966	XP_060958027.1	1	RING-H2 finger protein ATL74-like	AT3G10910.1	59.51	RING/U-box superfamily protein		19.5121	14.8037	17.2486	12.1349	11.7758	-0.406743	0.0198868	0.156254	-0.707901	4.07602e-05	0.000209281	-0.18852	0.387592	0.900158	-0.738274	0.000399814	0.00101822
gene-LOC115706946	XP_030490586.1	1	chalcone isomerase-like protein 2	AT5G05270.2	67.94	Chalcone-flavanone isomerase family protein		92.7709	105.566	106.543	102.139	89.2004	0.179295	0.346398	0.762589	0.107287	0.448006	0.586821	0.186672	0.435054	0.926769	-0.0717191	0.692161	0.762217
gene-LOC115706378	XP_030489870.2	1	U-box domain-containing protein 62	AT5G05230.1	60.67	RING/U-box superfamily protein		16.297	14.0721	17.2463	17.4079	51.7684	-0.208484	0.267346	0.686966	0.0843193	0.623286	0.739411	0.0857829	0.704589	0.980818	1.66157	1.64435e-19	1.71126e-18
gene-LOC115706602	XP_030490170.2	1	uncharacterized LOC115706602	AT3G51580.1	29.69	transmembrane protein		10.1262	8.94968	8.53044	11.6374	13.4682	-0.184763	0.458295	0.829906	0.174788	0.435966	0.575267	-0.255862	0.359078	0.882529	0.399113	0.129843	0.191989
gene-LOC115703642	XP_030486740.2	1	probable LRR receptor-like serine/threonine-protein kinase IRK	AT3G56370.1	71.1	Leucine-rich repeat protein kinase family protein		62.7975	56.5706	61.9575	40.1097	22.5431	-0.159992	0.298906	0.719012	-0.669826	4.84341e-07	3.54567e-06	-0.031854	0.893584	0.996876	-1.49497	8.5499e-15	6.58463e-14
gene-LOC115706199	XP_030489626.1	1	uncharacterized LOC115706199	AT2G40660.1	61.17	Nucleic acid-binding%2C OB-fold-like protein		45.2942	46.0259	44.7248	48.1673	34.9549	0.0152381	0.922584	0.983304	0.0631055	0.650335	0.761193	-0.028184	0.891715	0.996876	-0.386913	0.0409121	0.0695176
gene-LOC115703583	XP_030486668.2	1	uncharacterized protein C6G9.01c	AT5G11760.1	70.73	stress response protein		22.3111	20.1495	23.3555	25.959	27.6888	-0.156161	0.537726	0.871174	0.17974	0.447549	0.586516	0.049566	0.87156	0.996876	0.295462	0.281111	0.36987
gene-LOC133029947	XP_060957935.1	1	uncharacterized LOC133029947					0	0	0	0	0	0	1	1	0	1	1	0	1	1	0	1	1
gene-LOC115708185	XP_060957936.1	1	uncharacterized LOC115708185					0	0	0	0	0	0	1	1	0	1	1	0	1	1	0	1	1
gene-LOC115706609	XP_030490177.1	1	two-component response regulator ARR17	AT3G56380.1	69.93	response regulator 17		8.76481	5.90419	7.51586	4.27426	9.99775	-0.548851	0.095459	0.419372	-0.960253	0.00653808	0.0189141	-0.345606	0.341814	0.874678	0.140341	0.679669	0.751181
gene-LOC115705473	XP_030488671.1	1	glycerol-3-phosphate dehydrogenase [NAD(+)] 2, chloroplastic	AT2G40690.3	80.92	NAD-dependent glycerol-3-phosphate dehydrogenase family protein		4.23143	4.05851	4.10051	3.36144	10.3473	-0.0684901	0.764816	0.947789	-0.355671	0.12481	0.222569	-0.057252	0.836448	0.995797	1.27379	7.27229e-08	3.05958e-07
gene-LOC115705474	XP_030488672.2	1	F-box protein CPR1	AT4G12560.3	28.11	F-box and associated interaction domains-containing protein		13.6597	13.1808	13.3258	18.2559	16.4113	-0.0606715	0.779686	0.950998	0.392436	0.0506255	0.107716	-0.0466616	0.858109	0.99684	0.24929	0.300629	0.390259
gene-LOC115705457	XP_030488655.2	1	uncharacterized LOC115705457	AT1G61670.2	66.47	Lung seven transmembrane receptor family protein		20.5742	23.3678	23.4947	25.1971	21.2953	0.175643	0.335597	0.753241	0.26645	0.0998434	0.186546	0.1793	0.419544	0.918418	0.0346145	0.866518	0.900894
gene-LOC115707214	XP_030490958.2	1	WRKY transcription factor 55	AT2G40740.3	35.29	WRKY DNA-binding protein 55;start_range=.,16997177		0	0	0	0	0.105593	0	1	1	0	1	1	0	1	1	0	1	1
gene-LOC133029949	XP_060957945.1	1	uncharacterized mitochondrial protein AtMg00310-like	AT4G29090.1	38.32	Ribonuclease H-like superfamily protein;start_range=.,14333528		0	0	0	0	0	0	1	1	0	1	1	0	1	1	0	1	1
gene-LOC115707511	XP_030491366.2	1	WRKY DNA-binding transcription factor 70	AT3G56400.1	32.73	WRKY DNA-binding protein 70		3.92451	1.057	30.2163	5.70042	2.77275	-1.79325	0.000127191	0.00326242	0.546095	0.102119	0.189831	2.96887	1.59056e-22	2.6629e-19	-0.476669	0.268046	0.355179
gene-LOC133029950	XP_060957948.1	1	secreted RxLR effector protein 161-like	AT4G23160.3	38.29	cysteine-rich RECEPTOR-like kinase;start_range=.,12131325		0	0	0	0	0	0	1	1	0	1	1	0	1	1	0	1	1
gene-LOC133029953	XP_060957962.1	1	uncharacterized LOC133029953					0	0	0	0	0	0	1	1	0	1	1	0	1	1	0	1	1
gene-LOC115707358	XP_030491153.1	1	rhodanese-like domain-containing protein 7	AT2G40760.1	72.03	Rhodanese/Cell cycle control phosphatase superfamily protein		18.3835	18.4133	20.3922	13.1181	14.5797	-0.00488496	0.97894	0.995865	-0.514736	0.0066754	0.0192501	0.139109	0.544866	0.961816	-0.348771	0.116592	0.174946
gene-LOC115708320	XP_030492417.2	1	cytochrome b-c1 complex subunit 10, mitochondrial	AT2G40765.1	53.45	transmembrane protein		75.9312	73.1852	97.9167	64.9205	194.16	-0.0520042	0.800021	0.956875	-0.260686	0.175704	0.290976	0.358955	0.217592	0.782465	1.35155	9.28627e-09	4.29879e-08
gene-LOC133029954	XP_060957966.1	1	uncharacterized LOC133029954	AT4G29090.1	24.6	Ribonuclease H-like superfamily protein;start_range=.,14333528		0	0	0	0	0.0545625	0	1	1	0	1	1	0	1	1	0	1	1
gene-LOC115705131	XP_030488229.1	1	transcription elongation factor TFIIS	AT2G38560.1	53.91	transcript elongation factor IIS		57.871	50.787	52.6114	63.424	57.2152	-0.195141	0.19782	0.604194	0.108231	0.420951	0.560423	-0.146909	0.467943	0.941066	-0.0305559	0.862014	0.897458
gene-LOC115705132	XP_030488231.2	1	uncharacterized LOC115705132	AT5G05220.1	67.92	hypothetical protein		3.02128	2.31232	1.20583	1.92199	3.20506	-0.358649	0.622769	0.905039	-0.642474	0.413524	0.553395	0	1	1	0.135283	0.860836	0.896648
gene-LOC115705427	XP_030488621.2	1	uncharacterized LOC115705427	AT2G40770.3	59.71	RING-finger%2C DEAD-like helicase%2C PHD and SNF2 domain-containing protein;start_range=.,17013535		4.68908	4.45637	4.20862	5.14738	3.40839	-0.133283	0.466783	0.835272	0.0112607	0.94628	0.967351	-0.220896	0.348297	0.876254	-0.451121	0.0368071	0.0633277
gene-LOC115705994	XP_030489346.1	1	uncharacterized aarF domain-containing protein kinase At5g05200, chloroplastic	AT5G05200.1	79.81	Protein kinase superfamily protein		28.8408	21.5269	22.141	15.3827	14.7345	-0.427997	0.0307027	0.209735	-0.928216	7.06777e-07	5.04148e-06	-0.389909	0.116845	0.609095	-0.982903	2.13714e-05	6.59436e-05
gene-LOC115705376	XP_030488564.2	1	uncharacterized LOC115705376	AT5G05190.1	53.45	hypothetical protein (DUF3133)		6.67382	5.57859	5.39635	6.64891	7.40669	-0.260826	0.223456	0.637907	0.0311575	0.88555	0.929997	-0.315489	0.216942	0.781876	0.155045	0.507441	0.597506
gene-LOC133029956	XP_060957973.1	1	uncharacterized LOC133029956	AT4G29090.1	28.05	Ribonuclease H-like superfamily protein;start_range=.,14333528		0	0.0627115	0	0	0	0	1	1	0	1	1	0	1	1	0	1	1
gene-LOC115705190	XP_030488302.2	1	protein NETWORKED 4A	AT5G58320.5	30.36	Kinase interacting (KIP1-like) family protein		29.0876	27.7339	26.8559	23.486	11.8715	-0.0803786	0.668889	0.9215	-0.338512	0.051776	0.109704	-0.128932	0.578763	0.967268	-1.31297	1.93788e-09	9.6448e-09
gene-LOC115708280	XP_030492368.2	1	methylesterase 17	AT3G10870.1	65.76	methyl esterase 17		5.94843	8.72997	10.6805	26.1407	12.9989	0.541748	0.114194	0.461478	2.10016	3.10976e-14	5.83486e-13	0.820377	0.0304822	0.297804	1.10976	0.00214983	0.00479129
gene-LOC115704831	XP_030487901.2	1	serine/threonine-protein kinase AtPK2/AtPK19	AT3G08720.4	59.72	serine/threonine protein kinase 2		0.276202	0.0431162	0.025758	0.180007	9.7192	0	1	1	0	1	1	0	1	1	5.07419	7.90278e-22	9.37058e-21
gene-LOC115704672	XP_060958120.1	1	thioredoxin H-type-like	AT3G08710.3	59.23	thioredoxin H-type 9		0	0	0	0	0	0	1	1	0	1	1	0	1	1	0	1	1
gene-LOC115705923	XP_030489258.1	1	probable inactive receptor kinase At5g58300	AT5G58300.3	59.01	Leucine-rich repeat protein kinase family protein		19.2369	24.3576	25.1222	18.5074	10.3674	0.331437	0.0690316	0.346305	-0.0820814	0.64806	0.759303	0.372277	0.105291	0.582064	-0.906548	9.50534e-05	0.000265794
gene-LOC115705543	XP_030488759.2	1	uncharacterized LOC115705543	AT2G40800.1	61.87	import inner membrane translocase subunit		26.7015	31.3277	33.074	31.9199	53.2115	0.223014	0.176162	0.573166	0.231605	0.139555	0.242574	0.297567	0.166465	0.707289	0.979794	8.1603e-08	3.41159e-07
gene-LOC115705545	XP_030488761.1	1	large ribosomal subunit protein uL16	AT1G26910.1	87.16	Ribosomal protein L16p/L10e family protein		461.821	388.055	401.063	336.584	223.711	-0.255078	0.0863463	0.395835	-0.483112	0.000289575	0.00121948	-0.212055	0.289615	0.843151	-1.05715	1.28122e-09	6.48264e-09
gene-LOC115705544	XP_030488760.2	1	hydroxyacylglutathione hydrolase cytoplasmic	AT3G10850.1	77.52	Metallo-hydrolase/oxidoreductase superfamily protein		30.4769	26.5163	27.4544	30.0361	67.608	-0.209265	0.266934	0.686628	-0.0484659	0.787486	0.862209	-0.163628	0.491475	0.943877	1.1352	5.16587e-09	2.45533e-08
gene-LOC115703671	XP_030486771.1	1	heat shock 70 kDa protein, mitochondrial	AT5G09590.1	85.78	mitochondrial HSO70 2		52.5774	50.1671	54.5325	38.7317	68.1277	-0.0760297	0.615768	0.903094	-0.465623	0.00097603	0.00358168	0.0410899	0.84003	0.995797	0.360341	0.0814722	0.127871
gene-LOC115703828	XP_030486917.2	1	uncharacterized LOC115703828	AT5G01960.1	57.81	RING/U-box superfamily protein		5.27909	4.15744	4.59665	5.95552	7.11608	-0.355905	0.167579	0.559141	0.146116	0.543294	0.67251	-0.211858	0.471146	0.941081	0.413179	0.123401	0.18369
gene-LOC115703833	XP_030486924.2	1	protein GRIM REAPER	AT1G53130.1	45.77	Stigma-specific Stig1 family protein		0	0	0	0	0	0	1	1	0	1	1	0	1	1	0	1	1
gene-LOC115706250	XP_030489697.2	1	uncharacterized LOC115706250	AT3G31430.1	26.2	zinc knuckle (CCHC-type) family protein;start_range=.,12795861		0	0	0	0	0	0	1	1	0	1	1	0	1	1	0	1	1
gene-LOC133030761	XP_060959592.1	1	uncharacterized LOC133030761	AT4G29090.1	31.15	Ribonuclease H-like superfamily protein;start_range=.,14333528		0	0	0	0	0	0	1	1	0	1	1	0	1	1	0	1	1
gene-LOC115703830	XP_030486921.1	1	autophagy-related protein 18c	AT2G40810.2	74.39	autophagy-like protein		10.1169	8.54979	8.30559	9.62175	96.3708	-0.251051	0.280122	0.701635	-0.0949938	0.669812	0.77594	-0.29289	0.28503	0.84057	3.23914	2.37428e-66	1.16457e-64
gene-LOC115703831	XP_030486922.2	1	uncharacterized LOC115703831	AT3G56460.1	75.57	GroES-like zinc-binding alcohol dehydrogenase family protein		30.6411	30.6629	30.2811	35.1382	31.3303	-0.00588721	0.974298	0.994505	0.169837	0.303022	0.441378	-0.0283145	0.899782	0.997212	0.0172485	0.939323	0.956381
gene-LOC115703827	XP_030486916.2	1	uncharacterized LOC115703827	AT3G10840.1	55.65	alpha/beta-Hydrolases superfamily protein		13.1023	13.6824	11.8082	7.09921	4.10375	0.0553804	0.787833	0.953609	-0.907642	9.79806e-05	0.000461359	-0.159628	0.527566	0.956143	-1.69247	1.01811e-09	5.18794e-09
gene-LOC115703829	XP_030486920.2	1	protein SRC2	AT2G40815.2	62.91	Calcium-dependent lipid-binding (CaLB domain) family protein;start_range=.,17034736		10.4745	6.25526	6.279	10.7407	7.63715	-0.747485	0.00305376	0.0410667	0.0119137	0.958492	0.974892	-0.748726	0.0103788	0.146182	-0.47001	0.0919	0.142101
gene-LOC115703832	XP_030486923.2	1	GCN5-related N-acetyltransferase 3, chloroplastic	AT4G19985.6	43.97	Acyl-CoA N-acyltransferases (NAT) superfamily protein		2.10487	1.67358	1.97008	1.55026	2.71428	-0.339021	0.297245	0.716859	-0.467785	0.153631	0.261613	-0.104504	0.766654	0.991551	0.353374	0.294825	0.384364
gene-LOC115707676	XP_030491563.2	1	uncharacterized LOC115707676	AT1G20670.1	38.69	DNA-binding bromodomain-containing protein		1.36253	1.38895	1.63115	2.57835	2.11912	0.0247227	0.947213	0.988409	0.98634	0.00391898	0.0121131	0.207309	0.605538	0.970504	0.621127	0.106619	0.161625
gene-LOC115706085	XP_030489461.2	1	cytochrome P450 714A1	AT5G24910.1	60.79	cytochrome P450%2C family 714%2C subfamily A%2C polypeptide 1		3.52394	8.90282	4.49455	23.609	6.9386	1.33351	3.03834e-06	0.00013075	2.72282	9.37847e-36	7.35869e-34	0.344937	0.347273	0.876254	0.963082	0.00267355	0.00586026
gene-LOC115704967	XP_030488047.2	1	uncharacterized LOC115704967	AT3G54190.1	84.2	Transducin/WD40 repeat-like superfamily protein		70.4905	63.4175	64.4757	93.369	69.5299	-0.159376	0.309006	0.729348	0.386426	0.00370433	0.0115215	-0.143294	0.495504	0.945461	-0.0389893	0.824529	0.868302
gene-LOC115704964	XP_030488038.2	1	uncharacterized LOC115704964	AT3G14172.1	34.83	GPI-anchored adhesin-like protein		25.3088	25.2976	25.2292	20.6474	12.1661	-0.00565513	0.969929	0.993428	-0.322471	0.0178533	0.0448593	-0.00403447	0.985958	0.999496	-1.05953	1.30917e-07	5.36596e-07
gene-LOC115704966	XP_030488041.2	1	uncharacterized LOC115704966	AT1G33400.1	46.31	Tetratricopeptide repeat (TPR)-like superfamily protein		3.83108	4.34618	4.74365	4.84778	4.81803	0.171019	0.518262	0.862291	0.32068	0.215354	0.340082	0.316281	0.289777	0.843457	0.327735	0.288868	0.378357
gene-LOC115707644	XP_030491524.1	1	probable pterin-4-alpha-carbinolamine dehydratase, chloroplastic	AT5G51110.1	64.97	Transcriptional coactivator/pterin dehydratase		74.6052	111.814	98.6722	36.9157	29.6942	0.577942	0.000260656	0.005895	-1.04128	3.47334e-11	4.62986e-10	0.392874	0.0851411	0.527677	-1.34198	2.00599e-10	1.09825e-09
gene-LOC115706325	XP_030489802.1	1	pectinesterase PPME1-like	AT1G69940.1	52.89	Pectin lyase-like superfamily protein		0	0	0	0	1.12471	0	1	1	0	1	1	0	1	1	0	1	1
gene-LOC115704833	XP_030487904.2	1	probable pectinesterase 50	AT5G07430.1	53.95	Pectin lyase-like superfamily protein		5.88964	4.80671	6.14427	7.25066	4.2372	-0.302757	0.35593	0.767712	0.270281	0.397655	0.538125	0.0480163	0.894987	0.997076	-0.491529	0.188209	0.262531
gene-LOC133033633	XP_060964608.1	1	uncharacterized LOC133033633	AT3G09510.1	23.31	Ribonuclease H-like superfamily protein;start_range=.,2921804		0	0	0	0	0	0	1	1	0	1	1	0	1	1	0	1	1
gene-LOC115708114	XP_030492170.2	1	uncharacterized LOC115708114	AT4G33550.2	33.02	Bifunctional inhibitor/lipid-transfer protein/seed storage 2S albumin superfamily protein		0	0	0	0	0	0	1	1	0	1	1	0	1	1	0	1	1
gene-LOC115704356	XP_030487426.2	1	uncharacterized LOC115704356	AT3G57587.1	23.32	Ta11-like non-LTR retrotransposon;start_range=.,21328263		0	0	0	0	0	0	1	1	0	1	1	0	1	1	0	1	1
gene-LOC115704343	XP_030487413.2	1	uncharacterized LOC115704343	AT4G33550.2	31.43	Bifunctional inhibitor/lipid-transfer protein/seed storage 2S albumin superfamily protein		0.1924	0.278601	0.980647	0.56413	0.37902	0	1	1	0	1	1	0	1	1	0	1	1
gene-LOC115704648	XP_030487709.2	1	uncharacterized LOC115704648	AT4G33550.2	31.43	Bifunctional inhibitor/lipid-transfer protein/seed storage 2S albumin superfamily protein		0.511138	0.688108	0.886098	0.509822	0.427036	0	1	1	0	1	1	0	1	1	0	1	1
gene-LOC115707598	XP_030491470.1	1	large ribosomal subunit protein bL31c	AT1G75350.1	65.91	Ribosomal protein L31		270.796	320.788	297.752	110.81	99.4466	0.241966	0.135405	0.506918	-1.3176	3.32734e-18	8.79579e-17	0.128772	0.570882	0.96639	-1.45397	2.34129e-14	1.75567e-13
gene-LOC115706680	XP_030490253.2	1	uncharacterized LOC115706680	AT4G33550.2	27.52	Bifunctional inhibitor/lipid-transfer protein/seed storage 2S albumin superfamily protein		0.25867	0.316074	1.08463	0.260789	0.353463	0	1	1	0	1	1	0	1	1	0	1	1
gene-LOC133033727	XP_060964774.1	1	uncharacterized LOC133033727					0	0	0	0	0	0	1	1	0	1	1	0	1	1	0	1	1
gene-LOC115705836	XP_030489140.1	1	protein S-acyltransferase 21	AT2G33640.1	55.33	DHHC-type zinc finger family protein		32.2801	31.4764	31.8229	25.2602	24.0748	-0.0438665	0.772654	0.950551	-0.377454	0.00718733	0.0205342	-0.0317206	0.880861	0.996876	-0.437664	0.0163233	0.0305214
gene-LOC115706484	XP_030490005.2	1	putative pectinesterase 63	AT5G61680.1	58.06	Pectin lyase-like superfamily protein		0.0259883	0	0	0	0.46768	0	1	1	0	1	1	0	1	1	0	1	1
gene-LOC133033733	XP_060964786.1	1	uncharacterized LOC133033733	AT4G20520.1	37.14	RNA binding / RNA-directed DNA polymerase;start_range=.,11045912		0	0	0	0	0	0	1	1	0	1	1	0	1	1	0	1	1
gene-LOC115704757	XP_030487822.1	1	metacaspase-1	AT1G02170.1	68.51	metacaspase 1		5.58047	2.97985	7.31177	4.2907	3.27845	-0.912757	0.00750889	0.0795089	-0.402775	0.194471	0.315089	0.376591	0.248708	0.812267	-0.775473	0.0355471	0.0614011
gene-LOC115707426	XP_030491248.1	1	uncharacterized LOC115707426					0.13426	0.199422	0.143744	0.103012	0.252633	0	1	1	0	1	1	0	1	1	0	1	1
gene-LOC115708099	XP_030492146.1	1	superoxide dismutase [Fe], chloroplastic	AT5G51100.1	66.08	Fe superoxide dismutase 2		203.983	258.992	172.704	113.746	48.7186	0.339736	0.0508551	0.292053	-0.865624	3.99828e-08	3.48226e-07	-0.248498	0.331745	0.869696	-2.07807	1.44345e-25	2.04522e-24
gene-LOC115708098	XP_030492144.1	1	cell division cycle 20.3, cofactor of APC complex-like	AT5G27570.1	47.07			0.218774	0.177142	0.212018	0.242088	88.715	0	1	1	0	1	1	0	1	1	8.68985	3.00621e-84	2.33626e-82
gene-LOC115704724	XP_030487791.2	1	protein disulfide-isomerase-like	AT1G77510.1	61.54	PDI-like 1-2		0.817125	0.742633	0.974133	0.533905	0.728914	0	1	1	0	1	1	0	1	1	0	1	1
gene-LOC115706101	XP_030489486.1	1	polyadenylate-binding protein 1	AT5G51120.1	71.62	polyadenylate-binding protein 1		67.9561	70.3408	80.647	58.8833	36.8269	0.0802758	0.606034	0.900059	-0.206409	0.151374	0.258638	0.242421	0.236249	0.800569	-0.880783	3.7067e-06	1.2716e-05
gene-LOC115708242	XP_030492319.1	1	mediator of RNA polymerase II transcription subunit 31	AT5G19910.1	70.79	SOH1 family protein		15.4821	17.2594	18.7377	14.9401	48.8624	0.0870828	0.718447	0.934415	-0.0101683	0.965711	0.979039	0.205943	0.482688	0.943183	1.52303	3.70765e-10	1.97273e-09
gene-LOC115705444	XP_030488640.1	1	glutamate dehydrogenase A	AT5G07440.2	87.83	glutamate dehydrogenase 2		6.76899	6.55176	5.96407	5.59389	61.5555	-0.0590582	0.821292	0.961882	-0.301697	0.242545	0.372856	-0.198774	0.510646	0.950899	3.16547	1.80705e-49	5.71129e-48
gene-LOC115705445	XP_030488641.1	1	ubiquitin-like protein 5	AT5G42300.1	94.52	ubiquitin-like protein 5		0.285273	0.34582	0	0.29005	0.880204	0	1	1	0	1	1	0	1	1	0	1	1
gene-LOC115705446	XP_060958202.1	1	ubiquitin-like protein 5	AT5G42300.1	94.52	ubiquitin-like protein 5		0.333457	0.223413	0.178076	0.631187	1.4424	0	1	1	0	1	1	0	1	1	0	1	1
gene-LOC133030021	XP_060958205.1	1	ubiquitin-like protein 5	AT5G42300.1	94.52	ubiquitin-like protein 5		2.61676	5.03298	3.3616	4.37557	8.82534	0.941813	0.0985923	0.425914	0.713362	0.241611	0.371753	0.354069	0.597433	0.969223	1.74044	0.00162786	0.00370151
gene-LOC133030023	XP_060958211.1	1	ubiquitin-like protein 5	AT5G42300.1	94.52	ubiquitin-like protein 5		0	0	0	0	0	0	1	1	0	1	1	0	1	1	0	1	1
gene-LOC133033735	XP_060964787.1	1	probable inactive histone-lysine N-methyltransferase SUVR2	AT5G43990.9	55.88	SET-domain containing protein lysine methyltransferase family protein		0	0	0	0	0	0	1	1	0	1	1	0	1	1	0	1	1
gene-LOC133030022	XP_060958208.1	1	ubiquitin-like protein 5	AT5G42300.1	94.52	ubiquitin-like protein 5		0.564608	0.224049	0.25508	0	0.503484	0	1	1	0	1	1	0	1	1	0	1	1
gene-LOC115707302	XP_030491074.2	1	light-harvesting complex-like protein 3 isotype 1, chloroplastic	AT4G17600.1	52.71	Chlorophyll A-B binding family protein		0.388305	0.915941	0.400079	0.665315	2.12964	0	1	1	0	1	1	0	1	1	2.40956	0.00485808	0.0101457
gene-LOC115705988	XP_030489338.1	1	uncharacterized LOC115705988	AT5G51150.1	76.52	Mitochondrial import inner membrane translocase subunit Tim17/Tim22/Tim23 family protein		25.8614	23.5938	24.9549	20.5977	34.2193	-0.138953	0.417278	0.806837	-0.350852	0.037418	0.0839499	-0.0601039	0.783983	0.992996	0.389941	0.0431974	0.0729795
gene-LOC115706604	XP_030490171.2	1	ankyrin repeat-containing protein BDA1	AT5G54610.1	44.44	ankyrin		2.22513	2.63098	3.22583	4.88388	1.9617	0.238541	0.679613	0.925081	1.09326	0.0336216	0.0767591	0.536332	0.392161	0.901958	-0.174739	0.800342	0.848856
gene-LOC115704997	XP_030488085.2	1	ankyrin repeat-containing protein BDA1	AT5G51160.1	43.39	Ankyrin repeat family protein		0	0.0446136	0.0231297	0.0184519	0.074932	0	1	1	0	1	1	0	1	1	0	1	1
gene-LOC115703638	XP_030486735.1	1	DEAD-box ATP-dependent RNA helicase 10	AT5G60990.1	56.96	DEA(D/H)-box RNA helicase family protein		25.4201	21.7843	22.7893	20.601	23.5009	-0.226959	0.291443	0.710735	-0.329315	0.117858	0.212632	-0.16575	0.527485	0.956143	-0.121896	0.631099	0.709465
gene-LOC115706647	XP_060958237.1	1	ATP-dependent DNA helicase SRS2-like protein At4g25120	AT4G25120.1	61.61	P-loop containing nucleoside triphosphate hydrolases superfamily protein		8.50761	7.52994	7.64291	6.2945	12.6081	-0.100008	0.598424	0.897087	-0.320217	0.0852187	0.164142	-0.112572	0.633215	0.975559	0.67652	0.00110996	0.00260744
gene-LOC115705454	XP_030488652.1	1	uncharacterized LOC115705454	AT5G51170.1	60	U6 snRNA phosphodiesterase-like protein;start_range=.,20793906		25.4648	23.7316	27.0612	19.2797	16.8479	-0.107116	0.588672	0.894574	-0.426608	0.0337077	0.0769149	0.0787662	0.750869	0.990009	-0.610614	0.0100451	0.0196545
gene-LOC115705453	XP_030488651.1	1	protein ORANGE-GREEN, chloroplastic	AT5G61670.2	74.44	orange protein		23.236	22.8714	21.7845	20.265	28.8651	-0.0317904	0.859251	0.971277	-0.22393	0.192993	0.313194	-0.104777	0.644896	0.976293	0.297332	0.138404	0.202711
gene-LOC115706679	XP_060958247.1	1	uncharacterized LOC115706679	AT1G31150.1	24.17	K-box region protein (DUF1985)		0.587508	0.452651	0.264583	0.236238	0.174457	-0.372077	0.563652	0.884746	-1.31224	0.0763853	0.150217	-1.16359	0.119098	0.613922	-1.82531	0.0438386	0.0739306
gene-LOC115703561	XP_030486649.2	1	pentatricopeptide repeat-containing protein At5g10690-like	AT5G10690.2	57.73	pentatricopeptide (PPR) repeat-containing protein / CBS domain-containing protein		13.6294	17.088	13.4004	6.89563	6.81492	0.318067	0.10344	0.438614	-1.00775	2.71838e-05	0.000145593	-0.0354118	0.909705	0.997278	-1.01507	3.22046e-05	9.663e-05
gene-LOC115708235	XP_030492313.1	1	glycine-rich cell wall structural protein 2	AT5G61660.1	44.16	glycine-rich protein		56.5836	51.4057	46.8478	104.739	66.1413	-0.146309	0.424938	0.811182	0.853387	1.55148e-07	1.22682e-06	-0.286267	0.232314	0.79772	0.210399	0.324963	0.416487
gene-LOC115705091	XP_030488189.2	1	histone-lysine N-methyltransferase, H3 lysine-9 specific SUVH6	AT2G35160.5	42.16	SU(VAR)3-9 homolog 5		0.181755	0.58785	0.269162	1.40502	152.938	1.67621	0.0368363	0.236415	2.91377	6.59819e-06	3.95892e-05	0	1	1	9.69401	5.50301e-117	8.9e-115
gene-LOC115704697	XP_030487757.2	1	cyclin-U4-1	AT2G44740.1	68.18	cyclin p4%3B1		13.4632	9.36912	8.38761	9.5519	4.50262	-0.53576	0.0759989	0.367471	-0.52403	0.0803798	0.156534	-0.69865	0.0436473	0.372355	-1.59385	1.42753e-05	4.53506e-05
gene-LOC115705870	XP_030489177.1	1	peptide methionine sulfoxide reductase A1	AT4G25130.1	69.08	peptide met sulfoxide reductase 4		139.511	114.149	101.269	59.4605	130.33	-0.29475	0.0748843	0.363759	-1.25542	1.18739e-16	2.75863e-15	-0.470984	0.0363805	0.332133	-0.110792	0.550962	0.638615
gene-LOC115706650	XP_030490227.2	1	stellacyanin	AT5G07475.1	51.3	Cupredoxin superfamily protein		0.06722	0.297029	0.431654	0.785855	0.72965	0	1	1	0	1	1	0	1	1	0	1	1
gene-LOC115703731	XP_030486824.1	1	uncharacterized LOC115703731	AT5G07490.1	55.83	transmembrane protein		0.23936	0.771223	0.648327	1.74043	1.17976	0	1	1	0	1	1	0	1	1	0	1	1
gene-LOC115705432	XP_030488626.2	1	pre-mRNA-processing protein 40A	AT1G44910.1	46.83	pre-mRNA-processing protein 40A		13.2499	12.857	12.62	13.6666	15.5552	-0.0551198	0.74124	0.941775	0.0122655	0.935933	0.961156	-0.0866224	0.686167	0.980067	0.210451	0.286828	0.376014
gene-LOC115706863	XP_060974878.1	1	uncharacterized LOC115706863	AT5G47390.1	67.12	myb-like transcription factor family protein		0	0	0	0	2.42293	0	1	1	0	1	1	0	1	1	8.23282	1.75351e-07	7.07869e-07
gene-LOC115706868	XP_030490487.2	1	zinc finger CCCH domain-containing protein 54	AT5G07500.1	64.74	Zinc finger C-x8-C-x5-C-x3-H type family protein	PK14631.1	0.0807125	0.079366	0.178426	0.510158	0.9025	0	1	1	0	1	1	0	1	1	0	1	1
gene-LOC115706895	XP_060958286.1	1	cyclic nucleotide-gated ion channel 2-like	AT5G15410.2	61.86	Cyclic nucleotide-regulated ion channel family protein		0	0.0449837	0.0630935	0.150762	0.273094	0	1	1	0	1	1	0	1	1	0	1	1
gene-LOC115706848	XP_030490466.1	1	oleosin Cor a 13	AT4G25140.1	62.5	oleosin 1		1.23758	0.291911	0.858205	2.77342	2.25793	0	1	1	1.14251	0.145197	0.250188	0	1	1	0.865074	0.29764	0.387135
gene-LOC115708225	XP_030492304.2	1	signal recognition particle 14 kDa protein	AT2G43640.2	79.46	Signal recognition particle%2C SRP9/SRP14 subunit		36.8942	30.8163	32.6587	31.4111	67.2426	-0.262716	0.203972	0.611951	-0.26101	0.203504	0.325592	-0.185539	0.51517	0.952327	0.857545	0.000312251	0.000809695
gene-LOC133033736	XP_060964789.1	1	uncharacterized LOC133033736	AT5G64830.1	46.33	programmed cell death 2 C-terminal domain-containing protein		0.038405	0	0	0	0.129585	0	1	1	0	1	1	0	1	1	0	1	1
gene-LOC115705071	XP_030488170.2	1	ethylene-responsive transcription factor 2	AT4G17500.1	66.35	ethylene responsive element binding factor 1	PK28774.1	0.755668	0.151632	0.593627	0.225814	1.15902	0	1	1	0	1	1	0	1	1	0.589513	0.484198	0.575384
gene-LOC115705632	XP_030488884.2	1	ethylene-responsive transcription factor 5	AT5G51190.1	45.33	Integrase-type DNA-binding superfamily protein	PK09781.1	33.309	19.2134	16.6545	31.701	21.795	-0.806567	0.000158432	0.00389877	-0.100086	0.588089	0.709455	-1.01623	0.000363171	0.0106782	-0.63002	0.00534126	0.011057
gene-LOC133033738	XP_060964790.1	1	uncharacterized LOC133033738					0	0	0	0	0	0	1	1	0	1	1	0	1	1	0	1	1
gene-LOC115706715	XP_030490293.1	1	ethylene-responsive transcription factor ERF107	AT5G07580.1	41.26	ethylene-responsive transcription factor;start_range=.,2399726	PK26398.1	36.9988	19.8689	24.0386	43.1044	21.1061	-0.905038	5.31239e-06	0.000219061	0.193604	0.216483	0.34118	-0.633185	0.00695812	0.110566	-0.824257	9.25741e-05	0.000259346
gene-LOC115705140	XP_030488238.2	1	ethylene-responsive transcription factor ERF106	AT5G07580.1	42.93	ethylene-responsive transcription factor;start_range=.,2399726	PK01935.1	18.8997	11.7445	15.5037	25.0988	11.5934	-0.698382	0.006326	0.0702178	0.379869	0.0541482	0.113794	-0.299072	0.253175	0.814146	-0.720528	0.0100465	0.019655
gene-LOC115705137	XP_060958315.1	1	ATP-dependent 6-phosphofructokinase 4, chloroplastic	AT5G61580.1	80.44	phosphofructokinase 4		21.7232	14.7787	17.1956	11.1751	19.0517	-0.562849	0.00136105	0.0224386	-0.983194	1.46107e-08	1.35889e-07	-0.347479	0.115123	0.606508	-0.203244	0.306631	0.396989
gene-LOC115705136	XP_030488235.2	1	putative lipase ROG1	AT5G51180.2	69.25	alpha/beta-Hydrolases superfamily protein		16.8103	14.4024	15.3407	13.9398	13.1306	-0.231135	0.254671	0.6732	-0.294837	0.128718	0.228195	-0.14161	0.566899	0.96639	-0.369475	0.116297	0.174592
gene-LOC115705135	XP_030488234.2	1	uncharacterized protein At3g06530	AT3G06530.5	48.38	ARM repeat superfamily protein;start_range=.,2022596		15.2604	14.1113	15.9578	16.3857	15.3637	-0.121647	0.431973	0.814455	0.0811015	0.550189	0.678182	0.0537229	0.803724	0.993728	-0.00590912	0.972405	0.980488
gene-LOC115706584	XP_030490143.2	1	uncharacterized LOC115706584	AT5G51220.1	62.89	ubiquinol-cytochrome C chaperone family protein		7.86759	10.0336	9.49847	11.9975	11.9991	0.343323	0.188254	0.591157	0.582369	0.020425	0.0503824	0.259234	0.392596	0.901958	0.594874	0.037897	0.0649477
gene-LOC133033739	XP_060964792.1	1	lisH domain-containing protein C1711.05-like					0	0	0	0	0	0	1	1	0	1	1	0	1	1	0	1	1
gene-LOC115706580	XP_030490138.2	1	F-box protein At5g07610-like	AT5G07610.1	34.93	F-box family protein;start_range=.,2406068		0.0214398	0.0188896	0	0.0949304	0.128859	0	1	1	0	1	1	0	1	1	0	1	1
gene-LOC115707605	XP_060958335.1	1	F-box protein At5g07610-like	AT5G07610.1	30.75	F-box family protein;start_range=.,2406068		0	0	0	0	0.626821	0	1	1	0	1	1	0	1	1	0	1	1
gene-LOC115706585	XP_030490144.2	1	acid phosphatase 1	AT5G51260.1	61.22	HAD superfamily%2C subfamily IIIB acid phosphatase		19.6119	12.2477	12.9427	10.6186	52.7215	-0.68167	0.00219318	0.0320071	-0.910047	1.35145e-05	7.64373e-05	-0.609848	0.0155338	0.193901	1.41385	1.49018e-11	9.06839e-11
gene-LOC115706581	XP_030490140.2	1	putative kinase-like protein TMKL1	AT5G07620.1	59.24	Protein kinase superfamily protein;start_range=.,2407401		11.1332	9.35531	8.45344	10.8073	2.72626	-0.258423	0.190056	0.59365	-0.0660712	0.733335	0.82371	-0.407308	0.0953042	0.552698	-2.04408	1.42548e-14	1.08387e-13
gene-LOC115706578	XP_030490135.2	1	mannan endo-1,4-beta-mannosidase 6	AT5G01930.1	74.2	Glycosyl hydrolase superfamily protein		12.7848	11.1661	10.9159	8.23535	6.23009	-0.197427	0.35431	0.766234	-0.639392	0.00330403	0.0104001	-0.237511	0.369446	0.888248	-1.06027	7.11943e-05	0.000202964
gene-LOC115707737	XP_060974887.1	1	zinc finger protein ZAT3	AT4G35280.1	44.62	C2H2-like zinc finger protein		0.0219936	0	0	0	12.9324	0	1	1	0	1	1	0	1	1	9.33936	3.7832e-10	2.00994e-09
gene-LOC115706576	XP_030490131.2	1	U-box domain-containing protein 35	AT4G25160.1	51.03	U-box domain-containing protein kinase family protein		4.88429	3.83619	4.02706	3.25754	5.51724	-0.369317	0.145214	0.522891	-0.600692	0.0230212	0.0556962	-0.286775	0.335765	0.872356	0.156401	0.654363	0.729178
gene-LOC115707795	XP_060964793.1	1	uncharacterized LOC115707795	AT1G21280.1	31.72	Copia-like polyprotein/retrotransposon		0	0	0	0	0	0	1	1	0	1	1	0	1	1	0	1	1
gene-LOC133033741	XP_060964795.1	1	uncharacterized LOC133033741	AT2G06105.1	41.67			0	0	0	0	0	0	1	1	0	1	1	0	1	1	0	1	1
gene-LOC115704978	XP_030488056.2	1	derlin-1.1-like	AT4G29330.1	54.34	DERLIN-1		0.458132	0.681121	1.60976	1.16563	2.81597	0	1	1	1.38192	0.092298	0.175044	1.85287	0.0176023	0.211241	2.63772	0.00015088	0.000410269
gene-LOC115706113	XP_030489499.2	1	ceramide kinase	AT5G51290.1	59.73	Diacylglycerol kinase family protein		4.44771	5.35271	5.59971	6.21078	7.07057	0.258183	0.313705	0.733975	0.454709	0.0643515	0.13064	0.322096	0.278739	0.835898	0.650998	0.0195809	0.0359571
gene-LOC115708063	XP_030492095.2	1	probable isoaspartyl peptidase/L-asparaginase 3	AT5G61540.1	74.34	N-terminal nucleophile aminohydrolases (Ntn hydrolases) superfamily protein		8.38151	9.18973	7.4123	10.4314	8.91188	0.110411	0.661639	0.919377	0.40124	0.089712	0.171198	-0.145616	0.619691	0.973364	0.132164	0.635473	0.712956
gene-LOC115703655	XP_060958428.1	1	transcription factor DUO1-like	AT3G60460.1	76.36	myb-like HTH transcriptional regulator family protein		2.13e-88	0.10757	1.335e-83	0.0300916	0.279028	0	1	1	0	1	1	0	1	1	0	1	1
gene-LOC115705521	XP_030488723.1	1	uncharacterized Rho GTPase-activating protein At5g61530	AT5G61530.1	73.28	small G protein family protein / RhoGAP family protein		25.1855	25.247	28.8876	36.1099	57.2669	-0.00313527	0.986968	0.998217	0.490938	0.00453177	0.0137121	0.186844	0.441907	0.93077	1.16755	8.11386e-09	3.78633e-08
gene-LOC115707412	XP_030491230.2	1	hexose carrier protein HEX6	AT5G61520.1	65.59	Major facilitator superfamily protein		0.511499	0.673558	0.750069	1.89803	0.795599	0.368366	0.472747	0.838789	1.86778	2.86107e-06	1.83902e-05	0.551051	0.318049	0.863058	0.608983	0.302047	0.391986
gene-LOC115704953	XP_030488027.2	1	putative expansin-B2	AT1G65680.1	59.02	expansin B2;start_range=.,24427266		0	0	0	0	0.260649	0	1	1	0	1	1	0	1	1	0	1	1
gene-LOC115706079	XP_030489455.2	1	ETHYLENE INSENSITIVE 3-like 1 protein	AT3G20770.1	55.59	Ethylene insensitive 3 family protein	PK01239.1	35.6915	43.6333	43.0183	85.8347	37.0114	0.281234	0.0687081	0.345248	1.2427	2.07667e-22	7.43722e-21	0.258431	0.20197	0.759435	0.0365933	0.839317	0.880312
gene-LOC133030178	XP_060958454.1	1	uncharacterized LOC133030178	AT5G61510.1	73.9	GroES-like zinc-binding alcohol dehydrogenase family protein		62.474	53.4124	55.6948	66.8273	61.5037	-0.23199	0.14546	0.52309	0.0721007	0.6039	0.723702	-0.175767	0.389612	0.901169	-0.0368535	0.832233	0.874722
gene-LOC133030175	XP_060958442.1	1	protein DYAD	AT5G51330.1	36.02	SWITCH1		0	0.0268446	0.0141171	0	20.6068	0	1	1	0	1	1	0	1	1	11.9903	5.3846e-14	3.93104e-13
gene-LOC115703659	XP_060958445.1	1	8-amino-7-oxononanoate synthase	AT5G04620.2	67.22	biotin F		5.24344	5.74179	5.90718	3.74013	5.82278	0.1221	0.656355	0.91718	-0.529367	0.0727202	0.144345	0.157416	0.623969	0.974261	0.128559	0.687159	0.757805
gene-LOC115703660	XP_030486760.2	1	gibberellin 20-oxidase-like protein	AT4G23340.1	60.31	2-oxoglutarate (2OG) and Fe(II)-dependent oxygenase superfamily protein		0.143626	0	0.026589	0	2.84693	0	1	1	0	1	1	0	1	1	4.19319	0.0195899	0.0359647
gene-LOC115703872	XP_030486967.2	1	carboxylesterase 1	AT5G62180.1	52.94	carboxyesterase 20		4.63104	4.26069	2.83749	2.98651	2.98745	-0.132815	0.714082	0.932489	-0.662468	0.0791026	0.15457	-0.728382	0.0884759	0.537194	-0.64467	0.124134	0.184605
gene-LOC115705439	XP_030488635.2	1	uncharacterized LOC115705439	AT4G25180.1	41.9	RNA polymerase III RPC4		27.9434	25.2852	24.5461	23.0191	24.859	-0.148272	0.476172	0.840867	-0.303861	0.141761	0.245547	-0.195201	0.45623	0.937188	-0.179778	0.454094	0.546483
gene-LOC115705438	XP_030488634.2	1	uncharacterized LOC115705438	AT4G25170.1	41.67	Uncharacterized conserved protein (UCP012943)		30.221	56.2433	42.2759	23.9549	11.9843	0.889672	5.97034e-07	3.11181e-05	-0.360794	0.0449257	0.097708	0.474382	0.0487931	0.396701	-1.35114	3.89e-07	1.49376e-06
gene-LOC115706062	XP_030489438.1	1	large ribosomal subunit protein eL15y	AT4G17390.1	89.71	Ribosomal protein L23/L15e family protein		184.156	158.823	194.865	130.018	124.825	-0.218094	0.147131	0.526133	-0.529798	0.000195689	0.000855433	0.0722354	0.726166	0.985213	-0.571415	0.00433791	0.00914015
gene-LOC115708308	XP_030492397.2	1	F-box protein At5g07670-like	AT5G07670.1	60.23	RNI-like superfamily protein		5.16045	4.02013	4.0602	4.88594	9.67362	-0.307918	0.231955	0.646984	-0.110321	0.659558	0.767928	-0.248848	0.400739	0.9079	0.951874	0.000359205	0.000922585
gene-LOC115707544	XP_060958474.1	1	uncharacterized LOC115707544	AT5G07630.1	67.75	lipid transporter;start_range=.,2411434		7.17263	7.36921	8.00874	7.57045	7.31797	0.0315935	0.887361	0.978065	0.054372	0.802801	0.873436	0.149281	0.569994	0.96639	0.0164189	0.949523	0.963749
gene-LOC115705501	XP_030488704.2	1	leucine-rich repeat receptor-like protein kinase TDR	AT5G61480.1	64.07	Leucine-rich repeat protein kinase family protein		13.2407	14.7489	15.6733	10.4125	3.96164	0.146458	0.450761	0.826207	-0.370617	0.0731647	0.144977	0.230405	0.366083	0.886871	-1.75787	7.47399e-11	4.25136e-10
gene-LOC115703663	XP_030486763.2	1	QWRF motif-containing protein 7	AT4G25190.1	38.46	QWRF motif protein (DUF566)		0	0	0	0	0.437749	0	1	1	0	1	1	0	1	1	0	1	1
gene-LOC115703664	XP_030486764.2	1	zinc finger protein ZAT1-like	AT1G02030.1	34.08	C2H2-like zinc finger protein		0	0	0	0	11.2844	0	1	1	0	1	1	0	1	1	9.4689	4.08699e-10	2.16348e-09
gene-LOC115706037	XP_030489397.2	1	structural maintenance of chromosomes protein 6A	AT5G61460.1	59.11	P-loop containing nucleoside triphosphate hydrolases superfamily protein		14.8499	18.1244	18.2245	16.3235	19.3296	0.279853	0.0882166	0.400518	0.113097	0.464751	0.603153	0.284415	0.183792	0.734164	0.364965	0.0534121	0.088041
gene-LOC115704034	XP_030487117.2	1	F-box protein At5g07670	AT5G07670.1	60.66	RNI-like superfamily protein		21.0815	23.5716	25.461	10.7221	6.01733	0.152575	0.36113	0.770806	-1.00018	8.91731e-09	8.5517e-08	0.26063	0.230339	0.795105	-1.82491	1.13526e-15	9.33159e-15
gene-LOC115707225	XP_060958488.1	1	uncharacterized LOC115707225	AT5G61450.1	70.19	P-loop containing nucleoside triphosphate hydrolases superfamily protein		9.86665	11.4824	10.7484	17.3181	8.49056	0.210526	0.302747	0.72277	0.786009	1.70777e-05	9.50034e-05	0.114682	0.6687	0.978814	-0.231586	0.358999	0.451548
gene-LOC115708353	XP_030492465.1	1	small ribosomal subunit protein eS27y	AT3G61110.1	95.35	ribosomal protein S27		354.747	323.823	368.078	242.485	230.303	-0.136015	0.336522	0.753447	-0.587045	1.1562e-05	6.64832e-05	0.0401783	0.852025	0.996523	-0.633753	0.000286807	0.000749455
gene-LOC115705099	XP_030488197.2	1	NADPH-dependent aldo-keto reductase, chloroplastic	AT5G62420.1	68.99	NAD(P)-linked oxidoreductase superfamily protein		1.31862	1.30959	1.31867	1.70586	1.30154	-0.0335053	0.956387	0.991215	0.350591	0.540824	0.670814	-0.00911187	0.988217	0.999496	-0.0421802	0.949344	0.963677
gene-LOC115704762	XP_060958504.1	1	pentatricopeptide repeat-containing protein At1g77405	AT1G77405.1	66.12	Pentatricopeptide repeat (PPR) superfamily protein		1.88075	1.5784	1.41159	1.64033	1.49493	-0.26075	0.559924	0.883368	-0.209827	0.637644	0.751303	-0.418445	0.388018	0.900158	-0.337356	0.501903	0.592345
gene-LOC115704763	XP_030487831.2	1	receptor homology region, transmembrane domain- and RING domain-containing protein 2	AT1G71980.1	60.53	Protease-associated (PA) RING/U-box zinc finger family protein		3.96924	4.14226	3.45954	7.05258	4.40818	0.0525011	0.862198	0.971853	0.802401	0.00241319	0.00793609	-0.207931	0.55323	0.96417	0.13105	0.703233	0.771396
gene-LOC115704761	XP_030487829.2	1	structural maintenance of chromosomes protein 2-1	AT3G47460.2	76.86	Structural maintenance of chromosomes (SMC) family protein		20.6445	26.1861	25.2118	14.923	29.7464	0.335116	0.0453028	0.271157	-0.491152	0.00212917	0.00711868	0.277277	0.200216	0.75754	0.510358	0.0210736	0.0383607
gene-LOC115706802	XP_030490396.2	1	putative nitric oxide synthase	AT3G47450.2	69.29	P-loop containing nucleoside triphosphate hydrolases superfamily protein		18.3527	19.9704	17.8956	15.9618	9.55296	0.114894	0.533214	0.869166	-0.224119	0.193353	0.313602	-0.0459727	0.848337	0.996523	-0.955823	1.60742e-05	5.06608e-05
gene-LOC115708196	XP_030492266.1	1	probable aquaporin TIP5-1	AT3G47440.1	61.54	tonoplast intrinsic protein 5%3B1		0.0915555	0.154825	0.135132	0.0754911	2.91266	0	1	1	0	1	1	0	1	1	0	1	1
gene-LOC115707087	XP_030490787.2	1	GDP-mannose transporter GONST3	AT1G76340.1	80.49	golgi nucleotide sugar transporter 3		18.3215	16.8698	15.8155	17.1703	16.6075	-0.125383	0.494596	0.850528	-0.118506	0.492596	0.627749	-0.223267	0.337746	0.873477	-0.155161	0.46323	0.555542
gene-LOC115706562	XP_030490112.2	1	uncharacterized LOC115706562	AT5G20110.1	59.8	Dynein light chain type 1 family protein		2.36211	3.55409	4.8307	2.26785	3.00148	0.59821	0.186679	0.588447	-0.0845026	0.870649	0.9207	1.0329	0.029401	0.292945	0.335138	0.530825	0.619676
gene-LOC115708278	XP_030492365.1	1	cell number regulator 6-like	AT2G45010.1	66.8	PLAC8 family protein		43.7249	41.4373	44.3012	36.9908	304.178	-0.0932389	0.588452	0.894535	-0.274054	0.105405	0.194657	0.0118037	0.957045	0.999219	2.79687	3.48784e-51	1.16599e-49
gene-LOC115706049	XP_060958532.1	1	uncharacterized LOC115706049	AT5G51410.5	78.23	LUC7 N terminus domain-containing protein		25.6125	25.7107	26.6446	24.1786	19.5161	0.0254044	0.879494	0.976004	-0.103546	0.510656	0.643756	0.0733899	0.733507	0.986341	-0.337389	0.0946944	0.145769
gene-LOC115706048	XP_030489410.2	1	conserved oligomeric Golgi complex subunit 7	AT5G51430.1	79.29	conserved oligomeric Golgi complex component-related / COG complex component-like protein		27.8744	21.6612	22.3056	27.4436	30.0271	-0.37246	0.0205575	0.159878	-0.0460588	0.736241	0.825586	-0.332349	0.116366	0.608188	0.0925358	0.600743	0.682436
gene-LOC115707101	XP_030490809.1	1	heat shock 22 kDa protein, mitochondrial	AT4G25200.1	60.54	mitochondrion-localized small heat shock protein 23.6		66.1661	1.91125	1.53503	4.06743	354.23	-5.12257	1.00092e-15	2.89428e-13	-4.07562	1.11055e-12	1.75232e-11	-5.43978	5.32844e-40	2.23648e-36	2.40099	0.000141178	0.000385815
gene-LOC115707743	XP_030491644.1	1	fructokinase-like 2, chloroplastic	AT1G69200.1	63.87	fructokinase-like protein;start_range=.,26016024		21.6452	21.0609	21.2903	9.94839	10.0065	-0.045801	0.802012	0.956879	-1.14405	1.25657e-09	1.35653e-08	-0.032196	0.888818	0.996876	-1.12432	8.65534e-07	3.19582e-06
gene-LOC115703565	XP_060958570.1	1	putative glycerol-3-phosphate transporter 1	AT3G47420.3	71.37	putative glycerol-3-phosphate transporter 1		4.84366	5.48926	6.54617	2.89886	3.17654	0.170067	0.539539	0.871854	-0.76961	0.012676	0.0335345	0.421284	0.177188	0.722041	-0.626108	0.0695474	0.111216
gene-LOC115706709	XP_030490284.2	1	putative glycerol-3-phosphate transporter 1	AT3G47420.3	72.88	putative glycerol-3-phosphate transporter 1		10.9647	10.9239	12.3592	10.3752	5.38788	-0.0108655	0.960629	0.991445	-0.102011	0.603064	0.723023	0.162736	0.500372	0.948273	-1.03866	4.83178e-05	0.000141455
gene-LOC115704744	XP_030487811.1	1	uncharacterized LOC115704744	AT4G25225.1	76.36	transmembrane protein		7.98955	7.08615	7.92175	9.44409	37.7452	-0.173945	0.698582	0.928047	0.196742	0.654805	0.764456	-0.0223331	0.966748	0.999246	2.22946	3.74986e-11	2.19204e-10
gene-LOC115705628	XP_030488882.2	1	E3 ubiquitin protein ligase RIN2	AT4G25230.3	67.85	RPM1 interacting protein 2		23.8015	24.1267	23.4836	24.5421	20.4207	0.00701325	0.965451	0.99199	0.0205904	0.894541	0.936112	-0.0265321	0.900119	0.997212	-0.243653	0.202147	0.278978
gene-LOC115705420	XP_030488615.2	1	uncharacterized LOC115705420					0	0	0	0.057893	0.354859	0	1	1	0	1	1	0	1	1	0	1	1
gene-LOC115705419	XP_030488612.2	1	receptor-like protein kinase ANXUR2	AT5G28680.2	63.06			0.123174	0.15256	0.19031	0.192083	0.160991	0	1	1	0	1	1	0	1	1	0	1	1
gene-LOC133030210	XP_060958598.1	1	probable protein phosphatase 2C 74	AT3G02750.3	42.2	Protein phosphatase 2C family protein		0.204843	0.153637	0.163672	0.346865	0.256331	0	1	1	0	1	1	0	1	1	0	1	1
gene-LOC115705067	XP_030488166.2	1	BAG family molecular chaperone regulator 7	AT5G62390.1	47.92	BCL-2-associated athanogene 7		140.451	147.529	165.12	145.162	63.3406	0.0632146	0.637405	0.911411	0.0232041	0.840867	0.900604	0.223074	0.236255	0.800569	-1.16376	3.31181e-12	2.11203e-11
gene-LOC115705102	XP_030488201.2	1	altered inheritance of mitochondria protein 3-like	AT5G09530.1	22.82	hydroxyproline-rich glycoprotein family protein		6.25121	5.84785	6.14746	5.06543	3.5721	-0.108932	0.677267	0.924788	-0.307849	0.238576	0.368166	-0.0787993	0.795409	0.993494	-0.900413	0.00501059	0.0104387
gene-LOC115705821	XP_030489124.1	1	trehalose-phosphate phosphatase A	AT5G51460.4	69.77	Haloacid dehalogenase-like hydrolase (HAD) superfamily protein		5.80275	11.7397	11.0147	20.8077	53.7755	0.940805	9.71848e-05	0.00259309	1.79258	8.43156e-17	1.98561e-15	0.836546	0.00365788	0.0687706	3.18723	1.41357e-38	3.28711e-37
gene-LOC115705586	XP_030488819.2	1	acid beta-fructofuranosidase 1, vacuolar-like	AT1G12240.1	59.44	Glycosyl hydrolases family 32 protein		16.0524	15.0561	14.9432	25.488	9.11088	-0.100635	0.597118	0.896971	0.641806	0.000158335	0.000708447	-0.115536	0.647361	0.977144	-0.833619	0.000418859	0.00106355
gene-LOC115706216	XP_030489654.2	1	monocopper oxidase-like protein SKS1	AT4G12420.2	72.11	Cupredoxin superfamily protein		5.94222	8.70906	10.7474	14.8436	18.362	0.542297	0.0166143	0.138795	1.2949	1.31208e-10	1.6365e-09	0.843142	0.00123002	0.0296707	1.61255	1.19576e-12	7.90463e-12
gene-LOC115707628	XP_030491505.2	1	chitinase 4-like	AT3G54420.1	56.1	homolog of carrot EP3-3 chitinase		0	0	0	0	0	0	1	1	0	1	1	0	1	1	0	1	1
gene-LOC115704795	XP_030487863.1	1	NAC domain-containing protein 7	AT1G12260.1	51.95	NAC 007	PK28510.1	0.641168	1.0797	0.883827	0.8424	0.956899	0.742215	0.119594	0.47428	0.377022	0.469687	0.607548	0.456936	0.405738	0.911486	0.552964	0.315055	0.405874
gene-LOC115704950	XP_030488026.2	1	probable pectinesterase/pectinesterase inhibitor 59	AT5G51490.1	60.42	Plant invertase/pectin methylesterase inhibitor superfamily		0.610411	0.794169	0.774466	0.609798	0.513472	0.395425	0.548009	0.876512	0.0212218	0.97665	0.985322	0.326284	0.655919	0.978718	-0.243276	0.770141	0.825295
gene-LOC115717615	XP_030502458.2	1	uncharacterized LOC115717615	AT1G43760.1	26.8			0	0	0	0	0	0	1	1	0	1	1	0	1	1	0	1	1
gene-LOC115705909	XP_030489235.2	1	translation initiation factor IF3-1, mitochondrial	AT1G34360.3	35.45	translation initiation factor 3 (IF-3) family protein		16.5694	17.3494	15.8642	15.3449	15.2919	0.0643279	0.734012	0.939846	-0.134945	0.457389	0.596314	-0.0840929	0.721066	0.985213	-0.136556	0.53332	0.622022
gene-LOC133035351	XP_060967287.1	1	uncharacterized LOC133035351					0	0	0	0	0	0	1	1	0	1	1	0	1	1	0	1	1
gene-LOC115705910	XP_030489238.2	1	endoglucanase 8-like	AT1G70710.1	58.91	glycosyl hydrolase 9B1		0.0155484	0	0	0.0458959	0.20281	0	1	1	0	1	1	0	1	1	0	1	1
gene-LOC115706611	XP_030490181.2	1	uncharacterized LOC115706611	AT5G51510.1	47.67	jagunal-like protein		14.7521	16.6047	16.6026	18.3131	26.0947	0.163005	0.483136	0.844192	0.281976	0.257477	0.390251	0.158216	0.555826	0.96417	0.807526	0.000853292	0.0020479
gene-LOC115704931	XP_030488010.2	1	21 kDa protein	AT5G62360.1	61.21	Plant invertase/pectin methylesterase inhibitor superfamily protein		12.0193	8.91048	4.91243	4.79908	4.12824	-0.446044	0.142335	0.519421	-1.36269	0.000254197	0.00108318	-1.31416	0.000678674	0.01826	-1.55674	4.41936e-05	0.00013023
gene-LOC115716967	XP_030501754.2	1	probable L-type lectin-domain containing receptor kinase S.7	AT5G55830.1	31.86	Concanavalin A-like lectin protein kinase family protein;start_range=.,22594655		5.64006	5.52222	3.47382	7.46318	17.901	-0.0376308	0.896536	0.979697	0.383444	0.137907	0.240574	-0.70418	0.0586104	0.436368	1.6536	2.41896e-10	1.31115e-09
gene-LOC115715595	XP_030500100.2	1	21 kDa protein-like	AT5G62360.1	65.24	Plant invertase/pectin methylesterase inhibitor superfamily protein		54.5992	79.2423	72.8944	81.7651	34.8616	0.525909	0.0118668	0.110339	0.548111	0.00776384	0.0219812	0.399093	0.116772	0.609095	-0.664403	0.0061324	0.0125457
gene-LOC115704603	XP_060967690.1	1	uncharacterized LOC115704603	AT1G06740.1	27.99	MuDR family transposase		0	0	0	0	0	0	1	1	0	1	1	0	1	1	0	1	1
gene-LOC133035965	XP_060968531.1	1	uncharacterized LOC133035965	AT4G29090.1	24.78	Ribonuclease H-like superfamily protein;start_range=.,14333528		0	0	0	0	0	0	1	1	0	1	1	0	1	1	0	1	1
gene-LOC115701986	XP_030485310.2	1	uncharacterized LOC115701986	AT4G31130.1	62.5	keratin-associated protein (DUF1218)		0.0222232	0.0449664	0	0.256036	3.27778	0	1	1	0	1	1	0	1	1	7.1935	2.87305e-06	9.98586e-06
gene-LOC115708169	XP_060958683.1	1	pectinesterase inhibitor 4-like	AT4G25250.1	37.72	Plant invertase/pectin methylesterase inhibitor superfamily protein		0	0	0	0.0252961	0.3616	0	1	1	0	1	1	0	1	1	0	1	1
gene-LOC115705624	XP_030488878.2	1	21 kDa protein	AT5G62350.1	54.65	Plant invertase/pectin methylesterase inhibitor superfamily protein		201.847	205.268	177.679	215.088	160.5	0.0169033	0.900982	0.980751	0.0667646	0.56963	0.693634	-0.194974	0.299708	0.849842	-0.345268	0.0287937	0.0508613
gene-LOC115718658	XP_060958691.1	1	DEAD-box ATP-dependent RNA helicase 3, chloroplastic-like	AT5G35050.1	38.89			0.0603005	0.141038	0.0886168	0.0802352	0.0447538	0	1	1	0	1	1	0	1	1	0	1	1
gene-LOC115718892	XP_060958708.1	1	uncharacterized LOC115718892					0	0.0645405	0	0	0	0	1	1	0	1	1	0	1	1	0	1	1
gene-LOC133036275	XP_060968973.1	1	uncharacterized LOC133036275	AT1G06740.1	27.84	MuDR family transposase		0	0	0	0	0	0	1	1	0	1	1	0	1	1	0	1	1
gene-LOC133029927	XP_060957895.1	1	uncharacterized LOC133029927	AT3G05850.1	33.33	MuDR family transposase		0	0	0	0	0	0	1	1	0	1	1	0	1	1	0	1	1
gene-LOC133030231	XP_060958722.1	1	uncharacterized LOC133030231	AT1G06740.1	27.78	MuDR family transposase		0	0	0	0	0	0	1	1	0	1	1	0	1	1	0	1	1
gene-LOC133030229	XP_060958716.1	1	uncharacterized LOC133030229	AT5G45570.2	24.55	Ulp1 protease family protein;start_range=.,18472301		0.00727575	0.0064404	0.0203059	0	0	0	1	1	0	1	1	0	1	1	0	1	1
gene-LOC133030232	XP_060958728.1	1	UMP-CMP kinase	AT4G25280.2	69.75	P-loop containing nucleoside triphosphate hydrolases superfamily protein		7.34703	6.4939	5.90831	7.41343	20.4481	-0.179841	0.534945	0.870297	-0.00913991	0.974208	0.983955	-0.318686	0.355146	0.879931	1.46637	5.64354e-08	2.40477e-07
gene-LOC115707803	XP_030491733.2	1	pentatricopeptide repeat-containing protein At4g25270, chloroplastic	AT4G25270.1	64.59	Tetratricopeptide repeat (TPR)-like superfamily protein		7.28032	6.51294	5.8102	5.27907	6.06027	-0.168822	0.481554	0.843468	-0.485172	0.0428154	0.0938156	-0.33719	0.233369	0.798036	-0.277788	0.3264	0.418061
gene-LOC133036621	XP_060969256.1	1	uncharacterized LOC133036621	AT2G17920.1	25.98	nucleic acid binding / zinc ion binding protein		0	0	0	0	0	0	1	1	0	1	1	0	1	1	0	1	1
gene-LOC133030238	XP_060958757.1	1	MYB-like transcription factor ODO1	AT4G22680.1	59.13	myb domain protein 85		3.07731	2.84852	2.44356	3.25514	25.3841	-0.119729	0.764018	0.94764	0.0481026	0.903988	0.942138	-0.343306	0.453701	0.936274	3.02122	1.32502e-16	1.15977e-15
gene-LOC133030237	XP_060958755.1	1	probable serine/threonine protein kinase IRE	AT5G62310.1	62.46	AGC (cAMP-dependent%2C cGMP-dependent and protein kinase C) kinase family protein		0.605904	0.601245	0.875682	2.09308	4.22677	-0.00900357	0.985226	0.998057	1.77569	1.04804e-06	7.21918e-06	0.536372	0.265309	0.827476	2.79714	1.44022e-16	1.25509e-15
gene-LOC115714358	XP_060958764.1	1	uncharacterized LOC115714358					0.069421	0	0.0828595	0	0.078362	0	1	1	0	1	1	0	1	1	0	1	1
gene-LOC115702369	XP_060958758.1	1	uncharacterized LOC115702369	AT5G28780.1	42.08			0.0407527	0.051682	0.0413476	0.0909434	0.00730915	0	1	1	0	1	1	0	1	1	0	1	1
gene-LOC133030243	XP_060958768.1	1	uncharacterized LOC133030243	AT1G71840.1	79.66	transducin family protein / WD-40 repeat family protein		0	0	0	0	0	0	1	1	0	1	1	0	1	1	0	1	1
gene-LOC133037117	XP_060970050.1	1	uncharacterized LOC133037117	AT3G05850.1	29.51	MuDR family transposase		0	0	0	0	0	0	1	1	0	1	1	0	1	1	0	1	1
gene-LOC133030254	XP_060958785.1	1	mitochondrial intermediate peptidase, mitochondrial	AT5G51540.1	69.53	Zincin-like metalloproteases family protein		10.5945	10.4885	10.7199	9.76577	8.15497	-0.0213454	0.90933	0.982349	-0.140099	0.439861	0.579211	0.00725442	0.977813	0.999496	-0.39308	0.0943142	0.145246
gene-LOC133030256	XP_060958786.1	1	uncharacterized LOC133030256	AT4G25290.1	56.35	DNA photolyase		7.61057	6.81508	5.34606	4.23432	3.85854	-0.166792	0.470838	0.838119	-0.868185	0.000174008	0.000771232	-0.521685	0.0613207	0.445202	-0.991581	0.000264984	0.00069628
gene-LOC133030247	XP_060958770.1	1	protein LPA2	AT5G51545.1	51.78	low psii accumulation2		31.1803	30.8616	24.0301	15.687	12.3268	-0.0190509	0.923313	0.983372	-1.01808	9.17507e-07	6.38115e-06	-0.387182	0.126782	0.632178	-1.35293	7.57655e-08	3.17864e-07
gene-LOC133030257	XP_060958789.1	1	protein EXORDIUM-like 3	AT5G51550.1	74.47	EXORDIUM like 3		260.053	286.875	269.385	227.315	83.5418	0.131383	0.464194	0.833483	-0.222984	0.172654	0.287014	0.0359478	0.874186	0.996876	-1.65646	4.27238e-15	3.37281e-14
gene-LOC133037316	XP_060970447.1	1	uncharacterized LOC133037316	AT4G29090.1	27.98	Ribonuclease H-like superfamily protein;start_range=.,14333528		0	0	0	0	0	0	1	1	0	1	1	0	1	1	0	1	1
gene-LOC115706723	XP_030490304.1	1	small ribosomal subunit protein uS10y	AT3G47370.3	90.98	Ribosomal protein S10p/S20e family protein		747.94	715.662	837.516	493.228	497.91	-0.0677414	0.615962	0.903094	-0.636296	2.69505e-07	2.05486e-06	0.15128	0.49337	0.944191	-0.596387	0.000770071	0.00186287
gene-LOC115703859	XP_030486950.2	1	chloride conductance regulatory protein ICln	AT5G62290.2	61.11	nucleotide-sensitive chloride conductance regulator (ICln) family protein		23.3955	23.1241	25.6063	17.2249	36.5029	-0.0168526	0.940371	0.986441	-0.466715	0.0432573	0.0946637	0.125014	0.644069	0.976293	0.63537	0.0308317	0.0540941
gene-LOC115703691	XP_030486788.2	1	uncharacterized LOC115703691	AT4G29090.1	25.79	Ribonuclease H-like superfamily protein;start_range=.,14333528		0	0	0	0	0.0681205	0	1	1	0	1	1	0	1	1	0	1	1
gene-LOC115704716	XP_030487774.2	1	glutamate receptor 2.7	AT2G29120.1	52.84	glutamate receptor 2.7		0.576628	0.400201	0.159978	0.0359211	0	-0.563837	0.395489	0.794132	0	1	1	0	1	1	0	1	1
gene-LOC115704803	XP_030487869.2	1	glutamate receptor 2.9	AT2G29120.1	48.35	glutamate receptor 2.7		0.84627	0.395319	0.573607	0.685322	0.443797	-1.09697	0.0435197	0.265745	-0.329994	0.504321	0.638147	-0.552383	0.303897	0.85419	-0.929677	0.12182	0.181728
gene-LOC115707999	XP_060958815.1	1	protein NSP-INTERACTING KINASE 2	AT5G51560.1	69.82	Leucine-rich repeat protein kinase family protein		72.012	62.0062	64.9663	45.9134	21.1223	-0.22333	0.110291	0.454013	-0.672434	5.1151e-08	4.39506e-07	-0.159206	0.447531	0.933751	-1.7846	4.51857e-25	6.33235e-24
gene-LOC133038013	XP_060972038.1	1	uncharacterized LOC133038013					0	0	0	0	0	0	1	1	0	1	1	0	1	1	0	1	1
gene-LOC133038181	XP_060972389.1	1	uncharacterized LOC133038181					0	0	0	0	0	0	1	1	0	1	1	0	1	1	0	1	1
gene-LOC115702123	XP_030485442.2	1	uncharacterized LOC115702123	AT5G62280.1	47.54	DUF1442 family protein (DUF1442)		0.172377	0.243024	0.142148	0.159405	0.29789	0	1	1	0	1	1	0	1	1	0	1	1
gene-LOC115705163	XP_030488270.2	1	probable GTP diphosphokinase RSH2, chloroplastic	AT1G54130.1	68.87	RELA/SPOT homolog 3		19.6876	18.5135	17.7576	14.4712	26.1915	-0.0956597	0.572165	0.889734	-0.46591	0.00381946	0.0118365	-0.157847	0.482495	0.943183	0.396974	0.0477042	0.0797305
gene-LOC115706948	XP_030490591.1	1	protein PPLZ12	AT5G51570.1	81.12	SPFH/Band 7/PHB domain-containing membrane-associated protein family		20.2282	20.0465	19.3264	22.6879	208.835	-0.0182293	0.927321	0.983991	0.138726	0.463074	0.601519	-0.0762168	0.763853	0.991551	3.35515	5.65673e-81	3.99802e-79
gene-LOC115705522	XP_030488726.2	1	uncharacterized LOC115705522	AT1G12380.1	57.47	hypothetical protein		15.787	18.3319	15.8355	17.609	5.32438	0.209001	0.244033	0.661477	0.136518	0.415483	0.555329	-0.00411417	0.985505	0.999496	-1.58364	1.74225e-10	9.61181e-10
gene-LOC115707327	XP_030491117.1	1	uncharacterized LOC115707327	AT3G09110.1	31.12	hypothetical protein (DUF674)		0.0998919	0.215888	0.24499	0.585442	0.723699	0	1	1	0	1	1	0	1	1	0	1	1
gene-LOC115705884	XP_030489193.2	1	lachrymatory-factor synthase-like	AT2G25770.2	54.19	Polyketide cyclase/dehydrase and lipid transport superfamily protein		0	0	0	0.0481444	2.26296	0	1	1	0	1	1	0	1	1	0	1	1
gene-LOC115703693	XP_060958847.1	1	peptidyl-prolyl cis-trans isomerase FKBP53	AT4G25340.1	46.06	FK506 BINDING PROTEIN 53		34.0246	30.5419	37.2172	32.84	74.2403	-0.164238	0.322597	0.742827	-0.0774161	0.605073	0.724325	0.118223	0.620278	0.973456	1.10968	4.6894e-10	2.46802e-09
gene-LOC115707804	XP_030491734.1	1	enolase	AT2G36530.1	87.87	Enolase		43.832	45.0918	43.915	61.7597	40.2203	0.0329805	0.840864	0.966987	0.468886	0.000868522	0.00323182	-0.00826245	0.968809	0.999246	-0.139862	0.471454	0.563785
gene-LOC115708330	XP_030492430.2	1	nudix hydrolase 20, chloroplastic	AT5G19460.1	62.87	nudix hydrolase homolog 20		15.5118	19.6309	15.9327	9.80402	12.1932	0.333284	0.0704674	0.350209	-0.689508	0.000556624	0.0021773	0.0330183	0.888761	0.996876	-0.35446	0.118029	0.176808
gene-LOC115706279	XP_030489730.1	1	3-hydroxyisobutyryl-CoA hydrolase-like protein 3, mitochondrial	AT4G13360.1	75.91	ATP-dependent caseinolytic (Clp) protease/crotonase family protein		73.9161	69.0816	74.2682	83.321	84.5433	-0.104619	0.491578	0.84883	0.148043	0.277095	0.412666	-0.00377277	0.985185	0.999496	0.1813	0.327455	0.419079
gene-LOC115704140	XP_030487219.1	1	strigolactone esterase D14-like	AT3G24420.1	59.93	alpha/beta-Hydrolases superfamily protein		14.8272	7.54205	6.41966	1.28127	4.16465	-0.983519	3.52199e-05	0.00110074	-3.56282	2.65799e-30	1.59313e-28	-1.21969	5.2778e-05	0.00212492	-1.84382	1.04911e-10	5.87817e-10
gene-LOC115707452	XP_030491277.2	1	fe-S cluster assembly factor HCF101, chloroplastic	AT3G24430.1	79.43	ATP binding protein		37.9196	60.5563	45.5885	20.3641	16.2489	0.668404	0.000107731	0.00284733	-0.920889	2.63998e-08	2.35389e-07	0.255424	0.339096	0.874485	-1.23806	5.74149e-09	2.72171e-08
gene-LOC115703700	XP_060957647.1	1	uncharacterized LOC115703700	AT4G29090.1	30	Ribonuclease H-like superfamily protein;start_range=.,14333528		0.123324	0.081239	0.129431	0.135852	0.0307162	0	1	1	0	1	1	0	1	1	0	1	1
gene-LOC115706984	XP_030490631.2	1	subtilisin-like protease SBT3.4	AT1G71950.1	56.25	Proteinase inhibitor%2C propeptide		0.560575	0.245782	0.19328	0.438396	8.15844	0	1	1	0	1	1	0	1	1	3.83034	3.01613e-12	1.9317e-11
gene-LOC115705198	XP_030488315.2	1	VIN3-like protein 1	AT3G24440.1	48.21	Fibronectin type III domain-containing protein		19.6916	20.0397	23.6338	25.7614	81.355	0.0172282	0.916135	0.982713	0.364328	0.0106297	0.0288779	0.252319	0.225153	0.788669	2.03015	2.0939e-23	2.70429e-22
gene-LOC115703701	XP_030486798.2	1	uncharacterized mitochondrial protein AtMg00810-like	AT4G23160.3	45.23	cysteine-rich RECEPTOR-like kinase;start_range=.,12131325	PK03054.1	0	0	0	0	0	0	1	1	0	1	1	0	1	1	0	1	1
gene-LOC115705872	XP_030489179.2	1	uncharacterized LOC115705872	AT5G19590.2	70.15	DUF538 family protein (Protein of unknown function%2C DUF538)		152.613	172.825	170.232	155.433	180.319	0.17201	0.238717	0.656033	-0.00640233	0.962339	0.977047	0.144685	0.465785	0.940229	0.227187	0.182728	0.255916
gene-LOC115704622	XP_030487684.2	1	protein SODIUM POTASSIUM ROOT DEFECTIVE 2	AT3G24450.1	57.45	Heavy metal transport/detoxification superfamily protein		6.02045	12.3647	10.7445	5.59191	3.53129	1.02515	0.000679072	0.0129805	-0.143638	0.677745	0.7824	0.819369	0.0247565	0.261447	-0.775915	0.086419	0.134576
gene-LOC115703703	XP_030486799.2	1	uncharacterized mitochondrial protein AtMg00810-like	AT4G23160.3	37.5	cysteine-rich RECEPTOR-like kinase;start_range=.,12131325	PK03054.1	0	0	0	0	0	0	1	1	0	1	1	0	1	1	0	1	1
gene-LOC133030255	XP_060958887.1	1	uncharacterized LOC133030255	AT1G06740.1	26.03	MuDR family transposase		0	0	0	0	0	0	1	1	0	1	1	0	1	1	0	1	1
gene-LOC133039875	XP_060974922.1	1	uncharacterized LOC133039875					0	0	0	0	0	0	1	1	0	1	1	0	1	1	0	1	1
gene-LOC133029042	XP_060959251.1	1	uncharacterized LOC133029042	AT1G31150.2	25.1	K-box region protein (DUF1985)		0	0	0	0.0681461	0.0921485	0	1	1	0	1	1	0	1	1	0	1	1
gene-LOC115705157	XP_030488257.2	1	probable ADP-ribosylation factor GTPase-activating protein AGD14	AT4G13350.2	46.3	NSP (nuclear shuttle protein)-interacting GTPase		41.6678	39.7737	40.5549	49.0315	296.572	-0.0759887	0.628752	0.906833	0.202824	0.129674	0.229607	-0.051666	0.803073	0.993728	2.81788	4.67637e-64	2.18052e-62
gene-LOC115705158	XP_030488261.2	1	uncharacterized LOC115705158	AT3G24460.2	69.83	Serinc-domain containing serine and sphingolipid biosynthesis protein		6.43357	3.08122	4.26577	2.73016	44.9712	-1.08378	4.45659e-05	0.00135498	-1.23762	5.22571e-06	3.18412e-05	-0.646616	0.0282382	0.284057	2.77394	1.03089e-42	2.7336e-41
gene-LOC133030706	XP_060959571.1	1	uncharacterized LOC133030706	AT4G29090.1	26.55	Ribonuclease H-like superfamily protein;start_range=.,14333528		0	0	0	0	0.102006	0	1	1	0	1	1	0	1	1	0	1	1
gene-LOC133030879	XP_060959974.1	1	uncharacterized LOC133030879	AT2G40095.2	36.13	Alpha/beta hydrolase related protein		0.144618	0	0	0	1.17444	0	1	1	0	1	1	0	1	1	0	1	1
gene-LOC115708118	XP_030492174.1	1	uncharacterized LOC115708118	AT5G39600.1	81.1	39S ribosomal protein		17.2445	13.7338	17.3283	11.0382	13.6353	-0.327995	0.232269	0.647233	-0.673012	0.0190979	0.0475848	-0.00366691	0.990414	0.999496	-0.347368	0.266765	0.353717
gene-LOC115705196	XP_030488312.2	1	leucine-rich repeat extensin-like protein 4	AT3G24480.1	68.82	Leucine-rich repeat (LRR) family protein;start_range=.,8901154		126.735	128.544	98.3257	142.134	122.097	0.00960928	0.961859	0.991445	0.140462	0.719089	0.813695	-0.381113	0.173324	0.717795	-0.0722512	0.771198	0.826293
gene-LOC115705227	XP_060958893.1	1	coatomer subunit beta'-1	AT1G79990.1	77.22	coatomer subunit beta-2		15.3547	17.1278	17.8334	27.9713	25.8457	0.149057	0.377248	0.781059	0.841711	6.19852e-09	6.06569e-08	0.205414	0.34837	0.876254	0.736865	8.89206e-05	0.000249774
gene-LOC115703621	XP_030486717.1	1	probable sulfate transporter 3.5	AT5G19600.1	67.2	sulfate transporter 3%3B5		1.10136	0.945291	0.574024	2.45134	5.66237	-0.241986	0.638712	0.91153	1.13873	0.00513594	0.0153014	-0.952448	0.124006	0.626333	2.34954	9.32873e-11	5.25806e-10
gene-LOC133031048	XP_060960379.1	1	uncharacterized LOC133031048	AT4G29090.1	24.45	Ribonuclease H-like superfamily protein;start_range=.,14333528		0	0	0	0	0	0	1	1	0	1	1	0	1	1	0	1	1
gene-LOC115705510	XP_030488713.2	1	histone acetyltransferase of the MYST family 2	AT5G64610.1	90.02	histone acetyltransferase of the MYST family 1		41.2186	38.9872	41.6612	34.7893	81.3665	-0.0875364	0.561241	0.883772	-0.26889	0.0509007	0.108223	0.0046352	0.98213	0.999496	0.966516	9.37511e-09	4.33656e-08
gene-LOC115705414	XP_030488608.2	1	protein VASCULAR ASSOCIATED DEATH 1, chloroplastic	AT1G02120.1	47.93	GRAM domain family protein		12.0021	15.0793	13.382	21.3061	30.713	0.305483	0.12433	0.482682	0.796025	8.87415e-06	5.21394e-05	0.122544	0.617739	0.972544	1.32976	1.94001e-10	1.06472e-09
gene-LOC115705903	XP_030489226.2	1	uncharacterized LOC115705903	AT5G66810.1	59.43	Ran-binding protein in the microtubule-organising centre protein		9.65614	8.85895	9.12584	9.78478	9.12889	-0.132305	0.509469	0.85816	-0.00305622	0.987202	0.991805	-0.092326	0.726011	0.985213	-0.0948317	0.68014	0.751469
gene-LOC115705034	XP_030488129.2	1	probable sulfate transporter 3.4	AT3G15990.1	59.21	sulfate transporter 3%3B4		0.614329	0.61668	0.556582	0.391089	2.11319	-0.00501871	0.992416	0.998352	-0.646893	0.254822	0.386907	-0.159774	0.779967	0.992996	1.77266	1.96347e-05	6.09515e-05
gene-LOC133031183	XP_060960734.1	1	glycine-rich protein 5-like					6.5165	7.95209	4.73804	1.19351	3.74e-06	0.28148	0.462271	0.832626	-2.48127	1.25519e-05	7.14611e-05	-0.473013	0.380719	0.897852	-8.37693	7.88477e-08	3.30101e-07
gene-LOC115705472	XP_030488669.2	1	trihelix transcription factor ENAP1	AT3G24490.1	46.78	Alcohol dehydrogenase transcription factor Myb/SANT-like family protein	PK19589.1	20.8361	20.9211	20.6896	21.0633	17.9653	-0.017814	0.921012	0.982761	-0.010381	0.95132	0.970434	-0.0358143	0.874918	0.996876	-0.226125	0.28697	0.376173
gene-LOC115703719	XP_030486813.2	1	uncharacterized LOC115703719	AT1G69430.1	31.44	Son of sevenless protein		0.230591	0.358286	0.146935	0.149948	1.36287	0	1	1	0	1	1	0	1	1	0	1	1
gene-LOC115705470	XP_030488667.2	1	DNA mismatch repair protein MSH7	AT3G24495.1	60.77	MUTS homolog 7		9.19595	8.46835	9.71087	4.24167	36.3935	-0.128341	0.530319	0.867282	-1.13966	9.38223e-08	7.73429e-07	0.0657355	0.790387	0.993364	1.96733	2.02536e-20	2.232e-19
gene-LOC133031749	XP_060961507.1	1	uncharacterized LOC133031749					0	0	0	0	0	0	1	1	0	1	1	0	1	1	0	1	1
gene-LOC115719300	XP_060974931.1	1	uncharacterized LOC115719300					0	0	0	0	0	0	1	1	0	1	1	0	1	1	0	1	1
gene-LOC115720544	XP_030505548.2	1	uncharacterized LOC115720544					0	0	0	0	0	0	1	1	0	1	1	0	1	1	0	1	1
gene-LOC133031989	XP_060961912.1	1	protein FAR1-RELATED SEQUENCE 5-like	AT4G38180.1	29.44	FAR1-related sequence 5		0	0	0	0	0	0	1	1	0	1	1	0	1	1	0	1	1
gene-LOC115707742	XP_030491643.2	1	multiprotein-bridging factor 1c	AT3G24500.1	79.73	multiprotein bridging factor 1C		10.1938	0.92217	1.41836	2.05941	210.18	-3.46665	6.7193e-12	9.31984e-10	-2.34445	2.32494e-08	2.08051e-07	-2.86663	2.73693e-09	3.42913e-07	4.3441	1.22595e-66	6.09647e-65
gene-LOC115705056	XP_030488156.2	1	aldehyde dehydrogenase family 2 member C4	AT3G24503.1	72.46	aldehyde dehydrogenase 2C4		0.0220213	0.0199916	0	0.178708	0.264998	0	1	1	0	1	1	0	1	1	0	1	1
gene-LOC115707294	XP_030491064.1	1	aldehyde dehydrogenase family 2 member C4	AT3G24503.1	71.54	aldehyde dehydrogenase 2C4		5.11139	3.77285	3.22848	4.17504	19.3084	-0.442528	0.155104	0.539232	-0.311004	0.298115	0.435959	-0.675256	0.0573534	0.431603	1.90289	4.53333e-08	1.95115e-07
gene-LOC115705373	XP_060958953.1	1	aldehyde dehydrogenase family 2 member C4	AT3G24503.1	69.38	aldehyde dehydrogenase 2C4		0.169085	0.0898508	0	0.178028	0.141362	0	1	1	0	1	1	0	1	1	0	1	1
gene-LOC133039889	XP_060974946.1	1	protein EXPORTIN 1B-like	AT5G17020.1	79.1	exportin 1A		0	0	0	0	0	0	1	1	0	1	1	0	1	1	0	1	1
gene-LOC115705374	XP_030488560.2	1	aldehyde dehydrogenase family 2 member C4-like	AT3G24503.1	71.98	aldehyde dehydrogenase 2C4		2.89206	3.01417	2.03809	5.32489	1.59131	0.0511651	0.88662	0.978065	0.848611	0.0079421	0.0224124	-0.51583	0.246348	0.810846	-0.891533	0.0514448	0.0851265
gene-LOC115707654	XP_030491537.2	1	FRIGIDA-like protein 4a	AT3G22440.1	31.13	FRIGIDA-like protein		9.29999	11.476	9.42666	7.52543	60.21	0.293911	0.145249	0.522891	-0.331225	0.109894	0.201079	0.00632429	0.981007	0.999496	2.67773	7.13955e-43	1.90445e-41
gene-LOC115703716	XP_030486810.2	1	uncharacterized LOC115703716	AT2G25735.1	46.94	hypothetical protein		3.28895	3.50476	2.84637	7.27989	44.9403	0	1	1	1.11633	0.151937	0.259472	0	1	1	3.80375	8.72102e-14	6.25738e-13
gene-LOC115705433	XP_030488629.1	1	casein kinase 1-like protein HD16	AT3G03940.1	67.43	Protein kinase family protein		8.27718	11.7485	11.2504	13.8312	14.7036	0.489937	0.00943614	0.0938191	0.712575	4.75899e-05	0.000241191	0.411237	0.0777368	0.503026	0.810283	0.00014155	0.000386716
gene-LOC115706397	XP_030489897.1	1	small ribosomal subunit protein uS8z/uS8w	AT5G59850.1	99.23	Ribosomal protein S8 family protein		204.481	210.244	261.323	125.821	187.235	0.0349023	0.808675	0.958011	-0.730784	4.80828e-08	4.14796e-07	0.343354	0.096898	0.55869	-0.137234	0.494097	0.585017
gene-LOC115707451	XP_030491276.1	1	uncharacterized LOC115707451	AT4G13270.1	54.25	Late embryogenesis abundant (LEA) hydroxyproline-rich glycoprotein family		9.31848	8.54977	9.70426	7.21201	21.6245	-0.132323	0.488997	0.847678	-0.392491	0.0368163	0.0828367	0.0481099	0.836641	0.995797	1.19906	9.41095e-10	4.80641e-09
gene-LOC133033461	XP_060964178.1	1	uncharacterized LOC133033461	AT5G48050.1	22.96	Copia-like polyprotein/retrotransposon		0	0	0	0	0	0	1	1	0	1	1	0	1	1	0	1	1
gene-LOC115703584	XP_060958975.1	1	ras-related protein RHN1	AT5G45130.1	66.5	Ras small GTP-binding family protein		0.893682	0.894451	1.31111	23.9586	3.59128	0	1	1	4.69944	9.67638e-30	5.60516e-28	0	1	1	1.98626	0.00354874	0.00760226
gene-LOC133033509	XP_060964307.1	1	uncharacterized LOC133033509	AT4G29090.1	24.45	Ribonuclease H-like superfamily protein;start_range=.,14333528		0	0	0	0	0.110688	0	1	1	0	1	1	0	1	1	0	1	1
gene-LOC133030333	XP_060958980.1	1	uncharacterized LOC133030333	AT3G29300.2	46.61	transmembrane protein;start_range=.,11247011		17.3346	13.2998	16.7313	4.28877	3.36524	-0.39003	0.0913223	0.409256	-2.03752	2.80558e-13	4.77985e-12	-0.0651654	0.807968	0.993917	-2.3749	1.27415e-13	9.00178e-13
gene-LOC133030330	XP_060958976.1	1	uncharacterized LOC133030330	AT4G32350.3	63.89	Regulator of Vps4 activity in the MVB pathway protein		19.6416	18.2803	19.6355	18.5194	23.1301	-0.113104	0.537963	0.871174	-0.109696	0.525551	0.657348	-0.0129822	0.956435	0.999165	0.219547	0.288157	0.377563
gene-LOC115703726	XP_060958984.1	1	G-type lectin S-receptor-like serine/threonine-protein kinase CES101	AT3G16030.6	38.51	lectin protein kinase family protein;start_range=.,5439609		2.50089	2.683	3.00741	4.51616	0.814559	0.0903783	0.763069	0.947303	0.825471	0.00217776	0.00725863	0.255685	0.439205	0.929072	-1.64093	0.000113927	0.000315523
gene-LOC115706324	XP_030489799.2	1	probable ubiquitin-conjugating enzyme E2 37	AT3G24515.1	53.62	ubiquitin-conjugating enzyme 37		1.63796	1.64553	2.26008	2.15294	11.485	0.00810717	0.9857	0.998214	0.379552	0.349589	0.489742	0.466946	0.32476	0.867113	2.8043	1.13669e-20	1.2706e-19
gene-LOC133033553	XP_060964389.1	1	uncharacterized LOC133033553	AT4G10200.2	36.36			0	0	0	0	0	0	1	1	0	1	1	0	1	1	0	1	1
gene-LOC115705481	XP_060958993.1	1	kinesin-like protein KIN-13B	AT3G16060.1	61.67	ATP binding microtubule motor family protein		13.3593	20.2079	19.2757	17.4648	11.7286	0.589613	0.000276405	0.00616055	0.363082	0.0218718	0.0533566	0.518323	0.0149655	0.188914	-0.203464	0.315815	0.406678
gene-LOC115707235	XP_030490981.2	1	heat stress transcription factor C-1	AT4G17750.1	46.58	heat shock factor 1	PK22356.1	14.6063	27.6326	26.601	10.6712	11.6921	0.910791	1.52827e-06	7.20475e-05	-0.480982	0.020865	0.0513066	0.853827	0.000321328	0.00971747	-0.335751	0.169974	0.240872
gene-LOC115704335	XP_060958998.1	1	indole-3-pyruvate monooxygenase YUCCA2	AT4G13260.1	63.49	Flavin-binding monooxygenase family protein		0.785573	0.615687	0.584098	0.704548	0.550138	-0.347281	0.530323	0.867282	-0.167543	0.761899	0.844044	-0.439713	0.462631	0.939196	-0.542529	0.398908	0.492246
gene-LOC115704769	XP_030487834.2	1	uncharacterized LOC115704769	AT1G15260.1	27.36	LOW protein: ATP-dependent RNA helicase-like protein		0.960471	0.846852	0.742457	0.812698	0.987845	-0.177478	0.761582	0.946765	-0.250347	0.680458	0.784116	-0.373251	0.595826	0.968773	0.0105785	0.98689	0.990144
gene-LOC115704901	XP_030487973.2	1	transcription repressor OFP8	AT5G19650.1	71.64	ovate family protein 8		10.5341	12.9169	11.4565	11.5412	4.77943	0.287216	0.227014	0.640439	0.103297	0.664731	0.771764	0.10857	0.709043	0.981717	-1.15901	0.000291178	0.00075987
gene-LOC115705089	XP_030488186.2	1	polyol transporter 5	AT3G18830.1	53.96	polyol/monosaccharide transporter 5		0.500425	0.719688	0.575721	1.43562	17.1532	0.517531	0.491777	0.84883	1.50318	0.021364	0.0523322	0	1	1	5.08095	1.76459e-38	4.08221e-37
gene-LOC115708170	XP_030492241.2	1	polyol transporter 5	AT3G18830.1	57.3	polyol/monosaccharide transporter 5		0.496968	0.789918	0.584125	0.472702	1.4714	0.674166	0.337937	0.754201	-0.0746429	0.926841	0.955686	0.227746	0.782504	0.992996	1.56761	0.0206218	0.037608
gene-LOC115704823	XP_060959021.1	1	uncharacterized LOC115704823	AT5G19540.2	71.46	thermosome subunit gamma		22.9367	25.0236	20.3926	13.5095	11.7242	0.119094	0.526955	0.865875	-0.789463	3.28759e-05	0.000172417	-0.179529	0.48572	0.943183	-0.983265	3.57736e-05	0.000106679
gene-LOC133030354	XP_060959029.1	1	uncharacterized LOC133030354	AT3G24530.1	74.69	AAA-type ATPase family protein / ankyrin repeat family protein		24.633	17.1718	14.5887	24.6898	20.1347	-0.52878	0.00333332	0.0436373	-0.0221883	0.891025	0.933986	-0.767903	0.00077119	0.0203577	-0.306353	0.130099	0.192305
gene-LOC133033810	XP_060964805.1	1	uncharacterized LOC133033810					0	0	0	0	0	0	1	1	0	1	1	0	1	1	0	1	1
gene-LOC115705686	XP_030488945.2	1	probable chlorophyll(ide) b reductase NYC1, chloroplastic	AT4G13250.1	74.29	NAD(P)-binding Rossmann-fold superfamily protein		41.402	70.6763	52.4565	26.0823	14.9487	0.762949	1.05233e-05	0.000396883	-0.690888	8.43476e-07	5.93079e-06	0.329686	0.250921	0.813264	-1.4852	2.64005e-12	1.69811e-11
gene-LOC115705504	XP_030488707.2	1	proline-rich receptor-like protein kinase PERK1	AT4G34440.2	55.18	Protein kinase superfamily protein		48.8798	49.2523	42.7422	50.8965	40.6256	0.00157486	0.991947	0.998352	0.0336626	0.805783	0.875798	-0.206871	0.401602	0.908325	-0.283821	0.170277	0.241149
gene-LOC115705849	XP_030489155.2	1	subtilisin-like protease SBT6.1	AT5G19660.1	76.07	SITE-1 protease		9.92882	8.27966	8.25059	7.42176	43.3139	-0.268633	0.131328	0.498769	-0.440455	0.0105261	0.0286233	-0.276218	0.234099	0.798688	2.11021	1.89967e-29	3.11441e-28
gene-LOC115706099	XP_030489483.2	1	uncharacterized LOC115706099	AT3G24560.2	56.64	Adenine nucleotide alpha hydrolases-like superfamily protein		5.99323	6.42278	6.87016	4.46251	6.49561	0.0913029	0.619314	0.903642	-0.432706	0.0171921	0.0434407	0.184145	0.420484	0.918961	0.0848919	0.685565	0.756535
gene-LOC115706100	XP_030489485.1	1	uncharacterized LOC115706100	AT3G24570.1	71.24	Peroxisomal membrane 22 kDa (Mpv17/PMP22) family protein		10.3724	11.7224	10.3279	5.53646	177.106	0.168523	0.562932	0.884466	-0.931374	0.00244367	0.00802255	-0.0144195	0.962876	0.999246	4.08004	5.53239e-94	5.31109e-92
gene-LOC115706156	XP_060959045.1	1	pentatricopeptide repeat-containing protein At5g25630	AT5G21222.4	61.78	protein kinase family protein		8.74597	8.08618	7.39298	5.46788	3.27449	-0.123955	0.555201	0.880523	-0.689637	0.00163327	0.00563532	-0.242947	0.341806	0.874678	-1.41673	1.76626e-07	7.12539e-07
gene-LOC115704898	XP_030487971.2	1	large ribosomal subunit protein eL8y	AT3G62870.1	87.21	Ribosomal protein L7Ae/L30e/S12e/Gadd45 family protein		357.437	324.296	378.618	257.428	248.659	-0.151996	0.286848	0.706809	-0.467684	0.000410585	0.00166334	0.0583975	0.780783	0.992996	-0.542259	0.00298463	0.00648435
gene-LOC115705189	XP_030488301.2	1	chloroplast processing peptidase	AT3G24590.1	63.67	plastidic type i signal peptidase 1		38.4798	49.4444	41.9445	19.9342	21.1572	0.354895	0.037252	0.238353	-0.974292	3.97633e-08	3.46664e-07	0.115336	0.595835	0.968773	-0.876653	3.3688e-05	0.000100807
gene-LOC115705188	XP_030488299.1	1	uncharacterized LOC115705188	AT3G24605.1	44.52	late embryogenesis abundant protein%2C group 2		16.5233	15.8117	14.721	14.3787	7.90289	-0.0711313	0.715564	0.932797	-0.226865	0.217959	0.34291	-0.177627	0.467826	0.941066	-1.07913	6.8653e-06	2.27895e-05
gene-LOC115706707	XP_030490280.1	1	expansin-A4	AT2G39700.1	85.66	expansin A4		14.5995	18.9955	19.7166	36.7194	6.27935	0.365918	0.126963	0.487937	1.2968	8.13769e-10	9.09209e-09	0.414553	0.15423	0.687456	-1.23691	7.34934e-05	0.000209122
gene-LOC115705142	XP_030488244.2	1	telomere repeat-binding protein 4	AT5G13820.2	48.96	telomeric DNA binding protein 1	PK21687.3	10.4724	9.77905	10.1918	15.4651	40.5823	-0.107401	0.587009	0.894179	0.538821	0.00292668	0.00939454	-0.0503268	0.837251	0.995797	1.93733	1.78714e-19	1.85556e-18
gene-LOC133033845	XP_060964845.1	1	uncharacterized LOC133033845					0	0	0	0	0	0	1	1	0	1	1	0	1	1	0	1	1
gene-LOC115706782	XP_030490376.1	1	uncharacterized LOC115706782	AT5G13830.1	74.24	FtsJ-like methyltransferase family protein		14.5188	9.77887	10.9753	13.3786	12.1597	-0.578618	0.0424937	0.26114	-0.148478	0.581919	0.704161	-0.406592	0.250601	0.812608	-0.265285	0.428785	0.522115
gene-LOC115706781	XP_030490375.1	1	protein FIZZY-RELATED 3	AT5G13840.2	84.62	FIZZY-related 3		30.7303	35.466	37.3935	14.317	11.968	0.198735	0.225429	0.638977	-1.12778	3.82802e-11	5.07912e-10	0.271614	0.206828	0.76722	-1.37482	3.86799e-11	2.25668e-10
gene-LOC115706462	XP_060959087.1	1	actin-related protein 5	AT3G12380.1	74.41	actin-related protein 5		18.228	19.1919	18.4315	19.7722	24.6489	0.0712749	0.667843	0.921062	0.110569	0.472845	0.610426	0.0263649	0.903027	0.997212	0.421534	0.0285494	0.0504946
gene-LOC115715734	XP_030500261.2	1	mitochondrial import inner membrane translocase subunit TIM22-4	AT3G10110.4	69.33	Mitochondrial import inner membrane translocase subunit Tim17/Tim22/Tim23 family protein		0.0288571	0.0283953	0	0.0475976	0.097235	0	1	1	0	1	1	0	1	1	0	1	1
gene-LOC133033866	XP_060964920.1	1	uncharacterized LOC133033866	AT4G29090.1	27.24	Ribonuclease H-like superfamily protein;start_range=.,14333528		0	0	0	0	0.05431	0	1	1	0	1	1	0	1	1	0	1	1
gene-LOC115706227	XP_030489665.1	1	small polypeptide DEVIL 11	AT2G39705.1	64.86	ROTUNDIFOLIA like 8		3.92403	5.08551	6.28866	6.05766	13.8917	0.364415	0.243165	0.66045	0.600077	0.048316	0.103787	0.66971	0.0711941	0.48024	1.80745	1.52067e-10	8.42305e-10
gene-LOC115707449	XP_030491272.1	1	peptidyl-prolyl cis-trans isomerase FKBP20-1	AT3G55520.3	79.43	FKBP-like peptidyl-prolyl cis-trans isomerase family protein		50.2462	52.0794	52.1326	65.9008	81.0962	0.047611	0.788372	0.953748	0.355584	0.0164151	0.0417454	0.0276414	0.903687	0.997278	0.657599	0.00038317	0.000979589
gene-LOC115706206	XP_030489636.2	1	E3 ubiquitin-protein ligase SDIR1	AT3G55530.1	77.7	RING/U-box superfamily protein		26.9123	23.4032	23.9936	24.6685	65.4813	-0.21005	0.256263	0.67488	-0.152959	0.374642	0.51551	-0.177623	0.474426	0.942022	1.26802	2.06698e-11	1.24226e-10
gene-LOC115707119	XP_030490835.2	1	aspartic proteinase PCS1	AT2G39710.1	71.33	Eukaryotic aspartyl protease family protein		6.2395	3.74122	3.01638	8.02738	1.96501	-0.747482	0.0066225	0.0728345	0.339811	0.13679	0.23897	-1.06053	0.000781633	0.0205659	-1.6793	3.30658e-07	1.2809e-06
gene-LOC133033909	XP_060964971.1	1	uncharacterized mitochondrial protein AtMg00310-like	AT4G29090.1	41.01	Ribonuclease H-like superfamily protein;start_range=.,14333528		0	0	0	0	0	0	1	1	0	1	1	0	1	1	0	1	1
gene-LOC115703600	XP_030486690.2	1	glycerol-3-phosphate acyltransferase 5	AT3G11430.1	73.54	glycerol-3-phosphate acyltransferase 5		0.0185325	0.111796	0	0.0304968	1.07566	0	1	1	0	1	1	0	1	1	5.84122	0.000435838	0.0011037
gene-LOC115706937	XP_030490575.2	1	pumilio homolog 1	AT2G29200.2	54.56	pumilio 1		29.6774	29.9556	32.0435	25.4113	15.3754	0.0050895	0.971869	0.994065	-0.24631	0.0648144	0.131408	0.0992812	0.643212	0.976293	-0.96486	4.1525e-07	1.58999e-06
gene-LOC115706938	XP_030490576.2	1	protein SRG1	AT1G17020.1	44.66	senescence-related gene 1		1.63568	2.63074	1.00389	5.73716	2.72302	0.677038	0.117317	0.469353	1.78116	6.70599e-07	4.80526e-06	-0.695647	0.226236	0.789991	0.717919	0.13667	0.200596
gene-LOC115703769	XP_030486862.2	1	thaumatin-like protein	AT5G02140.1	63.18	Pathogenesis-related thaumatin superfamily protein		0	0	0	0	0.741432	0	1	1	0	1	1	0	1	1	0	1	1
gene-LOC133034024	XP_060965048.1	1	protein FAR1-RELATED SEQUENCE 5-like	AT4G15090.5	26.35	FRS (FAR1 Related Sequences) transcription factor family		0	0	0	0	0	0	1	1	0	1	1	0	1	1	0	1	1
gene-LOC133039899	XP_060974978.1	1	uncharacterized LOC133039899					0	0	0	0	0	0	1	1	0	1	1	0	1	1	0	1	1
gene-LOC133034069	XP_060965080.1	1	uncharacterized LOC133034069					0	0	0	0	0	0	1	1	0	1	1	0	1	1	0	1	1
gene-LOC115708228	XP_030492307.2	1	L-type lectin-domain containing receptor kinase S.4	AT3G55550.1	61.88			4.89649	5.53153	4.4894	6.7275	1.9105	0.167875	0.505971	0.857063	0.434279	0.0609648	0.125187	-0.134204	0.647867	0.977144	-1.37387	4.08984e-05	0.000121037
gene-LOC115708105	XP_030492155.2	1	ribulose bisphosphate carboxylase/oxygenase activase, chloroplastic	AT2G39730.1	82.16	rubisco activase		687.116	1156.36	861.406	254.236	134.38	0.744274	0.000140254	0.00356109	-1.45603	8.18648e-22	2.79279e-20	0.316053	0.633625	0.975559	-2.36951	4.31733e-23	5.45808e-22
gene-LOC133034168	XP_060965199.1	1	uncharacterized LOC133034168					0	0	0	0	0	0	1	1	0	1	1	0	1	1	0	1	1
gene-LOC115707283	XP_030491054.2	1	LOB domain-containing protein 33	AT5G06080.1	75.93		PK25573.1	0.0193559	0	0.125266	0.0317658	0.0648566	0	1	1	0	1	1	0	1	1	0	1	1
gene-LOC133034241	XP_060965279.1	1	uncharacterized mitochondrial protein AtMg00310-like	AT4G29090.1	34.29	Ribonuclease H-like superfamily protein;start_range=.,14333528		0	0	0	0	0	0	1	1	0	1	1	0	1	1	0	1	1
gene-LOC115705643	XP_060959163.1	1	AT-hook motif nuclear-localized protein 15	AT3G55560.1	49.01	AT-hook protein of GA feedback 2		1.94127	5.80165	6.16591	7.19833	6.94397	1.57187	5.36594e-08	3.49056e-06	1.86542	3.20823e-12	4.799e-11	1.65345	2.6483e-07	1.9761e-05	1.82165	2.58622e-09	1.26991e-08
gene-LOC115704658	XP_030487718.2	1	ARF guanine-nucleotide exchange factor GNOM	AT1G13980.2	76.8	sec7 domain-containing protein		8.73802	7.93133	7.52941	7.95312	11.0472	-0.148467	0.426941	0.812503	-0.163951	0.318142	0.457596	-0.234915	0.311886	0.858106	0.318412	0.0937636	0.144559
gene-LOC115707648	XP_030491527.2	1	ARF guanine-nucleotide exchange factor GNOM	AT1G13980.2	82.87	sec7 domain-containing protein		18.4544	17.0095	16.8565	16.4365	23.418	-0.127921	0.438041	0.818125	-0.180813	0.197445	0.318682	-0.147851	0.539184	0.958024	0.323914	0.0824357	0.12927
gene-LOC115703626	XP_030486724.2	1	thylakoid lumenal 15 kDa protein 1, chloroplastic	AT2G44920.2	82.76	Tetratricopeptide repeat (TPR)-like superfamily protein		104.51	125.12	108.683	46.3188	40.9444	0.252783	0.112136	0.457234	-1.2032	7.56212e-17	1.78818e-15	0.0417854	0.857644	0.99684	-1.367	3.21657e-13	2.20818e-12
gene-LOC115705582	XP_030488812.1	1	uncharacterized LOC115705582	AT3G11420.1	55.47	beta-1%2C3-N-acetylglucosaminyltransferase lunatic protein%2C putative (DUF604)		5.59807	6.1738	6.30274	11.9669	9.32866	0.131371	0.595634	0.896942	1.07148	8.08001e-08	6.74454e-07	0.157886	0.610653	0.970538	0.71945	0.00361289	0.00772955
gene-LOC115705015	XP_030488109.1	1	16 kDa phloem protein 1	AT3G55470.2	50	Calcium-dependent lipid-binding (CaLB domain) family protein		15.7471	12.5704	16.3011	10.9552	3.92544	-0.324392	0.218098	0.631639	-0.550848	0.043272	0.0946769	0.0433826	0.900113	0.997212	-2.01012	4.93632e-08	2.1185e-07
gene-LOC115703763	XP_030486857.1	1	probable transcriptional regulator RABBIT EARS	AT2G37740.1	78.18	zinc-finger protein 10		0.201237	0	0	0	0.305281	0	1	1	0	1	1	0	1	1	0	1	1
gene-LOC115707303	XP_030491075.1	1	tropinone reductase homolog At5g06060	AT5G06060.1	74.13	NAD(P)-binding Rossmann-fold superfamily protein		48.0202	58.4802	60.4631	49.1583	46.7509	0.278147	0.0910438	0.408444	0.00709603	0.963868	0.977788	0.322652	0.149538	0.679824	-0.0501468	0.810672	0.856926
gene-LOC115705123	XP_030488222.2	1	protein phosphatase 2C 37	AT1G07430.1	65.23	highly ABA-induced PP2C protein 2		33.1295	50.8214	45.7668	65.311	56.944	0.609008	0.000134855	0.0034344	0.953439	1.67789e-11	2.32641e-10	0.454421	0.0340776	0.31909	0.765831	2.90773e-05	8.77893e-05
gene-LOC115705691	XP_030488952.2	1	protein HESO1	AT2G39740.3	60.35	Nucleotidyltransferase family protein		14.6233	18.1082	19.386	22.0573	65.6656	0.301996	0.097066	0.423022	0.573221	0.00061101	0.00236751	0.401884	0.0874349	0.533992	2.1556	1.28395e-32	2.37624e-31
gene-LOC115705690	XP_030488951.1	1	probable methyltransferase PMT11	AT2G39750.1	70.37	S-adenosyl-L-methionine-dependent methyltransferases superfamily protein		37.5461	41.7553	35.387	37.984	30.9847	0.14536	0.324817	0.744549	-0.00675663	0.959988	0.975715	-0.0969747	0.65334	0.97771	-0.292409	0.0985307	0.150821
gene-LOC133034372	XP_060965440.1	1	uncharacterized LOC133034372	AT1G06740.1	24.79	MuDR family transposase		0	0	0	0	0	0	1	1	0	1	1	0	1	1	0	1	1
gene-LOC133034398	XP_060965472.1	1	uncharacterized LOC133034398	AT3G57587.1	27.66	Ta11-like non-LTR retrotransposon;start_range=.,21328263		0	0	0	0	0	0	1	1	0	1	1	0	1	1	0	1	1
gene-LOC115708321	XP_030492418.2	1	ultraviolet-B receptor UVR8	AT3G55580.1	69.34	Regulator of chromosome condensation (RCC1) family protein		0.916424	0.690149	0.885364	0.961614	3.97247	-0.438568	0.514877	0.859936	0.153553	0.790565	0.864483	0.0429222	0.946301	0.997681	2.20269	1.37112e-06	4.94263e-06
gene-LOC133030498	XP_060959243.1	1	wall-associated receptor kinase-like 20	AT5G02070.1	53.83	Protein kinase family protein;start_range=.,405895		1.10394	2.7272	3.5254	2.7491	2.07796	1.29693	0.00396053	0.04979	1.29896	0.00436051	0.0132753	1.66727	0.000348623	0.0102865	0.894689	0.0971996	0.149075
gene-LOC115700201	XP_060965565.1	1	uncharacterized LOC115700201	AT3G31430.1	25.13	zinc knuckle (CCHC-type) family protein;start_range=.,12795861		0	0	0	0	0	0	1	1	0	1	1	0	1	1	0	1	1
gene-LOC115704726	XP_030487792.1	1	mannose-1-phosphate guanylyltransferase 1	AT2G39770.3	91.97	Glucose-1-phosphate adenylyltransferase family protein		144.772	151.74	142.923	159.54	135.709	0.0591793	0.674074	0.923281	0.11351	0.348884	0.489077	-0.0302595	0.878678	0.996876	-0.109086	0.519044	0.608614
gene-LOC115706682	XP_030490256.2	1	CASP-like protein 5B2	AT3G53850.2	68.18	Uncharacterized protein family (UPF0497)		0	0	0	0	0	0	1	1	0	1	1	0	1	1	0	1	1
gene-LOC115703653	XP_030486753.2	1	uncharacterized protein At2g39795, mitochondrial	AT3G55605.1	51.72	Mitochondrial glycoprotein family protein		23.3905	19.4429	26.3059	15.9945	51.7043	-0.267102	0.27275	0.693318	-0.57404	0.0117259	0.0313876	0.163115	0.532463	0.956359	1.13533	2.87691e-06	9.99734e-06
gene-LOC115705168	XP_030488276.2	1	delta-1-pyrroline-5-carboxylate synthase	AT2G39800.4	79.41	delta1-pyrroline-5-carboxylate synthase 1		46.5919	46.6178	45.9309	81.1352	51.8185	-0.00733932	0.958428	0.991445	0.777162	4.27217e-10	4.98285e-09	-0.0312161	0.872574	0.996876	0.137872	0.410527	0.503573
gene-LOC115701234	XP_030484838.2	1	uncharacterized LOC115701234	AT2G39805.2	64.75	Integral membrane Yip1 family protein		22.5735	21.5812	23.5656	22.2237	57.4898	-0.0696735	0.709211	0.93128	-0.048136	0.787205	0.862065	0.0503895	0.830013	0.995797	1.33639	3.87624e-12	2.46149e-11
gene-LOC115703771	XP_030486864.2	1	ethylene-responsive transcription factor RAP2-4-like	AT1G78080.1	76.7	related to AP2 4	PK27482.1	0.230002	0	0.86802	0.63447	0	0	1	1	0	1	1	0	1	1	0	1	1
gene-LOC115706452	XP_030489966.2	1	folylpolyglutamate synthase	AT5G05980.2	67.11	DHFS-FPGS homolog B		15.9667	32.2717	22.8489	15.0525	19.0328	1.0216	3.60626e-08	2.46032e-06	-0.0815552	0.653744	0.76363	0.496703	0.0733745	0.487682	0.231992	0.278433	0.366927
gene-LOC115705653	XP_030488912.2	1	protein NEDD1	AT5G05970.2	60.78	Transducin/WD40 repeat-like superfamily protein		14.8117	11.9714	14.7895	11.243	8.95925	-0.315274	0.0667985	0.340125	-0.421699	0.00938293	0.0259315	-0.0131581	0.952478	0.998177	-0.739468	0.00031102	0.000807086
gene-LOC115706248	XP_030489696.1	1	serine/threonine-protein phosphatase PP1 isozyme 4	AT2G39840.1	89.84	type one serine/threonine protein phosphatase 4		15.3336	14.0539	15.1683	16.7153	85.9424	-0.129536	0.506771	0.857063	0.0980506	0.594344	0.714902	-0.0319242	0.894658	0.996974	2.45447	3.54594e-38	8.12984e-37
gene-LOC115704004	XP_030487087.2	1	putative UPF0481 protein At3g02645	AT3G02645.1	47.93	transmembrane protein%2C putative (DUF247)		0	0.0522625	0	0.0219093	0.104113	0	1	1	0	1	1	0	1	1	0	1	1
gene-LOC115703757	XP_030486851.2	1	putative UPF0481 protein At3g02645	AT3G02645.1	46.74	transmembrane protein%2C putative (DUF247)		0	0	0	0.0117123	0.158799	0	1	1	0	1	1	0	1	1	0	1	1
gene-LOC115704919	XP_060965966.1	1	uncharacterized LOC115704919	AT2G12400.1	50.29	plasma membrane fusion protein		0.189692	0.258836	0.582372	0.270756	0.107582	0	1	1	0	1	1	1.61137	0.0561767	0.427927	0	1	1
gene-LOC115708121	XP_030492180.2	1	mediator of RNA polymerase II transcription subunit 15a	AT1G15780.1	59.83	mediator of RNA polymerase II transcription subunit 15a-like protein		18.472	19.937	17.9751	23.1457	39.8554	0.0962738	0.561381	0.883772	0.303717	0.0322034	0.0740306	-0.0546176	0.814488	0.995429	1.09035	2.62011e-07	1.03037e-06
gene-LOC115708122	XP_030492183.2	1	mediator of RNA polymerase II transcription subunit 15a	AT1G15780.1	61.48	mediator of RNA polymerase II transcription subunit 15a-like protein		27.29	27.1806	32.063	24.217	40.6684	-0.0135367	0.947599	0.988413	-0.20357	0.300179	0.438235	0.216636	0.37833	0.895196	0.559677	0.0188933	0.0348191
gene-LOC115708120	XP_030492178.2	1	mediator of RNA polymerase II transcription subunit 15a	AT1G15780.1	61.67	mediator of RNA polymerase II transcription subunit 15a-like protein		13.5865	15.7644	13.9454	15.4138	30.2274	0.204669	0.238145	0.655425	0.159108	0.307261	0.446105	0.0259286	0.910572	0.997278	1.13678	5.76949e-08	2.45668e-07
gene-LOC133030555	XP_060959323.1	1	protein DA1-related 2	AT2G39830.2	61.39	DA1-related protein 2		2.1635	3.31745	2.79631	4.28979	4.50662	0.61035	0.0783954	0.373994	0.954783	0.00330078	0.0103937	0.328884	0.408482	0.913714	1.03591	0.00338666	0.007287
gene-LOC133030564	XP_060959336.1	1	uncharacterized LOC133030564	AT3G55640.4	73.98	Mitochondrial substrate carrier family protein		28.1074	25.233	24.291	26.0795	26.1012	-0.146902	0.36526	0.77376	-0.189941	0.232008	0.360285	-0.250264	0.263739	0.826036	-0.200693	0.292352	0.381889
gene-LOC133030573	XP_060959346.1	1	BEL1-like homeodomain protein 9	AT5G02030.1	48.23	POX (plant homeobox) family protein		4.00564	8.6708	7.76689	5.7984	2.31583	1.10841	0.000456054	0.00933128	0.512121	0.099688	0.186397	0.944517	0.00569075	0.0964329	-0.803707	0.0462734	0.0775722
gene-LOC115717944	XP_060966066.1	1	uncharacterized LOC115717944	AT2G13770.1	74.58	nuclease		0	0	0	0	0	0	1	1	0	1	1	0	1	1	0	1	1
gene-LOC115708140	XP_030492201.2	1	fructose-bisphosphate aldolase-lysine N-methyltransferase, chloroplastic	AT3G55080.1	51.95	SET domain-containing protein		4.09882	4.00863	4.59581	3.86823	4.02264	-0.0343664	0.915271	0.982713	-0.135012	0.677978	0.78246	0.159246	0.644947	0.976293	-0.0518088	0.902996	0.929719
gene-LOC115708139	XP_030492198.2	1	protein NRT1/ PTR FAMILY 5.6	AT2G37900.1	57.12	Major facilitator superfamily protein		4.89581	8.8803	9.29558	11.5693	4.23782	0.852862	0.000286075	0.00635528	1.21902	1.72535e-08	1.58336e-07	0.915206	0.00160417	0.0364938	-0.219151	0.470896	0.56323
gene-LOC115706846	XP_030490463.1	1	ras-related protein Rab2BV-like	AT1G07410.1	83.49	RAB GTPase homolog A2B		0.0383124	0	0	0.12745	3.35703	0	1	1	0	1	1	0	1	1	6.4275	5.37463e-05	0.000156251
gene-LOC133034742	XP_060966110.1	1	uncharacterized LOC133034742					0	0	0	0	0	0	1	1	0	1	1	0	1	1	0	1	1
gene-LOC133034781	XP_060966171.1	1	uncharacterized LOC133034781					0	0	0	0	0	0	1	1	0	1	1	0	1	1	0	1	1
gene-LOC133034811	XP_060966214.1	1	probable calcium-binding protein CML10	AT1G73630.1	35.62	EF hand calcium-binding protein family		10.1937	9.34001	9.14119	26.9879	13.0964	-0.10063	0.872607	0.974791	1.35644	0.0054065	0.0160026	-0.168895	0.802051	0.993728	0.385465	0.547915	0.635748
gene-LOC115706491	XP_030490013.2	1	cucumisin	AT5G03620.1	48.04	Subtilisin-like serine endopeptidase family protein		18.5467	29.724	29.309	26.7657	11.4193	0.668963	0.00221637	0.0322893	0.505239	0.00235723	0.00778113	0.646143	0.0352592	0.325591	-0.716343	0.00138898	0.00320007
gene-LOC133030589	XP_060959365.1	1	uncharacterized LOC133030589	AT4G02550.4	26.77	Myb/SANT-like DNA-binding domain protein		0.417061	0.43609	0.43694	0.426492	0.152813	0.0850325	0.907241	0.981324	0.0259496	0.972787	0.983184	0.0859895	0.916942	0.997278	0	1	1
gene-LOC133034837	XP_060966271.1	1	uncharacterized LOC133034837					0	0	0	0	0	0	1	1	0	1	1	0	1	1	0	1	1
gene-LOC115706492	XP_030490014.2	1	cucumisin	AT5G59100.1	47.69	Subtilisin-like serine endopeptidase family protein		0	0	0.0154001	0.0122784	0.316277	0	1	1	0	1	1	0	1	1	0	1	1
gene-LOC115706500	XP_030490020.2	1	uncharacterized LOC115706500	AT2G39855.4	42.57	plant/protein		0.171932	0.254625	0.295019	0.880782	1.0687	0	1	1	0	1	1	0	1	1	0	1	1
gene-LOC115706501	XP_030490021.1	1	uncharacterized LOC115706501	AT5G05960.1	70.37	Bifunctional inhibitor/lipid-transfer protein/seed storage 2S albumin superfamily protein		44.508	32.1221	41.9962	14.953	13.5697	-0.480601	0.0278014	0.197541	-1.60933	4.30487e-12	6.34592e-11	-0.100788	0.701437	0.98024	-1.73116	1.03463e-10	5.80609e-10
gene-LOC115706499	XP_030490019.1	1	uncharacterized LOC115706499	AT5G05950.1	70.52	maternal effect embryo arrest 60		29.9279	38.0789	35.2769	33.5274	22.2518	0.338419	0.0732715	0.358413	0.132035	0.477816	0.614793	0.222606	0.34765	0.876254	-0.444443	0.0586582	0.0956606
gene-LOC133034923	XP_060966460.1	1	uncharacterized LOC133034923	AT3G05850.1	29.16	MuDR family transposase		0	0	0	0	0	0	1	1	0	1	1	0	1	1	0	1	1
gene-LOC115706494	XP_030490016.2	1	rop guanine nucleotide exchange factor 7	AT5G05940.1	64.65	ROP guanine nucleotide exchange factor 5		20.6201	22.1831	23.6249	14.4115	7.30883	0.0976342	0.55697	0.881897	-0.54052	0.0011175	0.00403648	0.186472	0.388651	0.90081	-1.50866	2.19258e-12	1.42252e-11
gene-LOC133034951	XP_060966507.1	1	uncharacterized mitochondrial protein AtMg00240-like	AT4G23160.3	39.18	cysteine-rich RECEPTOR-like kinase;start_range=.,12131325		0	0	0	0	0	0	1	1	0	1	1	0	1	1	0	1	1
gene-LOC115713795	XP_030498138.2	1	uncharacterized LOC115713795	AT2G16290.1	27.27			0	0	0	0	4.68183	0	1	1	0	1	1	0	1	1	9.4263	3.86566e-10	2.05072e-09
gene-LOC133034977	XP_060966564.1	1	uncharacterized LOC133034977	AT3G09510.1	29.05	Ribonuclease H-like superfamily protein;start_range=.,2921804		0	0	0	0	0	0	1	1	0	1	1	0	1	1	0	1	1
gene-LOC115707175	XP_060959400.1	1	guanylyl cyclase 1	AT5G05930.1	64.18	guanylyl cyclase 1		8.69537	10.861	8.55089	10.6742	37.5382	0.31406	0.184917	0.585229	0.267565	0.251763	0.383328	-0.0344793	0.909818	0.997278	2.09996	1.18648e-21	1.39396e-20
gene-LOC133035007	XP_060966633.1	1	uncharacterized LOC133035007					0.0369685	0.166969	0.257354	0.217611	0.036742	0	1	1	0	1	1	0	1	1	0	1	1
gene-LOC115705924	XP_030489260.2	1	uncharacterized LOC115705924	AT3G54000.3	31	TIP41-like protein		88.5539	84.9609	83.9027	125.79	51.3661	-0.0689732	0.671044	0.922143	0.480412	0.000982978	0.00360335	-0.0907747	0.67048	0.9793	-0.801801	2.04016e-05	6.31355e-05
gene-LOC115703821	XP_030486911.2	1	uncharacterized LOC115703821	AT1G19260.1	45.3	TTF-type zinc finger protein with HAT dimerization domain-containing protein;start_range=.,6657260		0	0	0	0	0	0	1	1	0	1	1	0	1	1	0	1	1
gene-LOC133035065	XP_060966733.1	1	uncharacterized LOC133035065	AT3G29765.1	41.46			0	0	0	0	0	0	1	1	0	1	1	0	1	1	0	1	1
gene-LOC133035084	XP_060966780.1	1	uncharacterized LOC133035084	AT5G53670.1	23.88	transmembrane protein;start_range=.,21796997		0	0	0	0	0	0	1	1	0	1	1	0	1	1	0	1	1
gene-LOC115707668	XP_030491554.2	1	UDP-glycosyltransferase 76F1	AT3G55700.1	51.63	UDP-Glycosyltransferase superfamily protein		32.2542	27.7105	26.0353	15.3052	5.55445	-0.225111	0.206015	0.615769	-1.10026	1.07757e-09	1.17802e-08	-0.320685	0.160837	0.699964	-2.54816	8.55174e-28	1.32118e-26
gene-LOC133035121	XP_060966863.1	1	uncharacterized LOC133035121	AT3G29765.1	37.41			0	0	0	0	0	0	1	1	0	1	1	0	1	1	0	1	1
gene-LOC115705025	XP_030488119.2	1	UDP-glycosyltransferase 76F1	AT3G55700.1	52.36	UDP-Glycosyltransferase superfamily protein		8.95817	9.15285	7.93015	3.05783	1.02205	0.0243309	0.918569	0.982713	-1.57739	3.08258e-08	2.72739e-07	-0.188028	0.51401	0.952129	-3.12741	9.35542e-17	8.2774e-16
gene-LOC133035133	XP_060966906.1	1	uncharacterized LOC133035133	AT3G24255.5	27.72	RNA-directed DNA polymerase (reverse transcriptase)-related family protein		0	0	0	0	0	0	1	1	0	1	1	0	1	1	0	1	1
gene-LOC115706759	XP_060959424.1	1	UDP-glycosyltransferase 76F1	AT3G55700.1	52.51	UDP-Glycosyltransferase superfamily protein		1.25425	2.18053	1.23602	1.4963	0.609822	0.791859	0.0870059	0.397664	0.23368	0.654636	0.764333	-0.0123204	0.984116	0.999496	-1.0613	0.129252	0.191336
gene-LOC133035162	XP_060966977.1	1	cell wall protein IFF6-like					0	0	0	0	0	0	1	1	0	1	1	0	1	1	0	1	1
gene-LOC115706801	XP_030485489.2	1	7-deoxyloganetic acid glucosyl transferase-like	AT1G78270.1	37.74	UDP-glucosyl transferase 85A4		15.6901	12.0264	12.7667	13.3497	4.03343	-0.391302	0.0469775	0.277896	-0.257981	0.16683	0.279242	-0.309692	0.201764	0.759082	-1.97474	1.41585e-14	1.07746e-13
gene-LOC115704205	XP_030487282.2	1	7-deoxyloganetic acid glucosyltransferase	AT1G22380.1	39.13	UDP-glucosyl transferase 85A3		2.8801	2.26887	2.88527	1.47936	0.906662	-0.352865	0.357573	0.768431	-0.981714	0.0222856	0.0542358	-0.0109493	0.978404	0.999496	-1.71319	0.000837918	0.00201396
gene-LOC115720207	XP_060959450.1	1	uncharacterized LOC115720207					0.0873479	0.0937877	0.0490848	0.146397	0.0664224	0	1	1	0	1	1	0	1	1	0	1	1
gene-LOC115702178	XP_030485488.2	1	18.1 kDa class I heat shock protein-like	AT1G53540.1	69.03	HSP20-like chaperones superfamily protein		0	0	0.167344	0.122673	3.03835	0	1	1	0	1	1	0	1	1	7.35821	8.77087e-06	2.86542e-05
gene-LOC115702183	XP_030485494.2	1	uncharacterized LOC115702183	AT5G05840.1	70.37	replication factor C subunit%2C putative (DUF620)		0.465086	0.465528	0.940871	0.707788	2.25932	-0.00799953	0.992394	0.998352	0.543797	0.486627	0.622603	0.984566	0.233884	0.798688	2.26136	0.000359228	0.000922585
gene-LOC115706331	XP_030489808.2	1	uncharacterized LOC115706331	AT5G05830.1	59.79	RING/FYVE/PHD zinc finger superfamily protein		24.4759	19.3099	24.9251	18.4879	13.6592	-0.350991	0.053127	0.298604	-0.430977	0.0149369	0.0385469	0.0154252	0.952288	0.998177	-0.856208	7.52012e-05	0.000213677
gene-LOC133035199	XP_060967056.1	1	zinc finger BED domain-containing protein RICESLEEPER 2-like	AT3G42170.2	31	BED zinc finger and hAT dimerization domain-containing protein DAYSLEEPER		0	0	0.077964	0	0	0	1	1	0	1	1	0	1	1	0	1	1
gene-LOC115708186	XP_030492253.2	1	transcription factor MYB1	AT3G55730.1	43.34	myb domain protein 109	PK07741.1	5.2039	4.36182	4.23629	6.00223	8.86268	-0.263019	0.363868	0.772816	0.18309	0.519224	0.651612	-0.3077	0.360169	0.882807	0.754315	0.00932897	0.0183855
gene-LOC133035224	XP_060967075.1	1	uncharacterized LOC133035224					0	0	0	0	0	0	1	1	0	1	1	0	1	1	0	1	1
gene-LOC133035301	XP_060967079.1	1	uncharacterized mitochondrial protein AtMg00860-like					0	0	0	0	0	0	1	1	0	1	1	0	1	1	0	1	1
gene-LOC133035352	XP_060967142.1	1	uncharacterized LOC133035352					0	0	0	0	0	0	1	1	0	1	1	0	1	1	0	1	1
gene-LOC133039908	XP_060975004.1	1	uncharacterized LOC133039908					0	0	0	0	0	0	1	1	0	1	1	0	1	1	0	1	1
gene-LOC133035559	XP_060967411.1	1	uncharacterized LOC133035559					0	0	0	0	0	0	1	1	0	1	1	0	1	1	0	1	1
gene-LOC115706667	XP_030490241.1	1	proline transporter 2	AT3G55740.1	78.31	proline transporter 2		6.82271	5.85342	5.34333	4.75408	7.80045	-0.229405	0.382383	0.785019	-0.547099	0.0377066	0.084501	-0.365082	0.227891	0.792308	0.180426	0.516316	0.606088
gene-LOC115703794	XP_060959474.1	1	O-fucosyltransferase 19-like	AT2G37980.1	59.34	O-fucosyltransferase family protein		0	0	0	0	0.354099	0	1	1	0	1	1	0	1	1	0	1	1
gene-LOC115707808	XP_030491738.1	1	large ribosomal subunit protein eL33w-like	AT1G07070.1	91.96	Ribosomal protein L35Ae family protein		499.931	483.747	569.28	401.572	352.608	-0.0501195	0.736324	0.940121	-0.349103	0.00686687	0.0197166	0.177312	0.444561	0.932653	-0.51211	0.00468142	0.00981098
gene-LOC115707807	XP_030491737.1	1	probable sugar phosphate/phosphate translocator At3g11320	AT3G11320.1	91.45	Nucleotide-sugar transporter family protein		39.8316	40.7798	38.3706	38.0507	35.0703	0.0240714	0.88791	0.978065	-0.0932332	0.538873	0.669201	-0.0663353	0.75505	0.990708	-0.199074	0.291761	0.381395
gene-LOC115705644	XP_030488905.1	1	LIM domain-containing protein WLIM2b	AT3G55770.5	84.62	GATA type zinc finger transcription factor family protein		89.9644	101.344	111.398	92.4184	54.4585	0.164421	0.266672	0.686329	0.0210737	0.877183	0.924698	0.273986	0.199142	0.7557	-0.759994	1.85542e-05	5.78173e-05
gene-LOC115707223	XP_060959476.1	1	uncharacterized protein At2g39910	AT2G39910.1	56.21	ARM repeat superfamily protein		10.1864	10.0225	10.1287	11.2105	14.4192	-0.0398247	0.857638	0.971096	0.119826	0.577272	0.699798	-0.023781	0.929065	0.997607	0.476741	0.0493999	0.0821897
gene-LOC115705900	XP_060959478.1	1	uncharacterized protein At2g39920	AT2G39920.2	43	HAD superfamily%2C subfamily IIIB acid phosphatase;start_range=.,16663201		18.3896	29.0266	28.9288	40.8177	21.0161	0.65078	0.00039596	0.00839065	1.15554	1.26839e-12	1.97966e-11	0.604649	0.00806346	0.122873	0.177701	0.398771	0.492111
gene-LOC115707445	XP_030491269.2	1	glucan endo-1,3-beta-glucosidase	AT3G55780.1	56.37	Glycosyl hydrolase superfamily protein		0.290965	0.110545	0.244533	0.122785	108.901	0	1	1	0	1	1	0	1	1	8.49552	1.43785e-94	1.39526e-92
gene-LOC115700032	XP_060967478.1	1	uncharacterized LOC115700032	AT5G45570.2	24.5	Ulp1 protease family protein;start_range=.,18472301		0.0263787	0	0	0.0205292	0.0278091	0	1	1	0	1	1	0	1	1	0	1	1
gene-LOC115703773	XP_060967529.1	1	uncharacterized LOC115703773	AT4G32870.1	30.32	Polyketide cyclase/dehydrase and lipid transport superfamily protein		0	0	0	0	0.076324	0	1	1	0	1	1	0	1	1	0	1	1
gene-LOC115706198	XP_060959493.1	1	laccase-4-like	AT2G38080.1	65.32	Laccase/Diphenol oxidase family protein		0.197165	0.100821	0.155023	0.168145	0.114332	0	1	1	0	1	1	0	1	1	0	1	1
gene-LOC115705530	XP_030488744.2	1	transcription factor DIVARICATA	AT3G11280.2	55.24	Duplicated homeodomain-like superfamily protein	PK15104.1	31.7857	26.8972	28.9631	34.4081	16.6703	-0.246679	0.153827	0.537624	0.0914101	0.559564	0.685229	-0.143657	0.511413	0.950899	-0.945229	8.43032e-06	2.76069e-05
gene-LOC115704948	XP_030488024.2	1	coronatine-insensitive protein 1	AT2G39940.1	72	RNI-like superfamily protein		24.1615	23.5444	22.5049	23.1493	17.1051	-0.0453797	0.775109	0.950551	-0.0851237	0.552287	0.679824	-0.112549	0.600194	0.969417	-0.513483	0.00619417	0.0126519
gene-LOC115707658	XP_030491543.2	1	uncharacterized LOC115707658	AT2G39950.1	45.63	flocculation protein		40.8414	44.9783	43.7379	41.4538	58.8158	0.131739	0.36289	0.772514	-0.00228696	0.986031	0.991025	0.0882893	0.663726	0.978814	0.511212	0.00243701	0.00538584
gene-LOC115703777	XP_030486869.2	1	uncharacterized LOC115703777					0	0	0	0	0	0	1	1	0	1	1	0	1	1	0	1	1
gene-LOC115703778	XP_030486870.2	1	uncharacterized LOC115703778	AT1G06740.1	28.18	MuDR family transposase		0	0	0	0	0	0	1	1	0	1	1	0	1	1	0	1	1
gene-LOC115703779	XP_060959510.1	1	uncharacterized LOC115703779	AT1G31150.2	27.78	K-box region protein (DUF1985)		0.0738789	0.0262482	0.0540795	0.0143656	0.0586214	0	1	1	0	1	1	0	1	1	0	1	1
gene-LOC115706482	XP_060959514.1	1	signal peptidase complex subunit 2	AT2G39960.1	78.84	Microsomal signal peptidase 25 kDa subunit (SPC25)		87.1833	80.6625	94.2114	74.9805	159.665	-0.115635	0.510334	0.858555	-0.245121	0.141235	0.24484	0.10427	0.673116	0.9793	0.862514	7.5363e-06	2.48652e-05
gene-LOC133035682	XP_060967777.1	1	uncharacterized LOC133035682					0	0	0	0	0	0	1	1	0	1	1	0	1	1	0	1	1
gene-LOC133035703	XP_060967821.1	1	uncharacterized LOC133035703	AT3G21000.1	23.03	Gag-Pol-related retrotransposon family protein		0	0	0	0	0	0	1	1	0	1	1	0	1	1	0	1	1
gene-LOC115705716	XP_030488990.1	1	uncharacterized acetyltransferase At3g50280	AT2G39980.1	67.96	HXXXD-type acyl-transferase family protein		12.0341	12.3233	3.04589	21.8902	3.89898	0.032949	0.960038	0.991445	0.846362	0.199747	0.321403	-1.98564	1.13401e-07	9.19753e-06	-1.637	6.44064e-06	2.14553e-05
gene-LOC115705413	XP_030488606.2	1	uncharacterized LOC115705413	AT3G55820.1	43.75	Fasciclin-like arabinogalactan family protein		4.38021	5.41024	5.06438	7.00699	5.15729	0.284605	0.399286	0.795848	0.64199	0.0474132	0.102089	0.195173	0.610325	0.970504	0.214429	0.580656	0.664623
gene-LOC115705412	XP_030488605.1	1	26S proteasome non-ATPase regulatory subunit 7 homolog A	AT5G05780.1	89.94	RP non-ATPase subunit 8A		60.1989	60.9939	59.0684	53.0984	78.6552	0.0132306	0.93471	0.98474	-0.20667	0.167314	0.279781	-0.0368278	0.860372	0.996876	0.373483	0.0533853	0.0880049
gene-LOC115707341	XP_030491131.2	1	WUSCHEL-related homeobox 5	AT3G11260.1	51.35	WUSCHEL related homeobox 5	PK12498.1	0	0	0	0	0.242205	0	1	1	0	1	1	0	1	1	0	1	1
gene-LOC115706118	XP_030489512.1	1	eukaryotic translation initiation factor 3 subunit F	AT2G39990.1	78.2	eukaryotic translation initiation factor 2		128.651	119.41	136.624	100.355	237.913	-0.115223	0.412524	0.803962	-0.385393	0.0019813	0.00667339	0.0758881	0.695771	0.980067	0.872598	5.01993e-08	2.15129e-07
gene-LOC115704794	XP_030487862.2	1	aquaporin PIP1-2	AT4G00430.1	89.93	plasma membrane intrinsic protein 1%3B4		198.879	181.297	184.102	275.431	124.603	-0.140603	0.31642	0.736733	0.44256	0.000176528	0.000781539	-0.122723	0.520551	0.954855	-0.690217	9.79933e-05	0.000273589
gene-LOC133035800	XP_060968096.1	1	uncharacterized LOC133035800	AT1G06740.1	24.58	MuDR family transposase		0	0	0	0	0	0	1	1	0	1	1	0	1	1	0	1	1
gene-LOC115701133	XP_060968370.1	1	uncharacterized LOC115701133					1.16375	1.0347	0.738645	0.710859	0.673992	-0.446927	0.429733	0.813292	-0.69744	0.216347	0.341121	-0.856404	0.151055	0.683515	-0.897439	0.171421	0.242445
gene-LOC115706556	XP_030490104.2	1	glycosylinositol phosphorylceramide mannosyl transferase 1	AT3G55830.1	68.73	Nucleotide-diphospho-sugar transferases superfamily protein		19.713	15.4322	14.2503	18.4216	159.805	-0.359639	0.0576942	0.312853	-0.122467	0.474986	0.612018	-0.47667	0.0416372	0.362411	3.00478	8.8659e-69	4.73692e-67
gene-LOC115708141	XP_030492204.2	1	uncharacterized LOC115708141	AT2G29670.2	40.95	Tetratricopeptide repeat (TPR)-like superfamily protein		3.41572	4.34567	3.90149	6.70228	51.9399	0.3389	0.231424	0.646226	0.954237	0.000196932	0.000860181	0.164653	0.64687	0.976997	3.9022	2.65456e-75	1.66625e-73
gene-LOC115705119	XP_030488220.1	1	nematode resistance protein-like HSPRO2	AT2G40000.1	53.66	ortholog of sugar beet HS1 PRO-1 2		13.4308	6.56738	5.34788	8.83801	11.0709	-1.04287	3.31521e-05	0.00104782	-0.629343	0.165547	0.277601	-1.34279	7.2479e-06	0.000361083	-0.296412	0.272042	0.359628
gene-LOC115705126	XP_030488227.1	1	large ribosomal subunit protein uL10	AT2G40010.1	82.97	Ribosomal protein L10 family protein		599.097	639.106	721.789	334.615	378.304	0.0862964	0.500257	0.854233	-0.865837	6.38839e-15	1.2734e-13	0.258124	0.161576	0.701863	-0.677388	1.02818e-05	3.32277e-05
gene-LOC133030742	XP_060959536.1	1	uncharacterized LOC133030742	AT2G06420.1	28.4	En/Spm-like transposon%2C putative (DUF1985)		0.202635	0.252842	0.492571	0.276635	0.201848	0	1	1	0	1	1	1.26	0.12293	0.623619	0	1	1
gene-LOC133035826	XP_060968179.1	1	uncharacterized LOC133035826	AT3G05850.1	31.88	MuDR family transposase		0.0128807	0	0.0132543	0	0	0	1	1	0	1	1	0	1	1	0	1	1
gene-LOC115708162	XP_030492231.1	1	syntaxin-31	AT5G05760.1	66.86	syntaxin of plants 31		16.4633	13.7703	13.3815	14.3338	32.5694	-0.266589	0.195089	0.600066	-0.228475	0.255453	0.387763	-0.307294	0.224211	0.787931	0.969157	5.11415e-06	1.72282e-05
gene-LOC115705875	XP_030489182.2	1	auxin transporter-like protein 2	AT2G38120.1	84.68	Transmembrane amino acid transporter family protein		9.13595	14.7602	12.4663	18.8023	11.5056	0.681078	0.00056541	0.0111507	1.01523	6.02513e-08	5.11588e-07	0.433832	0.113601	0.602414	0.314057	0.182419	0.255555
gene-LOC115703839	XP_030486929.2	1	uncharacterized LOC115703839	AT2G40020.2	46.27	Nucleolar histone methyltransferase-related protein		11.6699	9.05741	11.8927	14.7992	36.3164	-0.369678	0.0992478	0.427807	0.320283	0.105764	0.195075	0.019357	0.941034	0.99768	1.62346	1.53592e-14	1.16341e-13
gene-LOC115707975	XP_060959554.1	1	probable zinc metalloprotease EGY2, chloroplastic	AT5G05740.2	70.08	ethylene-dependent gravitropism-deficient and yellow-green-like 2		24.6827	40.2675	32.2137	16.3483	10.173	0.697692	3.68281e-05	0.00114673	-0.618441	0.000165951	0.000739262	0.372419	0.144984	0.672228	-1.29276	8.50571e-10	4.36894e-09
gene-LOC115703803	XP_060968295.1	1	uncharacterized LOC115703803					0	0	0	0	0	0	1	1	0	1	1	0	1	1	0	1	1
gene-LOC115705837	XP_030489142.2	1	anthranilate synthase alpha subunit 1, chloroplastic	AT5G05730.1	74.08	anthranilate synthase alpha subunit 1		9.18087	7.76641	7.76484	11.5311	7.23724	-0.246503	0.292008	0.711076	0.305975	0.176438	0.291843	-0.247576	0.369902	0.888453	-0.353744	0.218599	0.297949
gene-LOC115706145	XP_030489540.1	1	pleckstrin homology domain-containing protein 1	AT5G05710.1	85.31	Pleckstrin homology (PH) domain superfamily protein		85.3102	79.4117	77.6693	104.7	65.4874	-0.108778	0.513517	0.859936	0.265368	0.0678343	0.136427	-0.145862	0.509671	0.950665	-0.393983	0.0388926	0.0664256
gene-LOC115703802	XP_060959563.1	1	uncharacterized LOC115703802	AT1G49330.1	40.09	hydroxyproline-rich glycoprotein family protein		0.0838965	0.0245866	0.0504965	0.0737796	1.42826	0	1	1	0	1	1	0	1	1	0	1	1
gene-LOC133035931	XP_060968366.1	1	uncharacterized LOC133035931	AT5G64830.1	46.33	programmed cell death 2 C-terminal domain-containing protein		0	0	0	0	0	0	1	1	0	1	1	0	1	1	0	1	1
gene-LOC115703817	XP_060959572.1	1	uncharacterized LOC115703817	AT2G16190.1	40.09	hypothetical protein		0.145895	0.116308	0.0670107	0.328376	1.85391	0	1	1	0	1	1	0	1	1	3.46066	9.92778e-06	3.21413e-05
gene-LOC115704784	XP_060968414.1	1	uncharacterized LOC115704784	AT2G16190.1	40.09	hypothetical protein		0.726629	0.352219	0.381494	1.00157	0.960857	0	1	1	0	1	1	0	1	1	0	1	1
gene-LOC115706362	XP_030489841.2	1	clathrin light chain 2	AT2G40060.1	56.34	Clathrin light chain protein		83.3017	86.1762	84.0258	80.5733	59.6514	0.0413768	0.780921	0.950998	-0.0766394	0.576689	0.699565	0.000675095	0.997359	0.999603	-0.496761	0.00544714	0.0112515
gene-LOC115706360	XP_030489840.2	1	uncharacterized LOC115706360	AT2G40070.1	61.67	flocculation FLO11-like protein		26.9014	29.2143	28.2584	23.9444	20.5977	0.110298	0.492011	0.84883	-0.192165	0.203637	0.325721	0.0585569	0.795456	0.993494	-0.401376	0.0434181	0.0733179
gene-LOC115703846	XP_060968449.1	1	uncharacterized LOC115703846	AT2G07760.1	19.74			0	0	0	0	0	0	1	1	0	1	1	0	1	1	0	1	1
gene-LOC115706092	XP_030489474.2	1	uncharacterized LOC115706092	AT2G35040.1	80.56	AICARFT/IMPCHase bienzyme family protein		62.3338	65.7703	66.7329	48.6975	38.2703	0.0604811	0.680196	0.925081	-0.375371	0.00505721	0.0150982	0.0753336	0.699223	0.980077	-0.739087	1.67106e-05	5.24822e-05
gene-LOC115708271	XP_030492356.1	1	protein yippee-like	AT2G40110.1	79.23	Yippee family putative zinc-binding protein		29.1117	34.7492	33.9703	26.7726	74.6652	0.253317	0.265835	0.685002	-0.15035	0.532705	0.663939	0.21337	0.444836	0.932845	1.35203	2.3913e-07	9.45774e-07
gene-LOC115706424	XP_030489934.1	1	chlorophyll a-b binding protein CP29.3, chloroplastic	AT2G40100.1	73.91	light harvesting complex photosystem II		506.837	724.39	531.413	140.061	135.585	0.50995	0.00463409	0.0560331	-1.87898	1.10402e-35	8.62335e-34	0.0590755	0.837352	0.995797	-1.91563	2.92961e-19	2.9916e-18
gene-LOC133036063	XP_060968532.1	1	uncharacterized LOC133036063					0.067079	0.068939	0.0799945	0	0	0	1	1	0	1	1	0	1	1	0	1	1
gene-LOC115705581	XP_060959621.1	1	3beta,22alpha-dihydroxysteroid 3-dehydrogenase	AT5G05690.1	76.81	Cytochrome P450 superfamily protein		53.1149	47.7023	49.5943	48.5182	32.9464	-0.163141	0.302909	0.72277	-0.156207	0.278495	0.414323	-0.111388	0.592613	0.968773	-0.705596	0.000442807	0.0011204
gene-LOC115705580	XP_030488810.2	1	nuclear pore complex protein NUP88	AT5G05680.1	61.9	nuclear pore complex protein-like protein		14.3704	13.5803	15.0914	13.2967	13.2552	-0.0880102	0.610781	0.901699	-0.133755	0.417444	0.557173	0.0615388	0.783832	0.992996	-0.130778	0.515891	0.605748
gene-LOC115706182	XP_030489596.2	1	uncharacterized LOC115706182	AT2G40095.2	59.13	Alpha/beta hydrolase related protein		2.78291	2.28488	3.05143	3.22488	5.85299	-0.29459	0.54482	0.874661	0.17306	0.709036	0.806177	0.118171	0.819496	0.995721	1.05038	0.0195925	0.0359647
gene-LOC115707427	XP_030491249.2	1	putative ABC1 protein At2g40090	AT2G40090.1	76.31	ABC2 homolog 9		7.56663	6.79678	6.11688	8.0929	16.2595	-0.192089	0.422868	0.810251	0.0824894	0.721199	0.814912	-0.355283	0.207403	0.768841	1.05896	0.000144258	0.000393456
gene-LOC133036205	XP_060968714.1	1	uncharacterized LOC133036205	AT5G45570.2	24.52	Ulp1 protease family protein;start_range=.,18472301		0	0	0	0	0.0311533	0	1	1	0	1	1	0	1	1	0	1	1
gene-LOC115707323	XP_030491105.1	1	GDSL esterase/lipase CPRD49	AT3G11210.1	70.7	SGNH hydrolase-type esterase superfamily protein		35.1255	33.895	35.2823	33.7335	45.9313	-0.0567731	0.754696	0.944819	-0.0833748	0.614157	0.73205	-0.00267844	0.99049	0.999496	0.375946	0.0880161	0.136814
gene-LOC115703786	XP_030486877.2	1	GDSL esterase/lipase At2g40250-like	AT2G40250.1	49.24	SGNH hydrolase-type esterase superfamily protein		0.0446336	0.0444873	0.0261771	0	15.0448	0	1	1	0	1	1	0	1	1	8.3813	6.40629e-15	4.98724e-14
gene-LOC115706433	XP_030489944.1	1	DNA replication complex GINS protein PSF3	AT3G55490.1	70.27	GINS complex protein		10.5593	10.2348	11.0675	4.25371	25.9533	-0.0479275	0.862672	0.971954	-1.33301	3.51549e-05	0.000183468	0.0595082	0.850178	0.996523	1.28744	1.56863e-06	5.6118e-06
gene-LOC115706039	XP_030489400.2	1	protein EARLY FLOWERING 4	AT2G40080.1	65.06	EARLY FLOWERING-like protein (DUF1313)		68.5665	156.916	150.451	146.58	99.4227	1.18591	4.11114e-13	7.18721e-11	1.06333	1.11673e-11	1.57492e-10	1.1189	2.09047e-07	1.60995e-05	0.520659	0.00770973	0.0154401
gene-LOC115706040	XP_030489401.2	1	peptidyl-prolyl cis-trans isomerase CYP19-4	AT3G55920.1	67.56	Cyclophilin-like peptidyl-prolyl cis-trans isomerase family protein		13.3422	13.5892	13.0071	14.2824	10.0771	0.0190812	0.934522	0.98474	0.0680837	0.764076	0.845534	-0.0502595	0.859507	0.99684	-0.420303	0.133353	0.19666
gene-LOC115706257	XP_030489706.2	1	phosphoinositide phospholipase C 6	AT2G40116.1	62.8	Phosphoinositide-specific phospholipase C family protein		10.6242	12.6108	14.1437	15.5153	18.0237	0.238147	0.24136	0.658056	0.520959	0.00597809	0.0174905	0.402504	0.116973	0.609514	0.747502	0.000746668	0.00181015
gene-LOC115703785	XP_060959670.1	1	protein neprosin-like	AT5G56530.2	40.16	tRNA-splicing ligase (DUF239)		0.299705	0.234933	0.110658	0.213022	0.897374	0	1	1	0	1	1	0	1	1	0	1	1
gene-LOC133030775	XP_060959635.1	1	NF-X1-type zinc finger protein NFXL2	AT5G05660.1	67.73	NF-X1-type zinc finger protein NFXL2		13.9859	11.4166	11.219	10.2599	9.74512	-0.300823	0.0974541	0.423678	-0.480431	0.00527841	0.0156799	-0.333814	0.171065	0.714618	-0.538535	0.0172715	0.0320938
gene-LOC115703783	XP_030486875.2	1	uncharacterized LOC115703783	AT4G29090.1	25.35	Ribonuclease H-like superfamily protein;start_range=.,14333528		0	0	0	0	0	0	1	1	0	1	1	0	1	1	0	1	1
gene-LOC115707607	XP_030491481.2	1	putative serine/threonine-protein kinase-like protein CCR3	AT3G55950.1	62.04	CRINKLY4 related 3		5.34553	4.13271	4.58202	4.5823	5.96698	-0.3832	0.135406	0.506918	-0.2476	0.30736	0.446153	-0.23691	0.412386	0.914616	0.139169	0.598823	0.680815
gene-LOC115707608	XP_030491482.1	1	uncharacterized LOC115707608	AT3G55960.1	71	Haloacid dehalogenase-like hydrolase (HAD) superfamily protein		21.2024	22.1091	21.6517	17.7334	12.8248	0.052223	0.763325	0.94748	-0.283614	0.0998709	0.186571	0.0182499	0.939429	0.99768	-0.741661	0.00103129	0.0024373
gene-LOC115705436	XP_030488632.2	1	serine/threonine-protein kinase ppk15	AT2G40120.1	80.18	Protein kinase superfamily protein		12.7937	13.9424	14.134	13.0686	12.9629	0.164656	0.377599	0.781123	0.0424159	0.81287	0.880451	0.104417	0.653733	0.977862	-0.168196	0.45307	0.545565
gene-LOC115701983	XP_060968817.1	1	uncharacterized LOC115701983	AT1G43760.1	24.86			0	0	0	0	0	0	1	1	0	1	1	0	1	1	0	1	1
gene-LOC133036308	XP_060968875.1	1	uncharacterized LOC133036308					0	0	0	0	0	0	1	1	0	1	1	0	1	1	0	1	1
gene-LOC115696672	XP_060968928.1	1	uncharacterized LOC115696672					0	0	0	0	0	0	1	1	0	1	1	0	1	1	0	1	1
gene-LOC133030806	XP_060959678.1	1	protein SMAX1-LIKE 8	AT2G29970.1	37.81	Double Clp-N motif-containing P-loop nucleoside triphosphate hydrolases superfamily protein		6.04278	7.10084	7.62712	6.86003	5.21125	0.226006	0.265382	0.684585	0.162735	0.425967	0.565575	0.326829	0.188527	0.740444	-0.227924	0.348369	0.440789
gene-LOC133036343	XP_060968974.1	1	uncharacterized LOC133036343	AT3G24255.5	26.65	RNA-directed DNA polymerase (reverse transcriptase)-related family protein		0	0	0	0	0.072666	0	1	1	0	1	1	0	1	1	0	1	1
gene-LOC133030808	XP_060959687.1	1	PHD finger protein ALFIN-LIKE 2-like	AT5G05610.2	76.67	alfin-like 1		35.0339	33.1571	36.4034	26.2264	15.8462	-0.0861946	0.599268	0.897164	-0.443802	0.0048495	0.0145586	0.0440196	0.837245	0.995797	-1.15931	2.35407e-08	1.05125e-07
gene-LOC133030811	XP_060959693.1	1	uncharacterized LOC133030811					0	0	0	0	0	0	1	1	0	1	1	0	1	1	0	1	1
gene-LOC115706497	XP_030490018.2	1	jasmonate-induced oxygenase 2-like	AT5G05600.1	66.67	2-oxoglutarate (2OG) and Fe(II)-dependent oxygenase superfamily protein		3.58915	1.42154	1.59836	1.77401	1.20027	-1.35899	0.0013052	0.0217962	-1.0447	0.00455732	0.0137749	-1.18634	0.00466775	0.0829279	-1.5909	0.000292639	0.000763251
gene-LOC133030814	XP_060959706.1	1	uncharacterized LOC133030814					0	0	0	0	0	0	1	1	0	1	1	0	1	1	0	1	1
gene-LOC115706495	XP_060959711.1	1	cyclin-T1-3-like	AT5G45190.1	57.74	Cyclin family protein		21.5676	21.266	23.8853	22.4213	29.2861	-0.0346349	0.838201	0.966299	0.0456915	0.765671	0.846811	0.0943692	0.658732	0.978814	0.420569	0.0415286	0.0704784
gene-LOC133036455	XP_060969008.1	1	uncharacterized LOC133036455	AT5G28235.1	26.26	Ulp1 protease family protein;start_range=.,10201271		0	0	0	0	0	0	1	1	0	1	1	0	1	1	0	1	1
gene-LOC115705593	XP_030488827.2	1	zinc finger CCCH domain-containing protein 29	AT2G40140.2	52.19	zinc finger (CCCH-type) family protein		28.7868	22.4353	21.6134	39.5874	41.2386	-0.372266	0.471047	0.838139	0.432802	0.379557	0.520489	-0.429298	0.145408	0.673077	0.500379	0.0605849	0.0984183
gene-LOC115724895	XP_060959743.1	1	uncharacterized LOC115724895	AT1G16180.2	88.52	Serinc-domain containing serine and sphingolipid biosynthesis protein		0.667712	0.548225	0.595528	0.313048	1.19834	-0.101287	0.894556	0.97914	0	1	1	-0.155704	0.845093	0.995985	1.18039	0.0767516	0.1213
gene-LOC115705594	XP_030488828.1	1	omega-3 fatty acid desaturase, chloroplastic	AT5G05580.1	73.2	fatty acid desaturase 8		74.1533	103.529	85.9053	30.2388	26.3107	0.473098	0.0136521	0.121037	-1.31653	3.29289e-21	1.07249e-19	0.201247	0.48216	0.943183	-1.50975	1.43724e-15	1.17332e-14
gene-LOC133036554	XP_060969077.1	1	protein FAR1-RELATED SEQUENCE 5-like	AT4G38180.1	30.11	FAR1-related sequence 5		0	0	0	0	0	0	1	1	0	1	1	0	1	1	0	1	1
gene-LOC133039915	XP_060975017.1	1	uncharacterized LOC133039915	AT3G30165.1	36.51			0	0	0	0	0	0	1	1	0	1	1	0	1	1	0	1	1
gene-LOC133039917	XP_060975023.1	1	uncharacterized LOC133039917					0	0	0	0	0	0	1	1	0	1	1	0	1	1	0	1	1
gene-LOC115706608	XP_030490175.2	1	clustered mitochondria protein	AT3G52140.1	68.44	tetratricopeptide repeat (TPR)-containing protein		27.181	27.6957	27.82	29.934	21.8108	0.0178586	0.906311	0.981324	0.116483	0.354944	0.495236	0.0220817	0.915702	0.997278	-0.332871	0.0487879	0.0813223
gene-LOC133036595	XP_060969103.1	1	uncharacterized LOC133036595	AT2G06105.1	40.28			0	0	0	0	0	0	1	1	0	1	1	0	1	1	0	1	1
gene-LOC115706224	XP_030489662.2	1	uncharacterized LOC115706224	AT5G05570.2	49.34	transducin family protein / WD-40 repeat family protein		0.635528	1.13778	0.889323	1.80131	4.62004	0.848357	0.0608946	0.323621	1.48467	0.00020383	0.000888288	0.471438	0.357477	0.881383	2.85053	9.15503e-16	7.57379e-15
gene-LOC115704877	XP_030487947.2	1	gibberellin 2-beta-dioxygenase 1	AT3G11150.1	43.88	2-oxoglutarate (2OG) and Fe(II)-dependent oxygenase superfamily protein		4.2013	2.03713	2.31668	0.821327	2.0408	-1.05021	0.0061778	0.0688195	-2.36889	5.30693e-07	3.86207e-06	-0.873149	0.0447634	0.377875	-1.05837	0.015864	0.0297368
gene-LOC115706110	XP_030489496.2	1	xylan O-acetyltransferase 1	AT3G55990.1	72.39	trichome birefringence-like protein (DUF828)		3.24095	3.2094	3.70909	2.53363	203.505	0.0108076	0.97391	0.99447	-0.349883	0.283147	0.419411	0.210978	0.546209	0.962346	5.95408	2.3686e-170	1.28852e-167
gene-LOC115705997	XP_060959771.1	1	anaphase-promoting complex subunit 1	AT5G05560.2	65.66	E3 ubiquitin ligase		8.41512	9.47988	9.08182	6.47175	7.37077	0.162539	0.404601	0.798498	-0.40144	0.0278272	0.065363	0.0977848	0.68909	0.980067	-0.206635	0.321355	0.412658
gene-LOC115706427	XP_030489938.2	1	uncharacterized LOC115706427					27.0791	20.3468	21.4978	27.1848	29.4428	-0.418638	0.0184909	0.148556	-0.00958035	0.951146	0.970314	-0.34076	0.158946	0.697109	0.108015	0.577079	0.661371
gene-LOC115704787	XP_030487856.1	1	probable protein phosphatase 2C 25	AT2G30020.1	58.29	Protein phosphatase 2C family protein		0.869789	0.502296	0.332137	0.969869	6.16087	0	1	1	0.141566	0.850692	0.907411	0	1	1	2.84198	3.5299e-08	1.5448e-07
gene-LOC115705029	XP_030488124.1	1	clathrin heavy chain 1	AT3G11130.1	92.82	Clathrin%2C heavy chain		102.113	107.462	108.727	92.2815	96.3602	0.0650534	0.668122	0.921149	-0.167206	0.162849	0.274039	0.079505	0.741767	0.988139	-0.0989601	0.529258	0.618262
gene-LOC115707760	XP_030491675.2	1	GDP-Man:Man(3)GlcNAc(2)-PP-Dol alpha-1,2-mannosyltransferase	AT2G40190.1	74.07	UDP-Glycosyltransferase superfamily protein		10.0478	9.12522	9.22175	7.91271	9.57505	-0.146066	0.52169	0.862911	-0.36665	0.110776	0.202373	-0.131526	0.627639	0.974261	-0.082773	0.750078	0.80917
gene-LOC115707201	XP_030490943.2	1	uncharacterized LOC115707201	AT3G56010.1	67.24	transmembrane protein		31.7075	41.8679	34.6545	16.4821	12.9902	0.393672	0.031531	0.213899	-0.972036	3.92214e-07	2.90202e-06	0.116613	0.637308	0.976217	-1.29889	5.27391e-08	2.25583e-07
gene-LOC115703614	XP_030486710.1	1	transcription factor bHLH51	AT2G40200.1	48.21	basic helix-loop-helix (bHLH) DNA-binding superfamily protein		5.51907	5.74653	4.41468	4.27497	1.09166	0.0519566	0.87829	0.975923	-0.401109	0.275125	0.410475	-0.332047	0.464688	0.939864	-2.32797	7.84423e-06	2.581e-05
gene-LOC115705028	XP_030488122.2	1	transcription factor MYB77	AT5G67300.1	40.43	myb domain protein r1	PK01153.1	2.17319	1.58882	1.84223	1.51739	25.2666	-0.485303	0.379227	0.78256	-0.527676	0.349353	0.48953	-0.256461	0.676737	0.979766	3.51911	7.2163e-28	1.11775e-26
gene-LOC115704852	XP_030487924.2	1	RING-H2 finger protein ATL66	AT3G11110.1	45.39	RING/U-box superfamily protein		16.352	6.95015	6.48906	4.02304	3.8547	-1.24091	3.19668e-07	1.77062e-05	-2.04485	5.26199e-14	9.6787e-13	-1.34167	2.7557e-06	0.000153706	-2.09415	2.89658e-12	1.85778e-11
gene-LOC115703789	XP_030486881.2	1	ethylene-responsive transcription factor ABI4	AT2G40220.1	44.55	Integrase-type DNA-binding superfamily protein	PK08602.1	0	0	0	0.0253995	0.602614	0	1	1	0	1	1	0	1	1	0	1	1
gene-LOC115707081	XP_030490778.2	1	alcohol acyltransferase 9	AT2G40230.1	64.76	HXXXD-type acyl-transferase family protein		13.2053	7.20757	7.38351	2.85093	3.13877	-0.882638	9.25217e-05	0.00250047	-2.23371	3.10402e-18	8.21803e-17	-0.846748	0.00149045	0.0344673	-2.08984	1.72396e-12	1.12704e-11
gene-LOC133036723	XP_060969430.1	1	uncharacterized LOC133036723	AT2G02650.1	24.17			0	0	0	0	0	0	1	1	0	1	1	0	1	1	0	1	1
gene-LOC115704225	XP_030487300.2	1	pentatricopeptide repeat-containing protein At3g56030, mitochondrial	AT3G56030.1	44.92	Tetratricopeptide repeat (TPR)-like superfamily protein		11.0689	10.2315	10.5781	9.3048	28.2985	-0.0908282	0.686728	0.92588	-0.258883	0.241948	0.372171	-0.116193	0.661002	0.978814	1.27953	3.53857e-09	1.70994e-08
gene-LOC115704226	XP_030487303.2	1	trihelix transcription factor ENAP1	AT3G11100.1	55.51	sequence-specific DNA binding transcription factor	PK22475.2	11.8274	11.868	12.1761	13.6839	12.0653	-0.00108965	0.996297	0.999334	0.187172	0.405413	0.54568	0.0314702	0.909775	0.997278	0.0162286	0.951663	0.96473
gene-LOC115703599	XP_030486689.1	1	LOB domain-containing protein 21-like	AT3G11090.1	76.61	LOB domain-containing protein 21	PK26472.1	26.5202	17.4656	21.5017	19.8704	12.6244	-0.611581	0.00245277	0.034797	-0.444598	0.0196548	0.0487613	-0.31477	0.19546	0.750727	-1.08697	6.95514e-06	2.30622e-05
gene-LOC115705081	XP_030488181.2	1	U-box domain-containing protein 1-like	AT3G46510.1	36.47	plant U-box 13		4.36911	4.73827	4.46411	5.93379	4.16582	0.108784	0.687433	0.926447	0.416766	0.103911	0.192541	0.0197924	0.949553	0.997967	-0.0873486	0.783353	0.835428
gene-LOC115705080	XP_030488180.2	1	UTP--glucose-1-phosphate uridylyltransferase 3, chloroplastic	AT3G56040.1	62.03	UDP-glucose pyrophosphorylase 3		18.0115	21.6034	17.1954	9.46143	9.73965	0.253849	0.195928	0.601145	-0.951807	3.19082e-08	2.81595e-07	-0.0775908	0.753636	0.990708	-0.901522	1.39288e-05	4.43509e-05
gene-LOC133036772	XP_060969495.1	1	uncharacterized LOC133036772					0	0	0	0	0	0	1	1	0	1	1	0	1	1	0	1	1
gene-LOC133030903	XP_060959896.1	1	uncharacterized LOC133030903	AT3G56290.1	63.13	potassium transporter		3.00561	1.6976	1.57199	0.903731	1.13993	-0.819587	0.122632	0.479459	-1.73821	0.00524067	0.0155785	-0.919834	0.111102	0.597726	-1.41033	0.0327188	0.0570205
gene-LOC133030892	XP_060959850.1	1	potassium transporter 2	AT2G40540.5	80.7	potassium transporter 2		46.3781	59.3315	58.9514	70.5915	34.8669	0.360355	0.0115915	0.108615	0.627502	2.99231e-07	2.26252e-06	0.311025	0.145953	0.673853	-0.431905	0.0120688	0.0232268
gene-LOC133036822	XP_060969579.1	1	uncharacterized LOC133036822	AT4G29090.1	25.87	Ribonuclease H-like superfamily protein;start_range=.,14333528		0	0	0	0	0	0	1	1	0	1	1	0	1	1	0	1	1
gene-LOC133036922	XP_060969694.1	1	uncharacterized LOC133036922	AT3G09510.1	25.07	Ribonuclease H-like superfamily protein;start_range=.,2921804		0	0	0	0	0.0366894	0	1	1	0	1	1	0	1	1	0	1	1
gene-LOC133030904	XP_060959902.1	1	mitochondrial import inner membrane translocase subunit TIM22-1-like	AT3G10110.4	68.22	Mitochondrial import inner membrane translocase subunit Tim17/Tim22/Tim23 family protein		10.0283	6.78709	8.11303	8.06138	7.00525	-0.566782	0.0794738	0.376357	-0.343798	0.27673	0.412251	-0.32286	0.389989	0.901255	-0.527313	0.149761	0.216449
gene-LOC133036974	XP_060969760.1	1	uncharacterized LOC133036974					0	0	0	0	0	0	1	1	0	1	1	0	1	1	0	1	1
gene-LOC115706200	XP_030489629.2	1	alpha-galactosidase 3	AT3G56310.1	72.77	Melibiase family protein		36.0137	41.2357	41.4887	43.2538	31.7299	0.223273	0.160894	0.548683	0.272634	0.0551108	0.115354	0.195529	0.344288	0.874997	-0.203546	0.278895	0.367395
gene-LOC115705235	XP_030488368.2	1	uncharacterized LOC115705235	AT3G56320.7	53.24	PAP/OAS1 substrate-binding domain superfamily;start_range=.,20886193		12.6768	14.6638	14.1644	12.0564	12.1528	0.166213	0.392692	0.791958	-0.105096	0.56439	0.689441	0.128824	0.582159	0.967466	-0.0888597	0.685641	0.756569
gene-LOC115705236	XP_030488375.2	1	tRNA (guanine(26)-N(2))-dimethyltransferase	AT3G56330.1	65.65	N2%2CN2-dimethylguanosine tRNA methyltransferase		8.09913	11.5641	11.7365	2.85517	10.7767	0.494741	0.0275792	0.196461	-1.6244	2.74286e-08	2.4431e-07	0.530973	0.045897	0.383114	0.39243	0.131618	0.194325
gene-LOC115706606	XP_030490173.2	1	superoxide dismutase [Mn], mitochondrial	AT3G10920.1	78.11	manganese superoxide dismutase 1		115.453	121.291	133.297	67.7299	71.5666	0.0658621	0.660158	0.919194	-0.796934	3.14445e-08	2.77645e-07	0.197364	0.327085	0.867389	-0.701739	0.000143882	0.00039249
gene-LOC115707051	XP_030490731.2	1	UDP-xylose transporter 3	AT1G06890.2	77.87	nodulin MtN21 /EamA-like transporter family protein		18.6482	16.7334	17.2814	18.3802	15.7067	-0.152905	0.414885	0.806446	-0.0322898	0.853332	0.909384	-0.131248	0.571261	0.96639	-0.252825	0.262492	0.348695
gene-LOC115704896	XP_030487967.2	1	reticulon-like protein B16	AT3G10915.2	58.93	Reticulon family protein		4.7986	3.70721	4.16718	6.0793	66.5072	-0.374997	0.300533	0.720447	0.308645	0.349762	0.489944	-0.212115	0.586088	0.968061	3.77801	1.03769e-61	4.56584e-60
gene-LOC115706842	XP_060959937.1	1	protein BREAKING OF ASYMMETRY IN THE STOMATAL LINEAGE	AT5G60880.1	28.5	breaking of asymmetry in the stomatal lineage		0.908806	0.640688	0.628937	0.790546	0.571255	-0.484205	0.48637	0.846758	-0.224891	0.744095	0.831396	-0.530974	0.470829	0.941081	-0.635771	0.441383	0.53405
gene-LOC133037014	XP_060969810.1	1	uncharacterized LOC133037014	AT3G24255.5	27.23	RNA-directed DNA polymerase (reverse transcriptase)-related family protein		0	0	0	0	0	0	1	1	0	1	1	0	1	1	0	1	1
gene-LOC115708177	XP_030492244.1	1	adenine/guanine permease AZG1	AT3G10960.1	77.98	AZA-guanine resistant1		15.0562	10.8834	8.21489	10.0621	4.97061	-0.476452	0.0156645	0.13379	-0.605243	0.00223794	0.00743913	-0.888014	0.000773307	0.0203815	-1.61237	1.06953e-10	5.98697e-10
gene-LOC133037058	XP_060969860.1	1	uncharacterized LOC133037058	AT1G06740.1	26.38	MuDR family transposase		0.0073824	0	0	0.0060379	0.00818985	0	1	1	0	1	1	0	1	1	0	1	1
gene-LOC133030919	XP_060959952.1	1	uncharacterized LOC133030919	AT1G31150.1	27.04	K-box region protein (DUF1985)		0	0	0	0	0	0	1	1	0	1	1	0	1	1	0	1	1
gene-LOC133030929	XP_060959979.1	1	uncharacterized LOC133030929	AT5G53670.1	37.5	transmembrane protein;start_range=.,21796997		0.0257497	0.0253097	0.090726	0.021133	0.38674	0	1	1	0	1	1	0	1	1	0	1	1
gene-LOC115706408	XP_030489913.2	1	phosphoglucan phosphatase LSF2, chloroplastic	AT3G10940.1	78.71	dual specificity protein phosphatase (DsPTP1) family protein		21.3086	17.8483	16.8672	22.5672	34.8327	-0.262123	0.185352	0.585943	0.0579235	0.755109	0.839269	-0.346668	0.173616	0.718119	0.695394	0.000863026	0.00206904
gene-LOC115703811	XP_060959994.1	1	uncharacterized LOC115703811	AT5G05310.2	68.88	TLC ATP/ADP transporter		1.71322	2.12953	1.93071	1.76574	1.43829	0.316208	0.480619	0.843131	-0.0199968	0.965149	0.978578	0.161056	0.732441	0.985979	-0.265489	0.614295	0.694579
gene-LOC115703808	XP_060959987.1	1	protein GAMETE EXPRESSED 3-like	AT5G16020.1	51.25	gamete-expressed 3		0.0561118	0.0737884	0.0555167	0.193895	0.13728	0	1	1	0	1	1	0	1	1	0	1	1
gene-LOC115705118	XP_030488219.2	1	uncharacterized LOC115705118	AT2G40600.1	70.65	appr-1-p processing enzyme family protein		42.3513	33.6177	33.7504	40.1967	26.0333	-0.338939	0.104792	0.441241	-0.103788	0.556891	0.683231	-0.338988	0.15999	0.699316	-0.714189	0.00319903	0.00691833
gene-LOC115705117	XP_030488217.2	1	CBL-interacting protein kinase 2	AT5G58380.1	60.44	SOS3-interacting protein 1		3.45786	5.22458	5.16316	4.05884	4.52407	0.587543	0.0441884	0.26773	0.206407	0.507037	0.64055	0.565287	0.0889939	0.537194	0.366586	0.287509	0.376824
gene-LOC133037086	XP_060969899.1	1	uncharacterized LOC133037086	AT2G06105.1	23.53			0	0	0	0	0	0	1	1	0	1	1	0	1	1	0	1	1
gene-LOC115706149	XP_030489547.2	1	uroporphyrinogen decarboxylase	AT2G40490.1	81.68	Uroporphyrinogen decarboxylase		121.046	161.312	142.427	47.907	36.9046	0.405825	0.0150915	0.129821	-1.36314	1.32581e-26	6.28741e-25	0.222595	0.37671	0.894212	-1.72817	3.38741e-24	4.52125e-23
gene-LOC115707689	XP_030491577.1	1	5-amino-6-(5-phospho-D-ribitylamino)uracil phosphatase, chloroplastic	AT3G10970.1	71.89	Haloacid dehalogenase-like hydrolase (HAD) superfamily protein		39.6349	44.5928	41.2601	25.0818	25.5444	0.163612	0.329631	0.747906	-0.685295	3.11592e-05	0.000164386	0.0477695	0.841928	0.995797	-0.646449	0.0018312	0.00412728
gene-LOC115704008	XP_030487091.2	1	high mobility group B protein 7	AT5G05330.1	40.86	HMG-box (high mobility group) DNA-binding family protein		2.22642	10.569	16.2647	7.69088	6.95368	2.25165	4.04317e-10	4.06327e-08	1.76822	7.72803e-06	4.58424e-05	2.87071	3.21868e-11	6.43314e-09	1.64696	0.000234466	0.00062155
gene-LOC133037118	XP_060969934.1	1	uncharacterized LOC133037118					0	0	0	0	0	0	1	1	0	1	1	0	1	1	0	1	1
gene-LOC115705033	XP_030488127.2	1	WEB family protein At2g40480	AT2G40480.1	44.46	WEB family protein (DUF827)		19.5514	23.5996	23.8172	15.3135	8.19445	0.26089	0.225896	0.639267	-0.380269	0.0727246	0.144345	0.273394	0.306691	0.855484	-1.26423	8.21605e-07	3.04113e-06
gene-LOC115704875	XP_030487946.1	1	uncharacterized LOC115704875	AT2G40475.1	51.92	hypothetical protein		21.1746	17.9444	16.651	25.2177	7.37329	-0.246039	0.218724	0.632032	0.223748	0.216053	0.340813	-0.360752	0.153684	0.687289	-1.53424	1.78999e-09	8.93601e-09
gene-LOC115706708	XP_030490281.1	1	uncharacterized LOC115706708	AT2G39690.5	47.99	ternary complex factor MIP1 leucine-zipper protein (Protein of unknown function%2C DUF547)		5.15679	2.87992	2.53401	1.38269	0.607573	-0.849728	0.00386399	0.0489798	-1.92351	1.18974e-08	1.11981e-07	-1.03352	0.00233276	0.0487221	-3.08654	1.57796e-11	9.57332e-11
gene-LOC133037167	XP_060970003.1	1	uncharacterized LOC133037167					0	0	0	0	0	0	1	1	0	1	1	0	1	1	0	1	1
gene-LOC115707415	XP_030491232.2	1	16 kDa phloem protein 1	AT3G55470.2	52.63	Calcium-dependent lipid-binding (CaLB domain) family protein		0	0	0	0	1.00685	0	1	1	0	1	1	0	1	1	0	1	1
gene-LOC115708048	XP_030492079.2	1	16 kDa phloem protein 1	AT3G55470.2	52.29	Calcium-dependent lipid-binding (CaLB domain) family protein		0	0.0536495	0.0622355	0	0.118456	0	1	1	0	1	1	0	1	1	0	1	1
gene-LOC115706268	XP_060960060.1	1	serine/arginine-rich SC35-like splicing factor SCL30	AT3G55460.1	75.26	SC35-like splicing factor 30		116.736	98.7675	115.027	78.6562	65.7027	-0.249986	0.0781349	0.373813	-0.602537	3.14846e-06	2.00179e-05	-0.0381481	0.845153	0.995985	-0.854656	5.46178e-07	2.06204e-06
gene-LOC115708179	XP_030492248.2	1	uncharacterized LOC115708179	AT2G39670.1	76.5	Radical SAM superfamily protein		27.6527	30.8354	30.151	17.1022	12.1779	0.150216	0.415123	0.806446	-0.715642	1.60425e-05	8.95332e-05	0.115395	0.613609	0.971293	-1.19791	1.12811e-08	5.17948e-08
gene-LOC115707758	XP_030491673.2	1	receptor-like cytoplasmic kinase 176	AT1G07570.5	70.22	Protein kinase superfamily protein		24.6681	12.9557	14.383	17.5063	16.2788	-0.935586	9.09087e-07	4.49942e-05	-0.518226	0.00295342	0.0094586	-0.786578	0.00103013	0.0255841	-0.614908	0.00657056	0.0133403
gene-LOC115706046	XP_030489407.2	1	triosephosphate isomerase, cytosolic	AT3G55440.1	86.61	triosephosphate isomerase		353.783	351.663	396.434	240.085	298.444	-0.0153577	0.907114	0.981324	-0.587288	4.25093e-07	3.12653e-06	0.15298	0.412578	0.914616	-0.259876	0.108117	0.163597
gene-LOC133037264	XP_060970191.1	1	uncharacterized LOC133037264	AT4G29090.1	29.2	Ribonuclease H-like superfamily protein;start_range=.,14333528		0	0	0.0083472	0.0133034	0	0	1	1	0	1	1	0	1	1	0	1	1
gene-LOC133037276	XP_060970244.1	1	uncharacterized mitochondrial protein AtMg00310-like	AT4G29090.1	34.98	Ribonuclease H-like superfamily protein;start_range=.,14333528		0	0	0	0	0.817392	0	1	1	0	1	1	0	1	1	0	1	1
gene-LOC115706272	XP_030489720.1	1	uncharacterized LOC115706272	AT2G39650.1	59.15	cruciferin (DUF506)		5.75089	6.93983	6.74737	12.7111	22.3842	0.258708	0.30817	0.728283	1.11828	5.13522e-07	3.745e-06	0.215868	0.469279	0.941066	1.94356	5.30379e-16	4.46383e-15
gene-LOC133030967	XP_060960089.1	1	uncharacterized LOC133030967	AT5G13825.1	50.79	hypothetical protein		0	0	0	0	0	0	1	1	0	1	1	0	1	1	0	1	1
gene-LOC115705614	XP_030488858.2	1	glucan endo-1,3-beta-glucosidase	AT3G55430.1	56.65	O-Glycosyl hydrolases family 17 protein		84.352	78.6359	87.4889	100.512	37.6166	-0.108857	0.45208	0.826207	0.228009	0.0641238	0.130277	0.0424683	0.826139	0.995797	-1.1793	6.90619e-12	4.29442e-11
gene-LOC115706390	XP_030489890.2	1	uncharacterized LOC115706390	AT3G55420.1	65.22	hypothetical protein		34.968	39.6018	38.5587	55.8439	35.5322	0.168326	0.385346	0.787346	0.643621	0.000281416	0.00118773	0.125418	0.611595	0.970767	0.00584662	0.979191	0.984936
gene-LOC115703848	XP_060970287.1	1	uncharacterized LOC115703848	AT3G57587.1	26.6	Ta11-like non-LTR retrotransposon;start_range=.,21328263		0	0	0	0	0	0	1	1	0	1	1	0	1	1	0	1	1
gene-LOC115707581	XP_030491453.2	1	uncharacterized LOC115707581	AT2G39630.1	71.34	Nucleotide-diphospho-sugar transferases superfamily protein		13.2477	14.4298	15.1941	13.3059	11.9487	0.117945	0.59446	0.896474	-0.017714	0.930118	0.958148	0.186978	0.472023	0.941081	-0.163892	0.499958	0.590671
gene-LOC115703849	XP_030486939.2	1	epsin-3-like	AT3G46540.1	55.19	ENTH/VHS family protein		0	0	0	0	13.8333	0	1	1	0	1	1	0	1	1	10.13	1.1306e-11	6.92712e-11
gene-LOC115704910	XP_030487989.1	1	actin	AT3G12110.1	97.35	actin-11		179.337	191.067	191.321	135.31	97.0573	0.0844485	0.531487	0.868059	-0.431353	0.000312917	0.00130504	0.0827779	0.678053	0.97978	-0.900379	5.83865e-08	2.48319e-07
gene-LOC115703850	XP_060970380.1	1	CASP-like protein 4D2	AT2G39518.1	55.36	Uncharacterized protein family (UPF0497)		0	0	0	0	0.218293	0	1	1	0	1	1	0	1	1	0	1	1
gene-LOC115703853	XP_030486942.2	1	CASP-like protein 4D1	AT2G39518.1	52.35	Uncharacterized protein family (UPF0497)		0	0	0	0	0.0504885	0	1	1	0	1	1	0	1	1	0	1	1
gene-LOC133037364	XP_060970418.1	1	uncharacterized LOC133037364	AT1G10000.1	27.85	Ribonuclease H-like superfamily protein		0	0	0	0	0	0	1	1	0	1	1	0	1	1	0	1	1
gene-LOC115707613	XP_030491486.1	1	CASP-like protein 4D1	AT2G39518.1	47.65	Uncharacterized protein family (UPF0497)		0.38461	0	0.158333	0	2.07635	0	1	1	0	1	1	0	1	1	0	1	1
gene-LOC115704742	XP_030487809.2	1	dof zinc finger protein DOF3.6	AT3G55370.1	42.01	OBF-binding protein 3	PK23763.1	4.60718	4.45094	4.26443	1.77513	1.28515	-0.0613025	0.849496	0.969248	-1.3952	0.0003676	0.00150475	-0.118187	0.745168	0.989138	-1.8426	0.000230592	0.000611823
gene-LOC115707297	XP_030491067.2	1	uncharacterized LOC115707297	AT5G13590.4	24.74	hypothetical protein		14.2143	13.7278	12.5111	17.7506	27.8626	-0.0535427	0.7244	0.937012	0.303233	0.0333692	0.0762839	-0.187892	0.367066	0.887355	0.96444	1.76464e-06	6.2755e-06
gene-LOC115705194	XP_030488310.2	1	uncharacterized LOC115705194	AT5G59350.3	42.63	transmembrane protein		0.934856	1.13627	1.3977	5.40473	0.130612	0.264317	0.648823	0.915224	2.5024	1.39521e-10	1.73018e-09	0.564253	0.327848	0.867536	-2.85218	0.00413146	0.0087421
gene-LOC115705192	XP_030488309.1	1	geranylgeranyl transferase type-1 subunit beta	AT2G39550.1	69.48	Prenyltransferase family protein		13.3028	11.8054	12.2235	16.9485	32.7627	-0.179839	0.273916	0.694401	0.32583	0.0256414	0.0611103	-0.131144	0.580423	0.967407	1.28374	9.00958e-12	5.55616e-11
gene-LOC115708297	XP_030492386.2	1	uncharacterized LOC115708297	AT3G04020.1	52.12	hypothetical protein		8.76908	8.7656	8.07349	9.52795	7.67268	-0.0119674	0.961716	0.991445	0.0887541	0.735697	0.825238	-0.132058	0.660594	0.978814	-0.205155	0.537593	0.625867
gene-LOC115703835	XP_030486926.2	1	RING-H2 finger protein ATL52-like	AT5G17600.1	49.41	RING/U-box superfamily protein		0.0531085	0.0477163	0	0	0	0	1	1	0	1	1	0	1	1	0	1	1
gene-LOC115703837	XP_030486927.2	1	RING-H2 finger protein ATL47-like	AT1G23980.1	32.9	RING/U-box superfamily protein		0	0.077448	0	0	0.263665	0	1	1	0	1	1	0	1	1	0	1	1
gene-LOC115708143	XP_030492205.1	1	uncharacterized LOC115708143	AT1G72175.1	71.35	E3 ubiquitin-protein ligase RNF170-like protein (DUF 1232)		23.8983	23.5903	22.4478	27.1756	28.2216	-0.0265353	0.901812	0.980751	0.156301	0.445445	0.584825	-0.100504	0.698824	0.980077	0.227585	0.363651	0.456394
gene-LOC133039931	XP_060975049.1	1	CLAVATA3/ESR (CLE)-related protein 46-like					0	0.241937	0.286396	0.0677905	0	0	1	1	0	1	1	0	1	1	0	1	1
gene-LOC115705855	XP_030489161.1	1	ubiquitin-conjugating enzyme E2 7	AT5G59300.1	86.59	ubiquitin-conjugating enzyme E2;start_range=.,23919868		44.615	40.8714	46.7689	29.412	239.654	-0.128719	0.50827	0.85816	-0.627662	0.00130462	0.00461957	0.0594926	0.800724	0.993728	2.41589	4.05957e-32	7.37625e-31
gene-LOC133037410	XP_060970646.1	1	uncharacterized LOC133037410	AT4G29090.1	31.25	Ribonuclease H-like superfamily protein;start_range=.,14333528		0	0	0	0	0	0	1	1	0	1	1	0	1	1	0	1	1
gene-LOC115705854	XP_030489160.1	1	CASP-like protein 4C1	AT3G55390.1	62.14	Uncharacterized protein family (UPF0497)		19.5755	19.6805	25.6448	9.96723	16.7836	-0.00538458	0.981123	0.996924	-1.00517	5.69289e-05	0.000283038	0.373565	0.152822	0.686503	-0.238577	0.386842	0.480262
gene-LOC115704791	XP_030487858.1	1	dolichyl-diphosphooligosaccharide--protein glycosyltransferase subunit 4A	AT3G12587.1	83.78	Oligosaccaryltransferase		134.483	132.369	165.97	113.57	122.834	-0.0223462	0.903143	0.980751	-0.290909	0.11108	0.202713	0.29067	0.25339	0.814146	-0.136571	0.521344	0.610871
gene-LOC133030993	XP_060960153.1	1	uncharacterized LOC133030993	AT3G05850.1	26.53	MuDR family transposase		0	0	0	0	0.0483452	0	1	1	0	1	1	0	1	1	0	1	1
gene-LOC115713636	XP_060960149.1	1	uncharacterized LOC115713636					0.0308308	0.0279067	0	0.0678525	0	0	1	1	0	1	1	0	1	1	0	1	1
gene-LOC133037416	XP_060970696.1	1	uncharacterized LOC133037416					0.0150978	0	0	0	0.0302716	0	1	1	0	1	1	0	1	1	0	1	1
gene-LOC133037440	XP_060970770.1	1	uncharacterized LOC133037440					0	0	0	0	0	0	1	1	0	1	1	0	1	1	0	1	1
gene-LOC115704861	XP_060960161.1	1	uncharacterized LOC115704861	AT3G12590.1	67.71	hypothetical protein		11.5722	10.8871	8.78824	10.9559	10.912	-0.0973856	0.557113	0.881912	-0.10148	0.512863	0.645831	-0.408519	0.0548168	0.421392	-0.100125	0.599314	0.681331
gene-LOC115703838	XP_030486928.1	1	uncharacterized LOC115703838	AT4G20520.1	32.94	RNA binding / RNA-directed DNA polymerase;start_range=.,11045912		0	0	0	0	0	0	1	1	0	1	1	0	1	1	0	1	1
gene-LOC115705912	XP_030489241.2	1	uncharacterized LOC115705912	AT2G39580.2	38.67	zinc finger C3H1 domain protein		8.18388	7.24862	7.79167	7.94472	15.9122	-0.182224	0.274531	0.695465	-0.0622875	0.725403	0.818211	-0.0795655	0.710564	0.9823	0.943582	6.24583e-05	0.000179745
gene-LOC133037482	XP_060970863.1	1	uncharacterized LOC133037482					0	0	0	0	0	0	1	1	0	1	1	0	1	1	0	1	1
gene-LOC115703840	XP_060970947.1	1	uncharacterized LOC115703840	AT1G24090.1	35.03	RNase H family protein		0	0	0	0	0	0	1	1	0	1	1	0	1	1	0	1	1
gene-LOC133031015	XP_060960188.1	1	uncharacterized LOC133031015					0	0	0	0	0	0	1	1	0	1	1	0	1	1	0	1	1
gene-LOC115703841	XP_030486932.2	1	uncharacterized LOC115703841	AT4G29090.1	25.68	Ribonuclease H-like superfamily protein;start_range=.,14333528		0	0	0	0	0	0	1	1	0	1	1	0	1	1	0	1	1
gene-LOC115705537	XP_060960198.1	1	elongator complex protein 1	AT5G13680.1	62.04	IKI3 family protein		18.3715	15.7844	15.9334	18.6368	12.1361	-0.226751	0.1412	0.518512	-0.00107208	0.993896	0.995915	-0.215826	0.299136	0.849617	-0.61319	0.000755353	0.00183022
gene-LOC115705538	XP_030488753.2	1	uncharacterized LOC115705538	AT2G39580.2	43.84	zinc finger C3H1 domain protein		2.78921	2.02454	2.31834	1.68196	4.06337	-0.468492	0.0559013	0.307503	-0.751699	0.00260862	0.00849784	-0.276324	0.41297	0.914616	0.530321	0.0330637	0.0575769
gene-LOC133031020	XP_060960210.1	1	uncharacterized LOC133031020					0	0.0104165	0	0	0.0118782	0	1	1	0	1	1	0	1	1	0	1	1
gene-LOC115704992	XP_030488077.2	1	zinc finger protein ZAT12	AT2G28710.1	43.11	C2H2-type zinc finger family protein	PK27255.1	0.859523	0.704395	0.615725	0.305158	2.29212	0	1	1	0	1	1	0	1	1	1.39444	0.0697619	0.111535
gene-LOC115705891	XP_030489207.2	1	WAT1-related protein At2g39510	AT2G39510.1	58.67	nodulin MtN21 /EamA-like transporter family protein		0.0683597	0.229175	0.109235	0.0851666	13.3177	0	1	1	0	1	1	0	1	1	7.74674	5.3304e-18	5.07109e-17
gene-LOC115705892	XP_030489208.2	1	WAT1-related protein At2g39510	AT2G39510.1	60.88	nodulin MtN21 /EamA-like transporter family protein		0.17901	0.585826	0.731019	0.441	2.28712	0	1	1	0	1	1	0	1	1	3.73127	6.4398e-06	2.14553e-05
gene-LOC115704023	XP_030487105.2	1	transcription factor bHLH114-like	AT3G19500.1	42.62	basic helix-loop-helix (bHLH) DNA-binding superfamily protein		0.113682	0.068958	0.100052	0.761702	0.148694	0	1	1	2.65467	0.00399388	0.0123133	0	1	1	0	1	1
gene-LOC115704024	XP_030487106.1	1	actin-depolymerizing factor 2	AT3G46010.1	80.58	actin depolymerizing factor 1		532.271	537.203	598.075	678.08	614.388	0.00758488	0.954701	0.990526	0.320623	0.0107254	0.0291011	0.157937	0.421103	0.919153	0.195195	0.254664	0.339754
gene-LOC115704021	XP_030487104.2	1	protein ALP1-like	AT3G55350.1	64.71	PIF / Ping-Pong family of plant transposase		1.83359	2.34173	2.80545	2.08283	19.5273	0.345024	0.286038	0.705963	0.163031	0.625529	0.741307	0.603834	0.0800751	0.511755	3.39998	1.24346e-41	3.1529e-40
gene-LOC133037663	XP_060971046.1	1	secreted RxLR effector protein 161-like	AT4G23160.3	40.74	cysteine-rich RECEPTOR-like kinase;start_range=.,12131325		0	0	0	0	0	0	1	1	0	1	1	0	1	1	0	1	1
gene-LOC115707008	XP_030490663.2	1	protein SOSEKI 5	AT5G59790.2	42.42	UPSTREAM OF FLC protein (DUF966)		0.0338787	0.308434	0.159751	0.702468	0.276525	0	1	1	0	1	1	0	1	1	0	1	1
gene-LOC115707046	XP_030490729.2	1	phragmoplastin interacting protein 1	AT3G55340.1	46.31	phragmoplastin interacting protein 1		9.47497	8.79796	7.87823	8.67903	10.5788	-0.113741	0.594743	0.896544	-0.148039	0.496487	0.631241	-0.274346	0.31894	0.863696	0.146392	0.545989	0.633915
gene-LOC133037758	XP_060971235.1	1	uncharacterized LOC133037758	AT2G41590.1	22.27	Ta11-like non-LTR retrotransposon		0	0	0	0	0	0	1	1	0	1	1	0	1	1	0	1	1
gene-LOC115704213	XP_060960260.1	1	receptor-like protein kinase THESEUS 1	AT5G54380.1	52.31	protein kinase family protein		2.92483	1.62385	1.93413	1.60269	0.5312	-0.852816	0.0081401	0.0843883	-0.89735	0.0059623	0.0174502	-0.603276	0.0861948	0.531424	-2.46439	7.22875e-08	3.04268e-07
gene-LOC115704214	XP_030487290.2	1	F-box protein At2g39490	AT2G39490.1	40.05			0.0260464	0.0499591	0.0325245	0.0372213	6.02e-07	0	1	1	0	1	1	0	1	1	0	1	1
gene-LOC115706369	XP_030489848.2	1	photosynthetic NDH subunit of lumenal location 1, chloroplastic	AT2G39470.1	58.02	PsbP-like protein 2		53.3342	78.6792	57.4232	21.647	17.6468	0.546149	0.0060182	0.067742	-1.33281	6.16999e-12	8.95764e-11	0.0922933	0.750215	0.990009	-1.62331	9.87061e-12	6.07048e-11
gene-LOC115706368	XP_030489847.1	1	ABC transporter B family member 6	AT3G55320.1	85.28	P-glycoprotein 20		12.8029	11.3714	12.0938	13.0823	10.6055	-0.180865	0.317834	0.737477	0.00829745	0.95733	0.974147	-0.0938567	0.682224	0.980067	-0.287636	0.140105	0.204702
gene-LOC133037781	XP_060971306.1	1	uncharacterized LOC133037781	AT1G40390.1	29.76			0	0	0	0	0	0	1	1	0	1	1	0	1	1	0	1	1
gene-LOC115703860	XP_060971357.1	1	uncharacterized LOC115703860	AT1G43760.1	29.38			0	0	0	0	0	0	1	1	0	1	1	0	1	1	0	1	1
gene-LOC115707202	XP_030490944.2	1	transcription initiation factor TFIID subunit 6	AT1G04950.3	64.98	TATA BOX ASSOCIATED FACTOR II 59		12.5985	13.2364	12.3248	12.7107	12.7254	0.0638013	0.741977	0.941775	-0.014525	0.938312	0.962568	-0.0446059	0.862118	0.996876	-0.000794273	0.997228	0.997672
gene-LOC115707264	XP_030491033.1	1	spliceosome-associated protein 130 A	AT3G55220.1	88.71	Cleavage and polyadenylation specificity factor (CPSF) A subunit protein		27.2917	31.3457	30.5048	26.4064	27.3031	0.189897	0.263142	0.682637	-0.0703176	0.62217	0.738594	0.148231	0.540586	0.958407	-0.0152805	0.932206	0.951445
gene-LOC115706831	XP_030490442.1	1	caffeoylshikimate esterase	AT2G39420.1	71.06	alpha/beta-Hydrolases superfamily protein		4.16803	2.52223	2.73316	6.59673	14.4183	-0.726533	0.0571816	0.311197	0.63553	0.042748	0.0937155	-0.613165	0.136592	0.653905	1.77806	7.10944e-09	3.33495e-08
gene-LOC115706075	XP_060960277.1	1	protein-tyrosine-phosphatase MKP1	AT3G55270.1	65.8	mitogen-activated protein kinase phosphatase 1		16.6985	18.6086	17.0631	14.6099	11.3235	0.155635	0.347917	0.763292	-0.198469	0.204326	0.326611	0.0293765	0.894065	0.996876	-0.565686	0.0041231	0.00872647
gene-LOC115707986	XP_030491970.2	1	beta-hexosaminidase 1	AT3G55260.1	73.97	beta-hexosaminidase 1		28.252	29.0602	30.252	25.7645	42.1727	0.0339693	0.830215	0.964387	-0.156912	0.283031	0.419299	0.0886341	0.670434	0.9793	0.564534	0.00432507	0.00911416
gene-LOC115705550	XP_030488768.2	1	protein GRIP	AT5G13560.1	60.03	structural maintenance of chromosomes protein		25.5971	27.6349	25.6279	31.5766	19.0983	0.103745	0.51435	0.859936	0.27907	0.0472222	0.101834	-0.00777643	0.970066	0.999246	-0.438055	0.0253156	0.0452835
gene-LOC115707987	XP_060960296.1	1	probable membrane-associated kinase regulator 4	AT2G39370.1	45.42	membrane-associated kinase regulator		5.50042	3.73279	4.14384	2.31254	1.283	-0.564873	0.080106	0.378122	-1.2785	0.000433644	0.00174245	-0.426118	0.233032	0.79772	-2.11287	8.34821e-07	3.08941e-06
gene-LOC115707985	XP_030491968.1	1	ankyrin repeat-containing protein ITN1	AT3G12360.1	79.8	Ankyrin repeat family protein		37.4136	38.2976	34.9884	61.3395	36.7717	0.0256624	0.86521	0.972984	0.689389	6.70904e-08	5.66315e-07	-0.107424	0.60595	0.970504	-0.0395492	0.820175	0.864934
gene-LOC133031064	XP_060960291.1	1	uncharacterized LOC133031064					0	0	0	0	0	0	1	1	0	1	1	0	1	1	0	1	1
gene-LOC115705717	XP_060960299.1	1	3-ketoacyl-CoA synthase 19	AT5G04530.1	62.92	3-ketoacyl-CoA synthase 19		5.974	6.31806	8.91295	34.7721	6.43399	0.0808022	0.766735	0.94863	2.51981	4.0087e-44	4.70736e-42	0.57055	0.0570493	0.430894	0.097595	0.736386	0.798044
gene-LOC133031068	XP_060960305.1	1	exocyst complex component EXO70H1-like	AT2G39380.1	52.61	exocyst subunit exo70 family protein H2		0.0830136	0.170584	0.41856	0.191431	0.156338	0	1	1	0	1	1	0	1	1	0	1	1
gene-LOC133037886	XP_060971628.1	1	uncharacterized LOC133037886					0	0	0	0	0	0	1	1	0	1	1	0	1	1	0	1	1
gene-LOC115707768	XP_030491686.2	1	methionine--tRNA ligase, chloroplastic/mitochondrial	AT3G55400.1	76.79	methionyl-tRNA synthetase / methionine-tRNA ligase / MetRS (cpMetRS)		21.1421	24.0144	21.6949	14.3685	11.1325	0.174829	0.318021	0.737711	-0.582683	0.000534885	0.00210275	0.0264056	0.907114	0.997278	-0.940138	1.30019e-05	4.15543e-05
gene-LOC115707643	XP_030491522.1	1	UDP-glucuronic acid decarboxylase 6	AT2G28760.4	91.02	UDP-XYL synthase 6		35.3556	43.707	46.4448	45.0481	85.3743	0.301944	0.0566174	0.309556	0.337944	0.0192605	0.04791	0.37397	0.0712467	0.48024	1.26388	8.48764e-12	5.2451e-11
gene-LOC115705371	XP_030488557.1	1	UDP-glucuronic acid decarboxylase 6	AT2G28760.4	89.74	UDP-XYL synthase 6		46.8449	53.1847	58.8698	52.8512	98.3723	0.185166	0.228755	0.642974	0.191756	0.171377	0.285413	0.322006	0.128659	0.635867	1.08352	2.41458e-09	1.18986e-08
gene-LOC133037910	XP_060971664.1	1	uncharacterized LOC133037910	AT3G09510.1	22.4	Ribonuclease H-like superfamily protein;start_range=.,2921804		0	0	0	0	0	0	1	1	0	1	1	0	1	1	0	1	1
gene-LOC115706295	XP_030489755.1	1	large ribosomal subunit protein uL29	AT2G39390.1	86.99	Ribosomal L29 family protein		649.841	578.875	759.144	470.753	752.699	-0.171609	0.211523	0.623889	-0.497074	4.01991e-05	0.000206769	0.213171	0.279556	0.835898	0.201393	0.242409	0.325763
gene-LOC115705010	XP_030488100.1	1	psbP-like protein 1, chloroplastic	AT3G55330.1	66.2	PsbP-like protein 1		63.6192	77.724	63.3033	31.2423	24.7084	0.28182	0.0953207	0.419028	-1.05457	4.75264e-11	6.20106e-10	-0.0184664	0.944775	0.997681	-1.37895	1.51147e-11	9.18546e-11
gene-LOC115705011	XP_030488101.1	1	large ribosomal subunit protein uL23	AT3G55280.2	87.66	ribosomal protein L23AB		817.49	886.908	1083.66	628.15	675.252	0.127981	0.357986	0.768431	-0.401883	0.000829658	0.00310326	0.396148	0.0510812	0.406062	-0.283809	0.101193	0.154383
gene-LOC115705469	XP_030488664.2	1	probable sulfate transporter 4.2	AT5G13550.1	77.22	sulfate transporter 4.1		16.0086	13.8628	13.5706	13.7083	13.044	-0.213336	0.241181	0.657877	-0.210859	0.223683	0.349875	-0.290536	0.212655	0.778014	-0.298048	0.173211	0.244591
gene-LOC133031099	XP_060960397.1	1	uncharacterized LOC133031099	AT1G48720.1	60	Copia-like polyprotein/retrotransposon		0	0	0	0	0	0	1	1	0	1	1	0	1	1	0	1	1
gene-LOC133031102	XP_060960401.1	1	uncharacterized LOC133031102	AT3G55240.1	82.56	Plant protein 1589 of unknown function		2.85105	2.06351	3.34739	9.67479	2.99584	-0.483241	0.396919	0.795011	1.7418	3.10343e-06	1.97535e-05	0.233478	0.659237	0.978814	0.0642353	0.907897	0.933374
gene-LOC115706267	XP_030489715.2	1	receptor-like protein kinase HERK 1	AT3G46290.1	48.39	hercules receptor kinase 1		5.1465	2.38789	2.00412	9.65012	5.65688	-1.11515	1.24858e-05	0.000457532	0.88292	8.71212e-06	5.12921e-05	-1.37063	5.67934e-06	0.000292486	0.119995	0.643372	0.71966
gene-LOC115706036	XP_030489396.2	1	ABC transporter G family member 6	AT3G55090.1	73.01	ABC-2 type transporter family protein		10.0525	7.40439	7.55806	9.09766	17.2587	-0.451931	0.0862829	0.395652	-0.169891	0.49389	0.629097	-0.427596	0.1602	0.699421	0.759296	0.230027	0.311256
gene-LOC133031104	XP_060960406.1	1	L10-interacting MYB domain-containing protein-like	AT5G05800.5	29.35	Myb/SANT-like DNA-binding domain protein		0	0	0	0	0.0554995	0	1	1	0	1	1	0	1	1	0	1	1
gene-LOC133037983	XP_060971834.1	1	uncharacterized LOC133037983	AT5G41980.1	36.19	nuclease		0	0	0	0	0.0361262	0	1	1	0	1	1	0	1	1	0	1	1
gene-LOC115707685	XP_060960409.1	1	SAC3 family protein A	AT2G39340.1	52.51	SAC3/GANP/Nin1/mts3/eIF-3 p25 family		15.1573	16.7231	15.4636	17.295	18.3324	0.135659	0.416306	0.806525	0.167409	0.267805	0.402451	0.0191176	0.92734	0.997505	0.260448	0.173832	0.245294
gene-LOC115705561	XP_030488786.1	1	protein MAEA homolog	AT3G55070.1	73.81	LisH/CRA/RING-U-box domains-containing protein		26.3188	24.108	23.897	21.5164	34.273	-0.137999	0.448518	0.82521	-0.315191	0.0658558	0.133053	-0.15103	0.509162	0.950371	0.365515	0.0651517	0.105038
gene-LOC115704826	XP_030487892.1	1	uncharacterized LOC115704826	AT2G39435.6	32.99	Phosphatidylinositol N-acetyglucosaminlytransferase subunit P-like protein;start_range=.,16464806		0	0.104265	0.0974113	0.369839	0.453182	0	1	1	0	1	1	0	1	1	0	1	1
gene-LOC133038007	XP_060971907.1	1	uncharacterized LOC133038007	AT1G43760.1	35.06			0	0	0	0	0	0	1	1	0	1	1	0	1	1	0	1	1
gene-LOC115705441	XP_030488637.1	1	CDP-diacylglycerol--glycerol-3-phosphate 3-phosphatidyltransferase 2	AT2G39290.1	82.23	phosphatidylglycerolphosphate synthase 1		39.0804	41.7626	35.5376	37.88	40.2301	0.0867385	0.595815	0.896942	-0.0706099	0.619727	0.736657	-0.149435	0.506855	0.949601	0.026191	0.884669	0.915364
gene-LOC115704703	XP_060960425.1	1	uncharacterized LOC115704703	AT3G55020.1	69.69	Ypt/Rab-GAP domain of gyp1p superfamily protein		20.0148	19.8765	19.4162	25.0447	19.9765	-0.016765	0.916165	0.982713	0.301762	0.0428454	0.0938695	-0.0529664	0.80111	0.993728	-0.0173967	0.925179	0.946435
gene-LOC115705128	XP_030488228.2	1	two-component response regulator-like PRR37	AT5G02810.1	44.41	pseudo-response regulator 7		2.76575	2.28178	2.54144	4.17368	10.0733	-0.285281	0.379865	0.783684	0.564363	0.039271	0.0874366	-0.130638	0.701308	0.98024	1.85274	1.43943e-11	8.76547e-11
gene-LOC115706690	XP_030490266.1	1	protein TONNEAU 1b	AT3G55005.1	70.83	tonneau 1b (TON1b)		84.4424	78.9082	85.5502	102.833	96.0931	-0.103626	0.522618	0.863382	0.255898	0.0611661	0.125502	0.00839974	0.970241	0.999246	0.173955	0.342597	0.434435
gene-LOC133038014	XP_060971942.1	1	uncharacterized LOC133038014	AT5G28780.1	46.01			0	0	0	0.080392	0	0	1	1	0	1	1	0	1	1	0	1	1
gene-LOC133038029	XP_060971978.1	1	subtilisin-like protease SBT1.4	AT3G14067.1	60	Subtilase family protein		0.0764465	0	0	0	0	0	1	1	0	1	1	0	1	1	0	1	1
gene-LOC115706080	XP_030489456.1	1	zinc finger CCCH domain-containing protein 11	AT2G20280.1	76.49	Zinc finger C-x8-C-x5-C-x3-H type family protein		51.5526	49.4733	46.2716	54.9454	44.4894	-0.0654025	0.683319	0.925289	0.066693	0.640147	0.753378	-0.1654	0.451334	0.935087	-0.226498	0.213652	0.292628
gene-LOC115703869	XP_060972000.1	1	uncharacterized LOC115703869	AT4G29090.1	26.75	Ribonuclease H-like superfamily protein;start_range=.,14333528		0	0	0	0	0	0	1	1	0	1	1	0	1	1	0	1	1
gene-LOC115706264	XP_030489712.2	1	regulator of nonsense transcripts UPF2	AT2G39260.1	72.99	regulator of nonsense transcripts UPF2		28.0729	23.2234	25.5945	25.492	26.8701	-0.280993	0.0514885	0.293224	-0.160314	0.243833	0.374403	-0.143419	0.486353	0.943183	-0.0781136	0.648403	0.723754
gene-LOC115704819	XP_030487886.1	1	probable pectinesterase 53	AT5G19730.1	74.65	Pectin lyase-like superfamily protein		3.71925	6.51883	5.77834	8.93868	5.92733	0.792576	0.0082979	0.085648	1.23452	7.11112e-06	4.24895e-05	0.617988	0.0741777	0.49067	0.654346	0.0566963	0.0928152
gene-LOC115708100	XP_060968391.1	1	probable glutamate carboxypeptidase LAMP1	AT5G19740.1	64.45	Peptidase M28 family protein		5.51351	6.23068	5.1243	5.5334	3.02826	0.169325	0.509897	0.858455	-0.0153776	0.952819	0.971286	-0.116984	0.701247	0.98024	-0.899741	0.00921202	0.018187
gene-LOC115705223	XP_030488351.2	1	serine/threonine-protein kinase VPS15	AT4G29380.1	69.06	protein kinase family protein / WD-40 repeat family protein		10.0217	9.45345	10.2406	10.5526	9.48791	-0.0915898	0.63727	0.911411	0.0547172	0.740649	0.828801	0.021867	0.937959	0.997613	-0.0939153	0.655903	0.73049
gene-LOC115707713	XP_030491603.1	1	uncharacterized LOC115707713					300.509	372.069	347.976	630.331	472.741	0.308174	0.0550094	0.304673	1.03427	4.31201e-14	8.00364e-13	0.202734	0.449717	0.93464	0.646009	0.000280824	0.000735104
gene-LOC115705165	XP_030488271.1	1	arginine--tRNA ligase, chloroplastic/mitochondrial	AT4G26300.5	75.58	Arginyl-tRNA synthetase%2C class Ic;start_range=.,13308400		55.3075	65.3389	63.2711	48.9708	42.3392	0.229337	0.115059	0.463855	-0.203111	0.115347	0.208932	0.176336	0.38395	0.89967	-0.401205	0.0194693	0.0357667
gene-LOC115705166	XP_030488275.1	1	protein OXIDATIVE STRESS 3	AT5G56550.1	54.76	oxidative stress 3		5.34702	3.71066	4.05553	7.86979	4.81935	-0.541543	0.18024	0.578276	0.512546	0.152724	0.260427	-0.424571	0.337307	0.873477	-0.171693	0.692028	0.762118
gene-LOC115704245	XP_030487320.2	1	mitogen-activated protein kinase kinase 6	AT5G56580.1	83.66	MAP kinase kinase 6		11.5687	12.1302	13.0518	6.21781	206.143	0.0607852	0.781564	0.950998	-0.92356	0.000135226	0.000615254	0.161453	0.530621	0.956359	4.13788	6.1415e-114	9.34341e-112
gene-LOC115706914	XP_030490546.1	1	glucan endo-1,3-beta-glucosidase 13	AT5G56590.1	72.1	O-Glycosyl hydrolases family 17 protein		41.3462	45.7674	51.4502	44.5686	10.4193	0.138227	0.397143	0.795011	0.0827431	0.586539	0.70808	0.303661	0.156029	0.690996	-2.00536	5.6428e-22	6.76684e-21
gene-LOC115705229	XP_030488357.1	1	profilin	AT2G19770.1	77.61	profilin 5		266.511	258.82	299.83	315.337	235.675	-0.0499178	0.720067	0.935188	0.211582	0.0995693	0.186276	0.157408	0.471843	0.941081	-0.191614	0.243848	0.327417
gene-LOC115708352	XP_030492464.1	1	profilin-4	AT4G29340.1	82.09	profilin 4		23.7558	25.4031	22.8716	23.9068	19.381	0.0849889	0.703784	0.929773	-0.0246301	0.916883	0.949686	-0.0710633	0.792597	0.993364	-0.316421	0.704398	0.772377
gene-LOC115708209	XP_030492281.1	1	derlin-1	AT4G29330.1	71.16	DERLIN-1		32.4663	25.3283	26.9416	32.3481	96.3682	-0.36651	0.0439762	0.267448	-0.0344286	0.837185	0.89811	-0.281167	0.216662	0.781215	1.55481	1.44206e-17	1.33511e-16
gene-LOC115705835	XP_030489139.1	1	uncharacterized LOC115705835	AT4G29310.1	68.75	DUF1005 family protein (DUF1005)		22.3665	15.2225	9.14218	35.5408	22.8332	-0.598164	0.00330867	0.0434162	0.617048	0.000316128	0.00131621	-1.27627	2.34151e-06	0.000133713	0.0108671	0.960399	0.971165
gene-LOC133038372	XP_060972490.1	1	uncharacterized LOC133038372	AT2G02520.1	27.07	RNA-directed DNA polymerase (reverse transcriptase)-related family protein;start_range=.,676771		0	0	0	0	0	0	1	1	0	1	1	0	1	1	0	1	1
gene-LOC115705442	XP_030488638.1	1	acid phosphatase 1	AT5G51260.1	53.15	HAD superfamily%2C subfamily IIIB acid phosphatase		64.0864	59.8083	56.3028	56.8149	78.7884	-0.105297	0.50064	0.854233	-0.199757	0.170389	0.284014	-0.196575	0.341841	0.874678	0.285543	0.113261	0.170647
gene-LOC115705443	XP_030488639.1	1	leucine-rich repeat extensin-like protein 6	AT2G19780.1	69.41	Leucine-rich repeat (LRR) family protein		44.2571	31.7568	26.7805	68.1187	23.3702	-0.486953	0.00161211	0.025355	0.596562	1.31212e-05	7.44817e-05	-0.73543	0.000383779	0.0112112	-0.93558	6.37133e-07	2.38189e-06
gene-LOC115713355	XP_060972602.1	1	uncharacterized LOC115713355					0	0	0	0	0	0	1	1	0	1	1	0	1	1	0	1	1
gene-LOC115706028	XP_030489387.1	1	phosphatidylglycerophosphate phosphatase PTPMT2	AT2G35680.1	54.45	Phosphotyrosine protein phosphatases superfamily protein		28.2486	28.0199	28.5233	27.4598	63.5079	-0.0202281	0.910857	0.982679	-0.0681285	0.680259	0.783989	0.00204925	0.992667	0.999496	1.15384	5.80712e-10	3.02611e-09
gene-LOC115704983	XP_030488064.1	1	NAC domain-containing protein 75	AT4G29230.2	58.87	NAC domain containing protein 75		2.7977	3.59096	3.4993	5.8175	1.87989	0.37906	0.220362	0.633829	1.05113	0.00014095	0.000638939	0.27038	0.447523	0.933751	-0.591078	0.145737	0.211501
gene-LOC115704985	XP_030488073.2	1	mitochondrial-processing peptidase subunit alpha	AT1G51980.1	63.71	Insulinase (Peptidase family M16) protein		70.0892	84.7148	87.3515	65.3995	86.5768	0.264846	0.0821946	0.384361	-0.124878	0.33056	0.470453	0.306007	0.140368	0.663022	0.289371	0.0841072	0.131501
gene-LOC115707166	XP_030490892.2	1	nudix hydrolase 8	AT5G47240.1	56.67	nudix hydrolase homolog 8		0.0284253	0.0856242	0	0	0	0	1	1	0	1	1	0	1	1	0	1	1
gene-LOC115705721	XP_030488994.2	1	ATP-dependent 6-phosphofructokinase 6	AT4G26270.1	82.87	phosphofructokinase 3		22.8117	23.4689	21.0071	20.1482	12.8339	0.0335588	0.848026	0.96908	-0.204318	0.206657	0.329578	-0.130172	0.589288	0.968773	-0.842203	8.26693e-05	0.000233272
gene-LOC115705001	XP_030488091.2	1	AP-4 complex subunit sigma	AT2G19790.1	91.61	SNARE-like superfamily protein		38.6723	40.0491	43.5797	41.2024	51.2329	0.0447436	0.81511	0.959676	0.0620936	0.731499	0.822722	0.161298	0.499415	0.947942	0.394934	0.0729059	0.116023
gene-LOC115705000	XP_030488088.2	1	glutathione hydrolase 3	AT4G29210.1	66.31	gamma-glutamyl transpeptidase 4		14.3074	12.6728	11.4245	13.6438	8.82891	-0.165131	0.384311	0.78661	-0.0769468	0.671313	0.77721	-0.361679	0.133618	0.649671	-0.706746	0.00208737	0.00466425
gene-LOC133038664	XP_060972733.1	1	inactive protein RESTRICTED TEV MOVEMENT 2-like					0	0	0	0	0	0	1	1	0	1	1	0	1	1	0	1	1
gene-LOC133031146	XP_060960541.1	1	ubiquitin-conjugating enzyme E2 13-like	AT3G46460.3	86.54	ubiquitin-conjugating enzyme 13		0.48033	1.19544	1.08734	0.51528	4.91995	0	1	1	0	1	1	0	1	1	0	1	1
gene-LOC115705182	XP_030488292.2	1	uncharacterized LOC115705182	AT5G11700.2	64.2	ephrin type-B receptor		13.7835	14.0739	12.6366	13.6796	12.5382	0.0236365	0.888181	0.978077	-0.00843837	0.956998	0.973981	-0.128418	0.578559	0.967184	-0.150441	0.460396	0.552768
gene-LOC133038673	XP_060972800.1	1	uncharacterized mitochondrial protein AtMg00810-like	AT4G23160.3	28.68	cysteine-rich RECEPTOR-like kinase;start_range=.,12131325		0	0	0	0	0	0	1	1	0	1	1	0	1	1	0	1	1
gene-LOC115705058	XP_030488158.2	1	inositol oxygenase 4	AT4G26260.2	73.37	myo-inositol oxygenase 4		31.5358	61.6078	110.19	62.8647	37.9926	0.956096	5.83208e-07	3.04922e-05	0.965105	2.44139e-07	1.8722e-06	1.79141	3.47544e-11	6.78479e-09	0.25238	0.270526	0.357989
gene-LOC115703998	XP_030487082.2	1	probable inactive purple acid phosphatase 1	AT2G03450.1	37.74	purple acid phosphatase 9		0	0	0	0	0.142685	0	1	1	0	1	1	0	1	1	0	1	1
gene-LOC133038774	XP_060973067.1	1	protein FAR1-RELATED SEQUENCE 9-like	AT2G27110.2	24.36	FAR1-related sequence 3		0	0	0	0	0	0	1	1	0	1	1	0	1	1	0	1	1
gene-LOC133031151	XP_060960549.1	1	uncharacterized LOC133031151	AT3G06910.1	24.52	UB-like protease 1A		0	0	0	0	0	0	1	1	0	1	1	0	1	1	0	1	1
gene-LOC133038795	XP_060973107.1	1	uncharacterized LOC133038795					0	0	0	0	0	0	1	1	0	1	1	0	1	1	0	1	1
gene-LOC115706128	XP_030489524.2	1	zinc finger CCCH domain-containing protein 20	AT4G29190.1	59.08	Zinc finger C-x8-C-x5-C-x3-H type family protein	PK14631.1	65.4193	65.8842	77.9712	95.2335	46.4004	0.00118139	0.994234	0.998437	0.515364	0.000421915	0.00170365	0.240542	0.256897	0.818105	-0.512923	0.0124495	0.0238827
gene-LOC115706130	XP_030489526.2	1	transcription factor RAX2	AT2G36890.1	80.67	Duplicated homeodomain-like superfamily protein	PK14382.1	1.91695	1.45487	1.88005	5.32891	9.10841	-0.412017	0.386779	0.788546	1.4522	2.8829e-05	0.0001535	-0.042516	0.931105	0.997607	2.23742	3.88987e-11	2.26798e-10
gene-LOC115706123	XP_030489517.1	1	probable LRR receptor-like serine/threonine-protein kinase At4g29180	AT4G29180.3	54.88	root hair specific 16		2.50889	3.60013	3.20925	10.3013	2.87959	0.515224	0.0528861	0.298148	2.01827	7.36416e-22	2.52222e-20	0.345972	0.26993	0.829549	0.185867	0.559325	0.645931
gene-LOC133038822	XP_060973171.1	1	uncharacterized LOC133038822	AT3G05850.1	29.57	MuDR family transposase		0	0	0	0	0	0	1	1	0	1	1	0	1	1	0	1	1
gene-LOC133038855	XP_060973268.1	1	uncharacterized LOC133038855					0	0	0	0	0	0	1	1	0	1	1	0	1	1	0	1	1
gene-LOC115706132	XP_030489530.2	1	meiotic nuclear division protein 1 homolog	AT4G29170.1	77.67	Mnd1 family protein		9.83387	8.79663	8.30417	7.08187	76.7078	-0.16466	0.587593	0.894179	-0.506818	0.0984293	0.18455	-0.251154	0.517247	0.953978	2.95208	6.28914e-36	1.31282e-34
gene-LOC115706131	XP_030489528.1	1	vacuolar protein sorting-associated protein 32 homolog 2	AT4G29160.3	89.04	SNF7 family protein		70.7157	73.2702	76.3357	75.8072	102.635	0.0601781	0.685717	0.925484	0.0736914	0.577084	0.699765	0.106507	0.590892	0.968773	0.507222	0.0028566	0.00623335
gene-LOC133031165	XP_060960576.1	1	uncharacterized LOC133031165					0	0	0	0	0.006119	0	1	1	0	1	1	0	1	1	0	1	1
gene-LOC133028955	XP_060973327.1	1	uncharacterized LOC133028955	AT5G45570.2	28	Ulp1 protease family protein;start_range=.,18472301		0	0	0	0	0	0	1	1	0	1	1	0	1	1	0	1	1
gene-LOC115708994	XP_060973375.1	1	protein ALP1-like	AT5G41980.1	36.57	nuclease		0.030286	0	0	0	0.101886	0	1	1	0	1	1	0	1	1	0	1	1
gene-LOC115711326	XP_060973430.1	1	uncharacterized protein At2g29880-like	AT4G02210.2	27.49	Myb/SANT-like DNA-binding domain protein		0	0	0	0	0	0	1	1	0	1	1	0	1	1	0	1	1
gene-LOC115704825	XP_060960578.1	1	IAA-amino acid hydrolase ILR1-like 4	AT1G51760.1	60.27	peptidase M20/M25/M40 family protein		1.25908	1.82481	2.05299	6.87002	3.52557	0.518571	0.125704	0.485766	2.41733	3.28557e-23	1.23295e-21	0.690497	0.0578902	0.433119	1.45995	6.4913e-06	2.1612e-05
gene-LOC115704114	XP_060960581.1	1	serpin-ZXA-like	AT1G47710.1	39.11	Serine protease inhibitor (SERPIN) family protein		0	0	0	0.168966	0.628515	0	1	1	0	1	1	0	1	1	0	1	1
gene-LOC133039951	XP_060975082.1	1	uncharacterized LOC133039951					0.035611	0	0	0	0.106235	0	1	1	0	1	1	0	1	1	0	1	1
gene-LOC115704116	XP_060973471.1	1	uncharacterized LOC115704116	AT1G06740.1	26.32	MuDR family transposase		0	0	0	0	0.0182808	0	1	1	0	1	1	0	1	1	0	1	1
gene-LOC115713565	XP_060960597.1	1	uncharacterized LOC115713565					0.175454	0.0925149	0.0444849	0.0765889	0.147763	0	1	1	0	1	1	0	1	1	0	1	1
gene-LOC133038904	XP_060973519.1	1	uncharacterized LOC133038904	AT3G05850.1	42.86	MuDR family transposase		0.073316	0	0.0338687	0.296384	0.109565	0	1	1	0	1	1	0	1	1	0	1	1
gene-LOC115704117	XP_060960614.1	1	serpin-Z3-like	AT2G26390.1	30.25	Serine protease inhibitor (SERPIN) family protein		0	0	0	0	116.91	0	1	1	0	1	1	0	1	1	14.0575	4.07972e-22	4.95864e-21
gene-LOC115704118	XP_060975084.1	1	serpin-ZX-like	AT1G47710.1	35.45	Serine protease inhibitor (SERPIN) family protein		0	0	0.0504955	0	1.08975	0	1	1	0	1	1	0	1	1	0	1	1
gene-LOC115705113	XP_030488212.2	1	serpin-ZXA	AT1G47710.1	38.37	Serine protease inhibitor (SERPIN) family protein		0.0441789	0.0211292	0.122481	0.772231	2.4742	0	1	1	4.18882	0.00186283	0.00631503	0	1	1	5.8783	5.99225e-07	2.24766e-06
gene-LOC115707110	XP_030490820.2	1	uncharacterized LOC115707110	AT3G31430.1	37.29	zinc knuckle (CCHC-type) family protein;start_range=.,12795861		0.0141265	0	0	0	0.284023	0	1	1	0	1	1	0	1	1	0	1	1
gene-LOC133038957	XP_060973674.1	1	serpin-ZXA-like	AT2G25240.1	40.93	Serine protease inhibitor (SERPIN) family protein		0	0	0	0	0	0	1	1	0	1	1	0	1	1	0	1	1
gene-LOC115705176	XP_030488287.2	1	uncharacterized LOC115705176	AT4G26240.1	63.28	histone-lysine N-methyltransferase		7.07092	6.82866	5.64466	6.5816	130.224	-0.0390683	0.892754	0.979043	-0.141493	0.615868	0.733452	-0.286824	0.399913	0.9079	4.23485	8.09868e-99	8.70584e-97
gene-LOC115705881	XP_030489190.1	1	large ribosomal subunit protein eL31	AT2G19740.1	86.55	Ribosomal protein L31e family protein		771.653	720.991	821.393	674.635	579.104	-0.10344	0.480497	0.843131	-0.209428	0.113785	0.206559	0.0580087	0.78835	0.992996	-0.436966	0.0248915	0.0446183
gene-LOC115705171	XP_030488279.1	1	zinc protease PQQL-like	AT5G56730.1	75.42	Insulinase (Peptidase family M16) protein;start_range=.,22946906		11.59	12.6453	13.9905	14.1565	18.9945	0.123048	0.466666	0.835272	0.269523	0.0897615	0.171268	0.244335	0.258523	0.818809	0.679013	0.00045748	0.00115428
gene-LOC115705175	XP_030488285.1	1	F-box/LRR-repeat protein At4g29420-like	AT4G29420.1	44.93	F-box/RNI-like superfamily protein		0.721358	1.31458	0.798727	1.86071	1.50325	0.850569	0.224759	0.638402	1.33085	0.0435941	0.0952558	0.0874043	0.923355	0.997387	1.03756	0.172768	0.2441
gene-LOC115705173	XP_030488281.2	1	uncharacterized LOC115705173					8.44707	8.25085	7.71806	10.358	6.43447	-0.0421368	0.85324	0.970317	0.271176	0.197322	0.318593	-0.140703	0.600309	0.969417	-0.408265	0.129797	0.191984
gene-LOC133038997	XP_060973752.1	1	uncharacterized LOC133038997	AT3G24255.1	40	RNA-directed DNA polymerase (reverse transcriptase)-related family protein		0	0	0	0	0.0474996	0	1	1	0	1	1	0	1	1	0	1	1
gene-LOC115705174	XP_030488283.2	1	F-box/LRR-repeat protein At4g29420	AT4G29420.1	47.33	F-box/RNI-like superfamily protein		2.30938	2.68074	2.52366	3.50976	2.12001	0.216724	0.562387	0.884089	0.584407	0.102235	0.190006	0.122795	0.776501	0.992834	-0.123138	0.782739	0.834952
gene-LOC115704229	XP_030487306.2	1	uncharacterized LOC115704229					7.98779	8.39483	8.99035	9.73159	6.37216	0.0644112	0.780238	0.950998	0.261478	0.23597	0.365156	0.157852	0.548971	0.963583	-0.340405	0.20453	0.281769
gene-LOC115703570	XP_030486658.1	1	small ribosomal subunit protein uS8my	AT4G29430.1	80.62	ribosomal protein S15A E		37.3743	46.0793	52.931	37.132	89.3647	0.298514	0.131727	0.499273	-0.0404353	0.83762	0.898409	0.49391	0.0783888	0.505095	1.24978	4.153e-07	1.58999e-06
gene-LOC115705181	XP_030488291.1	1	uncharacterized LOC115705181	AT2G19710.1	50.94	Regulator of Vps4 activity in the MVB pathway protein		4.17115	4.02736	3.4086	5.79458	16.2826	-0.0608165	0.785446	0.952945	0.449591	0.0290612	0.0677912	-0.303183	0.289911	0.843556	1.94716	2.47326e-20	2.70732e-19
gene-LOC115704661	XP_030487722.1	1	probable phospholipase A2 homolog 1	AT4G29460.1	46.76	Phospholipase A2 family protein		6.67559	5.12674	3.67017	3.66993	14.5839	-0.383013	0.27088	0.691223	-0.920513	0.0149534	0.0385839	-0.879413	0.0341256	0.319361	1.10828	0.00244624	0.00540424
gene-LOC115704232	XP_060973877.1	1	uncharacterized LOC115704232	AT2G14830.1	48.99	Ist1p		0	0	0	0	1.32593	0	1	1	0	1	1	0	1	1	7.83794	9.97182e-07	3.65409e-06
gene-LOC115704233	XP_060960678.1	1	uncharacterized LOC115704233	AT2G14830.1	52.94	Ist1p		0	0	0	0	0	0	1	1	0	1	1	0	1	1	0	1	1
gene-LOC133031236	XP_060960675.1	1	uncharacterized LOC133031236					0	0	0	0	0.971379	0	1	1	0	1	1	0	1	1	0	1	1
gene-LOC115704234	XP_060973927.1	1	uncharacterized LOC115704234	AT2G14830.1	47.83	Ist1p		0	0	0	0	1.11891	0	1	1	0	1	1	0	1	1	7.40287	8.09145e-06	2.65715e-05
gene-LOC115704235	XP_060975095.1	1	uncharacterized LOC115704235	AT2G14830.1	52.94	Ist1p		0	0	0	0	0	0	1	1	0	1	1	0	1	1	0	1	1
gene-LOC115705183	XP_030488294.1	1	uncharacterized LOC115705183	AT2G19680.2	81.82	Mitochondrial ATP synthase subunit G protein		102.629	110.743	130.834	105.241	127.296	0.10407	0.497074	0.8526	0.00408438	0.977822	0.985912	0.33884	0.110312	0.595126	0.29879	0.120638	0.180189
gene-LOC115710771	XP_060974012.1	1	uncharacterized LOC115710771					0	0	0	0	0	0	1	1	0	1	1	0	1	1	0	1	1
gene-LOC115710770	XP_030494982.2	1	uncharacterized LOC115710770					0	0	0	0	0	0	1	1	0	1	1	0	1	1	0	1	1
gene-LOC115704963	XP_030488037.2	1	1-aminocyclopropane-1-carboxylate synthase 7	AT4G26200.1	78.47	1-amino-cyclopropane-1-carboxylate synthase 7		0.082272	0.114982	0.058705	0.0620355	2.41402	0	1	1	0	1	1	0	1	1	4.98293	8.5613e-08	3.57175e-07
gene-LOC115705853	XP_030489159.2	1	uncharacterized LOC115705853	AT4G29490.1	77.8	Metallopeptidase M24 family protein		40.3769	42.3371	46.223	55.0493	65.9769	0.0616527	0.699416	0.928047	0.423028	0.00293425	0.00940769	0.185004	0.370582	0.889068	0.694508	0.000119221	0.000329626
gene-LOC115706111	XP_030489498.2	1	probable protein arginine N-methyltransferase 1.2	AT4G29510.1	74.07	arginine methyltransferase 11		60.3471	63.4882	68.7118	45.8051	35.5734	0.0659557	0.654318	0.916465	-0.423151	0.00217967	0.0072636	0.176352	0.374853	0.893225	-0.776497	2.32286e-05	7.12821e-05
gene-LOC115706834	XP_030490444.2	1	uncharacterized LOC115706834	AT4G29520.1	67.04	nucleophosmin		42.6431	22.9293	20.8631	24.8417	20.7336	-0.902915	4.26389e-06	0.000178012	-0.807477	3.4907e-06	2.19914e-05	-1.04306	3.33115e-05	0.0014267	-1.05725	9.1068e-07	3.35148e-06
gene-LOC133031256	XP_060960700.1	1	receptor-like protein EIX2	AT2G34930.1	41.1	disease resistance family protein / LRR family protein		0	0	0	0	0	0	1	1	0	1	1	0	1	1	0	1	1
gene-LOC115704060	XP_060960695.1	1	receptor-like protein EIX1	AT2G34930.1	33.59	disease resistance family protein / LRR family protein		0	0	0	0	0	0	1	1	0	1	1	0	1	1	0	1	1
gene-LOC133031260	XP_060960705.1	1	uncharacterized LOC133031260	AT1G31150.1	24.56	K-box region protein (DUF1985)		0.0240706	0.063568	0.0223047	0.0709464	0	0	1	1	0	1	1	0	1	1	0	1	1
gene-LOC133039229	XP_060974066.1	1	uncharacterized LOC133039229	AT5G28235.1	27.34	Ulp1 protease family protein;start_range=.,10201271		0	0	0	0	0	0	1	1	0	1	1	0	1	1	0	1	1
gene-LOC115707791	XP_030491721.2	1	uncharacterized LOC115707791	AT5G11780.1	27.49	SNF2 domain protein		13.9916	11.6547	12.1991	10.0503	27.0778	-0.27208	0.157204	0.542927	-0.503643	0.00744715	0.0211888	-0.207833	0.395212	0.904335	0.936636	2.48387e-06	8.70738e-06
gene-LOC115707275	XP_060960730.1	1	pentatricopeptide repeat-containing protein At3g49170, chloroplastic-like	AT2G27610.1	37.58	Tetratricopeptide repeat (TPR)-like superfamily protein;start_range=.,11783927		3.11931	3.53873	3.68299	3.18705	4.9474	0.172657	0.481119	0.843318	0.00351373	0.989169	0.99303	0.224693	0.46918	0.941066	0.645768	0.0158205	0.0296709
gene-LOC115704723	XP_030487788.2	1	receptor-like protein EIX2	AT2G34930.1	32.69	disease resistance family protein / LRR family protein		0.0839506	0.0784171	0.138975	0.35172	3.25807	0	1	1	1.9796	0.0206699	0.0508919	0	1	1	5.20912	3.76332e-21	4.31963e-20
gene-LOC133031283	XP_060960741.1	1	uncharacterized LOC133031283	AT5G45570.2	22.89	Ulp1 protease family protein;start_range=.,18472301		0	0.0293082	0	0	0.066704	0	1	1	0	1	1	0	1	1	0	1	1
gene-LOC115703921	XP_060960745.1	1	receptor-like protein EIX2	AT2G34930.1	33.6	disease resistance family protein / LRR family protein		0.0911163	0.131194	0.108479	0.24452	0.509595	0	1	1	0	1	1	0	1	1	2.45514	0.00895155	0.0177371
gene-LOC115703633	XP_030486729.2	1	receptor-like protein EIX1	AT2G34930.1	33.73	disease resistance family protein / LRR family protein		1.4392	0.718029	1.0206	1.15451	1.82904	-1.02447	0.0134786	0.120134	-0.334984	0.37441	0.515314	-0.518777	0.238724	0.804171	0.330565	0.421269	0.514535
gene-LOC115706348	XP_030489828.2	1	uncharacterized LOC115706348	AT5G11560.1	65.99	catalytics		6.34108	5.48883	5.44313	7.2096	7.07067	-0.216286	0.288713	0.708298	0.162663	0.379624	0.520498	-0.229312	0.353644	0.879383	0.142326	0.553769	0.640822
gene-LOC115706032	XP_030489393.2	1	protein NDL1	AT5G56750.1	81.1	N-MYC downregulated-like 1		34.1438	26.2415	26.0431	29.8547	21.824	-0.38788	0.0170743	0.14172	-0.218336	0.13835	0.24111	-0.400916	0.0667257	0.462916	-0.660556	0.000553799	0.00137565
gene-LOC115706703	XP_030490277.2	1	thiamine phosphate phosphatase-like protein	AT4G29530.1	62.96	Pyridoxal phosphate phosphatase-related protein		16.0399	18.1049	17.8937	24.5912	47.358	0.185151	0.360231	0.770356	0.560455	0.00255283	0.00833969	0.144972	0.561902	0.965903	1.53506	3.11339e-13	2.14144e-12
gene-LOC115703574	XP_030486661.1	1	mitochondrial carrier protein CoAc2	AT4G26180.1	73.75	Mitochondrial substrate carrier family protein		7.57776	6.94921	7.87142	7.28627	25.8278	-0.132258	0.517941	0.862288	-0.078469	0.680302	0.783989	0.0454567	0.850365	0.996523	1.75299	6.89705e-18	6.52006e-17
gene-LOC115703573	XP_030486660.2	1	pentatricopeptide repeat-containing protein At2g15690, mitochondrial-like	AT2G15690.1	55.35	Tetratricopeptide repeat (TPR)-like superfamily protein		14.0591	12.9212	12.4977	2.2368	1.5565e-07	-0.125381	0.595106	0.896849	-2.66876	1.78346e-18	4.82336e-17	-0.176607	0.584009	0.967735	-10.8605	1.82471e-13	1.27758e-12
gene-LOC115706566	XP_030490115.2	1	serine acetyltransferase 5	AT5G56760.1	78.39	serine acetyltransferase 1%3B1		20.673	19.7863	17.5073	22.9162	34.6955	-0.0726779	0.706342	0.93079	0.122155	0.496395	0.631241	-0.25107	0.311962	0.858106	0.731044	0.000642895	0.00157646
gene-LOC115705661	XP_030488919.2	1	protein EFFECTOR OF TRANSCRIPTION 2	AT5G56780.1	45.12	effector of transcription2	PK07450.1	14.2177	10.3716	10.5689	12.9991	15.8122	-0.461451	0.0368795	0.236601	-0.153056	0.469978	0.607743	-0.437531	0.0958286	0.55459	0.139811	0.55908	0.64569
gene-LOC115705231	XP_030488360.2	1	inactive protein kinase SELMODRAFT_444075	AT3G13690.3	63.33	kinase with adenine nucleotide alpha hydrolases-like domain-containing protein		31.8421	27.9429	21.2576	59.0776	14.1089	-0.1954	0.199232	0.606026	0.869019	3.05103e-11	4.08587e-10	-0.591913	0.00400306	0.0736923	-1.1886	2.77583e-10	1.49375e-09
gene-LOC115694972	XP_030477934.2	1	uncharacterized LOC115694972					0	0	0	0	0	0	1	1	0	1	1	0	1	1	0	1	1
gene-LOC115705232	XP_030488361.2	1	probable acyl-[acyl-carrier-protein]--UDP-N-acetylglucosamine O-acyltransferase, mitochondrial	AT4G29540.2	69.33	bacterial transferase hexapeptide repeat-containing protein		7.81965	8.24543	8.48333	9.93137	5.98054	0.0769046	0.755467	0.944988	0.328297	0.171882	0.285978	0.109566	0.704187	0.980721	-0.445386	0.137741	0.201945
gene-LOC115702108	XP_030485425.2	1	transcription factor MYB1R1	AT5G56840.1	54.37	myb-like transcription factor family protein	PK11714.1	36.9885	34.1868	31.9938	4.66395	4.66267	-0.120525	0.461589	0.832278	-3.0071	1.28434e-56	2.57793e-54	-0.218865	0.314523	0.859738	-3.00194	9.86497e-42	2.51557e-40
gene-LOC115706930	XP_030490567.2	1	K(+) efflux antiporter 4	AT2G19600.1	81.4	K+ efflux antiporter 4		13.2834	11.8193	11.2327	8.51574	19.7964	-0.171749	0.382064	0.78459	-0.666135	0.000358312	0.00147021	-0.257731	0.288818	0.842914	0.553415	0.00945525	0.0186099
gene-LOC115702109	XP_030485426.2	1	1-aminocyclopropane-1-carboxylate oxidase 1	AT2G19590.1	69.23	ACC oxidase 1		0.874234	0.411714	0.315756	0.850429	1.87813	0	1	1	-0.0594542	0.941112	0.96418	0	1	1	1.08805	0.132173	0.19505
gene-LOC115704973	XP_030488055.2	1	uncharacterized LOC115704973	AT4G29560.1	52.06	fanconi anemia group E protein FANCE protein		1.28672	1.13353	1.40056	0.882318	2.31006	-0.181635	0.666761	0.920426	-0.577689	0.213618	0.33827	0.120222	0.784239	0.992996	0.833917	0.0397935	0.0678096
gene-LOC115702111	XP_030485428.1	1	tetraspanin-2	AT2G19580.1	73.33	tetraspanin2		22.7492	32.2536	29.454	46.5506	41.2932	0.494195	0.00877316	0.0891283	1.00544	4.01871e-09	4.04732e-08	0.358941	0.14335	0.6689	0.842825	0.000439121	0.00111171
gene-LOC133039366	XP_060974245.1	1	zinc finger BED domain-containing protein RICESLEEPER 2-like	AT3G42170.2	31.03	BED zinc finger and hAT dimerization domain-containing protein DAYSLEEPER		0	0	0	0	0	0	1	1	0	1	1	0	1	1	0	1	1
gene-LOC133039470	XP_060974384.1	1	uncharacterized LOC133039470	AT1G43760.1	25.32			0	0	0	0	0	0	1	1	0	1	1	0	1	1	0	1	1
gene-LOC115705713	XP_030488986.2	1	cytidine deaminase 1	AT2G19570.1	62.75	cytidine deaminase 1		22.1582	21.2612	17.5084	24.3902	51.4725	-0.0667599	0.74345	0.941785	0.111907	0.55415	0.68103	-0.350368	0.190292	0.74312	1.20061	6.11765e-07	2.29182e-06
gene-LOC115705874	XP_030489181.2	1	thioredoxin-like 2, chloroplastic	AT4G29670.1	69.04	atypical CYS HIS rich thioredoxin 2		37.6512	48.2576	39.5515	23.3704	22.0443	0.351765	0.0372898	0.238426	-0.713568	2.77014e-05	0.000148136	0.0607988	0.788013	0.992996	-0.786142	0.000240613	0.000636436
gene-LOC115706840	XP_030490449.2	1	uncharacterized LOC115706840	AT4G29680.1	70.24	Alkaline-phosphatase-like family protein		18.3269	17.7268	16.4798	25.2502	15.0978	-0.0561659	0.780708	0.950998	0.435473	0.0181963	0.045648	-0.166797	0.554651	0.96417	-0.295956	0.244931	0.328704
gene-LOC115708306	XP_030492395.2	1	enhanced ethylene response protein 5	AT2G19560.1	80.63	proteasome family protein		13.583	14.9515	14.2438	14.7594	18.2869	0.132332	0.506459	0.857063	0.0953086	0.621425	0.738058	0.0585325	0.811616	0.99495	0.414872	0.0702253	0.112141
gene-LOC115706809	XP_030490409.2	1	protein HEAT STRESS TOLERANT DWD 1	AT2G19540.1	71.33	Transducin family protein / WD-40 repeat family protein		44.7601	41.0928	48.127	39.2715	32.0573	-0.130228	0.396156	0.794346	-0.213358	0.124695	0.22239	0.0945082	0.63893	0.976217	-0.495962	0.00619636	0.0126535
gene-LOC115707077	XP_030490772.2	1	uncharacterized LOC115707077	AT5G56850.8	33.13	hypothetical protein		6.83896	7.62988	5.63087	3.49807	2.25896	0.185437	0.452166	0.826207	-0.9767	0.000374609	0.00153053	-0.252519	0.383794	0.89967	-1.56337	1.92937e-06	6.84779e-06
gene-LOC115707078	XP_030490776.1	1	uncharacterized LOC115707078	AT1G55160.2	46.84	WAS/WASL-interacting family protein		5.23947	4.79835	6.36694	4.33404	8.41176	-0.147429	0.725846	0.937717	-0.329351	0.459076	0.597888	0.244589	0.578272	0.967075	0.652087	0.126396	0.187541
gene-LOC115704681	XP_030487739.2	1	GATA transcription factor 21	AT4G26150.1	38.27	cytokinin-responsive gata factor 1	PK07593.1	31.9972	40.3953	36.0156	19.1832	4.00802	0.328586	0.0493312	0.287574	-0.760489	1.5028e-06	1.01057e-05	0.159705	0.564727	0.966286	-3.01228	6.64204e-37	1.44356e-35
gene-LOC133039553	XP_060974415.1	1	uncharacterized LOC133039553					0	0	0	0	0.0231317	0	1	1	0	1	1	0	1	1	0	1	1
gene-LOC133039588	XP_060974477.1	1	uncharacterized LOC133039588					0	0	0	0	0	0	1	1	0	1	1	0	1	1	0	1	1
gene-LOC115706125	XP_030489520.1	1	beta-galactosidase	AT3G52840.2	72.8	beta-galactosidase 2		5.63815	8.8434	6.23975	7.64692	8.12216	0.638616	0.00697076	0.0755751	0.414802	0.0631477	0.128757	0.131051	0.645017	0.976293	0.504856	0.120709	0.180281
gene-LOC115706126	XP_030489521.2	1	uncharacterized LOC115706126	AT3G60310.2	39.94	acyl-CoA synthetase family protein		0.826408	0.641973	0.929449	0.893332	5.33926	-0.381601	0.30667	0.726749	0.0839489	0.807652	0.876949	0.151862	0.686878	0.980067	2.66782	7.47295e-20	7.91005e-19
gene-LOC115705876	XP_060960872.1	1	beta-galactosidase 1	AT3G13750.1	61.71	beta galactosidase 1		2.9327	5.65885	5.43785	11.0636	5.05961	0.939804	0.00126751	0.0212892	1.87674	8.74584e-14	1.57754e-12	0.858902	0.0148046	0.18773	0.766384	0.0249757	0.0447469
gene-LOC115706632	XP_030490203.2	1	probable polyamine oxidase 5	AT4G29720.1	56.7	polyamine oxidase 5		15.3968	15.7229	17.9547	15.7919	7.58127	0.0230656	0.897206	0.979697	0.012257	0.946499	0.967404	0.210128	0.358661	0.882529	-1.039	3.85089e-06	1.31879e-05
gene-LOC133039663	XP_060974561.1	1	uncharacterized LOC133039663					0	0	0	0	0	0	1	1	0	1	1	0	1	1	0	1	1
gene-LOC115719074	XP_030503837.2	1	uncharacterized LOC115719074					0	0.179236	0.03007	0.0631724	0.771692	0	1	1	0	1	1	0	1	1	0	1	1
gene-LOC133039726	XP_060974644.1	1	uncharacterized LOC133039726	AT5G42905.1	34.13	Polynucleotidyl transferase%2C ribonuclease H-like superfamily protein;start_range=.,17201414		0	0	0	0	0	0	1	1	0	1	1	0	1	1	0	1	1
gene-LOC115704923	XP_030488005.2	1	uncharacterized LOC115704923	AT5G56880.1	47.19	hypothetical protein		0.269969	0.615287	0.35433	1.58483	7.17535	0	1	1	2.58436	0.000897515	0.00332732	0	1	1	4.76449	4.95597e-16	4.18286e-15
gene-LOC115705830	XP_060960895.1	1	WD-40 repeat-containing protein MSI4	AT2G19520.1	81.44	Transducin family protein / WD-40 repeat family protein		113.949	118.115	125.877	119.916	77.9206	0.044001	0.745163	0.942115	0.0487759	0.681286	0.784704	0.132718	0.489941	0.943648	-0.563389	0.000655329	0.0016041
gene-LOC133039825	XP_060974782.1	1	uncharacterized LOC133039825	AT5G53670.1	43.7	transmembrane protein;start_range=.,21796997		0	0	0	0.0174339	0	0	1	1	0	1	1	0	1	1	0	1	1
gene-LOC115705024	XP_030488118.1	1	uncharacterized LOC115705024	AT4G29735.1	76.32	transmembrane protein		135.38	123.112	137.133	127.457	94.0454	-0.144022	0.38885	0.790091	-0.128343	0.405537	0.545796	0.00259498	0.990987	0.999496	-0.539914	0.00605398	0.0123952
gene-LOC115704436	XP_060960898.1	1	receptor-like serine/threonine-protein kinase ALE2	AT5G56890.1	52.87	Protein kinase superfamily protein		14.0146	15.1118	14.4849	11.9665	9.70654	0.0988029	0.630065	0.907509	-0.203943	0.309535	0.448481	0.0393017	0.89067	0.996876	-0.567005	0.0277998	0.0493047
gene-LOC115706308	XP_030489769.2	1	zinc finger CCCH domain-containing protein 64-like	AT5G56900.2	66.33	CwfJ-like family protein / zinc finger (CCCH-type) family protein		16.0831	14.7372	16.7471	16.9093	13.2351	-0.153889	0.39257	0.791958	0.0300445	0.855766	0.910966	0.0389199	0.864205	0.996876	-0.288015	0.186254	0.260225
gene-LOC133039843	XP_060974831.1	1	uncharacterized LOC133039843	AT2G25970.1	50.68	KH domain-containing protein		0	0	0	0	0.62765	0	1	1	0	1	1	0	1	1	0	1	1
gene-LOC115703585	XP_030486672.2	1	pathogen-associated molecular patterns-induced protein A70	AT5G56980.1	35.87	cotton fiber protein		67.0033	69.0714	95.8878	86.0844	38.6485	0.0349534	0.826749	0.963465	0.334689	0.0162759	0.0414511	0.504611	0.0161275	0.198362	-0.81048	1.33915e-05	4.27462e-05
gene-LOC133039853	XP_060974869.1	1	uncharacterized LOC133039853	AT4G29090.1	43.36	Ribonuclease H-like superfamily protein;start_range=.,14333528		0	0	0	0	0.07031	0	1	1	0	1	1	0	1	1	0	1	1
gene-LOC133039910	XP_060975013.1	1	uncharacterized LOC133039910	AT4G29090.1	24.62	Ribonuclease H-like superfamily protein;start_range=.,14333528		0	0	0	0	0	0	1	1	0	1	1	0	1	1	0	1	1
gene-LOC115708220	XP_030492297.1	1	bidirectional sugar transporter SWEET14-like	AT5G50800.1	58.72	Nodulin MtN3 family protein		0.0432341	0.0200641	0.0422358	0.755561	0.274337	0	1	1	4.18915	0.00186135	0.00631127	0	1	1	0	1	1
gene-LOC115704385	XP_060975107.1	1	uncharacterized LOC115704385	AT4G32340.1	65.31	Tetratricopeptide repeat (TPR)-like superfamily protein		0	0	0	0	0.0406437	0	1	1	0	1	1	0	1	1	0	1	1
gene-LOC133039952	XP_060975097.1	1	uncharacterized mitochondrial protein AtMg00310-like	AT4G29090.1	26.37	Ribonuclease H-like superfamily protein;start_range=.,14333528		0	0	0	0	0	0	1	1	0	1	1	0	1	1	0	1	1
gene-LOC115705068	XP_030488167.2	1	cytokinin dehydrogenase 2	AT4G29740.2	50.51	cytokinin oxidase 4		0	0.0180479	0.0762026	0.307676	2.37106	0	1	1	0	1	1	0	1	1	8.48326	4.24537e-08	1.83557e-07
gene-LOC133029100	XP_060957559.1	1	uncharacterized LOC133029100	AT3G31430.1	23.33	zinc knuckle (CCHC-type) family protein;start_range=.,12795861		0	0	0	0	0	0	1	1	0	1	1	0	1	1	0	1	1
gene-LOC115704143	XP_030487220.2	1	cytokinin dehydrogenase 3	AT5G56970.1	56.05	cytokinin oxidase 3		0.761132	1.40525	1.48762	30.1764	12.735	0.894917	0.104716	0.441241	5.30113	1.48871e-25	6.4894e-24	0.971689	0.0967165	0.558002	4.06649	8.93268e-30	1.48344e-28
gene-LOC115705826	XP_030489129.2	1	CRM-domain containing factor CFM3, chloroplastic/mitochondrial	AT4G29750.1	50.62	CRS1 / YhbY (CRM) domain-containing protein;start_range=.,14569728		13.529	16.2351	13.8819	17.2827	9.4213	0.254654	0.140252	0.516197	0.330399	0.0320186	0.0736547	0.0267696	0.903932	0.997278	-0.53701	0.00883257	0.0175226
gene-LOC115705640	XP_030488901.2	1	uncharacterized LOC115705640	AT3G47590.1	65.6	alpha/beta-Hydrolases superfamily protein;start_range=.,17536525		12.101	14.1535	14.4652	17.444	15.6572	0.22219	0.396604	0.794817	0.501656	0.0330194	0.0756746	0.248618	0.410252	0.914616	0.358991	0.218638	0.297969
gene-LOC115705639	XP_060960957.1	1	putative uncharacterized protein YDL057W	AT3G47590.1	62.31	alpha/beta-Hydrolases superfamily protein;start_range=.,17536525		99.6799	132.93	93.1156	49.609	22.1786	0.410545	0.0203372	0.15868	-1.03067	9.61687e-10	1.06007e-08	-0.106404	0.664914	0.978814	-2.17743	4.24055e-22	5.14714e-21
gene-LOC133029138	XP_060957608.1	1	RNA polymerase II degradation factor 1-like					0	0	0	0	0	0	1	1	0	1	1	0	1	1	0	1	1
gene-LOC133029158	XP_060957648.1	1	uncharacterized LOC133029158					0	0	0	0	0	0	1	1	0	1	1	0	1	1	0	1	1
gene-LOC115705086	XP_030488183.2	1	putative transcription factor bHLH041	AT5G56960.2	37.69	basic helix-loop-helix (bHLH) DNA-binding family protein	PK15505.1	0	0	0	0	0.462978	0	1	1	0	1	1	0	1	1	0	1	1
gene-LOC115707080	XP_030490777.2	1	DNA repair protein recA homolog 3, mitochondrial	AT2G19490.1	75.42	recA DNA recombination family protein		9.52546	8.3811	9.5571	8.90122	16.3343	-0.195357	0.359247	0.768546	-0.124353	0.543618	0.672732	-0.00595782	0.98244	0.999496	0.760126	0.00062034	0.00152741
gene-LOC115705230	XP_030488359.2	1	nucleosome assembly protein 1;2	AT5G56950.1	74.34	nucleosome assembly protein 1%3B3		243.788	218.663	234.101	235.743	304.952	-0.1645	0.212208	0.624713	-0.0745007	0.514049	0.646993	-0.0692466	0.723673	0.985213	0.308635	0.0495029	0.0823338
gene-LOC115705191	XP_030488304.2	1	uncharacterized LOC115705191	AT5G56930.1	38.68	CCCH-type zinc finger family protein		8.94587	7.72572	7.78711	10.6521	8.9473	-0.208869	0.239963	0.656979	0.219712	0.185418	0.303096	-0.201686	0.374811	0.893225	0.013276	0.947844	0.96248
gene-LOC115707594	XP_030491468.2	1	heat shock factor protein HSF30	AT2G26150.4	42.91	heat shock transcription factor A2		2.32768	2.31482	2.45184	4.16531	3.43058	-0.0164276	0.951793	0.989634	0.815472	0.000540448	0.00212221	0.0669692	0.838059	0.995797	0.544267	0.0624083	0.101042
gene-LOC133029262	XP_060957722.1	1	uncharacterized LOC133029262					0	0	0	0	0	0	1	1	0	1	1	0	1	1	0	1	1
gene-LOC133029296	XP_060957774.1	1	uncharacterized LOC133029296	AT3G09510.1	26.76	Ribonuclease H-like superfamily protein;start_range=.,2921804		0	0	0	0	0	0	1	1	0	1	1	0	1	1	0	1	1
gene-LOC115703652	XP_030486752.2	1	uncharacterized LOC115703652	AT5G57000.1	45.67	DEAD-box ATP-dependent RNA helicase		5.14852	5.90166	6.23491	8.11584	4.72612	0.187481	0.644186	0.913678	0.622777	0.108831	0.199622	0.251854	0.566441	0.96639	-0.138219	0.773458	0.827874
gene-LOC133029323	XP_060957830.1	1	uncharacterized LOC133029323	AT1G48720.1	28.26	Copia-like polyprotein/retrotransposon		0	0	0	0	0	0	1	1	0	1	1	0	1	1	0	1	1
gene-LOC115704829	XP_030487895.2	1	IQ domain-containing protein IQM1	AT4G33050.3	62.37	calmodulin-binding family protein		0.0140099	0.0141334	0.137652	0.0344267	0.763808	0	1	1	0	1	1	0	1	1	0	1	1
gene-LOC115707669	XP_030491555.1	1	EPIDERMAL PATTERNING FACTOR-like protein 6	AT3G13898.1	33.63	EPIDERMAL PATTERNING FACTOR-like protein		1.18356	1.52392	1.30935	2.8254	0.583556	0.34625	0.610095	0.901635	1.23346	0.0352969	0.0798655	0.141551	0.848226	0.996523	0	1	1
gene-LOC115705415	XP_030488610.2	1	casein kinase 1-like protein 1	AT4G26100.1	75.53	casein kinase 1		89.7215	93.8117	94.8207	88.7983	160.488	0.0530944	0.697085	0.928047	-0.0465094	0.701601	0.800665	0.0669134	0.725141	0.985213	0.816259	2.71917e-07	1.06582e-06
gene-LOC115704841	XP_030487913.1	1	uncharacterized LOC115704841	AT2G19460.1	47.66	DUF3511 domain protein (DUF3511)		28.7211	27.4268	28.3513	21.054	17.7904	-0.0727444	0.707413	0.930899	-0.477642	0.0189678	0.0473016	-0.0300963	0.900091	0.997212	-0.707537	0.00279674	0.0061094
gene-LOC115704840	XP_030487910.1	1	diacylglycerol O-acyltransferase 1B	AT2G19450.1	64.95	membrane bound O-acyl transferase (MBOAT) family protein		19.1178	16.5115	15.2171	19.5996	15.0712	-0.219866	0.214278	0.627287	0.0111632	0.944801	0.966724	-0.341126	0.12597	0.629943	-0.356954	0.0972153	0.149086
gene-LOC133029592	XP_060957885.1	1	uncharacterized LOC133029592	AT4G29090.1	28.55	Ribonuclease H-like superfamily protein;start_range=.,14333528		0	0	0	0	0	0	1	1	0	1	1	0	1	1	0	1	1
gene-LOC115705447	XP_030488643.1	1	eukaryotic initiation factor 4A-10	AT1G54270.1	91.26	eif4a-2		187.451	202.62	241.454	192.762	180.286	0.0984558	0.471981	0.83814	0.00687349	0.953362	0.971599	0.348758	0.0719942	0.482519	-0.0757795	0.639408	0.716208
gene-LOC115705449	XP_030488647.2	1	THO complex subunit 6-like	AT2G19430.1	62.87	DWD (DDB1-binding WD40 protein) hypersensitive to ABA 1		14.5046	13.3552	15.0887	12.4474	13.0099	-0.12823	0.516142	0.860818	-0.247336	0.214407	0.339207	0.0332029	0.891314	0.996876	-0.182979	0.421925	0.51516
gene-LOC115704035	XP_060961077.1	1	THO complex subunit 6-like	AT2G19430.1	55.86	DWD (DDB1-binding WD40 protein) hypersensitive to ABA 1		0.0413958	0.0746755	0.157911	0.304103	0.0824466	0	1	1	0	1	1	0	1	1	0	1	1
gene-LOC115707577	XP_030491451.1	1	glycylpeptide N-tetradecanoyltransferase 1	AT5G57020.1	84.33	myristoyl-CoA:protein N-myristoyltransferase		50.8008	46.2257	47.3055	44.5521	39.2687	-0.143032	0.337404	0.753823	-0.213849	0.111191	0.202874	-0.112979	0.572033	0.96639	-0.385624	0.0286976	0.0507167
gene-LOC115707578	XP_060961091.1	1	single myb histone 3-like	AT1G72740.2	46.91	Homeodomain-like/winged-helix DNA-binding family protein		17.5768	13.716	16.603	19.5113	36.0054	-0.362429	0.094103	0.41638	0.125554	0.528427	0.660037	-0.0887824	0.734176	0.986341	1.02224	3.99241e-06	1.36518e-05
gene-LOC115702236	XP_030485548.2	1	lycopene epsilon cyclase, chloroplastic	AT5G57030.1	73.48	Lycopene beta/epsilon cyclase protein		43.8953	43.0096	36.2092	16.9566	17.0788	-0.0377102	0.829622	0.964045	-1.39568	1.8882e-20	5.83078e-19	-0.287793	0.195683	0.751103	-1.37664	2.23762e-12	1.4507e-11
gene-LOC133029958	XP_060957996.1	1	uncharacterized LOC133029958	AT2G34320.1	23.36	Polynucleotidyl transferase%2C ribonuclease H-like superfamily protein;start_range=.,14484959		0	0	0	0	0	0	1	1	0	1	1	0	1	1	0	1	1
gene-LOC133029965	XP_060958032.1	1	uncharacterized LOC133029965	AT2G06105.1	38.89			0	0	0	0	0	0	1	1	0	1	1	0	1	1	0	1	1
gene-LOC115702248	XP_060958121.1	1	uncharacterized LOC115702248	AT1G19260.1	37.57	TTF-type zinc finger protein with HAT dimerization domain-containing protein;start_range=.,6657260		0	0	0	0	0	0	1	1	0	1	1	0	1	1	0	1	1
gene-LOC133030003	XP_060958154.1	1	uncharacterized LOC133030003	AT4G29090.1	29.37	Ribonuclease H-like superfamily protein;start_range=.,14333528		0	0	0	0	0	0	1	1	0	1	1	0	1	1	0	1	1
gene-LOC115702237	XP_030485549.2	1	UDP-glycosyltransferase 91C1-like	AT5G49690.1	47.83	UDP-Glycosyltransferase superfamily protein		10.4169	11.5882	6.39937	23.3588	7.66433	0.14963	0.488415	0.847364	1.14205	2.97033e-10	3.54591e-09	-0.712005	0.0138704	0.179545	-0.454598	0.0858275	0.133794
gene-LOC115702234	XP_030485547.2	1	UDP-glycosyltransferase 91C1-like	AT5G49690.1	50.11	UDP-Glycosyltransferase superfamily protein		7.1101	7.0998	3.52548	15.0221	5.91465	-0.0135008	0.963679	0.991565	1.05238	5.38871e-05	0.000269644	-1.03302	0.00592766	0.0988277	-0.278858	0.414022	0.50727
gene-LOC133031584	XP_060961103.1	1	uncharacterized LOC133031584					0.0546895	0	0	0.0399443	0.0544605	0	1	1	0	1	1	0	1	1	0	1	1
gene-LOC133030019	XP_060958209.1	1	uncharacterized LOC133030019	AT1G21280.1	32.71	Copia-like polyprotein/retrotransposon		0	0	0	0	0	0	1	1	0	1	1	0	1	1	0	1	1
gene-LOC133031595	XP_060961104.1	1	uncharacterized LOC133031595					0	0	0	0	0.0445057	0	1	1	0	1	1	0	1	1	0	1	1
gene-LOC115702258	XP_060961105.1	1	UDP-glycosyltransferase 91C1	AT5G49690.1	48.27	UDP-Glycosyltransferase superfamily protein		1.26475	0.466251	0.464141	0.899525	0.34094	-1.43913	0.0264046	0.190826	-0.508466	0.385981	0.526828	-1.4428	0.0412696	0.361075	-1.89731	0.0122115	0.0234636
gene-LOC115702257	XP_030485568.2	1	UDP-glycosyltransferase 91C1	AT5G49690.1	49.89	UDP-Glycosyltransferase superfamily protein		41.5292	29.2291	19.0235	43.0357	21.4064	-0.517511	0.0161808	0.13667	0.0229725	0.907831	0.944763	-1.14255	2.79395e-05	0.00123441	-0.972609	5.88418e-05	0.000170211
gene-LOC133031617	XP_060961106.1	1	UDP-glycosyltransferase 91C1-like	AT5G49690.1	48.6	UDP-Glycosyltransferase superfamily protein		0.0898815	0.043533	0.0737986	0	0	0	1	1	0	1	1	0	1	1	0	1	1
gene-LOC115706965	XP_030490609.2	1	U-box domain-containing protein 34	AT5G57035.1	55.17	U-box domain-containing protein kinase family protein		3.13366	3.19088	3.56614	6.83903	3.67285	0.0195158	0.944301	0.987141	1.104	2.64878e-06	1.7112e-05	0.179034	0.588771	0.968773	0.214974	0.491548	0.582575
gene-LOC115708275	XP_030492362.2	1	glyoxylase I 4	AT5G57040.1	67.98	Lactoylglutathione lyase / glyoxalase I family protein		38.1146	28.732	23.7271	19.8068	15.7501	-0.407676	0.0905309	0.406915	-0.965706	5.85793e-05	0.000289907	-0.685705	0.0160593	0.19825	-1.28355	5.5388e-06	1.85925e-05
gene-LOC115705195	XP_030488311.2	1	protein ALP1-like	AT4G29780.1	58.79	nuclease		7.16335	1.60241	2.9819	5.87678	6.16209	-2.17133	4.01003e-09	3.28294e-07	-0.315274	0.317557	0.457072	-1.28409	0.000782751	0.0205659	-0.235305	0.49908	0.589828
gene-LOC133031631	XP_060961108.1	1	uncharacterized LOC133031631	AT4G33080.1	76.48	AGC (cAMP-dependent%2C cGMP-dependent and protein kinase C) kinase family protein		5.66108	9.61771	9.84466	10.5345	35.9233	0.75476	0.00141724	0.0230703	0.866837	0.000117241	0.00054055	0.784053	0.00415809	0.0755521	2.6483	5.89726e-35	1.19489e-33
gene-LOC133031642	XP_060961109.1	1	uncharacterized LOC133031642	AT4G29790.1	52.58	serine/arginine repetitive matrix protein		8.70279	6.71744	6.32734	9.50244	9.17419	-0.381247	0.0317856	0.21493	0.104516	0.507877	0.64109	-0.470265	0.0470624	0.389035	0.0597145	0.778394	0.831225
gene-LOC133031647	XP_060961118.1	1	protein phosphatase 2C 77	AT5G57050.1	60.61	Protein phosphatase 2C family protein		1.56822	1.82934	1.40178	4.04275	2.93178	0.218767	0.573588	0.889962	1.34151	3.82431e-05	0.000197828	-0.171991	0.707194	0.981148	0.884319	0.0247383	0.0443747
gene-LOC133031652	XP_060961121.1	1	mitogen-activated protein kinase kinase SIPKK-like	AT4G29810.1	68.64	MAP kinase kinase 2		59.2049	41.2594	49.6285	38.4025	26.2126	-0.549969	0.000857178	0.0155189	-0.663675	1.07445e-05	6.21553e-05	-0.290924	0.18196	0.730363	-1.21715	2.64178e-09	1.29515e-08
gene-LOC133030130	XP_060958351.1	1	uncharacterized LOC133030130	AT4G29090.1	23.44	Ribonuclease H-like superfamily protein;start_range=.,14333528		0	0	0	0	0	0	1	1	0	1	1	0	1	1	0	1	1
gene-LOC133030193	XP_060958507.1	1	L-ascorbate peroxidase 2, cytosolic-like	AT3G09640.2	53.09	ascorbate peroxidase 2		0	0	0	0	0	0	1	1	0	1	1	0	1	1	0	1	1
gene-LOC133031656	XP_060961142.1	1	uncharacterized LOC133031656	AT3G05850.1	31.71	MuDR family transposase		0	0	2.915e-07	0	0.0135496	0	1	1	0	1	1	0	1	1	0	1	1
gene-LOC133031660	XP_060961151.1	1	uncharacterized LOC133031660	AT5G45570.2	25	Ulp1 protease family protein;start_range=.,18472301		0	0	0.0224831	0	0	0	1	1	0	1	1	0	1	1	0	1	1
gene-LOC133031665	XP_060961159.1	1	uncharacterized LOC133031665					0	0	0	0.0325225	0.0421017	0	1	1	0	1	1	0	1	1	0	1	1
gene-LOC133030195	XP_060958545.1	1	uncharacterized LOC133030195					0	0	0	0	0	0	1	1	0	1	1	0	1	1	0	1	1
gene-LOC115706904	XP_060958587.1	1	L-ascorbate peroxidase 2, cytosolic-like	AT1G07890.8	57.14	ascorbate peroxidase 1		0	0	0	0	0	0	1	1	0	1	1	0	1	1	0	1	1
gene-LOC133031667	XP_060961164.1	1	cellulose synthase-like protein E6	AT1G55850.1	47.01	cellulose synthase like E1		1.49415	1.06765	0.650162	0.772218	0.897707	0	1	1	0	1	1	0	1	1	0	1	1
gene-LOC115717751	XP_060961167.1	1	L10-interacting MYB domain-containing protein-like	AT5G05800.5	24.52	Myb/SANT-like DNA-binding domain protein		0	0.0158784	0	0	0	0	1	1	0	1	1	0	1	1	0	1	1
gene-LOC115703891	XP_030486988.2	1	uncharacterized LOC115703891	AT5G41980.1	35.91	nuclease		0	0	0	0	0	0	1	1	0	1	1	0	1	1	0	1	1
gene-LOC115703892	XP_030486989.2	1	L10-interacting MYB domain-containing protein-like	AT5G05800.5	27.83	Myb/SANT-like DNA-binding domain protein		0	0	0	0	0	0	1	1	0	1	1	0	1	1	0	1	1
gene-LOC115706223	XP_030489661.2	1	cell division control protein 48 homolog C-like	AT3G01610.1	60.17	cell division cycle 48C		17.1216	17.8714	14.9328	17.4799	17.8731	0.0544946	0.755728	0.944988	0.00706272	0.96605	0.979105	-0.206751	0.361753	0.883628	0.0483803	0.812448	0.8584
gene-LOC133030220	XP_060958666.1	1	uncharacterized mitochondrial protein AtMg00810-like	AT4G23160.3	32.35	cysteine-rich RECEPTOR-like kinase;start_range=.,12131325		0	0	0	0	0	0	1	1	0	1	1	0	1	1	0	1	1
gene-LOC133031670	XP_060961169.1	1	pre-mRNA cleavage factor Im 25 kDa subunit 1	AT4G29820.1	73.23	homolog of CFIM-25		4.61231	4.81402	3.54383	6.35506	5.05744	0.0482657	0.902018	0.980751	0.428034	0.243224	0.373668	-0.396032	0.37787	0.895076	0.11885	0.786428	0.837911
gene-LOC115705491	XP_030488689.2	1	uncharacterized LOC115705491	AT4G26060.1	60.33	Ribosomal protein L18ae family		15.2797	16.5388	17.531	16.772	216.369	0.109737	0.645324	0.913779	0.106876	0.652747	0.762954	0.192213	0.514455	0.952129	3.81057	7.92801e-84	6.10831e-82
gene-LOC115705490	XP_030488688.1	1	UBP1-associated proteins 1C	AT2G19385.1	49.04	zinc ion binding protein		45.4047	44.2232	43.8306	64.5633	41.9244	-0.0451954	0.778641	0.950998	0.480333	0.00133992	0.00473289	-0.0624678	0.778614	0.992996	-0.129371	0.494045	0.584994
gene-LOC115704070	XP_030487152.2	1	protein EARLY FLOWERING 5	AT5G57070.1	39.21	hydroxyproline-rich glycoprotein family protein		9.50724	8.4848	8.47847	9.13856	9.86607	-0.176941	0.524358	0.86424	-0.0879482	0.748306	0.834125	-0.184587	0.621393	0.973654	0.0330807	0.912382	0.936644
gene-LOC133030310	XP_060958922.1	1	uncharacterized LOC133030310					0	0	0	0	0	0	1	1	0	1	1	0	1	1	0	1	1
gene-LOC133030328	XP_060958979.1	1	uncharacterized LOC133030328					0	0.051374	0	0	0.0146478	0	1	1	0	1	1	0	1	1	0	1	1
gene-LOC133030341	XP_060959002.1	1	formin-like protein 14	AT5G57070.1	47.3	hydroxyproline-rich glycoprotein family protein		0.199716	0	0	0	1.19379	0	1	1	0	1	1	0	1	1	0	1	1
gene-LOC115706878	XP_030490498.2	1	uncharacterized LOC115706878	AT5G57070.1	38.84	hydroxyproline-rich glycoprotein family protein		4.61549	3.70718	3.78461	4.55389	7.16207	-0.327335	0.242512	0.659353	-0.0482055	0.860566	0.914216	-0.300405	0.341492	0.874678	0.615549	0.0342452	0.0593579
gene-LOC115705051	XP_030488151.2	1	WD repeat-containing protein VIP3	AT4G29830.1	78.82	Transducin/WD40 repeat-like superfamily protein		25.0981	24.7137	27.1015	18.8681	18.4062	-0.030214	0.848473	0.969248	-0.434166	0.003089	0.00981634	0.0993125	0.641563	0.976217	-0.46311	0.0164111	0.0306696
gene-LOC115706054	XP_030489428.2	1	threonine synthase 1, chloroplastic	AT4G29840.1	84.04	Pyridoxal-5'-phosphate-dependent enzyme family protein		52.7527	51.4843	51.4109	28.6462	25.3993	-0.0432338	0.787131	0.953609	-0.906084	1.28164e-10	1.60085e-09	-0.0495791	0.850288	0.996523	-1.06951	1.08687e-08	4.99781e-08
gene-LOC115706956	XP_030490599.2	1	myosin-17	AT5G20490.2	82.95	myosin family protein with Dil;start_range=.,6927064		22.1379	22.7964	21.2244	26.6633	16.184	0.0333994	0.827496	0.963499	0.246271	0.0700238	0.140096	-0.0722771	0.741527	0.988039	-0.467573	0.0103831	0.0202562
gene-LOC115705879	XP_030489186.2	1	glycerophosphocholine acyltransferase 1	AT5G35460.2	82.06	membrane protein		24.7527	23.6779	23.8007	22.3301	41.3092	-0.0712134	0.676022	0.923868	-0.173056	0.290394	0.427201	-0.0677967	0.757514	0.990708	0.725602	0.000622455	0.00153136
gene-LOC133030458	XP_060959197.1	1	uncharacterized LOC133030458	AT3G05850.1	30.19	MuDR family transposase		0	0	0	0	0.340349	0	1	1	0	1	1	0	1	1	0	1	1
gene-LOC133031699	XP_060961234.1	1	uncharacterized LOC133031699					0	0	0.0498762	0	0.0537435	0	1	1	0	1	1	0	1	1	0	1	1
gene-LOC115705187	XP_030488298.2	1	protein PLASTID MOVEMENT IMPAIRED 1-RELATED 1	AT5G20610.1	50.08	EEIG1/EHBP1 protein amino-terminal domain protein		9.46443	8.4948	8.54527	7.55061	13.1841	-0.163224	0.368583	0.776062	-0.348795	0.0488347	0.104663	-0.158453	0.488317	0.943333	0.461813	0.0242193	0.043509
gene-LOC115706504	XP_030490023.1	1	alpha/beta hydrolase domain-containing protein WAV2	AT5G20520.1	79.61	alpha/beta-Hydrolases superfamily protein		26.7306	32.8828	27.1653	23.9344	37.0189	0.284389	0.122089	0.478809	-0.190871	0.292459	0.429434	0.0104139	0.964546	0.999246	0.449226	0.0299454	0.0527194
gene-LOC133030488	XP_060959252.1	1	uncharacterized LOC133030488	AT4G29090.1	22.93	Ribonuclease H-like superfamily protein;start_range=.,14333528		0	0	0	0	0	0	1	1	0	1	1	0	1	1	0	1	1
gene-LOC133031694	XP_060961219.1	1	nuclear transcription factor Y subunit A-7-like	AT1G72830.1	47.21	nuclear factor Y%2C subunit A3		0	0	0	0	0	0	1	1	0	1	1	0	1	1	0	1	1
gene-LOC115704017	XP_060959284.1	1	uncharacterized LOC115704017	AT4G29090.1	22.93	Ribonuclease H-like superfamily protein;start_range=.,14333528		0	0	0	0	0	0	1	1	0	1	1	0	1	1	0	1	1
gene-LOC115706177	XP_030489588.2	1	nuclear transcription factor Y subunit A-7	AT1G72830.1	47.21	nuclear factor Y%2C subunit A3	PK20005.1	2.38645	3.43968	4.27553	1.81712	0.435439	0.54718	0.85074	0.969248	-0.403847	0.889686	0.933092	0.858119	0.768725	0.991668	-2.45125	0.592276	0.674825
gene-LOC115705212	XP_030488334.2	1	phospholipid:diacylglycerol acyltransferase 1	AT5G13640.1	75.54	phospholipid:diacylglycerol acyltransferase		17.8918	15.4649	13.4879	13.7608	12.8025	-0.201416	0.248549	0.666953	-0.367714	0.0224479	0.0545537	-0.375669	0.106558	0.585919	-0.472577	0.019626	0.0360068
gene-LOC115704167	XP_030487241.2	1	uncharacterized LOC115704167					0	0	0	0	0.39939	0	1	1	0	1	1	0	1	1	0	1	1
gene-LOC115707298	XP_030491070.1	1	protein Brevis radix-like 4	AT5G20540.1	68.94	BREVIS RADIX-like 4		7.41497	8.667	8.80471	7.76546	3.91448	0.203384	0.376355	0.78093	0.0502594	0.82749	0.891143	0.248653	0.354026	0.879383	-0.962942	0.00126969	0.00294414
gene-LOC115707381	XP_030491192.1	1	small ribosomal subunit protein eS27y	AT3G61110.1	95.35	ribosomal protein S27		586.236	577.495	715.859	545.579	536.606	-0.0237628	0.871029	0.97443	-0.136852	0.288323	0.425096	0.278491	0.205701	0.765575	-0.135519	0.456774	0.549119
gene-LOC115708265	XP_030492348.2	1	protein BIG GRAIN 1-like A	AT3G42800.1	38.05	AF-like protein		1.21515	1.52085	2.03867	1.1863	0.717248	0.333246	0.512847	0.859936	-0.0435594	0.937544	0.961952	0.742446	0.146773	0.675485	-0.752188	0.26631	0.353192
gene-LOC115705862	XP_030489167.1	1	vacuolar protein sorting-associated protein 2 homolog 1	AT2G06530.1	88.89	SNF7 family protein		49.1912	41.8252	34.413	72.501	85.8241	-0.239509	0.161272	0.548683	0.532963	0.000761523	0.00287646	-0.52552	0.0177334	0.212359	0.791356	4.67751e-05	0.000137297
gene-LOC115703587	XP_030486673.2	1	RING-H2 finger protein ATL52-like	AT5G17600.1	39.57	RING/U-box superfamily protein		2.67718	3.60778	4.99509	1.46723	2.59042	0.418185	0.560377	0.883538	0	1	1	0.883975	0.217329	0.782152	0	1	1
gene-LOC115707601	XP_030491473.2	1	mechanosensitive ion channel protein 10	AT5G12080.3	51	mechanosensitive channel of small conductance-like 10		6.42381	4.54737	4.45169	3.97714	2.28411	-0.509329	0.0349235	0.228115	-0.714968	0.00376441	0.0116873	-0.541689	0.0571489	0.431172	-1.50532	5.40044e-07	2.0406e-06
gene-LOC115707602	XP_030491474.2	1	replication protein A 70 kDa DNA-binding subunit A	AT2G06510.1	70.83	replication protein A 1A		74.3673	69.5577	59.3158	30.9815	30.6914	-0.103727	0.494511	0.850528	-1.28521	3.78651e-22	1.34215e-20	-0.335704	0.111458	0.598301	-1.29095	9.80536e-14	6.99348e-13
gene-LOC115707603	XP_030491475.1	1	uncharacterized LOC115707603	AT2G06520.1	59.02	photosystem II subunit X		1112.3	1037.93	868.915	360.443	300.781	-0.0993191	0.519965	0.862291	-1.6638	5.7372e-32	3.80906e-30	-0.365052	0.0689577	0.471714	-1.89232	1.70386e-27	2.601e-26
gene-LOC115704250	XP_030487326.2	1	pentatricopeptide repeat-containing protein At5g44230	AT5G44230.1	56.81	Pentatricopeptide repeat (PPR) superfamily protein		0.783186	0.629466	0.655108	0.85058	0.984783	-0.326193	0.547757	0.876375	0.0967051	0.846321	0.904594	-0.251606	0.647888	0.977144	0.314662	0.607251	0.688152
gene-LOC115705562	XP_030488788.1	1	small ribosomal subunit protein uS3x	AT5G35530.1	88.79	Ribosomal protein S3 family protein		477.702	509.314	588.005	388.047	371.812	0.0857753	0.518719	0.862291	-0.329052	0.0045385	0.0137276	0.288221	0.136448	0.65359	-0.374691	0.0224542	0.0406636
gene-LOC115707722	XP_030491612.1	1	protein ELF4-LIKE 3	AT1G17455.2	70.69	ELF4-like 4		17.9126	17.0965	16.1588	42.4141	20.9791	-0.0778402	0.738723	0.941095	1.21064	1.6525e-09	1.75433e-08	-0.162008	0.573788	0.96639	0.214681	0.410919	0.503985
gene-LOC115701999	XP_030485326.2	1	stress-response A/B barrel domain-containing protein UP3-like	AT2G31670.1	40.65	Stress responsive alpha-beta barrel domain protein		27.6506	24.5915	25.6279	24.2737	7.3955	-0.180044	0.462901	0.833033	-0.230038	0.367906	0.508348	-0.121678	0.66581	0.978814	-1.92026	2.06488e-08	9.26949e-08
gene-LOC115706857	XP_030490476.2	1	stress-response A/B barrel domain-containing protein UP3	AT2G31670.1	50.93	Stress responsive alpha-beta barrel domain protein		63.3025	59.3983	62.5496	55.4645	60.0534	-0.0995996	0.50888	0.85816	-0.218392	0.127171	0.225916	-0.0290761	0.885708	0.996876	-0.0896547	0.622345	0.70208
gene-LOC133031719	XP_060961288.1	1	uncharacterized LOC133031719					0	0	0	0	0	0	1	1	0	1	1	0	1	1	0	1	1
gene-LOC133030664	XP_060959473.1	1	uncharacterized LOC133030664	AT2G19960.1	50.29	hAT family dimerization domain-containing protein		0	0	0	0	0	0	1	1	0	1	1	0	1	1	0	1	1
gene-LOC133029103	XP_060957560.1	1	uncharacterized LOC133029103	AT4G15880.1	31	Cysteine proteinases superfamily protein		0	0	0	0	0	0	1	1	0	1	1	0	1	1	0	1	1
gene-LOC133030729	XP_060959495.1	1	uncharacterized LOC133030729	AT1G43760.1	27.63			0	0	0	0	0.0186285	0	1	1	0	1	1	0	1	1	0	1	1
gene-LOC115701997	XP_030485324.2	1	myb-related protein Hv1-like	AT1G22640.1	68.1	myb domain protein 3	PK16315.1	0.651037	0.17103	0.381123	0.142454	0.055121	0	1	1	0	1	1	0	1	1	0	1	1
gene-LOC115701994	XP_030485320.2	1	14 kDa proline-rich protein DC2.15	AT2G45180.1	63.36	Bifunctional inhibitor/lipid-transfer protein/seed storage 2S albumin superfamily protein		0.167105	0.570591	0.0421647	0.3364	0.227924	0	1	1	0	1	1	0	1	1	0	1	1
gene-LOC133031722	XP_060961296.1	1	uncharacterized LOC133031722					0	0	0	0	0	0	1	1	0	1	1	0	1	1	0	1	1
gene-LOC115701991	XP_060961301.1	1	cytochrome P450 CYP72A616	AT3G14690.1	49.14	cytochrome P450%2C family 72%2C subfamily A%2C polypeptide 15		0.120723	0.0860547	0.134114	0.693151	0.192603	0	1	1	2.5245	0.017547	0.0442055	0	1	1	0	1	1
gene-LOC115706479	XP_030489999.2	1	methylthioribose-1-phosphate isomerase	AT2G05830.1	78.17	NagB/RpiA/CoA transferase-like superfamily protein		37.5118	56.5037	60.2374	60.4668	51.6792	0.582302	0.000125655	0.0032295	0.667967	1.28351e-06	8.70569e-06	0.673088	0.000829177	0.0215496	0.446845	0.0121867	0.0234235
gene-LOC115706478	XP_060961319.1	1	aldehyde dehydrogenase family 7 member A1	AT1G54100.2	82.48	aldehyde dehydrogenase 7B4		75.0088	132.312	141.57	178.633	80.9719	0.811107	1.08058e-08	8.06016e-07	1.2277	1.39121e-24	5.70429e-23	0.905613	2.95818e-06	0.000162303	0.0944501	0.584977	0.668181
gene-LOC115704893	XP_030487963.2	1	uncharacterized LOC115704893	AT5G20670.1	58.62	DUF1677 family protein (DUF1677)		11.3384	15.8332	14.8361	17.0694	8.43185	0.475003	0.0441482	0.267603	0.564985	0.012748	0.0336993	0.377902	0.175451	0.718655	-0.440133	0.142458	0.20764
gene-LOC115708234	XP_030492312.2	1	protein STRICTOSIDINE SYNTHASE-LIKE 4	AT3G51420.1	34.25	strictosidine synthase-like 4		36.5923	58.3704	64.474	49.6698	24.4642	0.669575	0.000701063	0.0133099	0.415318	0.0110606	0.0298605	0.809491	0.00158011	0.0361917	-0.592893	0.00621321	0.0126795
gene-LOC115704979	XP_030488057.2	1	ATP-dependent DNA helicase Q-like 3	AT4G35740.1	63.52	DEAD/DEAH box RNA helicase family protein		5.51081	5.70311	5.4154	5.76647	7.47791	0.0413477	0.868337	0.974086	0.0424423	0.86128	0.914761	-0.033621	0.917601	0.997331	0.426462	0.111653	0.168366
gene-LOC115704980	XP_030488058.2	1	cation/calcium exchanger 3	AT1G54115.1	58.91	cation calcium exchanger 4		15.7826	13.2934	14.0062	17.7606	13.4128	-0.257047	0.137817	0.512264	0.140809	0.369743	0.510397	-0.187994	0.39371	0.902634	-0.263287	0.193896	0.269225
gene-LOC115704015	XP_030487096.1	1	copper transporter 5	AT5G20650.1	47.55	copper transporter 5		6.77744	10.0612	8.4615	13.6626	48.8161	0.536438	0.397912	0.795343	0.937398	0.116999	0.211437	0.287086	0.679361	0.97978	2.82782	8.07265e-10	4.16198e-09
gene-LOC115706432	XP_030489943.2	1	protein LURP-one-related 6	AT2G05910.1	56.34	LURP-one-like protein (DUF567)		0	0.104084	0	0.345793	1.17144	0	1	1	0	1	1	0	1	1	0	1	1
gene-LOC115706155	XP_030489551.2	1	guanine nucleotide-binding protein subunit gamma 3	AT5G20635.1	55.31	guanine nucleotide-binding protein subunit gamma		7.23287	7.59099	9.71295	7.51072	2.90705	0.0561851	0.819542	0.96123	-0.0427061	0.854293	0.909847	0.456509	0.182118	0.730447	-1.3097	1.51871e-05	4.8059e-05
gene-LOC115706153	XP_030489550.2	1	subtilisin-like protease SBT1.8	AT2G05920.1	71.09	Subtilase family protein		152.38	165.009	157.495	132.489	49.2242	0.104853	0.536215	0.870495	-0.226512	0.130045	0.230098	0.0337557	0.896353	0.997212	-1.64706	7.76925e-17	6.91884e-16
gene-LOC133030848	XP_060959774.1	1	uncharacterized LOC133030848					0	0	0	0	0	0	1	1	0	1	1	0	1	1	0	1	1
gene-LOC133030869	XP_060959810.1	1	uncharacterized LOC133030869					0	0	0	0	0	0	1	1	0	1	1	0	1	1	0	1	1
gene-LOC133030880	XP_060959842.1	1	protein FAR1-RELATED SEQUENCE 5-like	AT4G38180.1	30.67	FAR1-related sequence 5		0	0	0	0	0	0	1	1	0	1	1	0	1	1	0	1	1
gene-LOC115707585	XP_030491458.1	1	RING-box protein 1a	AT5G20570.1	88.98	RING-box 1		184.451	206.625	234.181	158.044	251.108	0.158512	0.285133	0.705291	-0.257677	0.0554775	0.116009	0.331519	0.110848	0.596866	0.432809	0.0108631	0.0210986
gene-LOC115707066	XP_030490755.2	1	trimethyltridecatetraene synthase	AT5G07990.1	40.5	Cytochrome P450 superfamily protein		0.998681	0.236347	0.315084	0	0.511816	-2.06108	0.00806996	0.0840187	-7.21893	1.03002e-05	5.98055e-05	-1.68091	0.041471	0.361504	-0.960194	0.211926	0.290509
gene-LOC133030918	XP_060959975.1	1	uncharacterized LOC133030918	AT2G34320.1	26.26	Polynucleotidyl transferase%2C ribonuclease H-like superfamily protein;start_range=.,14484959		0	0	0	0	0	0	1	1	0	1	1	0	1	1	0	1	1
gene-LOC133030933	XP_060960022.1	1	uncharacterized LOC133030933	AT4G29090.1	26.89	Ribonuclease H-like superfamily protein;start_range=.,14333528		0	0	0	0	0.0521005	0	1	1	0	1	1	0	1	1	0	1	1
gene-LOC133030955	XP_060960063.1	1	uncharacterized LOC133030955					0	0	0	0	0	0	1	1	0	1	1	0	1	1	0	1	1
gene-LOC133029104	XP_060957562.1	1	uncharacterized LOC133029104					0	0	0	0	0	0	1	1	0	1	1	0	1	1	0	1	1
gene-LOC115706810	XP_030490410.1	1	serine/threonine-protein kinase RIPK	AT2G05940.1	69.23	Protein kinase superfamily protein		0.284542	0.834353	0.416886	3.02967	4.66555	1.51206	0.0570659	0.311151	3.33899	6.07274e-09	5.96289e-08	0	1	1	3.9786	8.04475e-13	5.38276e-12
gene-LOC133030969	XP_060960098.1	1	uncharacterized LOC133030969	AT5G45570.2	25.43	Ulp1 protease family protein;start_range=.,18472301		0	0	0	0	0	0	1	1	0	1	1	0	1	1	0	1	1
gene-LOC133030981	XP_060960136.1	1	uncharacterized LOC133030981	AT1G31150.2	28.7	K-box region protein (DUF1985)		0	0	0	0	0	0	1	1	0	1	1	0	1	1	0	1	1
gene-LOC115706674	XP_030490249.2	1	pro-cathepsin H	AT3G45310.1	75.07	Cysteine proteinases superfamily protein		182.779	152.864	139.57	176.503	163.986	-0.26569	0.0463868	0.275774	-0.0766568	0.50791	0.64109	-0.400749	0.041445	0.361465	-0.172527	0.325006	0.416513
gene-LOC115706673	XP_030490247.2	1	pentatricopeptide repeat-containing protein At2g06000	AT2G06000.2	54.33	Pentatricopeptide repeat (PPR) superfamily protein		6.18659	5.18843	6.17149	6.99258	7.07856	-0.265478	0.244742	0.661707	0.15395	0.467761	0.60592	-0.0128749	0.961069	0.999219	0.17609	0.477458	0.569372
gene-LOC115705134	XP_060961391.1	1	protein FIP1	AT2G06005.1	76.92	FRIGIDA interacting protein 1		12.2147	13.1565	12.72	11.9056	18.0089	0.100855	0.654157	0.916465	-0.0613264	0.781255	0.858303	0.0519853	0.865039	0.996876	0.547649	0.0263379	0.0469718
gene-LOC115705133	XP_030488232.2	1	uncharacterized LOC115705133	AT1G77550.1	67.17	tubulin-tyrosine ligase		15.8393	13.8961	15.894	12.2244	28.2784	-0.197373	0.25432	0.672483	-0.398364	0.0221294	0.0539012	-0.00661916	0.975864	0.999496	0.821592	2.52433e-05	7.69908e-05
gene-LOC115706258	XP_030489707.1	1	protein OXIDATIVE STRESS 3 LIKE 1	AT5G21940.1	37.39	hybrid signal transduction histidine kinase M-like protein		36.9751	49.7065	45.0132	39.5992	24.0168	0.421005	0.0105723	0.102066	0.073773	0.639802	0.753103	0.273876	0.217408	0.782269	-0.636117	0.00386232	0.0082191
gene-LOC115704064	XP_030487146.1	1	uncharacterized LOC115704064	AT1G49290.1	32.81			0	0	0.0154918	0	0.073622	0	1	1	0	1	1	0	1	1	0	1	1
gene-LOC115708310	XP_030492402.2	1	uncharacterized LOC115708310	AT2G06010.1	74.29	OBP3-responsive protein 4 (ORG4)		21.1275	23.9739	23.4678	20.8929	13.2462	0.174844	0.383155	0.785802	-0.0357891	0.857707	0.912077	0.143647	0.592339	0.968773	-0.684177	0.00642696	0.0130724
gene-LOC115703651	XP_030486751.1	1	uncharacterized LOC115703651	AT3G42725.1	47.21	Putative membrane lipoprotein		24.9245	26.294	26.7853	11.9072	5.29012	0.0707123	0.693515	0.927334	-1.0938	3.56245e-07	2.66212e-06	0.0934858	0.681801	0.980067	-2.24641	2.95841e-18	2.85228e-17
gene-LOC115706642	XP_030490213.1	1	GCN5-related N-acetyltransferase 6, chloroplastic	AT2G06025.6	60.88	Acyl-CoA N-acyltransferases (NAT) superfamily protein		15.7967	15.165	12.2952	28.9042	42.4985	-0.0711169	0.718883	0.934566	0.846115	7.08683e-07	5.05299e-06	-0.371287	0.133026	0.647918	1.40982	2.52321e-12	1.62703e-11
gene-LOC133031049	XP_060960266.1	1	uncharacterized LOC133031049	AT5G45570.2	25.34	Ulp1 protease family protein;start_range=.,18472301		0	0	0	0	0	0	1	1	0	1	1	0	1	1	0	1	1
gene-LOC115705507	XP_030488710.2	1	uncharacterized LOC115705507	AT2G06040.1	44.62	F-box/LRR protein		12.4481	11.2762	11.1542	12.3093	141.799	-0.149798	0.408217	0.801333	-0.0418024	0.806355	0.876075	-0.172329	0.462089	0.939196	3.49144	2.84067e-83	2.16083e-81
gene-LOC115705616	XP_030488859.2	1	O-fucosyltransferase 35	AT5G35570.1	72.53	O-fucosyltransferase family protein		14.8257	12.7919	10.824	19.749	12.5644	-0.237832	0.17277	0.568542	0.379392	0.0139773	0.0364741	-0.487052	0.034212	0.319595	-0.259782	0.214115	0.293128
gene-LOC115704873	XP_030487945.1	1	MOB kinase activator-like 1A	AT5G45550.1	80.09	Mob1/phocein family protein		11.2289	10.2369	6.45233	39.5933	19.9605	-0.145597	0.611612	0.901765	1.784	4.39074e-16	9.64287e-15	-0.820189	0.0175715	0.211069	0.810593	0.00577728	0.0118706
gene-LOC115704500	XP_030487564.1	1	germin-like protein	AT5G20630.1	67.63	germin 3		2239.39	2777.59	1993.6	521.803	263.631	0.306363	0.0588102	0.317061	-2.12772	1.22691e-52	1.99802e-50	-0.176926	0.503292	0.948351	-3.09812	2.35861e-66	1.16005e-64
gene-LOC115704687	XP_030487747.2	1	probable glucan endo-1,3-beta-glucosidase BG4	AT5G20390.1	54.75	Glycosyl hydrolase superfamily protein		0	0	0	0.105616	0.348576	0	1	1	0	1	1	0	1	1	0	1	1
gene-LOC115706395	XP_030489896.2	1	MICOS complex subunit MIC10	AT1G72170.1	61.39	MICOS complex subunit%2C putative (DUF543)		7.75849	5.86663	6.08059	5.55897	9.89616	-0.410849	0.314107	0.734213	-0.519789	0.218667	0.343814	-0.366056	0.416541	0.916553	0.338291	0.427278	0.520752
gene-LOC115706393	XP_060961479.1	1	12-oxophytodienoate reductase 3-like	AT2G06050.3	72.8	oxophytodienoate-reductase 3;start_range=.,2359240		8.82788	7.8259	7.62406	37.2844	7.99038	-0.183395	0.467995	0.836371	2.05086	3.47373e-23	1.29791e-21	-0.225008	0.4464	0.933164	-0.155973	0.589014	0.672004
gene-LOC115706391	XP_030489891.2	1	12-oxophytodienoate reductase 3	AT2G06050.3	78.46	oxophytodienoate-reductase 3;start_range=.,2359240		46.7504	39.7713	39.5985	49.797	25.8484	-0.239981	0.122044	0.478809	0.0676321	0.640848	0.753823	-0.249276	0.225766	0.789212	-0.859314	4.73188e-06	1.60126e-05
gene-LOC115705077	XP_030488175.2	1	uncharacterized LOC115705077	AT5G35560.1	64.32	DENN (AEX-3) domain-containing protein		12.5589	12.1524	12.4681	16.4571	35.2693	-0.0306505	0.864248	0.972424	0.427773	0.00840171	0.0235458	-0.0159503	0.944199	0.997681	1.52706	6.58128e-15	5.11459e-14
gene-LOC115707489	XP_030491327.2	1	growth-regulating factor 1	AT3G13960.1	66.94	growth-regulating factor 5		25.0875	21.7434	24.6138	26.1124	8.8278	-0.220342	0.240401	0.657274	0.028815	0.857236	0.911857	-0.0354404	0.889931	0.996876	-1.52927	5.94088e-12	3.72254e-11
gene-LOC115707487	XP_030491326.2	1	protein CTR9 homolog	AT2G06210.1	88.24	binding protein		19.4304	19.4811	19.3201	21.7116	26.3108	-0.00523958	0.974926	0.994531	0.136316	0.364568	0.505098	-0.0192681	0.929124	0.997607	0.420485	0.034831	0.0602976
gene-LOC133031851	XP_060961571.1	1	ran-binding protein M homolog	AT1G35470.2	68.51	SPla/RYanodine receptor (SPRY) domain-containing protein		25.1378	24.2029	27.2413	30.2245	39.7109	-0.0612112	0.712769	0.932489	0.242088	0.109714	0.200878	0.106305	0.631944	0.975559	0.645275	0.00047572	0.00119626
gene-LOC115695977	XP_060961584.1	1	protein trichome birefringence-like 16	AT5G20680.5	52.62	TRICHOME BIREFRINGENCE-LIKE 16		15.8694	15.247	13.8079	13.7593	11.7158	-0.0551622	0.767272	0.94863	-0.236716	0.167202	0.279629	-0.218792	0.339076	0.874485	-0.464785	0.0281464	0.0498456
gene-LOC115725393	XP_030510765.2	1	uncharacterized LOC115725393	AT1G19110.1	60.79	inter-alpha-trypsin inhibitor heavy chain-like protein		11.3441	15.524	13.8428	13.3433	66.2326	0.455862	0.0112821	0.106375	0.307327	0.0766951	0.150702	0.302778	0.19069	0.74312	2.59323	3.76817e-47	1.12932e-45
gene-LOC115725394	XP_030510766.2	1	protein LAZ1 homolog 2	AT1G23070.1	70.16			0.210611	0.0878975	0.339783	0.51385	2.14852	0	1	1	0	1	1	0	1	1	3.23112	4.26092e-05	0.000125809
gene-LOC115707007	XP_030490662.2	1	protein DEEPER ROOTING 1	AT1G72490.2	33.76	hypothetical protein		0	0	0	0	0.0635385	0	1	1	0	1	1	0	1	1	0	1	1
gene-LOC133031871	XP_060961606.1	1	uncharacterized LOC133031871					0	0	0	0	0	0	1	1	0	1	1	0	1	1	0	1	1
gene-LOC115705405	XP_030488600.2	1	sm-like protein LSM1B	AT3G14080.2	82.03	Small nuclear ribonucleoprotein family protein		7.51245	6.35494	7.38645	10.8295	4.49978	-0.249804	0.422492	0.810251	0.530214	0.0579021	0.119974	-0.0349744	0.918258	0.997387	-0.735457	0.0498217	0.0827994
gene-LOC115705403	XP_030488598.2	1	uncharacterized LOC115705403	AT1G19130.1	67.37	RmlC-like jelly roll fold protein		1.29424	1.00645	1.36214	1.24846	1.92801	0	1	1	-0.115247	0.881272	0.927545	0.0358783	0.963241	0.999246	0.553236	0.462014	0.554305
gene-LOC115704780	XP_030487846.2	1	uncharacterized LOC115704780	AT1G19130.1	67.72	RmlC-like jelly roll fold protein		12.5772	19.6092	23.3285	25.0707	10.2846	0.632007	0.00815071	0.0843883	0.96307	6.83279e-06	4.0954e-05	0.876294	0.00109576	0.0269352	-0.308365	0.291962	0.381575
gene-LOC115705402	XP_030488597.1	1	uncharacterized LOC115705402	AT1G19140.1	62.38	ubiquinone biosynthesis COQ9-like protein		25.3834	26.4272	25.4986	25.6671	47.5075	0.0264414	0.882196	0.977157	-0.0259646	0.880978	0.927453	-0.00349016	0.987674	0.999496	0.890301	7.62493e-06	2.5133e-05
gene-LOC115707656	XP_030491540.1	1	pollen receptor-like kinase 3	AT3G42880.1	52.17	Leucine-rich repeat protein kinase family protein		1.14152	1.1576	0.980866	0.749023	0.767856	0.0213223	0.960797	0.991445	-0.629553	0.200343	0.322035	-0.220815	0.651255	0.977529	-0.577027	0.284923	0.373981
gene-LOC115707657	XP_030491542.2	1	photosystem I chlorophyll a/b-binding protein 6, chloroplastic	AT1G19150.1	83.41	PSI type II chlorophyll a/b-binding protein (Lhca2*1)		110.01	145.982	112.725	48.067	34.2066	0.405494	0.0277566	0.197306	-1.2199	7.85497e-13	1.26133e-11	0.0282674	0.913461	0.997278	-1.69593	1.70394e-15	1.38475e-14
gene-LOC115705394	XP_030488589.2	1	probable polygalacturonase	AT1G19170.1	76.44	Pectin lyase-like superfamily protein		22.5358	21.7856	20.8567	20.5669	17.3308	-0.058014	0.739034	0.94122	-0.157297	0.349339	0.48953	-0.125146	0.604594	0.970504	-0.395024	0.0583094	0.0951437
gene-LOC133031145	XP_060960539.1	1	uncharacterized LOC133031145	AT3G05850.1	31.3	MuDR family transposase		0	0	0	0	0	0	1	1	0	1	1	0	1	1	0	1	1
gene-LOC133031896	XP_060961646.1	1	uncharacterized LOC133031896					0	0	0	0	0	0	1	1	0	1	1	0	1	1	0	1	1
gene-LOC133031902	XP_060961651.1	1	uncharacterized LOC133031902	AT1G55420.1	30.53	Cysteine/Histidine-rich C1 domain family protein		0	0	0	0	0	0	1	1	0	1	1	0	1	1	0	1	1
gene-LOC133029107	XP_060957571.1	1	uncharacterized LOC133029107					0	0	0	0	0	0	1	1	0	1	1	0	1	1	0	1	1
gene-LOC133031908	XP_060961659.1	1	uncharacterized LOC133031908					0.0311177	0	0.034235	0.0509664	0.0172998	0	1	1	0	1	1	0	1	1	0	1	1
gene-LOC115706226	XP_030489664.2	1	protein TIFY 10A	AT1G19180.3	44.4	jasmonate-zim-domain protein 1		72.637	60.6362	76.0864	79.9701	64.4235	-0.265306	0.141023	0.518349	0.114832	0.459001	0.597888	0.0594842	0.791107	0.993364	-0.18568	0.353542	0.446016
gene-LOC115706469	XP_030489986.1	1	oligouridylate-binding protein 1	AT1G17370.1	75	oligouridylate binding protein 1B		129.345	132.128	145.779	106.466	110.726	0.0232073	0.863693	0.972036	-0.306088	0.0111444	0.0300585	0.161526	0.394772	0.904097	-0.239525	0.16059	0.229586
gene-LOC115706470	XP_030489987.2	1	FCS-Like Zinc finger 13	AT1G74940.1	42.64	cyclin-dependent kinase%2C putative (DUF581)		23.7857	38.1298	35.0593	43.4455	20.0111	0.673908	5.51566e-05	0.00161835	0.842845	8.05363e-08	6.72578e-07	0.549221	0.0156928	0.195305	-0.262974	0.207677	0.285512
gene-LOC133031184	XP_060960624.1	1	uncharacterized LOC133031184	AT4G29090.1	28.45	Ribonuclease H-like superfamily protein;start_range=.,14333528		0	0	0	0	0.09229	0	1	1	0	1	1	0	1	1	0	1	1
gene-LOC115704711	XP_030487770.1	1	ethylene-responsive transcription factor ERF017-like	AT1G19210.1	54.08	Integrase-type DNA-binding superfamily protein	PK18548.1	0.294852	0.0646495	0.29539	0.374347	0.361511	0	1	1	0	1	1	0	1	1	0	1	1
gene-LOC115705569	XP_030488797.2	1	20 kDa chaperonin, chloroplastic	AT5G20720.4	75	chaperonin 20		586.72	576.758	571.381	201.39	354.86	-0.0352604	0.78878	0.95396	-1.57243	8.47048e-40	7.86116e-38	-0.0522536	0.786473	0.992996	-0.742643	5.47608e-06	1.83928e-05
gene-LOC115705617	XP_030488861.2	1	auxin response factor 19	AT1G19220.1	82.4	auxin response factor 19	PK17611.1	19.6212	20.5491	18.0386	26.4745	9.62758	0.0599698	0.693001	0.927334	0.483562	0.000305763	0.00127737	-0.156358	0.448343	0.934248	-1.03891	1.50464e-07	6.12778e-07
gene-LOC133031214	XP_060960657.1	1	uncharacterized LOC133031214	AT4G29090.1	24.37	Ribonuclease H-like superfamily protein;start_range=.,14333528		0	0	0	0	0	0	1	1	0	1	1	0	1	1	0	1	1
gene-LOC133031930	XP_060961698.1	1	uncharacterized LOC133031930					0	0	0	0	0	0	1	1	0	1	1	0	1	1	0	1	1
gene-LOC115706023	XP_030489380.2	1	DEAD-box ATP-dependent RNA helicase 17	AT2G40700.1	64.32	P-loop containing nucleoside triphosphate hydrolases superfamily protein		10.7742	9.95015	10.0118	14.1902	10.2818	-0.123576	0.542718	0.873763	0.370857	0.0507012	0.107863	-0.116996	0.639947	0.976217	-0.0842593	0.714303	0.780473
gene-LOC133031239	XP_060960692.1	1	uncharacterized LOC133031239	AT4G29090.1	32.19	Ribonuclease H-like superfamily protein;start_range=.,14333528		0	0	0	0	0.014444	0	1	1	0	1	1	0	1	1	0	1	1
gene-LOC115708104	XP_060961719.1	1	uncharacterized LOC115708104					11.033	10.6328	9.51911	12.7271	14.7007	-0.0969675	0.692841	0.927334	0.16072	0.492613	0.627749	-0.282493	0.331512	0.86966	0.366588	0.18314	0.256433
gene-LOC133031372	XP_060960850.1	1	uncharacterized LOC133031372	AT1G43760.1	28.77			0	0	0	0	0	0	1	1	0	1	1	0	1	1	0	1	1
gene-LOC115705186	XP_030488296.2	1	3-oxoacyl-[acyl-carrier-protein] synthase II, chloroplastic	AT1G74960.3	73.33	fatty acid biosynthesis 1		53.6939	51.5662	46.5332	35.6251	39.7485	-0.0676301	0.651384	0.915899	-0.614352	2.39476e-06	1.55876e-05	-0.210244	0.289541	0.843151	-0.436973	0.0233221	0.0420657
gene-LOC115705185	XP_030488295.2	1	uncharacterized LOC115705185	AT2G34357.1	54.37	ARM repeat superfamily protein		31.9354	34.7559	37.0772	39.1324	30.3462	0.113117	0.456448	0.829156	0.270389	0.0395826	0.0880229	0.204283	0.313146	0.858633	-0.0897457	0.604746	0.686116
gene-LOC115707266	XP_030491036.2	1	pectinesterase inhibitor 3	AT5G20740.1	51.46	Plant invertase/pectin methylesterase inhibitor superfamily protein		73.1031	77.0764	67.2259	91.3467	79.3209	0.0689028	0.661206	0.9192	0.293467	0.0284966	0.0666724	-0.132984	0.527578	0.956143	0.102412	0.558989	0.645627
gene-LOC115704774	XP_030487838.2	1	uncharacterized LOC115704774	AT3G43110.1	41.12	transmembrane protein		2.71272	3.44515	3.15353	6.42789	2.74479	0.35183	0.427584	0.812885	1.23141	0.00144864	0.00507024	0.20406	0.677649	0.979766	0.0204569	0.969142	0.978187
gene-LOC115704111	XP_030487190.2	1	probable flavin-containing monooxygenase 1	AT1G19250.1	67.18	flavin-dependent monooxygenase 1		0	0.0182438	0	0.0741822	0.483356	0	1	1	0	1	1	0	1	1	0	1	1
gene-LOC115706675	XP_060961753.1	1	probable flavin-containing monooxygenase 1	AT1G19250.1	61.72	flavin-dependent monooxygenase 1		0	0	0	0.0146617	0.0794326	0	1	1	0	1	1	0	1	1	0	1	1
gene-LOC115704816	XP_060961760.1	1	probable flavin-containing monooxygenase 1	AT1G19250.1	61.64	flavin-dependent monooxygenase 1		0.0401145	0.133168	0.0614269	0.0779314	0.105979	0	1	1	0	1	1	0	1	1	0	1	1
gene-LOC115696808	XP_060957902.1	1	uncharacterized LOC115696808					0	0	0	0	0	0	1	1	0	1	1	0	1	1	0	1	1
gene-LOC115708136	XP_030492193.1	1	peroxiredoxin Q, chloroplastic	AT3G26060.1	69.34	Thioredoxin superfamily protein		303.178	365.946	296.831	94.7448	76.9099	0.267286	0.124044	0.482353	-1.70284	2.50757e-28	1.34846e-26	-0.0392966	0.888744	0.996876	-1.98994	1.38354e-24	1.88162e-23
gene-LOC115705424	XP_030488618.2	1	uncharacterized LOC115705424	AT1G19240.1	74.51	transmembrane protein		24.6014	19.7911	22.3202	17.6567	18.0482	-0.311539	0.241757	0.658562	-0.505444	0.0673953	0.135734	-0.14401	0.641638	0.976217	-0.450936	0.13895	0.203362
gene-LOC115705423	XP_030488617.1	1	respiratory burst oxidase homolog protein E	AT1G19230.2	65.35	Riboflavin synthase-like superfamily protein;start_range=.,6644189		0.302781	0.383177	0.391612	0.715329	7.4251	0.306706	0.598339	0.897087	1.20122	0.0177101	0.0445385	0.355202	0.568739	0.96639	4.57384	1.20333e-41	3.05546e-40
gene-LOC115704779	XP_060961754.1	1	uncharacterized LOC115704779	AT4G21090.3	63.37	MITOCHONDRIAL FERREDOXIN 2		14.3329	15.3224	13.9448	12.6976	11.9945	0.0877096	0.732926	0.939628	-0.208223	0.404035	0.544284	-0.052267	0.858067	0.99684	-0.271128	0.341881	0.43365
gene-LOC133031510	XP_060961026.1	1	ABC transporter I family member 10-like	AT4G33460.1	74.55	ABC transporter family protein		0	0	0	0	0	0	1	1	0	1	1	0	1	1	0	1	1
gene-LOC133031570	XP_060961097.1	1	uncharacterized LOC133031570					0	0	0	0	0	0	1	1	0	1	1	0	1	1	0	1	1
gene-LOC115704674	XP_030487732.1	1	uncharacterized LOC115704674	AT5G20810.1	69.75	SAUR-like auxin-responsive protein family		1.75657	1.01914	1.16805	1.28275	2.03985	-0.779003	0.214412	0.627458	-0.451645	0.454805	0.593771	-0.619103	0.340601	0.874678	0.237814	0.701683	0.770237
gene-LOC115707063	XP_030490751.2	1	putative pectinesterase 63	AT5G61680.1	46.97	Pectin lyase-like superfamily protein		0.139329	0.0366796	0.057024	0.952564	0.677955	0	1	1	2.65253	0.00324456	0.0102484	0	1	1	0	1	1
gene-LOC133031609	XP_060961107.1	1	secreted RxLR effector protein 161-like	AT4G23160.3	34.64	cysteine-rich RECEPTOR-like kinase;start_range=.,12131325		0	0	0	0	0	0	1	1	0	1	1	0	1	1	0	1	1
gene-LOC115707253	XP_030491010.2	1	putative pectinesterase 63	AT5G61680.1	48.57	Pectin lyase-like superfamily protein		0	0	0.0288234	0.137595	0.902921	0	1	1	0	1	1	0	1	1	0	1	1
gene-LOC133029116	XP_060957577.1	1	probable mitochondrial import inner membrane translocase subunit TIM21	AT4G00026.1	74.77	import inner membrane translocase subunit		7.0102	11.2309	8.7873	5.59633	5.56797	0.658522	0.21831	0.631962	-0.371199	0.574877	0.698103	0.271847	0.666707	0.978814	-0.363049	0.629752	0.708308
gene-LOC133031668	XP_060961179.1	1	uncharacterized LOC133031668					0	0	0	0	0	0	1	1	0	1	1	0	1	1	0	1	1
gene-LOC115703914	XP_030487009.1	1	auxin-responsive protein SAUR76	AT5G20820.1	51.54	SAUR-like auxin-responsive protein family		12.268	11.8694	13.9663	18.1345	13.5232	-0.0523909	0.831943	0.964516	0.538154	0.0221766	0.0540084	0.177286	0.563154	0.965903	0.127163	0.647804	0.723265
gene-LOC115704781	XP_030487847.2	1	pentatricopeptide repeat-containing protein At1g59720, chloroplastic/mitochondrial	AT1G59720.1	61.78	Tetratricopeptide repeat (TPR)-like superfamily protein		0.786443	0.723047	0.638094	0.682142	0.829356	-0.116302	0.791059	0.954431	-0.212023	0.643771	0.756041	-0.308513	0.526811	0.956015	0.0595682	0.904063	0.930551
gene-LOC133031750	XP_060961376.1	1	uncharacterized LOC133031750	AT4G00980.1	35.46	zinc knuckle (CCHC-type) family protein		0	0	0	0	0	0	1	1	0	1	1	0	1	1	0	1	1
gene-LOC115707093	XP_060961803.1	1	replication protein A 70 kDa DNA-binding subunit B-like	AT5G61000.1	23.76	Replication factor-A protein 1-like protein		0.11704	0.110202	0.175266	0.11589	0.228084	0	1	1	0	1	1	0	1	1	0	1	1
gene-LOC115705482	XP_030488681.2	1	uncharacterized LOC115705482	AT2G03140.9	43.68	alpha/beta-Hydrolases superfamily protein		1.91443	2.45902	2.40109	4.63061	6.16974	0.381421	0.129867	0.49449	1.25768	6.061e-09	5.95475e-08	0.303188	0.296748	0.847296	1.68628	2.31571e-12	1.4997e-11
gene-LOC115705483	XP_030488683.2	1	sucrose synthase	AT3G43190.2	85.07	sucrose synthase 4		62.1364	47.9437	104.007	87.3915	35.27	-0.379962	0.0100112	0.0982024	0.466234	8.61373e-05	0.00041086	0.733386	0.00019825	0.00642314	-0.840264	4.32634e-06	1.47151e-05
gene-LOC133031767	XP_060961415.1	1	uncharacterized LOC133031767	AT1G64253.1	26.11	DEK carboxy-terminal domain protein;start_range=.,23842843		0	0	0	0	0	0	1	1	0	1	1	0	1	1	0	1	1
gene-LOC115707516	XP_030491374.2	1	kinesin-like protein KIN-7B	AT3G43210.5	68.98	ATP binding microtubule motor family protein		14.221	15.1231	15.5466	13.3983	50.9267	0.0766383	0.643411	0.91365	-0.113058	0.468744	0.606907	0.115674	0.603424	0.97002	1.82212	6.42651e-19	6.44518e-18
gene-LOC115707065	XP_030490754.2	1	eukaryotic translation initiation factor 3 subunit K	AT4G33250.1	75.66	eukaryotic translation initiation factor 3K		143.899	164.323	188.452	119.963	292.515	0.184771	0.196778	0.60254	-0.290938	0.0241715	0.058072	0.377767	0.0503357	0.403382	1.00989	5.27309e-10	2.75904e-09
gene-LOC115708316	XP_030492409.2	1	phosphoinositide phosphatase SAC3	AT3G43220.1	61.56	Phosphoinositide phosphatase family protein		33.6613	26.3896	27.0504	39.3464	22.4262	-0.358713	0.0117685	0.109728	0.203353	0.100406	0.187333	-0.325718	0.0945143	0.550781	-0.601367	0.000374386	0.000959043
gene-LOC115705553	XP_030488772.2	1	suppressor of mec-8 and unc-52 protein homolog 2	AT2G26460.1	69.62	RED family protein		30.4939	28.819	32.2548	35.7159	45.3094	-0.0888377	0.590354	0.895285	0.203293	0.161629	0.272358	0.0706384	0.749525	0.989913	0.556146	0.00206068	0.00460919
gene-LOC115708199	XP_030492269.1	1	uncharacterized LOC115708199	AT5G20220.4	61.67	zinc knuckle (CCHC-type) family protein		4.81433	6.66578	6.42812	3.38863	3.25566	0.463105	0.0181267	0.14691	-0.527233	0.0224936	0.0546419	0.407684	0.0928304	0.545571	-0.577008	0.0271298	0.0482356
gene-LOC115706084	XP_030489460.2	1	hydroquinone glucosyltransferase	AT4G01070.1	50	UDP-Glycosyltransferase superfamily protein		0.0786107	5.53069	11.1139	5.46869	8.8771	5.95064	2.29106e-13	4.27232e-11	5.90982	4.04048e-13	6.73232e-12	6.95349	1.87003e-18	1.65242e-15	6.62824	1.46401e-16	1.27335e-15
gene-LOC115706119	XP_030489513.1	1	uncharacterized LOC115706119	AT3G43230.1	73.92	RING/FYVE/PHD-type zinc finger family protein		15.122	16.8862	18.9243	17.0935	26.8242	0.152207	0.417056	0.806837	0.152978	0.37973	0.520603	0.312837	0.197906	0.754411	0.812146	8.69559e-05	0.000244599
gene-LOC115713770	XP_030498113.2	1	uncharacterized LOC115713770	AT1G40390.1	27.95			0	0	0	0	0	0	1	1	0	1	1	0	1	1	0	1	1
gene-LOC115705079	XP_030488179.2	1	E3 ubiquitin-protein ligase RSL1	AT3G53690.1	45.6	RING/U-box superfamily protein		0.888972	0.814558	0.978714	1.69776	3.48714	-0.127668	0.865899	0.973433	0.92279	0.159442	0.26962	0.142977	0.851945	0.996523	1.96626	0.000931265	0.0022199
gene-LOC115705045	XP_030488143.2	1	transcription factor LRL3	AT2G24260.2	56.22	LJRHL1-like 1		1.05253	0.650045	0.399655	0.487206	3.30923	-0.709303	0.221313	0.635465	-1.18497	0.0647135	0.131221	-1.44961	0.0380307	0.341456	1.62459	0.00132965	0.00307205
gene-LOC115705492	XP_060961892.1	1	1-phosphatidylinositol-3-phosphate 5-kinase FAB1A	AT3G14270.2	57.19	phosphatidylinositol-4-phosphate 5-kinase family protein		13.6821	17.0968	14.9462	18.2972	12.8772	0.309813	0.0849681	0.39186	0.396717	0.00448917	0.0136023	0.116952	0.636736	0.975904	-0.106218	0.578562	0.66269
gene-LOC115706980	XP_030490628.2	1	conserved oligomeric Golgi complex subunit 3	AT1G73430.2	80.74	sec34-like family protein		27.0461	23.8738	23.5425	25.9237	23.7589	-0.186815	0.233326	0.648543	-0.0835954	0.556016	0.682546	-0.209469	0.309855	0.857807	-0.200699	0.280202	0.36889
gene-LOC115704735	XP_030487805.1	1	DNA repair protein RAD51 homolog	AT5G20850.1	91.47	RAS associated with diabetes protein 51		16.7063	19.0698	21.4541	12.3364	160.557	0.183295	0.369912	0.776556	-0.466533	0.0285179	0.066695	0.35083	0.169374	0.712509	3.24872	1.12144e-57	4.3482e-56
gene-LOC115706869	XP_030490488.2	1	pectinesterase	AT5G20860.2	49.82	Plant invertase/pectin methylesterase inhibitor superfamily;start_range=.,7076890		47.0277	63.4483	44.7269	16.5659	19.4739	0.419321	0.491704	0.84883	-1.53384	0.0141594	0.036849	-0.0916493	0.889921	0.996876	-1.29187	0.0300868	0.0529424
gene-LOC115704283	XP_030487357.2	1	putative invertase inhibitor	AT5G64620.1	33.33	cell wall / vacuolar inhibitor of fructosidase 2		0.068387	0	0	0.198052	0	0	1	1	0	1	1	0	1	1	0	1	1
gene-LOC115707106	XP_030490814.2	1	putative pectinesterase/pectinesterase inhibitor 45	AT2G26450.1	49.76	Plant invertase/pectin methylesterase inhibitor superfamily		0	0	0.013314	0.550279	0.403457	0	1	1	6.81422	5.37804e-05	0.000269323	0	1	1	0	1	1
gene-LOC115702126	XP_030485444.2	1	probable pectinesterase/pectinesterase inhibitor 12	AT2G26440.1	67.75	Plant invertase/pectin methylesterase inhibitor superfamily		6.0904	4.92651	5.87683	8.9336	4.26306	-0.31318	0.194873	0.599882	0.52788	0.0125956	0.0333629	-0.0604789	0.838629	0.995797	-0.53024	0.0583087	0.0951437
gene-LOC115702125	XP_030485443.1	1	pectinesterase/pectinesterase inhibitor PPE8B	AT3G43270.1	66.28	Plant invertase/pectin methylesterase inhibitor superfamily		50.4005	45.9355	46.779	83.9611	50.1412	-0.142409	0.351652	0.764776	0.711267	2.94077e-08	2.60861e-07	-0.119094	0.555077	0.96417	-0.0230464	0.897518	0.925459
gene-LOC115718502	XP_060957592.1	1	replication protein A 70 kDa DNA-binding subunit D-like	AT5G08020.1	26.86	RPA70-kDa subunit B		0.135585	0.0738081	0.0769375	0	0.609992	0	1	1	0	1	1	0	1	1	0	1	1
gene-LOC133031990	XP_060961792.1	1	uncharacterized LOC133031990					0	0	0	0	0.480502	0	1	1	0	1	1	0	1	1	0	1	1
gene-LOC133032028	XP_060961833.1	1	uncharacterized LOC133032028					0	0	0	0	0	0	1	1	0	1	1	0	1	1	0	1	1
gene-LOC115705496	XP_030488694.2	1	alpha-aminoadipic semialdehyde synthase	AT4G33150.4	72.92	lysine-ketoglutarate reductase/saccharopine dehydrogenase bifunctional enzyme		5.02265	5.41758	5.09827	14.4094	9.84475	0.101149	0.664329	0.91995	1.49611	5.59577e-18	1.45036e-16	0.0115976	0.964683	0.999246	0.954222	1.79521e-05	5.60286e-05
gene-LOC133032114	XP_060961946.1	1	uncharacterized LOC133032114	AT4G09490.1	34.88	Polynucleotidyl transferase%2C ribonuclease H-like superfamily protein		0	0	0	0	0	0	1	1	0	1	1	0	1	1	0	1	1
gene-LOC115705497	XP_030488697.2	1	uncharacterized LOC115705497	AT4G33140.1	67.17	Haloacid dehalogenase-like hydrolase (HAD) superfamily protein		29.139	25.8587	29.3662	24.0055	115.903	-0.204725	0.214204	0.62718	-0.315638	0.0426352	0.093492	-0.00531607	0.980195	0.999496	1.95271	1.60807e-26	2.37598e-25
gene-LOC115705503	XP_030488706.2	1	glucan endo-1,3-beta-glucosidase 5	AT5G20870.1	61.81	O-Glycosyl hydrolases family 17 protein		1.18191	1.2356	1.08742	0.774734	1.51175	0.051318	0.920665	0.982713	-0.632629	0.270239	0.405077	-0.12696	0.820108	0.995721	0.340705	0.5356	0.624137
gene-LOC115705502	XP_030488705.2	1	brefeldin A-inhibited guanine nucleotide-exchange protein 5	AT3G43300.3	75.15	HOPM interactor 7		28.5514	24.5604	24.9689	26.5037	29.0178	-0.225602	0.116838	0.467772	-0.12908	0.289732	0.426409	-0.204	0.331473	0.86966	0.00836274	0.959155	0.97018
gene-LOC115703759	XP_030486853.1	1	E3 ubiquitin-protein ligase RHA1B	AT5G20885.1	44.5	RING/U-box superfamily protein		15.1551	13.2731	17.3858	24.4809	48.9946	-0.20035	0.419836	0.808431	0.663767	0.00114707	0.00413032	0.186835	0.524318	0.954855	1.67817	6.36519e-15	4.95739e-14
gene-LOC115707165	XP_060961954.1	1	uncharacterized LOC115707165	AT2G26210.7	53.69	Ankyrin repeat family protein		31.809	32.298	33.5806	41.16	41.4766	0.0134909	0.940263	0.986432	0.338841	0.0409993	0.0904911	0.0620214	0.776706	0.992834	0.364076	0.0601748	0.0978495
gene-LOC133032153	XP_060962001.1	1	uncharacterized LOC133032153	AT5G36228.1	25.7			0	0	0	0	0.0769785	0	1	1	0	1	1	0	1	1	0	1	1
gene-LOC115705512	XP_030488715.2	1	protein TIFY 3B	AT5G20900.1	44.3	jasmonate-zim-domain protein 12		162.121	155	161.799	235.568	122.409	-0.0731594	0.610367	0.901635	0.510294	4.57029e-05	0.000232721	-0.0158029	0.935943	0.997607	-0.421175	0.0147471	0.0278761
gene-LOC115705511	XP_030488714.1	1	protein FATTY ACID EXPORT 2, chloroplastic	AT3G43520.1	70.34	Transmembrane proteins 14C		102.382	79.0115	93.9496	86.8676	99.9415	-0.381257	0.0127309	0.115483	-0.267369	0.0539074	0.113399	-0.1367	0.503108	0.948351	-0.0485968	0.782767	0.834952
gene-LOC133032129	XP_060961960.1	1	uncharacterized LOC133032129	AT5G45570.2	27.88	Ulp1 protease family protein;start_range=.,18472301		0.0276985	0.0103389	0.0171459	0.0106006	0.0269407	0	1	1	0	1	1	0	1	1	0	1	1
gene-LOC133032135	XP_060961968.1	1	uncharacterized LOC133032135	AT1G06740.1	27.87	MuDR family transposase		0.15465	0	0	0	0.258004	0	1	1	0	1	1	0	1	1	0	1	1
gene-LOC115704678	XP_030487735.2	1	mitochondrial import receptor subunit TOM5 homolog	AT5G08040.1	55.56	mitochondrial import receptor subunit TOM5-like protein		49.5106	51.4288	56.365	29.234	70.8283	0.0216249	0.919047	0.982713	-0.772628	0.000155745	0.000698848	0.151848	0.523525	0.954855	0.540505	0.0140633	0.0266903
gene-LOC133032229	XP_060962097.1	1	uncharacterized mitochondrial protein AtMg00820-like	AT4G23160.3	41.12	cysteine-rich RECEPTOR-like kinase;start_range=.,12131325		0	0	0	0	0	0	1	1	0	1	1	0	1	1	0	1	1
gene-LOC115706201	XP_030489630.2	1	uncharacterized LOC115706201	AT2G46900.1	55.73	transcription factor-like protein		15.2954	14.3162	13.234	18.1234	129.413	-0.103934	0.556432	0.881733	0.221141	0.172308	0.286549	-0.220588	0.329458	0.868393	3.06474	3.94105e-70	2.1636e-68
gene-LOC115704095	XP_030487175.2	1	uncharacterized protein C594.04c	AT2G46890.1	70.52	3-oxo-5-alpha-steroid 4-dehydrogenase (DUF1295)		14.1932	15.7724	14.5767	15.9104	8.11568	0.145601	0.501263	0.854776	0.136611	0.496427	0.631241	0.0281441	0.912857	0.997278	-0.818835	0.00353153	0.00757173
gene-LOC115704755	XP_030487819.2	1	probable inactive purple acid phosphatase 29	AT5G63140.1	65.4	purple acid phosphatase 29		7.40549	1.86726	10.1713	9.03781	12.2088	-2.00636	3.12677e-08	2.20135e-06	0.27259	0.331574	0.471274	0.475652	0.132565	0.647287	0.719056	0.0612921	0.0994141
gene-LOC133032303	XP_060962192.1	1	uncharacterized LOC133032303	AT1G40390.1	28.05			0	0	0	0	0	0	1	1	0	1	1	0	1	1	0	1	1
gene-LOC115705588	XP_030488821.2	1	probable inactive purple acid phosphatase 29	AT5G63140.1	66.75	purple acid phosphatase 29		31.6464	26.9331	29.4108	45.2442	17.8459	-0.240064	0.145419	0.52309	0.490836	0.000592053	0.00230025	-0.116376	0.582478	0.967664	-0.839726	2.56853e-05	7.82026e-05
gene-LOC115705505	XP_030488708.2	1	pentatricopeptide repeat-containing protein At4g01570	AT4G01570.1	61.82	Tetratricopeptide repeat (TPR)-like superfamily protein		4.96075	4.2606	4.2692	3.704	4.55297	-0.224047	0.329741	0.747906	-0.441726	0.0589538	0.121788	-0.225611	0.408129	0.913714	-0.138781	0.595231	0.677546
gene-LOC115704689	XP_030487749.2	1	WAT1-related protein At3g30340	AT3G30340.1	49.3	nodulin MtN21 /EamA-like transporter family protein		0	0.0428478	0.0962999	0.0358675	0.0976463	0	1	1	0	1	1	0	1	1	0	1	1
gene-LOC115704968	XP_030488048.2	1	uncharacterized LOC115704968	AT2G41610.1	54.33	transmembrane protein		0.935373	0.692635	0.737615	0.86234	0.488101	-0.419036	0.605337	0.899919	-0.110785	0.886847	0.93085	0	1	1	0	1	1
gene-LOC115706089	XP_030489469.2	1	uncharacterized calcium-binding protein At1g02270	AT5G54130.2	64.91	Calcium-binding endonuclease/exonuclease/phosphatase family		17.3083	19.3633	16.989	21.763	27.3779	0.154295	0.402844	0.797418	0.305521	0.0769736	0.151059	-0.0373457	0.873283	0.996876	0.64854	0.00185503	0.00417731
gene-LOC115704045	XP_030487126.2	1	NAC domain-containing protein 89	AT4G35580.3	47.22	NAC transcription factor-like 9	PK00547.1	1.2099	0.82965	1.63044	4.49989	2.57115	-0.546207	0.372315	0.778519	1.87553	4.31998e-06	2.67569e-05	0.416899	0.456656	0.937217	1.08228	0.043609	0.0735953
gene-LOC115708110	XP_030492164.2	1	NAC domain-containing protein 72	AT4G35580.3	50	NAC transcription factor-like 9		3.77302	2.891	4.22698	10.2123	5.8231	-0.388284	0.238991	0.656033	1.41295	2.13018e-08	1.91616e-07	0.156435	0.65031	0.977471	0.614155	0.0618862	0.100293
gene-LOC115707050	XP_030490730.2	1	NAC domain-containing protein 71-like	AT4G35580.1	42.33	NAC transcription factor-like 9		4.94662	6.98112	7.82465	18.4061	6.61646	0.489123	0.0545531	0.303074	1.86449	4.93169e-19	1.38424e-17	0.644302	0.043399	0.370991	0.39883	0.170142	0.241013
gene-LOC133032182	XP_060962034.1	1	uncharacterized LOC133032182					0.049906	0.0540331	0.0439781	0	0.006685	0	1	1	0	1	1	0	1	1	0	1	1
gene-LOC115704050	XP_030487132.2	1	uncharacterized LOC115704050	AT4G01550.1	34.64	NAC domain containing protein 69		0.369138	0.232214	0.271302	0.913051	0.710646	-0.649071	0.393706	0.792866	1.30815	0.0194047	0.0482033	-0.437359	0.581182	0.967407	0.94863	0.152107	0.219245
gene-LOC115708192	XP_030492258.2	1	uncharacterized LOC115708192	AT1G33280.1	37.01	NAC domain containing protein 15	PK23050.1	0.314375	0.349717	1.56099	0.566512	0.283548	0.143892	0.830381	0.964387	0.834141	0.17977	0.296162	2.31354	1.74387e-06	0.000106465	-0.140955	0.857866	0.894488
gene-LOC115704732	XP_030487798.2	1	NAC domain-containing protein 14-like	AT4G35580.2	46.1	NAC transcription factor-like 9		1.31432	0.474892	0.579646	0.819812	0.814407	-1.46349	0.0024584	0.0348474	-0.693018	0.117842	0.212625	-1.19331	0.0314002	0.303499	-0.706116	0.167409	0.237763
gene-LOC115704904	XP_030487977.2	1	protein ARV 2	AT1G01020.1	49.3	ARV1 family protein		8.20553	7.3515	7.38953	7.12821	14.9212	-0.194357	0.551947	0.879516	-0.267447	0.415512	0.555329	-0.195319	0.603598	0.970138	0.859166	0.00643333	0.0130838
gene-LOC115703566	XP_030486653.2	1	B3 domain-containing protein Os03g0120900	AT3G61970.1	75.56	AP2/B3-like transcriptional factor family protein		14.0831	12.9959	10.7312	18.4147	4.58333	-0.125181	0.50176	0.854982	0.360573	0.0446446	0.0971454	-0.405532	0.0866298	0.532177	-1.63704	2.46723e-11	1.4671e-10
gene-LOC133032413	XP_060962344.1	1	uncharacterized LOC133032413					0	0	0	0	0	0	1	1	0	1	1	0	1	1	0	1	1
gene-LOC115704048	XP_030487130.2	1	uncharacterized LOC115704048	AT2G07760.1	23.27			0	0	0	0	0	0	1	1	0	1	1	0	1	1	0	1	1
gene-LOC133032498	XP_060962459.1	1	uncharacterized LOC133032498					0	0	0	0	0	0	1	1	0	1	1	0	1	1	0	1	1
gene-LOC133029137	XP_060957598.1	1	uncharacterized LOC133029137	AT5G53670.1	27.52	transmembrane protein;start_range=.,21796997		0.0248058	0	0.025666	0	0.221871	0	1	1	0	1	1	0	1	1	0	1	1
gene-LOC115706055	XP_030489429.2	1	endoribonuclease Dicer homolog 1	AT1G01040.1	74.57	dicer-like 1		6.98866	8.58771	7.79457	9.97246	9.57059	0.288331	0.0823443	0.384633	0.490727	0.00103318	0.003765	0.146107	0.515274	0.952327	0.436097	0.0462437	0.0775349
gene-LOC115705847	XP_030489153.1	1	soluble inorganic pyrophosphatase 1	AT2G46860.1	88.07	pyrophosphorylase 3		59.5103	52.9645	57.3438	71.7881	84.9672	-0.174886	0.275162	0.696126	0.243271	0.0896429	0.171136	-0.0645442	0.757366	0.990708	0.499056	0.00675422	0.0136946
gene-LOC115704054	XP_030487135.2	1	probably inactive receptor-like protein kinase At2g46850	AT2G46850.1	54.66	Protein kinase superfamily protein		0	0.0371025	0.0382364	0.101039	0.165394	0	1	1	0	1	1	0	1	1	0	1	1
gene-LOC115705225	XP_030488353.2	1	serine/threonine-protein kinase ATG1a	AT3G61960.1	53.64	Protein kinase superfamily protein		9.55473	7.82653	9.26516	9.14327	10.1256	-0.25879	0.218863	0.632297	-0.0260578	0.891145	0.934054	-0.0774042	0.76796	0.991668	0.13814	0.537676	0.625883
gene-LOC115705224	XP_030488352.2	1	protein LATE ELONGATED HYPOCOTYL	AT1G01060.8	43.41	Homeodomain-like superfamily protein	PK20866.1	2.64437	1.6146	2.02667	2.73402	7.05485	-0.727066	0.0250852	0.183578	0.0290445	0.919983	0.951456	-0.471979	0.162455	0.703126	1.36743	2.99712e-07	1.16864e-06
gene-LOC115705036	XP_030488133.2	1	uncharacterized LOC115705036	AT2G24395.1	65.98	chaperone protein dnaJ-like protein		8.61791	12.3636	10.7024	4.29326	4.05327	0.545737	0.0742783	0.361861	-1.03562	0.00713151	0.0203919	0.305939	0.424999	0.920632	-1.08013	0.0140613	0.0266894
gene-LOC115703767	XP_030486860.2	1	cathecol O-methyltransferase 1	AT5G54160.1	53.68	O-methyltransferase 1		0	0.0476552	0.130216	0.156971	0.614284	0	1	1	0	1	1	0	1	1	0	1	1
gene-LOC115706440	XP_030489951.2	1	cathecol O-methyltransferase 1	AT5G54160.1	52.45	O-methyltransferase 1		0.025159	0.227803	0.237827	0.165666	0.366136	0	1	1	0	1	1	0	1	1	0	1	1
gene-LOC115705167	XP_060962644.1	1	glycine-rich RNA-binding protein-like	AT2G21660.2	80.39	cold%2C circadian rhythm%2C and rna binding 2		5151.14	5019.7	5295.1	3398.2	2684.68	-0.035563	0.804884	0.957429	-0.698683	5.68021e-08	4.83967e-07	0.0182765	0.923181	0.997387	-0.945016	1.06868e-08	4.91923e-08
gene-LOC115706441	XP_030489952.2	1	cathecol O-methyltransferase 1	AT5G54160.1	51.3	O-methyltransferase 1		0.0270875	0.24299	0.250858	0.17898	0.151264	0	1	1	0	1	1	0	1	1	0	1	1
gene-LOC133032644	XP_060962725.1	1	uncharacterized mitochondrial protein AtMg00860-like					0.101845	0	0	0	0	0	1	1	0	1	1	0	1	1	0	1	1
gene-LOC133032694	XP_060962828.1	1	uncharacterized mitochondrial protein AtMg00810-like	AT4G23160.3	31.4	cysteine-rich RECEPTOR-like kinase;start_range=.,12131325		0	0	0	0	0	0	1	1	0	1	1	0	1	1	0	1	1
gene-LOC115706442	XP_030489954.1	1	large ribosomal subunit protein eL14y	AT4G27090.1	83.85	Ribosomal protein L14		1048.83	1029.76	1209.37	862.299	743.476	-0.029753	0.832159	0.964531	-0.313489	0.0156961	0.0402355	0.195993	0.333146	0.870443	-0.506015	0.00286617	0.00625043
gene-LOC115706437	XP_030489948.2	1	cathecol O-methyltransferase 1-like	AT5G54160.1	53.24	O-methyltransferase 1		2.38007	2.61172	1.65891	3.80427	2.12416	0.14088	0.741494	0.941775	0.655141	0.101324	0.188645	-0.51189	0.324563	0.867113	-0.181166	0.720986	0.785971
gene-LOC133032706	XP_060962873.1	1	uncharacterized LOC133032706	AT5G28235.1	24.52	Ulp1 protease family protein;start_range=.,10201271		0	0	0.0261193	0	0	0	1	1	0	1	1	0	1	1	0	1	1
gene-LOC115703695	XP_030486791.2	1	cathecol O-methyltransferase 1	AT5G54160.1	53.1	O-methyltransferase 1		8.30641	5.45153	4.15647	2.61807	1.55761	-0.611445	0.0285517	0.200345	-1.69312	9.81166e-08	8.04602e-07	-1.00486	0.00199791	0.0431697	-2.42885	1.13329e-10	6.32809e-10
gene-LOC133032710	XP_060962902.1	1	uncharacterized mitochondrial protein AtMg00810-like	AT4G23160.3	48.23	cysteine-rich RECEPTOR-like kinase;start_range=.,12131325		0	0	0	0	0	0	1	1	0	1	1	0	1	1	0	1	1
gene-LOC115704986	XP_060968488.1	1	cathecol O-methyltransferase 1-like	AT5G54160.1	53.71	O-methyltransferase 1		0.968142	0.693872	0.964993	0.789005	0.327031	-0.478275	0.528191	0.866229	-0.281978	0.703658	0.80207	0.031983	0.964775	0.999246	0	1	1
gene-LOC133036025	XP_060968476.1	1	cathecol O-methyltransferase 1-like	AT5G54160.1	54.29	O-methyltransferase 1		3.52229	4.26072	5.47302	9.84351	5.61093	0.276348	0.536295	0.870495	1.4698	0.0433647	0.0948145	0.641562	0.155348	0.6898	0.667696	0.147073	0.213147
gene-LOC133036030	XP_060968484.1	1	protein CURVATURE THYLAKOID 1B, chloroplastic	AT2G46820.2	62.2	photosystem I P subunit		252.834	315.442	240.397	75.6871	68.2576	0.31391	0.072298	0.355621	-1.7644	1.3701e-31	8.8912e-30	-0.0819815	0.765935	0.991551	-1.90158	4.17284e-23	5.27913e-22
gene-LOC133036043	XP_060968500.1	1	transcription factor bHLH67-like	AT2G46810.3	40.77	basic helix-loop-helix (bHLH) DNA-binding superfamily protein		25.5252	31.9969	24.0432	43.0676	22.4032	0.320776	0.0660003	0.337726	0.732567	2.35694e-06	1.53646e-05	-0.0939391	0.6736	0.9793	-0.201028	0.319987	0.411225
gene-LOC115703609	XP_030486706.2	1	metal tolerance protein A1	AT2G46800.5	68.64	zinc transporter		1.47247	2.41219	1.9119	5.50526	6.5978	0.671449	0.145248	0.522891	1.80597	2.75999e-06	1.77839e-05	0.148174	0.78421	0.992996	2.11335	1.53504e-07	6.24591e-07
gene-LOC115708238	XP_030492316.2	1	NDR1/HIN1-like protein 12	AT4G01410.1	50.45	Late embryogenesis abundant (LEA) hydroxyproline-rich glycoprotein family		8.90205	23.3264	22.4841	19.1916	21.7518	1.38353	1.7214e-09	1.56163e-07	1.08036	2.21704e-06	1.45074e-05	1.32542	9.28364e-07	6.06471e-05	1.2771	7.81987e-07	2.90106e-06
gene-LOC115705125	XP_030488224.2	1	two-component response regulator-like PRR95	AT5G24470.1	58.17	two-component response regulator-like protein;start_range=.,8356204		21.3481	6.55599	6.83491	9.70486	12.2353	-1.72153	2.53197e-20	1.21411e-17	-1.17007	6.39658e-13	1.04031e-11	-1.66588	7.10886e-12	1.68099e-09	-0.831127	0.000284207	0.00074342
gene-LOC115704693	XP_030487753.2	1	28 kDa ribonucleoprotein, chloroplastic	AT1G01080.1	59	RNA-binding (RRM/RBD/RNP motifs) family protein		18.9438	22.2419	21.5192	10.9582	7.71042	0.226758	0.276648	0.697608	-0.813923	0.000407608	0.00165245	0.174515	0.496592	0.946081	-1.3099	3.88124e-06	1.32868e-05
gene-LOC115705456	XP_030488654.2	1	conserved oligomeric Golgi complex subunit 4	AT4G01395.1	81.81	conserved oligomeric Golgi complex subunit 4		22.2997	18.1177	19.169	18.6439	29.0913	-0.307667	0.0611117	0.324364	-0.281512	0.0621691	0.127197	-0.229774	0.295246	0.845758	0.368054	0.0462746	0.0775722
gene-LOC115708323	XP_030492424.2	1	pyruvate dehydrogenase E1 component subunit alpha-3, chloroplastic	AT1G01090.1	83.02	pyruvate dehydrogenase E1 alpha		234.737	255.097	241.917	155.233	172.222	0.111427	0.446482	0.824119	-0.621546	5.06654e-08	4.35551e-07	0.0313298	0.893911	0.996876	-0.462961	0.0108457	0.0210741
gene-LOC115703640	XP_030486737.2	1	uncharacterized LOC115703640	AT4G00800.1	56.75	transducin family protein / WD-40 repeat family protein		8.66979	8.18322	7.79843	10.4607	8.13266	-0.0923932	0.623259	0.905157	0.249091	0.0996173	0.186325	-0.164429	0.475217	0.942294	-0.108445	0.577468	0.661733
gene-LOC115704971	XP_030488052.2	1	granule-bound starch synthase 1, chloroplastic/amyloplastic-like	AT1G32900.1	69.82	UDP-Glycosyltransferase superfamily protein		20.3698	3.92913	3.6837	2.54262	1.34978	-2.37839	1.2794e-23	9.33569e-21	-3.02806	7.43555e-36	5.86084e-34	-2.4792	2.31985e-19	2.59653e-16	-3.92229	9.27835e-39	2.16318e-37
gene-LOC115705054	XP_030488155.2	1	large ribosomal subunit protein P1	AT5G24510.1	55.26	60S acidic ribosomal protein family		802.953	814.835	957.404	667.59	812.683	0.0166699	0.901844	0.980751	-0.297578	0.0129863	0.0342452	0.24394	0.258629	0.818809	0.00584464	0.972027	0.980218
gene-LOC133029142	XP_060957602.1	1	uncharacterized LOC133029142	AT5G45570.2	29.66	Ulp1 protease family protein;start_range=.,18472301		0	0	0	0	0	0	1	1	0	1	1	0	1	1	0	1	1
gene-LOC133032737	XP_060963008.1	1	uncharacterized LOC133032737	AT1G06740.1	27.47	MuDR family transposase		0	0	0.0582425	0	0	0	1	1	0	1	1	0	1	1	0	1	1
gene-LOC133029143	XP_060957606.1	1	uncharacterized LOC133029143					0	0	0	0	0	0	1	1	0	1	1	0	1	1	0	1	1
gene-LOC115705573	XP_030488800.1	1	uncharacterized LOC115705573	AT2G46780.2	59.85	RNA-binding (RRM/RBD/RNP motifs) family protein		42.6062	42.0821	35.825	65.5658	36.3552	-0.0593717	0.764277	0.94768	0.602181	0.000843516	0.00314964	-0.271177	0.270815	0.830147	-0.26955	0.231372	0.312771
gene-LOC115706232	XP_030489670.1	1	uncharacterized LOC115706232	AT2G46780.2	61.39	RNA-binding (RRM/RBD/RNP motifs) family protein		10.8683	7.34071	7.27585	20.6609	5.76912	-0.57452	0.0244483	0.180603	0.899755	6.58336e-05	0.000322448	-0.591064	0.0542282	0.419334	-0.930897	0.00127601	0.00295765
gene-LOC133032754	XP_060963065.1	1	uncharacterized LOC133032754	AT4G29090.1	33.87	Ribonuclease H-like superfamily protein;start_range=.,14333528		0	0	0	0	0.0413512	0	1	1	0	1	1	0	1	1	0	1	1
gene-LOC115704165	XP_060963104.1	1	uncharacterized LOC115704165	AT4G09660.1	38.98	zinc finger MYM-type-like protein;start_range=.,6104446		0	0	0	0	0	0	1	1	0	1	1	0	1	1	0	1	1
gene-LOC115704865	XP_030487934.2	1	uncharacterized LOC115704865	AT3G61920.1	46.4	UvrABC system protein C		3.66718	3.52185	3.20621	6.10291	5.48559	-0.0721727	0.874261	0.975191	0.710356	0.0832304	0.160959	-0.194225	0.715039	0.984235	0.574617	0.208408	0.286276
gene-LOC115708111	XP_030492166.2	1	NAC domain-containing protein 43-like	AT2G46770.1	53.86	NAC (No Apical Meristem) domain transcriptional regulator superfamily protein	PK04961.1	0.76104	1.4895	1.73473	1.83418	1.58377	0.955201	0.0841193	0.389657	1.24931	0.0199063	0.0492719	1.1984	0.0356946	0.328191	1.05683	0.0831973	0.130272
gene-LOC133029149	XP_060957611.1	1	uncharacterized LOC133029149					0	0.0779906	0.0462374	0.0810087	0.0441516	0	1	1	0	1	1	0	1	1	0	1	1
gene-LOC133032893	XP_060963362.1	1	uncharacterized LOC133032893					0	0	0	0	0	0	1	1	0	1	1	0	1	1	0	1	1
gene-LOC115707470	XP_060962221.1	1	uncharacterized protein At5g08430	AT5G63700.1	41.67	zinc ion binding / DNA binding protein		3.19416	2.10308	2.45198	4.34511	4.37338	-0.600665	0.0786767	0.374602	0.475637	0.1056	0.194834	-0.326967	0.411697	0.914616	0.502188	0.136727	0.200664
gene-LOC133032939	XP_060963430.1	1	uncharacterized LOC133032939					0	0	0	0	0	0	1	1	0	1	1	0	1	1	0	1	1
gene-LOC133032987	XP_060963485.1	1	uncharacterized LOC133032987					0	0	0	0	0	0	1	1	0	1	1	0	1	1	0	1	1
gene-LOC115707224	XP_030490968.2	1	protein IQ-DOMAIN 17	AT4G00820.1	58.29	IQ-domain 17		25.7571	23.7801	27.2347	32.85	11.2759	-0.122604	0.480578	0.843131	0.326095	0.0329121	0.0754789	0.0692068	0.751075	0.990009	-1.2073	5.07417e-09	2.41494e-08
gene-LOC133029150	XP_060957613.1	1	uncharacterized LOC133029150	AT3G42860.1	60.61	zinc knuckle (CCHC-type) family protein		0	0	0	0	0	0	1	1	0	1	1	0	1	1	0	1	1
gene-LOC133033107	XP_060963710.1	1	uncharacterized LOC133033107	AT1G06740.1	26.95	MuDR family transposase		0	0	0	0	0	0	1	1	0	1	1	0	1	1	0	1	1
gene-LOC115704776	XP_030487841.2	1	probable L-gulonolactone oxidase 6	AT2G46760.1	67.7	D-arabinono-1%2C4-lactone oxidase family protein		1.87764	2.55792	2.72138	1.42756	1.11545	0.43252	0.279124	0.700649	-0.415763	0.36386	0.504413	0.518659	0.224551	0.788369	-0.776709	0.137708	0.201922
gene-LOC133029151	XP_060957624.1	1	uncharacterized LOC133029151	AT4G15880.1	32	Cysteine proteinases superfamily protein		0	0	0	0	0	0	1	1	0	1	1	0	1	1	0	1	1
gene-LOC115704717	XP_030487775.2	1	probable L-gulonolactone oxidase 6	AT2G46760.1	65.49	D-arabinono-1%2C4-lactone oxidase family protein		0	0.0175121	0.0209226	0.0146949	0.0997872	0	1	1	0	1	1	0	1	1	0	1	1
gene-LOC133033189	XP_060963830.1	1	L-gulonolactone oxidase 5-like	AT2G46740.1	60.29	D-arabinono-1%2C4-lactone oxidase family protein		0	0	0	0	0	0	1	1	0	1	1	0	1	1	0	1	1
gene-LOC115705069	XP_060964005.1	1	probable L-gulonolactone oxidase 6	AT2G46760.1	62.61	D-arabinono-1%2C4-lactone oxidase family protein		0	0	0.0195725	0.0685487	0.688638	0	1	1	0	1	1	0	1	1	0	1	1
gene-LOC115705556	XP_030488776.1	1	heterogeneous nuclear ribonucleoprotein Q	AT4G00830.6	69.4	RNA-binding (RRM/RBD/RNP motifs) family protein		36.3833	36.336	39.182	39.1361	35.5357	-0.00925588	0.950965	0.989526	0.0805742	0.552258	0.679824	0.0888736	0.65894	0.978814	-0.0516383	0.76999	0.825196
gene-LOC115708334	XP_030492437.2	1	uncharacterized LOC115708334	AT2G46735.1	31.28	death domain associated protein		24.5812	18.3325	16.0199	11.7488	9.80297	-0.426147	0.133331	0.502062	-1.08896	9.18166e-05	0.000435542	-0.623841	0.0449966	0.379051	-1.33488	3.34241e-05	0.000100088
gene-LOC115706065	XP_030489441.2	1	3-ketoacyl-CoA synthase 1	AT1G01120.1	74.14	3-ketoacyl-CoA synthase 1		28.5176	18.392	15.0836	20.7712	26.311	-0.644439	0.00447381	0.0543299	-0.485041	0.0237504	0.0572038	-0.933512	0.000896775	0.0229862	-0.134424	0.59856	0.680559
gene-LOC133032343	XP_060962243.1	1	uncharacterized LOC133032343					0	0.0637855	0	0.0517305	0.0350941	0	1	1	0	1	1	0	1	1	0	1	1
gene-LOC133033341	XP_060964048.1	1	uncharacterized LOC133033341					0	0	0	0	0	0	1	1	0	1	1	0	1	1	0	1	1
gene-LOC133029156	XP_060957628.1	1	uncharacterized LOC133029156					0	0	0	0	0	0	1	1	0	1	1	0	1	1	0	1	1
gene-LOC133033384	XP_060964100.1	1	uncharacterized LOC133033384	AT3G05850.1	32.15	MuDR family transposase		0.0257772	0	0	0	0	0	1	1	0	1	1	0	1	1	0	1	1
gene-LOC115708210	XP_030492282.1	1	uncharacterized LOC115708210					0	0	0	0	0	0	1	1	0	1	1	0	1	1	0	1	1
gene-LOC115704173	XP_060962259.1	1	uncharacterized LOC115704173	AT2G06420.1	27.59	En/Spm-like transposon%2C putative (DUF1985)		0	0	0	0	0	0	1	1	0	1	1	0	1	1	0	1	1
gene-LOC115705435	XP_030488631.2	1	CBL-interacting serine/threonine-protein kinase 9	AT1G01140.1	77.7	CBL-interacting protein kinase 9		27.2725	30.5945	27.0051	42.8379	31.1899	0.158504	0.359068	0.768546	0.628114	1.82099e-05	0.000100717	-0.0239715	0.911488	0.997278	0.179907	0.355486	0.447869
gene-LOC133029157	XP_060957630.1	1	uncharacterized LOC133029157					0	0	0	0	0	0	1	1	0	1	1	0	1	1	0	1	1
gene-LOC115707764	XP_030491680.2	1	probable protein S-acyltransferase 12	AT4G00840.1	60.26	DHHC-type zinc finger family protein		17.7559	17.8663	17.9482	15.9315	10.7966	-0.000224024	0.999086	0.999727	-0.186394	0.328982	0.46871	0.00169461	0.994365	0.999496	-0.731788	0.00246291	0.00543577
gene-LOC133029028	XP_060962269.1	1	uncharacterized LOC133029028	AT1G58025.5	60.23	DNA-binding bromodomain-containing protein		0	0	0	0	0	0	1	1	0	1	1	0	1	1	0	1	1
gene-LOC133032368	XP_060962272.1	1	uncharacterized LOC133032368	AT1G06740.1	26.48	MuDR family transposase		0	0	0	0	0.0114871	0	1	1	0	1	1	0	1	1	0	1	1
gene-LOC115717794	XP_060964169.1	1	uncharacterized LOC115717794	AT4G15880.1	28.21	Cysteine proteinases superfamily protein		0	0	0	0	0	0	1	1	0	1	1	0	1	1	0	1	1
gene-LOC115717793	XP_060962279.1	1	uncharacterized LOC115717793					0	0	0	0	0	0	1	1	0	1	1	0	1	1	0	1	1
gene-LOC133032372	XP_060962276.1	1	uncharacterized LOC133032372	AT1G31150.2	26.73	K-box region protein (DUF1985)		0	0	0	0	0	0	1	1	0	1	1	0	1	1	0	1	1
gene-LOC115708126	XP_030492185.2	1	transcription factor MYC2	AT4G00870.1	37.27	basic helix-loop-helix (bHLH) DNA-binding superfamily protein	PK23618.1	29.9027	19.7398	32.4015	17.4054	7.36726	-0.607005	0.000389486	0.00829536	-0.806896	6.02421e-07	4.3474e-06	0.104439	0.623699	0.974261	-2.03708	5.54635e-20	5.93373e-19
gene-LOC133033462	XP_060964172.1	1	uncharacterized LOC133033462					0	0	0	0	0	0	1	1	0	1	1	0	1	1	0	1	1
gene-LOC133033464	XP_060964179.1	1	uncharacterized LOC133033464					0	0	0	0	0	0	1	1	0	1	1	0	1	1	0	1	1
gene-LOC115705523	XP_030488727.2	1	rho GTPase-activating protein 5	AT2G46710.1	50.99	Rho GTPase activating protein with PAK-box/P21-Rho-binding domain-containing protein		30.3116	29.7905	21.9545	59.3655	28.0064	-0.0310857	0.866911	0.973832	0.948324	5.70647e-09	5.62886e-08	-0.473692	0.0527561	0.41374	-0.127798	0.543407	0.631612
gene-LOC115706346	XP_030489826.2	1	CDPK-related kinase 3	AT2G46700.1	74.01	CDPK-related kinase 3		6.73788	6.38482	7.66641	11.5708	58.1063	-0.0838279	0.704951	0.930118	0.760065	8.35221e-05	0.000399582	0.178836	0.487687	0.943183	3.09488	3.48448e-50	1.12709e-48
gene-LOC115704804	XP_030487870.1	1	auxin-responsive protein SAUR32-like	AT2G46690.1	65.38	SAUR-like auxin-responsive protein family		8.59692	8.51441	4.55727	8.36266	69.9598	-0.00566065	0.988255	0.998217	-0.0709164	0.854231	0.909837	-0.921019	0.0429115	0.368787	3.01956	4.53008e-26	6.59028e-25
gene-LOC133032389	XP_060962300.1	1	uncharacterized LOC133032389					0.0211284	0	0	0	0.0422616	0	1	1	0	1	1	0	1	1	0	1	1
gene-LOC115706074	XP_030489450.2	1	homeobox-leucine zipper protein ATHB-12	AT2G46680.1	48.94	homeobox 7	PK15571.1	0.36126	1.64553	2.29756	13.5563	3.90336	2.16393	0.001522	0.0243813	5.19872	2.14496e-32	1.45201e-30	2.65038	5.2075e-05	0.00210672	3.41078	7.63572e-09	3.5697e-08
gene-LOC115703557	XP_030486648.2	1	uncharacterized membrane protein At1g16860	AT1G16860.1	45	Ubiquitin-specific protease family C19-related protein		15.5281	19.1672	18.5714	19.6688	44.6174	0.296181	0.139136	0.514116	0.315259	0.102544	0.190499	0.248351	0.358298	0.882291	1.50818	2.44703e-13	1.69676e-12
gene-LOC133032401	XP_060962316.1	1	cytochrome P450 78A3-like	AT2G46660.1	68.35	cytochrome P450%2C family 78%2C subfamily A%2C polypeptide 6		0.505657	0.820036	0.597867	2.14464	2.4046	0.6688	0.320486	0.740388	2.05066	8.53044e-05	0.000407225	0.214003	0.777224	0.992834	2.21637	7.39637e-05	0.000210394
gene-LOC133033466	XP_060964189.1	1	uncharacterized LOC133033466	AT4G29090.1	28.34	Ribonuclease H-like superfamily protein;start_range=.,14333528		0	0	0	0	0	0	1	1	0	1	1	0	1	1	0	1	1
gene-LOC133033467	XP_060964191.1	1	uncharacterized LOC133033467	AT2G41590.1	21.08	Ta11-like non-LTR retrotransposon		0	0	0	0	0	0	1	1	0	1	1	0	1	1	0	1	1
gene-LOC115706225	XP_030489663.2	1	cytochrome P450 78A3	AT2G46660.1	68.6	cytochrome P450%2C family 78%2C subfamily A%2C polypeptide 6		17.1577	22.8205	23.2371	142.774	113.561	0.403256	0.0204572	0.159394	3.03281	5.61099e-92	3.5873e-89	0.427594	0.0544025	0.419552	2.71024	5.39728e-42	1.39213e-40
gene-LOC115720510	XP_060962329.1	1	pentatricopeptide repeat-containing protein At5g64320, mitochondrial-like	AT5G64320.1	25	Pentatricopeptide repeat (PPR) superfamily protein		0.106573	0.0494101	0	0	0.169391	0	1	1	0	1	1	0	1	1	0	1	1
gene-LOC115708188	XP_030492254.1	1	cytochrome b5	AT5G53560.1	54.55	cytochrome B5 isoform E		3.61925	5.19348	5.5961	37.3567	168.66	0.502578	0.325158	0.744633	3.33654	1.7781e-26	8.36339e-25	0.51756	0.34707	0.876254	5.60564	2.37995e-84	1.8576e-82
gene-LOC115704264	XP_060962325.1	1	protein TILLER ANGLE CONTROL 1	AT2G46640.4	29.31	NAD-dependent protein deacetylase HST1-like protein		2.79127	2.34049	1.99708	1.34671	0.787793	-0.265656	0.523528	0.864074	-1.08264	0.0263935	0.0625745	-0.509662	0.261128	0.823256	-1.87161	0.00103409	0.00244296
gene-LOC115705620	XP_030488868.2	1	uncharacterized LOC115705620	AT2G46630.1	47.22	serine/arginine repetitive matrix protein		15.5423	20.2681	19.2631	5.73323	5.86224	0.373092	0.0523883	0.296237	-1.46362	1.03564e-12	1.64162e-11	0.296368	0.23993	0.805385	-1.42477	2.33031e-07	9.23634e-07
gene-LOC115707917	XP_030491879.2	1	uncharacterized LOC115707917	AT3G61870.1	78.76	plant/protein		91.4316	134.07	107.048	35.6876	33.4723	0.545063	0.00045355	0.00929418	-1.38418	4.03207e-19	1.14665e-17	0.215343	0.44609	0.933164	-1.46286	2.88488e-15	2.30894e-14
gene-LOC115705461	XP_030488657.2	1	AAA-ATPase At2g46620	AT2G46620.1	66.19	P-loop containing nucleoside triphosphate hydrolases superfamily protein		4.28696	4.48943	3.99779	7.98623	27.129	0.0572114	0.832844	0.964531	0.876456	0.000214017	0.000927531	-0.110008	0.725323	0.985213	2.65045	1.77858e-29	2.92123e-28
gene-LOC115707121	XP_030490839.1	1	ras-related protein RABA3	AT1G01200.1	71.31	RAB GTPase homolog A3		37.5678	36.5095	38.7636	29.7374	12.3281	-0.0473742	0.789143	0.954121	-0.363996	0.0286199	0.0669065	0.033883	0.892849	0.996876	-1.62117	2.95111e-13	2.0345e-12
gene-LOC133032433	XP_060962357.1	1	uncharacterized LOC133032433					0	0	0	0	0	0	1	1	0	1	1	0	1	1	0	1	1
gene-LOC133033481	XP_060964225.1	1	uncharacterized LOC133033481	AT1G06740.1	22.22	MuDR family transposase		0	0	0	0	0	0	1	1	0	1	1	0	1	1	0	1	1
gene-LOC133033483	XP_060964230.1	1	uncharacterized LOC133033483	AT3G05850.1	28.8	MuDR family transposase		0	0	0	0	0	0	1	1	0	1	1	0	1	1	0	1	1
gene-LOC115707930	XP_060962372.1	1	ATP synthase delta chain, chloroplastic-like	AT4G09650.1	30.82	F-type H+-transporting ATPase subunit delta		66.8806	49.7489	47.5603	30.7984	20.5002	-0.432718	0.0108465	0.103927	-1.14236	1.26725e-12	1.97966e-11	-0.500338	0.0207541	0.233696	-1.71765	8.43778e-17	7.49506e-16
gene-LOC133033488	XP_060964249.1	1	uncharacterized LOC133033488	AT2G34320.1	27.18	Polynucleotidyl transferase%2C ribonuclease H-like superfamily protein;start_range=.,14484959		0	0	0	0	0	0	1	1	0	1	1	0	1	1	0	1	1
gene-LOC115722620	XP_030507729.2	1	uncharacterized LOC115722620	AT4G29090.1	28.35	Ribonuclease H-like superfamily protein;start_range=.,14333528		0	0	0.00835365	0	0.0181226	0	1	1	0	1	1	0	1	1	0	1	1
gene-LOC115722621	XP_060964260.1	1	uncharacterized LOC115722621	AT3G31430.1	22.51	zinc knuckle (CCHC-type) family protein;start_range=.,12795861		0	0.030995	0	0	0	0	1	1	0	1	1	0	1	1	0	1	1
gene-LOC115705529	XP_030488739.2	1	U-box domain-containing protein 43	AT1G76390.2	28.39	ARM repeat superfamily protein		7.58934	6.79938	6.70488	8.38912	4.26862	-0.169536	0.364431	0.773024	0.12332	0.471465	0.609178	-0.193008	0.412628	0.914616	-0.845394	0.000260088	0.000684418
gene-LOC115705477	XP_030488674.2	1	pentatricopeptide repeat-containing protein At5g08510	AT5G08510.1	55.35	Pentatricopeptide repeat (PPR) superfamily protein		0.981112	0.92171	1.31053	1.15139	1.30849	-0.0828222	0.879632	0.976004	0.206586	0.700841	0.800119	0.41233	0.446245	0.933164	0.407531	0.482118	0.573639
gene-LOC115705476	XP_030488673.2	1	calcium-transporting ATPase, endoplasmic reticulum-type	AT4G00900.2	79.18	ER-type Ca2+-ATPase 2		8.2348	12.6002	10.2556	12.5654	8.35196	0.604627	0.00194993	0.0294296	0.587171	0.00121576	0.00434412	0.305313	0.241574	0.808087	0.00432005	0.985391	0.989193
gene-LOC115705478	XP_030488675.1	1	serine/arginine-rich splicing factor RS31	AT3G61860.1	72.24	RNA-binding (RRM/RBD/RNP motifs) family protein		61.9153	54.6967	58.7553	48.9108	63.1305	-0.186592	0.259142	0.678288	-0.369057	0.0175323	0.0441748	-0.0866548	0.70256	0.98024	0.0129721	0.945269	0.96079
gene-LOC115705479	XP_030488678.2	1	calcium-binding protein KIC	AT2G46600.1	72.27	Calcium-binding EF-hand family protein		16.0337	23.4047	21.7563	35.489	28.0879	0.535911	0.0872977	0.398309	1.09765	0.000116151	0.000536955	0.421792	0.248538	0.812267	0.792822	0.0208596	0.0380136
gene-LOC115706949	XP_030490592.1	1	protein yippee-like At4g27745	AT4G27745.4	69.52	Yippee family putative zinc-binding protein		0	0	0	0.0414444	2.40132	0	1	1	0	1	1	0	1	1	7.04245	3.51262e-05	0.00010487
gene-LOC115706052	XP_060962411.1	1	uncharacterized LOC115706052	AT4G07950.1	56.36	DNA-directed RNA polymerase%2C subunit M%2C archaeal		6.80617	5.5655	7.49319	4.52489	9.87739	-0.364152	0.360119	0.770214	-0.699204	0.101536	0.188951	0.100219	0.81679	0.995721	0.409041	0.34712	0.439332
gene-LOC133032482	XP_060962432.1	1	uncharacterized LOC133032482					0.017181	0	0.0201151	0	0.0383178	0	1	1	0	1	1	0	1	1	0	1	1
gene-LOC115706051	XP_030489425.1	1	serine/threonine-protein kinase WNK8	AT3G18750.4	60.95	with no lysine (K) kinase 6		11.3869	9.59397	9.15565	10.657	19.7348	-0.29611	0.139697	0.515282	-0.162811	0.388141	0.52894	-0.352875	0.174189	0.718189	0.712666	0.00156243	0.00356946
gene-LOC133032493	XP_060962443.1	1	bifunctional fucokinase/fucose pyrophosphorylase	AT1G01220.7	73.8	L-fucokinase/GDP-L-fucose pyrophosphorylase		7.17294	6.55447	6.36328	6.58399	3.91674	-0.150771	0.424432	0.810992	-0.146497	0.400808	0.540992	-0.198534	0.442421	0.931051	-0.900575	6.15892e-05	0.000177472
gene-LOC115706911	XP_060962448.1	1	protein LEAD-SENSITIVE 1	AT1G01225.1	80	NC domain-containing protein-like protein		31.0319	39.6802	38.7809	36.8816	33.7104	0.346656	0.0435393	0.265745	0.221455	0.176004	0.291236	0.309305	0.160704	0.69984	0.104621	0.607079	0.688022
gene-LOC115706612	XP_030490182.1	1	uncharacterized LOC115706612	AT1G01230.1	84.71	ORMDL family protein		17.8995	18.0192	17.9367	18.1728	42.1272	0.00462515	0.984087	0.998057	-0.0065402	0.975936	0.985108	-0.00628885	0.980824	0.999496	1.22086	2.90013e-08	1.28297e-07
gene-LOC115708345	XP_030492446.2	1	dof zinc finger protein DOF3.7	AT3G61850.3	38.7	Dof-type zinc finger DNA-binding family protein	PK07031.1	1.58966	1.60201	1.62186	4.68136	0.870098	0.0501432	0.920475	0.982713	1.58414	3.1682e-05	0.000166831	0.0690138	0.895297	0.997103	-0.879077	0.165927	0.235956
gene-LOC115704946	XP_030488023.2	1	transcription factor MYB15	AT5G49330.1	76.72	myb domain protein 111	PK14784.1	0.332275	0.646164	0.506792	8.70965	1.29025	0	1	1	4.7126	1.40185e-16	3.23513e-15	0	1	1	1.98511	0.0422399	0.0715573
gene-LOC133033495	XP_060964265.1	1	uncharacterized LOC133033495					0	0	0	0	0	0	1	1	0	1	1	0	1	1	0	1	1
gene-LOC133033499	XP_060964274.1	1	uncharacterized LOC133033499					0.050553	0	0.112853	0.0423246	0.057288	0	1	1	0	1	1	0	1	1	0	1	1
gene-LOC133029177	XP_060957655.1	1	uncharacterized LOC133029177					0	0	0	0	0.0235945	0	1	1	0	1	1	0	1	1	0	1	1
gene-LOC133033503	XP_060964276.1	1	uncharacterized LOC133033503					0	0	0	0	0	0	1	1	0	1	1	0	1	1	0	1	1
gene-LOC133033504	XP_060964279.1	1	protein FAR-RED IMPAIRED RESPONSE 1-like	AT4G38180.1	27.73	FAR1-related sequence 5		0	0	0	0	0	0	1	1	0	1	1	0	1	1	0	1	1
gene-LOC115706190	XP_060962471.1	1	pyridoxine/pyridoxamine 5'-phosphate oxidase 2	AT2G46580.1	67.68	Pyridoxamine 5'-phosphate oxidase family protein		11.5968	14.8905	14.0034	14.6798	14.2401	0.240925	0.277966	0.69931	0.227825	0.287729	0.42433	0.19831	0.493221	0.944098	0.204362	0.418566	0.511754
gene-LOC115706189	XP_030489609.2	1	laccase-6	AT2G46570.1	65.85	laccase 6;start_range=.,19127369		1.50586	2.04662	2.25547	1.3153	0.199278	0.428299	0.341057	0.756637	-0.220541	0.667097	0.773938	0.556287	0.237993	0.80315	-2.97302	0.161462	0.230667
gene-LOC115705388	XP_060962477.1	1	protein KINESIN LIGHT CHAIN-RELATED 1-like	AT4G10840.1	65.41	Tetratricopeptide repeat (TPR)-like superfamily protein		26.1138	25.6151	26.1978	19.8672	14.9052	-0.0353567	0.822745	0.962546	-0.418465	0.00471324	0.0141952	-0.00592576	0.977639	0.999496	-0.824365	2.11006e-05	6.51415e-05
gene-LOC115705389	XP_030488585.2	1	LOB domain-containing protein 1	AT1G07900.1	47.59	LOB domain-containing protein 1	PK11227.1	1.02102	0.866485	0.645056	0.658458	0.388179	0	1	1	0	1	1	0	1	1	0	1	1
gene-LOC115706064	XP_030489440.2	1	uncharacterized LOC115706064	AT2G46560.2	47.39	transducin family protein / WD-40 repeat family protein		9.20489	8.71971	8.88527	9.3672	8.75452	-0.0896401	0.600456	0.89747	0.00196384	0.989176	0.99303	-0.0615346	0.78133	0.992996	-0.0923654	0.605773	0.686977
gene-LOC115705827	XP_030489131.2	1	uncharacterized LOC115705827	AT2G46550.1	38.99	transmembrane protein		10.9875	15.7181	13.7776	15.1552	9.34768	0.496162	0.0102078	0.0994871	0.440929	0.0181534	0.0455538	0.317467	0.192915	0.74714	-0.244	0.327864	0.41954
gene-LOC115708128	XP_030492186.1	1	uncharacterized LOC115708128	AT2G46540.1	73.02	fiber		124.262	156.663	182.266	109.261	312.066	0.333191	0.0551451	0.305043	-0.222539	0.19095	0.310518	0.54195	0.0204985	0.231687	1.32233	4.61925e-12	2.91886e-11
gene-LOC115708065	XP_030492098.1	1	uncharacterized protein At4g00950	AT4G27810.1	34.21	hypothetical protein		47.1755	57.4455	59.8975	67.0502	27.6568	0.276218	0.0948577	0.417737	0.479222	0.00144774	0.0050681	0.3324	0.127642	0.632917	-0.785318	0.000165463	0.00044755
gene-LOC115706103	XP_030489488.2	1	auxin response factor 18	AT4G23980.2	56.9	auxin response factor 9	PK07332.1	61.1309	70.9568	70.6995	72.5903	38.992	0.206437	0.174802	0.57121	0.224073	0.108653	0.19938	0.198438	0.331495	0.86966	-0.66569	0.00108742	0.00255883
gene-LOC133033507	XP_060964295.1	1	uncharacterized LOC133033507	AT3G09510.1	30.56	Ribonuclease H-like superfamily protein;start_range=.,2921804		0	0	0	0	0	0	1	1	0	1	1	0	1	1	0	1	1
gene-LOC115705641	XP_030488902.2	1	exportin-2	AT2G46520.1	71.87	cellular apoptosis susceptibility protein%2C putative / importin-alpha re-exporter		21.4478	22.4307	23.2296	19.9957	27.6841	0.0564475	0.719872	0.935129	-0.123803	0.383533	0.524567	0.103881	0.625219	0.974261	0.352585	0.0514254	0.0851022
gene-LOC115704832	XP_030487903.2	1	ethylene-responsive transcription factor ERF023	AT1G01250.1	58.14	Integrase-type DNA-binding superfamily protein	PK15554.1	17.7153	19.0095	14.4711	16.6467	13.5926	0.0966302	0.681583	0.925289	-0.113215	0.611367	0.729582	-0.300964	0.368639	0.887886	-0.395296	0.139767	0.204354
gene-LOC115705645	XP_030488907.1	1	transcription factor MTB1	AT1G01260.3	53.95	basic helix-loop-helix (bHLH) DNA-binding superfamily protein	PK29179.1	15.6878	17.2781	16.3234	25.7869	21.8944	0.130935	0.452102	0.826207	0.694295	3.72025e-06	2.32931e-05	0.0457722	0.844279	0.995872	0.46594	0.0163528	0.0305702
gene-LOC115705577	XP_030488807.2	1	protein DEFECTIVE IN MERISTEM SILENCING 3	AT3G49250.1	48.8	defective in meristem silencing 3		31.831	30.7813	32.9266	21.0518	9.69298	-0.0291356	0.878121	0.975923	-0.562686	0.00237066	0.00781708	-0.00240831	0.992318	0.999496	-1.72759	7.19528e-13	4.82697e-12
gene-LOC115705576	XP_030488805.1	1	uncharacterized LOC115705576	AT4G00980.1	41.55	zinc knuckle (CCHC-type) family protein		4.92611	4.59629	4.64654	5.37297	13.0927	-0.108751	0.656722	0.917334	0.104003	0.652774	0.762954	-0.0912919	0.750692	0.990009	1.39571	1.749e-09	8.73866e-09
gene-LOC115707784	XP_030491712.1	1	cytochrome P450 703A2	AT1G01280.1	79.83	cytochrome P450%2C family 703%2C subfamily A%2C polypeptide 2		0.392837	0.302916	0.258329	0.318891	298.36	0	1	1	0	1	1	0	1	1	9.56961	8.74155e-136	2.17956e-133
gene-LOC115704314	XP_030487388.1	1	uncharacterized LOC115704314	AT4G29090.1	45.19	Ribonuclease H-like superfamily protein;start_range=.,14333528		0	0	0	0	0	0	1	1	0	1	1	0	1	1	0	1	1
gene-LOC115704315	XP_030487389.1	1	uncharacterized LOC115704315	AT3G09510.1	25.99	Ribonuclease H-like superfamily protein;start_range=.,2921804		0	0	0	0	0	0	1	1	0	1	1	0	1	1	0	1	1
gene-LOC115703591	XP_030486681.2	1	cyclic pyranopterin monophosphate synthase, mitochondrial	AT1G01290.2	59.77	cofactor of nitrate reductase and xanthine dehydrogenase 3		9.04884	9.2377	7.61165	9.02981	7.27748	-0.00600533	0.984655	0.998057	-0.00781512	0.979455	0.986657	-0.305896	0.391665	0.901958	-0.386569	0.292085	0.381679
gene-LOC115705578	XP_030488808.2	1	aspartyl protease family protein 2	AT1G01300.1	72.75	Eukaryotic aspartyl protease family protein		237.176	226.924	257.793	203.716	91.3347	-0.072535	0.603135	0.898891	-0.244505	0.0462736	0.100009	0.108044	0.592411	0.968773	-1.39296	4.70169e-16	3.97573e-15
gene-LOC115705579	XP_030488809.1	1	UV-stimulated scaffold protein A homolog	AT3G61800.2	52.05	ENTH/VHS protein		8.12598	6.94954	6.66833	9.05354	9.45192	-0.232829	0.290178	0.709405	0.131302	0.51529	0.64814	-0.29626	0.267703	0.828777	0.201527	0.397242	0.49073
gene-LOC115706464	XP_030489981.2	1	E3 ubiquitin-protein ligase SINAT3	AT3G61790.1	79.32	Protein with RING/U-box and TRAF-like domain		6.28324	5.10023	4.93046	14.674	14.4342	-0.305136	0.264096	0.683209	1.20021	4.74834e-08	4.10239e-07	-0.359916	0.246378	0.810846	1.18868	3.11772e-06	1.07986e-05
gene-LOC115704316	XP_030487390.2	1	uncharacterized LOC115704316	AT2G44310.1	42.16	Calcium-binding EF-hand family protein		0	0	0	0	3.47233	0	1	1	0	1	1	0	1	1	0	1	1
gene-LOC115705584	XP_030488816.2	1	uncharacterized LOC115705584	AT3G61780.1	44.81	embryo defective 1703		6.4901	6.54885	6.72559	8.30557	10.5807	0.00426238	0.980566	0.996539	0.333921	0.0347154	0.0787979	0.0402536	0.859848	0.996876	0.688092	0.00159979	0.00364459
gene-LOC115705585	XP_030488817.1	1	phosphatidylinositol 4-kinase gamma 4	AT2G46500.2	64.36	phosphoinositide 4-kinase gamma 4		32.9948	31.7049	29.9637	51.5255	132.339	-0.0679297	0.722101	0.936193	0.61536	0.000391658	0.00159228	-0.153479	0.523346	0.954855	1.98576	1.21816e-20	1.35828e-19
gene-LOC133032607	XP_060962604.1	1	calcineurin B-like protein 4	AT5G24270.4	53.31	Calcium-binding EF-hand family protein		1.27067	2.51738	2.45228	18.3102	9.69207	0.991543	0.0630928	0.329444	3.83281	1.74229e-31	1.12642e-29	0.938195	0.101109	0.569256	2.92811	1.56031e-12	1.02378e-11
gene-LOC133032579	XP_060962554.1	1	uncharacterized LOC133032579	AT3G61770.1	57.24	Acid phosphatase/vanadium-dependent haloperoxidase-related protein		3.19377	3.68377	4.36468	1.34564	1.48619	0.187808	0.636763	0.911244	-1.29408	0.00837274	0.0234856	0.425523	0.30881	0.857385	-1.11773	0.0349623	0.06049
gene-LOC133032582	XP_060962563.1	1	phragmoplastin DRP1B	AT3G61760.1	85.9	DYNAMIN-like 1B		2.50482	1.88137	2.13083	2.59387	19.1786	-0.417122	0.253896	0.6721	0.021726	0.949801	0.969514	-0.245336	0.533797	0.956359	2.9192	1.42211e-27	2.18017e-26
gene-LOC133033528	XP_060964335.1	1	uncharacterized LOC133033528					0	0	0	0	0	0	1	1	0	1	1	0	1	1	0	1	1
gene-LOC115713707	XP_060964339.1	1	uncharacterized LOC115713707					0	0	0	0	0	0	1	1	0	1	1	0	1	1	0	1	1
gene-LOC115708124	XP_030492184.2	1	wax ester synthase/diacylglycerol acyltransferase 11	AT5G53390.1	47.37	O-acyltransferase (WSD1-like) family protein		117.922	67.1033	58.6403	71.5876	15.8962	-0.822029	1.62925e-07	9.59429e-06	-0.746807	9.32494e-08	7.69441e-07	-1.01976	2.59748e-06	0.000145363	-2.90837	1.02059e-54	3.67906e-53
gene-LOC115703623	XP_030486720.2	1	wax ester synthase/diacylglycerol acyltransferase 11	AT5G53390.1	50.81	O-acyltransferase (WSD1-like) family protein		4.72599	3.06348	3.80043	0.903468	4.29643	-0.639346	0.0362319	0.233697	-2.43092	2.58133e-10	3.10298e-09	-0.324669	0.333224	0.870443	-0.158069	0.69891	0.768001
gene-LOC115708251	XP_030492331.1	1	wax ester synthase/diacylglycerol acyltransferase 5	AT3G49200.1	45.84	O-acyltransferase (WSD1-like) family protein		1.34739	0.770854	0.831278	0.498264	21.1504	-0.805331	0.131436	0.498769	-1.4358	0.0148131	0.0382733	-0.720665	0.286489	0.84131	3.95715	1.68836e-45	4.84175e-44
gene-LOC115708250	XP_030492330.2	1	wax ester synthase/diacylglycerol acyltransferase 11	AT3G49200.1	45.75	O-acyltransferase (WSD1-like) family protein		0.831443	0.394889	0.381548	0.0678069	5.39598	-1.06754	0.119009	0.473188	-3.66603	0.000453443	0.00181265	-1.06551	0.188306	0.740444	2.69884	1.88661e-11	1.13652e-10
gene-LOC133029185	XP_060957661.1	1	uncharacterized LOC133029185	AT5G53670.1	24.88	transmembrane protein;start_range=.,21796997		0	0	0	0	0	0	1	1	0	1	1	0	1	1	0	1	1
gene-LOC115711224	XP_060962628.1	1	myb family transcription factor MOF1-like	AT1G14600.1	68.49	Homeodomain-like superfamily protein		0	0.0281776	0	0	0	0	1	1	0	1	1	0	1	1	0	1	1
gene-LOC133032620	XP_060962635.1	1	uncharacterized LOC133032620					0	0	0	0	0	0	1	1	0	1	1	0	1	1	0	1	1
gene-LOC115705098	XP_030488196.2	1	wax ester synthase/diacylglycerol acyltransferase 11	AT3G49200.1	49.39	O-acyltransferase (WSD1-like) family protein		0.938117	1.75314	1.02193	0.249164	0.736444	0.893268	0.0938813	0.415752	-1.94601	0.0215223	0.0526752	0.117354	0.852897	0.996742	-0.385929	0.589533	0.672462
gene-LOC115706852	XP_030490469.2	1	uncharacterized LOC115706852	AT2G45360.1	28.41	ankyrin repeat/KH domain protein (DUF1442)		0.0533253	0.0254997	0.055622	0	0.282213	0	1	1	0	1	1	0	1	1	0	1	1
gene-LOC115705563	XP_030488790.2	1	protein REDUCED CHLOROPLAST COVERAGE 1	AT1G01320.2	61.08	Tetratricopeptide repeat (TPR)-like superfamily protein		16.3466	26.0322	21.5407	9.44936	9.69959	0.661497	0.000712454	0.0134501	-0.813165	3.31005e-09	3.37695e-08	0.386094	0.16767	0.709518	-0.768005	1.63105e-05	5.13515e-05
gene-LOC115705888	XP_030489203.2	1	histone-lysine N-methyltransferase ATX3	AT3G61740.2	55.13	SET domain protein 14		5.22556	5.36364	5.75582	4.43468	19.1354	0.0291068	0.90263	0.980751	-0.259873	0.27476	0.410038	0.128828	0.643933	0.976293	1.85814	5.35619e-16	4.50583e-15
gene-LOC115705889	XP_030489204.2	1	probable F-box protein At3g61730	AT3G61730.1	54.97	reduced male fertility;start_range=.,22848427		0.07666	0.075436	0	0.0211049	37.3291	0	1	1	0	1	1	0	1	1	8.91543	4.58681e-09	2.19229e-08
gene-LOC115705567	XP_030488793.2	1	putative RING-H2 finger protein ATL21A	AT2G46495.1	49.72	RING/U-box superfamily protein		0.0402553	0.0789775	0.224664	0.297933	1.30441	0	1	1	0	1	1	0	1	1	5.00398	0.000126205	0.000347704
gene-LOC115705566	XP_030488792.2	1	uncharacterized LOC115705566	AT4G01000.2	46.33	Ubiquitin-like superfamily protein		61.8064	59.4827	59.2766	72.7018	82.6104	-0.0629223	0.662655	0.919654	0.209965	0.100229	0.187144	-0.0712634	0.72146	0.985213	0.40302	0.0308131	0.0540821
gene-LOC115706458	XP_030489972.2	1	beclin-1-like protein	AT3G61710.1	72.92	AUTOPHAGY 6		13.184	12.1775	13.1809	15.3627	19.8536	-0.121747	0.551173	0.878956	0.196969	0.284654	0.421112	-0.0105627	0.965044	0.999246	0.576115	0.00690263	0.0139595
gene-LOC115707560	XP_030491429.2	1	non-specific lipid-transfer protein A-like	AT2G15325.1	30.25	Bifunctional inhibitor/lipid-transfer protein/seed storage 2S albumin superfamily protein		0	0	0.0970305	0.116	1655.38	0	1	1	0	1	1	0	1	1	16.5364	8.51426e-27	1.27161e-25
gene-LOC115706280	XP_060968602.1	1	cyclic nucleotide-gated ion channel 1	AT5G53130.1	63.52	cyclic nucleotide gated channel 1		6.87535	6.79432	16.3247	14.5572	8.91092	-0.0275092	0.906632	0.981324	1.0567	1.74953e-07	1.37026e-06	1.23498	2.15231e-06	0.000125906	0.354821	0.212547	0.291271
gene-LOC115703607	XP_030486704.2	1	B3 domain-containing protein REM19-like	AT1G49480.3	32.74	related to vernalization1 1	PK02339.2	0	0	0	0	2.72471	0	1	1	0	1	1	0	1	1	8.57755	2.64095e-08	1.1741e-07
gene-LOC133028937	XP_030487733.2	1	B3 domain-containing protein REM19-like	AT1G49480.3	34.26	related to vernalization1 1	PK02339.2	0	0	0	0.147158	4.8933	0	1	1	0	1	1	0	1	1	8.52786	4.36586e-08	1.88358e-07
gene-LOC115706347	XP_030489827.1	1	uncharacterized LOC115706347	AT2G46420.3	72.75	helicase with zinc finger protein		45.7678	35.3968	37.1865	22.648	12.8585	-0.377597	0.0240162	0.178558	-1.03855	1.13106e-11	1.59122e-10	-0.309808	0.198381	0.754899	-1.84516	4.38448e-20	4.72451e-19
gene-LOC133033544	XP_060964365.1	1	uncharacterized LOC133033544	AT5G45570.2	34.57	Ulp1 protease family protein;start_range=.,18472301		0	0	0	0	0	0	1	1	0	1	1	0	1	1	0	1	1
gene-LOC115705528	XP_030488733.1	1	trehalose-phosphate phosphatase A	AT5G51460.4	54.08	Haloacid dehalogenase-like hydrolase (HAD) superfamily protein		0.206455	0.163546	0.129313	0.23409	1.7155	0	1	1	0	1	1	0	1	1	3.10147	0.000228132	0.000605653
gene-LOC115705526	XP_030488732.2	1	DEAD-box ATP-dependent RNA helicase 31	AT5G08610.1	58.22	P-loop containing nucleoside triphosphate hydrolases superfamily protein		29.9738	40.6857	43.7955	21.0716	34.7172	0.432435	0.00372844	0.047684	-0.532153	0.000128814	0.000588094	0.535043	0.0257684	0.267714	0.196012	0.27061	0.358021
gene-LOC115705525	XP_030488731.2	1	uncharacterized LOC115705525	AT3G61690.3	56.35	nucleotidyltransferase		13.1592	11.5905	13.1179	11.764	45.0709	-0.189338	0.269102	0.68878	-0.189256	0.193851	0.314262	-0.0292991	0.89964	0.997212	1.74487	8.55573e-14	6.1437e-13
gene-LOC115704778	XP_030487843.2	1	phospholipase A1 PLIP1, chloroplastic	AT3G61680.3	55.9	alpha/beta-Hydrolases superfamily protein		6.79411	5.44243	4.35084	10.7299	2.86817	-0.329213	0.16533	0.555874	0.635166	0.0024275	0.0079725	-0.656724	0.0240674	0.25704	-1.26128	1.6362e-05	5.14594e-05
gene-LOC115705532	XP_030488746.1	1	abscisic acid receptor PYL9	AT1G01360.1	85.23	regulatory component of ABA receptor 1		68.8852	74.5127	68.5743	80.4772	57.3259	0.107694	0.483335	0.844277	0.199105	0.151058	0.258252	-0.0162017	0.937245	0.997613	-0.278074	0.127134	0.188527
gene-LOC115705611	XP_030488856.2	1	pentatricopeptide repeat-containing protein At4g01030, mitochondrial	AT4G01030.1	55.95	pentatricopeptide (PPR) repeat-containing protein		1.64196	1.826	1.72491	1.75753	1.46829	0.143967	0.620929	0.904488	0.0740923	0.798307	0.870357	0.0558703	0.86562	0.996876	-0.178161	0.605495	0.686748
gene-LOC133033547	XP_060964373.1	1	uncharacterized protein At4g02000-like	AT3G57587.1	23.02	Ta11-like non-LTR retrotransposon;start_range=.,21328263		0	0.092109	0	0	0.0701005	0	1	1	0	1	1	0	1	1	0	1	1
gene-LOC115704304	XP_030487378.2	1	inositol transporter 4-like	AT4G16480.3	67.9	inositol transporter 4		0.0194745	0.0387827	0.0456387	0.0477926	2.13077	0	1	1	0	1	1	0	1	1	6.76497	1.57901e-05	4.98441e-05
gene-LOC115707248	XP_030491003.2	1	protein WHAT'S THIS FACTOR 1 homolog, chloroplastic	AT4G01037.1	62.11	Ubiquitin carboxyl-terminal hydrolase family protein		32.1462	29.3054	31.3429	16.8284	21.0997	-0.139331	0.445819	0.824119	-0.956437	1.17299e-07	9.47946e-07	-0.0442696	0.846927	0.996503	-0.621266	0.00397686	0.00843784
gene-LOC115704303	XP_060964379.1	1	uncharacterized LOC115704303	AT4G01040.1	63.7	Glycosyl hydrolase superfamily protein		57.3006	69.8154	59.0789	34.0001	20.9703	0.277569	0.0680175	0.343633	-0.775313	6.96144e-09	6.74345e-08	0.0337314	0.88487	0.996876	-1.46414	8.38179e-17	7.44901e-16
gene-LOC115707001	XP_030490653.2	1	MYB-like transcription factor ETC3	AT2G46410.1	67.09	Homeodomain-like superfamily protein	PK15950.1	0.278004	0	0.323066	0.714878	0	0	1	1	0	1	1	0	1	1	0	1	1
gene-LOC115707429	XP_030491251.2	1	probable WRKY transcription factor 46	AT2G46400.1	36.31	WRKY DNA-binding protein 46	PK10616.1	9.48989	9.40369	12.3415	14.3773	4.68452	-0.0211616	0.922121	0.983195	0.575493	0.00322804	0.0102056	0.368313	0.145666	0.67364	-1.03082	0.000239441	0.000633616
gene-LOC115704809	XP_030487876.2	1	UDP-glucose flavonoid 3-O-glucosyltransferase 7	AT4G34131.1	51.88	UDP-glucosyl transferase 73B3		0.970781	2.1475	1.84558	4.15812	1.5254	1.14163	0.0159453	0.135085	2.07371	8.54498e-07	5.99364e-06	0.914436	0.100181	0.567263	0.641119	0.267212	0.354256
gene-LOC133033554	XP_060964385.1	1	protein OCTOPUS-like	AT2G38070.1	57.46	LOW protein: UPF0503-like protein%2C putative (DUF740)		0.059036	0	0.061409	0	0	0	1	1	0	1	1	0	1	1	0	1	1
gene-LOC115703582	XP_030486667.2	1	NADPH HC-toxin reductase 1	AT4G27250.1	32.29	NAD(P)-binding Rossmann-fold superfamily protein		2.33235	0.726677	1.29326	2.77058	2.41868	-1.67333	0.00591115	0.0668509	0.234029	0.623119	0.739325	-0.865693	0.153495	0.687289	0.0520546	0.930219	0.949976
gene-LOC115704682	XP_030487740.2	1	NADPH HC-toxin reductase 1	AT2G45400.1	33.82	NAD(P)-binding Rossmann-fold superfamily protein		7.72629	5.66939	5.79601	8.33333	2.40543	-0.457995	0.113567	0.459997	0.0839182	0.756548	0.840111	-0.424295	0.199326	0.756098	-1.68503	8.86913e-06	2.89436e-05
gene-LOC133033555	XP_060964390.1	1	uncharacterized LOC133033555	AT2G34320.1	27.98	Polynucleotidyl transferase%2C ribonuclease H-like superfamily protein;start_range=.,14484959		0	0	0	0	0	0	1	1	0	1	1	0	1	1	0	1	1
gene-LOC115705536	XP_030488749.2	1	hydroquinone glucosyltransferase	AT4G01070.1	61.46	UDP-Glycosyltransferase superfamily protein		14.5761	10.2977	13.7703	17.2909	25.8239	-0.505943	0.0238599	0.177816	0.224237	0.250108	0.381494	-0.0898462	0.730261	0.985376	0.811086	0.000628172	0.00154415
gene-LOC115704076	XP_030487160.2	1	uncharacterized LOC115704076	AT3G05850.1	36.44	MuDR family transposase		0	0	0	0	0	0	1	1	0	1	1	0	1	1	0	1	1
gene-LOC133033562	XP_060964398.1	1	uncharacterized LOC133033562	AT3G05850.1	28.3	MuDR family transposase		0	0	0	0	0	0	1	1	0	1	1	0	1	1	0	1	1
gene-LOC115695827	XP_060964407.1	1	uncharacterized LOC115695827	AT1G31150.1	25.62	K-box region protein (DUF1985)		0	0	0	0	0	0	1	1	0	1	1	0	1	1	0	1	1
gene-LOC115705654	XP_030488913.2	1	protein trichome birefringence-like 23	AT4G11090.1	54.3	TRICHOME BIREFRINGENCE-LIKE 23		12.4354	11.423	8.99188	16.0993	9.21737	-0.131906	0.527481	0.865875	0.344821	0.0725591	0.144133	-0.48129	0.0656092	0.458964	-0.450295	0.0672209	0.10789
gene-LOC115705551	XP_030488769.2	1	uncharacterized LOC115705551	AT3G61670.1	40.73	extra-large G-like protein%2C putative (DUF3133)		7.48766	9.16455	9.24371	11.4504	4.77773	0.283864	0.0660441	0.337726	0.590958	2.04933e-05	0.000112375	0.293704	0.153389	0.687284	-0.6637	0.000679041	0.00165762
gene-LOC115704307	XP_060962728.1	1	uncharacterized LOC115704307	AT3G61660.2	36.24	hypothetical protein;start_range=.,22816152		0	0.100667	0.0739621	0.331387	0.635701	0	1	1	0	1	1	0	1	1	0	1	1
gene-LOC115705838	XP_030489143.2	1	jasmonoyl--L-amino acid synthetase JAR4	AT2G46370.2	65.91	Auxin-responsive GH3 family protein		13.2475	12.1018	12.4045	15.3695	21.4237	-0.135808	0.504275	0.856176	0.191587	0.308584	0.447477	-0.100821	0.692355	0.980067	0.677268	0.0025356	0.0055831
gene-LOC133033569	XP_060964409.1	1	uncharacterized LOC133033569	AT1G31150.1	29.25	K-box region protein (DUF1985)		0	0.0173453	0.0207234	0	0.0790498	0	1	1	0	1	1	0	1	1	0	1	1
gene-LOC133033570	XP_060964412.1	1	uncharacterized LOC133033570	AT1G06740.1	25.78	MuDR family transposase		0	0	0	0	0	0	1	1	0	1	1	0	1	1	0	1	1
gene-LOC133033572	XP_060964417.1	1	putative E3 ubiquitin-protein ligase XBAT31	AT2G28840.2	73.13	hypothetical protein		0	0	0	0	0	0	1	1	0	1	1	0	1	1	0	1	1
gene-LOC133033575	XP_060964428.1	1	uncharacterized LOC133033575	AT3G09510.1	24.66	Ribonuclease H-like superfamily protein;start_range=.,2921804		0	0	0	0	0	0	1	1	0	1	1	0	1	1	0	1	1
gene-LOC115705555	XP_030488775.1	1	mitochondrial adenine nucleotide transporter ADNT1	AT4G01100.1	80.66	adenine nucleotide transporter 1		31.3392	27.4927	30.9264	30.3665	27.8496	-0.196173	0.211383	0.623706	-0.0696639	0.626145	0.741834	-0.0293948	0.889663	0.996876	-0.184803	0.313162	0.403784
gene-LOC115705554	XP_030488773.1	1	pentatricopeptide repeat-containing protein At5g42450, mitochondrial	AT5G42450.1	60.47	Pentatricopeptide repeat (PPR) superfamily protein		0.897324	0.600054	0.704062	0.672486	0.802549	-0.566047	0.358918	0.768546	-0.425974	0.496053	0.630968	-0.343879	0.599011	0.969417	-0.125787	0.854912	0.892341
gene-LOC115699851	XP_060962774.1	1	protein SUPPRESSOR OF PHYA-105 1	AT2G46340.2	47.79	SPA (suppressor of phyA-105) protein family		11.815	7.09842	6.699	4.97248	9.2637	-0.742877	2.86722e-05	0.000927178	-1.27557	8.155e-13	1.30465e-11	-0.815824	0.000384452	0.0112112	-0.3366	0.118807	0.177795
gene-LOC133032675	XP_060962786.1	1	receptor-like kinase LIP1	AT1G64300.2	50.61	Protein kinase family protein		0.110135	0.0131119	0.0424086	0.0212666	0.769648	0	1	1	0	1	1	0	1	1	2.86719	0.00148217	0.00339993
gene-LOC115704349	XP_060962799.1	1	tubulin gamma-1 chain	AT3G61650.1	96.83	gamma-tubulin		23.0642	25.845	26.9573	23.4425	19.6104	0.155156	0.362591	0.772304	-0.00251347	0.98752	0.991945	0.212794	0.329125	0.868393	-0.249024	0.218872	0.298236
gene-LOC115706565	XP_030490114.1	1	arabinogalactan protein 16	AT2G46330.1	72.13	arabinogalactan protein 16		174.235	161.301	157.444	149.204	244.533	-0.113737	0.48659	0.846965	-0.261866	0.0949854	0.179235	-0.158433	0.464263	0.939663	0.48088	0.0105712	0.0205874
gene-LOC115706563	XP_030490113.2	1	mitochondrial carrier protein MTM1	AT4G27940.1	62.85	manganese tracking factor for mitochondrial SOD2		2.17676	2.53644	2.24233	2.63287	54.8937	0.204618	0.601647	0.89787	0.234822	0.557809	0.683822	0.0273742	0.950269	0.997967	4.63065	1.37713e-81	9.96862e-80
gene-LOC115707305	XP_030491078.2	1	uncharacterized LOC115707305					6.21922	3.91559	4.12814	8.58678	3.90621	-0.657206	0.0571057	0.311151	0.4454	0.119243	0.214593	-0.597491	0.173272	0.717795	-0.676329	0.0698882	0.111702
gene-LOC115708241	XP_030492317.2	1	uncharacterized LOC115708241					2.61579	1.80917	2.61182	1.91282	3.20948	-0.540519	0.0607966	0.323204	-0.475224	0.114482	0.207671	-0.0140484	0.964018	0.999246	0.279571	0.336101	0.428102
gene-LOC115706716	XP_030490294.2	1	putative 3,4-dihydroxy-2-butanone kinase	AT3G17770.1	81.14	Dihydroxyacetone kinase		12.7741	15.4354	16.6041	13.8635	29.9548	0.265268	0.141154	0.518512	0.0940038	0.598143	0.718321	0.368604	0.108109	0.590165	1.21518	2.58977e-10	1.39908e-09
gene-LOC115706053	XP_030489427.2	1	homeobox-DDT domain protein RLT3	AT4G12750.1	50.36	Homeodomain-like transcriptional regulator	PK02373.1	9.84872	9.40448	10.7907	9.8681	14.5722	-0.0731996	0.677599	0.924836	-0.0210788	0.900617	0.939647	0.119073	0.584	0.967735	0.550495	0.00393246	0.0083545
gene-LOC115708247	XP_030492326.2	1	uncharacterized LOC115708247	AT3G15080.1	67.39	Polynucleotidyl transferase%2C ribonuclease H-like superfamily protein		15.4172	15.2315	15.7702	20.1395	15.7385	-0.0236577	0.912507	0.982713	0.360238	0.0705241	0.14082	0.0233996	0.932491	0.997607	0.0174156	0.945523	0.960993
gene-LOC115705693	XP_030488956.2	1	uncharacterized LOC115705693	AT5G35970.1	78.81	P-loop containing nucleoside triphosphate hydrolases superfamily protein		25.6595	19.7892	17.8018	14.6153	21.9194	-0.382944	0.0184753	0.148556	-0.83505	3.51876e-09	3.5772e-08	-0.538235	0.0127211	0.17045	-0.243377	0.180099	0.252866
gene-LOC115705708	XP_030488981.2	1	chloride channel protein CLC-c-like	AT5G49890.1	73.71	chloride channel C		20.4083	15.5651	14.5431	34.7197	12.986	-0.40014	0.0262319	0.189681	0.741644	8.36255e-07	5.88961e-06	-0.501563	0.0385093	0.344084	-0.667787	0.00105522	0.00248782
gene-LOC115706927	XP_060962822.1	1	chloride channel protein CLC-c	AT5G49890.1	69.37	chloride channel C		0.381143	1.2145	1.40691	0.657495	0.187939	1.66257	0.00156656	0.0248269	0.769001	0.232969	0.361646	1.8656	0.000585278	0.016135	-0.97172	0.291186	0.380755
gene-LOC115706928	XP_030490564.1	1	membrane-bound O-acyltransferase gup1	AT1G57600.3	67.82	MBOAT (membrane bound O-acyl transferase) family protein		9.81845	9.80412	10.1301	9.7409	11.4626	0.00518404	0.979884	0.996055	0.0384148	0.84869	0.906004	0.0812881	0.753592	0.990708	0.179758	0.432246	0.525332
gene-LOC115705697	XP_030488960.2	1	probable L-type lectin-domain containing receptor kinase S.5	AT5G06740.1	38.38	Concanavalin A-like lectin protein kinase family protein		3.29514	3.64957	4.44108	5.25488	2.6433	0.137152	0.634749	0.909967	0.647277	0.00934596	0.0258417	0.418822	0.163903	0.704427	-0.334615	0.306719	0.397074
gene-LOC115705696	XP_030488959.2	1	chaperone protein ClpD, chloroplastic	AT5G51070.1	67.61	Clp ATPase		3.80369	3.8539	3.23154	6.38393	4.36111	0.0101867	0.96706	0.992408	0.720703	0.000852832	0.00317961	-0.24986	0.472523	0.941081	0.177895	0.548571	0.636337
gene-LOC115705695	XP_030488957.2	1	leucine--tRNA ligase, cytoplasmic	AT1G09620.1	74.43	ATP binding/leucine-tRNA ligases/aminoacyl-tRNA ligase		50.6365	50.3424	51.3084	43.891	32.3554	-0.0161244	0.907139	0.981324	-0.228497	0.0591121	0.122027	0.00831272	0.970874	0.999246	-0.661466	0.000141966	0.000387734
gene-LOC115708237	XP_030492315.2	1	uncharacterized LOC115708237	AT5G07400.1	48.86	forkhead-associated domain-containing protein / FHA domain-containing protein		2.50277	2.12807	2.83957	1.71428	3.46657	-0.246402	0.361685	0.771401	-0.570958	0.0409126	0.0903573	0.168073	0.571792	0.96639	0.450484	0.106625	0.161625
gene-LOC133033579	XP_060964449.1	1	uncharacterized LOC133033579					0	0	0	0.040397	0.0184239	0	1	1	0	1	1	0	1	1	0	1	1
gene-LOC133032667	XP_060962763.1	1	uncharacterized LOC133032667					2.11983	2.76531	2.93119	3.45842	1.77697	0.361631	0.524064	0.86424	0.679447	0.214016	0.338713	0.448419	0.450271	0.93464	-0.280696	0.70047	0.769242
gene-LOC115704750	XP_060962864.1	1	uncharacterized LOC115704750	AT5G07360.3	71.35	Amidase family protein		0.36399	0.177338	0.229813	1.13704	0.251934	0	1	1	1.60784	0.0161947	0.0412685	0	1	1	0	1	1
gene-LOC115704921	XP_060962867.1	1	uncharacterized LOC115704921	AT5G07360.3	70.21	Amidase family protein		0.263962	0.548897	0.49998	2.21755	0.157946	0	1	1	3.20706	2.12475e-07	1.64621e-06	0	1	1	0	1	1
gene-LOC133033580	XP_060964455.1	1	uncharacterized mitochondrial protein AtMg00820-like	AT4G23160.3	35.35	cysteine-rich RECEPTOR-like kinase;start_range=.,12131325		0	0	0	0	0	0	1	1	0	1	1	0	1	1	0	1	1
gene-LOC115705699	XP_030488962.1	1	ribonuclease TUDOR 1	AT5G07350.1	72.64	TUDOR-SN protein 1;start_range=.,2320021		114.24	100.399	97.4079	71.0977	66.8907	-0.195065	0.186966	0.588825	-0.706615	3.06385e-09	3.1425e-08	-0.241394	0.28536	0.840895	-0.789219	0.000266603	0.000700124
gene-LOC115704807	XP_030487874.2	1	uncharacterized LOC115704807	AT5G07330.1	43.31	NFU1 iron-sulfur cluster protein		0.650165	0.25651	0.330355	2.09737	2.26274	0	1	1	1.6595	0.0377321	0.0845446	0	1	1	1.80649	0.0314177	0.0550271
gene-LOC115704447	XP_030487516.2	1	pentatricopeptide repeat-containing protein At5g61800	AT5G61800.1	52	Pentatricopeptide repeat (PPR) superfamily protein		2.21914	1.97621	2.32529	1.91718	2.68729	-0.178977	0.656641	0.917297	-0.230365	0.575447	0.698549	0.0559408	0.895769	0.997212	0.255381	0.547197	0.635112
gene-LOC115705700	XP_030488963.2	1	calcium-dependent mitochondrial ATP-magnesium/phosphate carrier protein 2	AT5G51050.1	79.55	Mitochondrial substrate carrier family protein		6.72029	6.39351	6.17896	10.9659	16.3074	-0.0685497	0.724215	0.936907	0.694284	6.83157e-05	0.000333032	-0.121118	0.614534	0.971325	1.26404	1.93432e-10	1.06193e-09
gene-LOC115705701	XP_030488965.2	1	uncharacterized LOC115705701	AT5G61820.2	53.77	stress up-regulated Nod 19 protein		59.2831	49.5077	54.5163	112.13	39.3919	-0.277405	0.0885886	0.401942	0.900768	2.19475e-11	2.99256e-10	-0.141429	0.510119	0.950665	-0.610671	0.00184868	0.0041651
gene-LOC115705703	XP_030488969.2	1	uncharacterized LOC115705703	AT5G61820.2	52.76	stress up-regulated Nod 19 protein		18.6242	17.9839	17.8261	24.1733	7.65433	-0.0571985	0.754176	0.944819	0.350987	0.0381234	0.0852886	-0.0754559	0.756559	0.990708	-1.29541	3.19264e-08	1.40614e-07
gene-LOC115705647	XP_060962908.1	1	uncharacterized LOC115705647	AT5G61820.2	53.15	stress up-regulated Nod 19 protein		1.23362	3.34063	5.17603	5.36623	2.48339	1.43422	0.000836162	0.015204	2.10705	4.611e-08	3.99173e-07	2.07295	1.16394e-05	0.000553581	0.997153	0.0554654	0.0910992
gene-LOC115708227	XP_030492306.2	1	uncharacterized LOC115708227	AT5G51030.1	69.13	NAD(P)-binding Rossmann-fold superfamily protein		8.29165	8.97812	10.1365	10.8721	6.11205	0.10654	0.654147	0.916465	0.363644	0.128046	0.227259	0.276206	0.319754	0.864168	-0.459766	0.123421	0.183704
gene-LOC115706380	XP_060962913.1	1	serine/threonine-protein kinase TIO	AT1G50240.3	64.5	kinase family with ARM repeat domain-containing protein		7.00583	8.18762	9.21823	5.47151	9.02859	0.214976	0.221688	0.635671	-0.381234	0.0346231	0.0786608	0.383862	0.0903392	0.540715	0.345855	0.102616	0.156302
gene-LOC133032720	XP_060962928.1	1	chromophore lyase CRL, chloroplastic	AT5G51020.1	76.95	crumpled leaf		13.1853	13.946	14.616	15.1154	13.3286	0.0744651	0.742709	0.941785	0.172484	0.439661	0.579037	0.14028	0.605324	0.970504	0.00324731	0.990185	0.992286
gene-LOC133032721	XP_060962931.1	1	uncharacterized LOC133032721	AT5G51010.1	60.71	Rubredoxin-like superfamily protein		75.179	134.594	110.951	46.3289	40.3835	0.833035	5.19989e-08	3.39571e-06	-0.727727	1.02485e-06	7.0707e-06	0.549054	0.0299729	0.295141	-0.910682	2.15873e-06	7.61816e-06
gene-LOC133032709	XP_060962878.1	1	probable beta-1,4-xylosyltransferase IRX10L	AT5G61840.1	89.66	Exostosin family protein		20.3218	21.907	23.648	22.8743	67.0281	0.0995685	0.563005	0.884466	0.145218	0.364091	0.504692	0.205915	0.381125	0.897852	1.70405	6.51477e-15	5.06949e-14
gene-LOC133033584	XP_060964475.1	1	uncharacterized LOC133033584	AT4G29090.1	22.67	Ribonuclease H-like superfamily protein;start_range=.,14333528		0	0	0	0	0	0	1	1	0	1	1	0	1	1	0	1	1
gene-LOC115695615	XP_060962935.1	1	floricaula/leafy homolog	AT5G61850.1	55.87	floral meristem identity control protein LEAFY (LFY);start_range=.,24844295		1.06967	4.90083	7.12547	2.7477	5.1797	2.20757	5.85397e-08	3.76426e-06	1.35786	0.00356213	0.0111213	2.74005	2.16026e-11	4.36971e-09	2.27661	2.24121e-07	8.90927e-07
gene-LOC133032725	XP_060962937.1	1	ethylene-responsive transcription factor ERF113	AT5G61890.1	63.43	Integrase-type DNA-binding superfamily protein		0	0	0	0.0615451	0.501155	0	1	1	0	1	1	0	1	1	0	1	1
gene-LOC115706461	XP_030489976.2	1	protein BONZAI 1	AT5G07300.1	69.44	Calcium-dependent phospholipid-binding Copine family protein		8.35721	7.03218	8.08061	8.45928	9.89664	-0.260801	0.224762	0.638402	-0.0103598	0.959804	0.97563	-0.0669455	0.793508	0.993364	0.237257	0.385064	0.478508
gene-LOC115706658	XP_030490232.2	1	uncharacterized LOC115706658	AT5G50970.1	58.51	transducin family protein / WD-40 repeat family protein		6.95066	9.37442	8.69542	10.2717	7.39104	0.4251	0.0597287	0.319856	0.53925	0.0115945	0.0310715	0.312923	0.252975	0.814146	0.0759529	0.775745	0.829333
gene-LOC115705670	XP_030488926.2	1	protein MEI2-like 1	AT5G61960.3	49.16	MEI2-like protein 1		29.593	32.5427	33.6001	44.0611	41.5714	0.122794	0.419129	0.807976	0.547129	3.83353e-05	0.000198246	0.149976	0.464003	0.939543	0.46982	0.00768402	0.0153972
gene-LOC115705680	XP_030488939.1	1	protein MHF1 homolog	AT5G50930.1	67.48	Histone superfamily protein;start_range=.,20722069		4.43393	5.35149	6.34915	5.10592	21.9281	0.258643	0.502592	0.855651	0.158573	0.690357	0.791823	0.503168	0.28624	0.84131	2.2872	1.44481e-12	9.50778e-12
gene-LOC115705677	XP_030488936.2	1	magnesium protoporphyrin IX methyltransferase, chloroplastic	AT4G25080.5	78.52	magnesium-protoporphyrin IX methyltransferase		114.312	148.451	120.819	54.4107	40.0855	0.368723	0.0281293	0.198526	-1.09728	8.27225e-17	1.95076e-15	0.0681338	0.788352	0.992996	-1.52687	5.38617e-16	4.52612e-15
gene-LOC115705668	XP_060968637.1	1	probable alpha-mannosidase At5g13980	AT5G13980.2	69.19	Glycosyl hydrolase family 38 protein		8.95393	10.1687	8.22504	7.5464	2.18032	0.176936	0.321631	0.741679	-0.267743	0.128439	0.227747	-0.133512	0.562311	0.965903	-2.05587	3.34947e-16	2.8484e-15
gene-LOC115705681	XP_060968644.1	1	ADP-ribosylation factor GTPase-activating protein AGD3	AT5G61980.1	60.1	ARF-GAP domain 1		0.672006	0.793888	0.924543	1.15175	12.2711	0.246309	0.588299	0.89451	0.76071	0.0735711	0.145564	0.461531	0.336107	0.872703	4.18558	2.88383e-49	9.06665e-48
gene-LOC133033585	XP_060964479.1	1	uncharacterized LOC133033585	AT4G29090.1	25.67	Ribonuclease H-like superfamily protein;start_range=.,14333528		0	0	0	0	0.056945	0	1	1	0	1	1	0	1	1	0	1	1
gene-LOC133032729	XP_060962949.1	1	uncharacterized LOC133032729					0	0	0	0	0	0	1	1	0	1	1	0	1	1	0	1	1
gene-LOC133033586	XP_060964484.1	1	uncharacterized LOC133033586					0	0	0	0	0	0	1	1	0	1	1	0	1	1	0	1	1
gene-LOC115705675	XP_030488932.2	1	auxin response factor 2B	AT5G62000.5	64.63	auxin response factor 2	PK16974.1	82.9715	112.463	119.115	126.179	67.4637	0.430613	0.00188715	0.0286625	0.582752	7.35347e-07	5.2323e-06	0.511271	0.00805164	0.122873	-0.314099	0.0604939	0.0982793
gene-LOC115707810	XP_030491739.2	1	glutathione S-transferase DHAR2	AT1G75270.1	66.98	dehydroascorbate reductase 2		51.2495	65.6832	64.0096	43.3077	17.7745	0.350831	0.018034	0.146356	-0.268906	0.071423	0.142253	0.310982	0.137026	0.654676	-1.54196	9.34759e-16	7.72952e-15
gene-LOC115703637	XP_030486734.2	1	ATP-dependent DNA helicase 2 subunit KU80	AT1G48050.1	59.62	Ku80 family protein		6.5754	8.25964	9.01348	5.0865	19.7177	0.319316	0.147454	0.526652	-0.361434	0.130989	0.231342	0.449381	0.0907608	0.541024	1.5971	2.55978e-13	1.77152e-12
gene-LOC115705679	XP_060968671.1	1	uncharacterized LOC115705679	AT1G80500.2	94.07	SNARE-like superfamily protein		14.4052	16.6215	16.7302	17.3082	17.6826	0.197625	0.435311	0.816454	0.230242	0.365751	0.5061	0.19961	0.493826	0.944339	0.278474	0.340655	0.432462
gene-LOC115705676	XP_030488934.2	1	DNA polymerase lambda	AT1G10520.1	66.98	DNA polymerase lambda (POLL)		19.0608	17.7346	17.7377	21.4937	38.1063	-0.10848	0.580787	0.892287	0.150688	0.372211	0.512737	-0.111115	0.671995	0.9793	0.9902	1.60936e-06	5.75178e-06
gene-LOC115705673	XP_030488931.2	1	ATP-dependent Clp protease ATP-binding subunit ClpA homolog CD4B, chloroplastic-like	AT5G50920.1	89.6	CLPC homologue 1		98.2183	115.935	103.936	60.9967	50.644	0.23064	0.167648	0.559261	-0.709183	1.22961e-08	1.15457e-07	0.070436	0.789219	0.993364	-0.971223	7.20241e-08	3.03231e-07
gene-LOC115705672	XP_030488930.1	1	ATP-dependent Clp protease ATP-binding subunit ClpA homolog CD4B, chloroplastic	AT5G50920.1	90.46	CLPC homologue 1		126.237	150.501	134.638	72.6329	58.8593	0.245018	0.118009	0.470997	-0.819727	5.90599e-12	8.61058e-11	0.0817528	0.739041	0.987657	-1.1162	1.95077e-11	1.1732e-10
gene-LOC115705671	XP_030488927.2	1	dual specificity protein phosphatase PHS1	AT5G23720.3	66.96	dual specificity protein phosphatase family protein		4.57516	4.39558	5.53513	7.13205	5.83559	-0.0552442	0.811509	0.958716	0.651794	0.00163882	0.00565106	0.262955	0.321679	0.86458	0.342102	0.195668	0.271204
gene-LOC115715816	XP_030500347.2	1	serine carboxypeptidase-like 45	AT1G28110.2	73.71	serine carboxypeptidase-like 45		1.30814	1.18292	1.87078	2.26955	0.910363	-0.156526	0.734062	0.939846	0.755384	0.0630702	0.128644	0.487412	0.283903	0.839378	-0.548632	0.297896	0.38736
gene-LOC115705740	XP_030489021.1	1	coiled-coil domain-containing protein SCD2	AT3G48860.2	67.18	coiled-coil protein		25.6795	23.0526	21.0892	24.6009	27.3094	-0.162469	0.317012	0.737103	-0.0863827	0.562514	0.687832	-0.29481	0.178669	0.723859	0.0739773	0.691495	0.761625
gene-LOC115705776	XP_030489075.2	1	thaumatin-like protein 1b	AT1G20030.1	57.39	Pathogenesis-related thaumatin superfamily protein		2.27873	1.87119	3.08064	6.30003	416.613	-0.315573	0.553263	0.879597	1.43037	0.00116368	0.00418052	0.413175	0.4201	0.918418	7.49612	4.96686e-203	5.245e-200
gene-LOC115705795	XP_030489099.2	1	histone H3-like centromeric protein CENH3	AT1G01370.4	60.4	Histone superfamily protein		30.4569	38.0772	38.4592	13.6079	28.5414	0.316431	0.114048	0.461332	-1.19512	7.30965e-07	5.20327e-06	0.324881	0.205841	0.765665	-0.105956	0.675264	0.747462
gene-LOC115705756	XP_030489044.2	1	uncharacterized LOC115705756	AT1G34380.2	69.53	5'-3' exonuclease family protein;start_range=.,12552995		3.54521	2.79362	3.20091	2.93871	3.38622	-0.354025	0.26157	0.681016	-0.293787	0.348534	0.488661	-0.154132	0.654696	0.978482	-0.0818831	0.8121	0.858112
gene-LOC115705742	XP_030489025.2	1	pentatricopeptide repeat-containing protein At1g79080, chloroplastic	AT1G79080.1	61.98	Pentatricopeptide repeat (PPR) superfamily protein		7.13083	11.4292	9.58313	6.03961	3.56169	0.675509	0.00156127	0.0247664	-0.26178	0.256159	0.388628	0.417668	0.150325	0.682152	-1.01687	0.000522455	0.00130377
gene-LOC115705789	XP_030489091.1	1	probable glutathione S-transferase	AT1G78380.1	74.54	glutathione S-transferase TAU 19		83.7279	52.2222	47.4873	7.57784	20.7482	-0.685209	0.00308822	0.0413235	-3.48952	4.02494e-58	8.27126e-56	-0.826051	0.0057107	0.0965528	-2.02196	2.58695e-17	2.36461e-16
gene-LOC115705788	XP_030489089.2	1	glutathione S-transferase U19	AT1G78380.1	76.28	glutathione S-transferase TAU 19		74.7548	70.2697	69.7296	67.9552	54.7044	-0.0936704	0.607859	0.90073	-0.161665	0.340335	0.480208	-0.108019	0.642284	0.976293	-0.463466	0.0398935	0.0679605
gene-LOC133036208	XP_060968703.1	1	uncharacterized LOC133036208	AT5G53670.1	35.41	transmembrane protein;start_range=.,21796997		0.140744	0.12629	0.1074	0.0838617	0.328324	0	1	1	0	1	1	0	1	1	0	1	1
gene-LOC115705787	XP_060964531.1	1	glutathione S-transferase U25	AT1G17180.1	71.84	glutathione S-transferase TAU 25		0.175092	0.373692	0.582765	0.155164	1.24709	0	1	1	0	1	1	0	1	1	0	1	1
gene-LOC115705786	XP_030489087.2	1	probable glutathione S-transferase	AT1G17180.1	56.56	glutathione S-transferase TAU 25		25.7992	41.2066	47.8734	8.1361	9.57496	0.669061	0.000718546	0.0135355	-1.69791	2.45032e-11	3.31225e-10	0.878707	0.00196892	0.0427635	-1.44414	4.98313e-07	1.89087e-06
gene-LOC133033601	XP_060964534.1	1	uncharacterized LOC133033601	AT3G09510.1	28.67	Ribonuclease H-like superfamily protein;start_range=.,2921804		0	0.0421706	0	0	0.0467449	0	1	1	0	1	1	0	1	1	0	1	1
gene-LOC133029053	XP_060962971.1	1	protein ALP1-like	AT2G13770.1	78.53	nuclease		0	0	0	0	0	0	1	1	0	1	1	0	1	1	0	1	1
gene-LOC115704339	XP_060964543.1	1	uncharacterized LOC115704339	AT4G29090.1	27.48	Ribonuclease H-like superfamily protein;start_range=.,14333528		0	0	0	0	0	0	1	1	0	1	1	0	1	1	0	1	1
gene-LOC115700372	XP_060968721.1	1	uncharacterized LOC115700372	AT1G31150.1	23.18	K-box region protein (DUF1985)		0.020707	0.0063051	0.0073688	0	0.00703255	0	1	1	0	1	1	0	1	1	0	1	1
gene-LOC133036233	XP_060968736.1	1	uncharacterized LOC133036233	AT1G06740.1	25.43	MuDR family transposase		0.0350456	0	0.050993	0.0517863	0	0	1	1	0	1	1	0	1	1	0	1	1
gene-LOC133033610	XP_060964547.1	1	uncharacterized LOC133033610	AT3G05850.1	32.56	MuDR family transposase		0	0	0	0	0	0	1	1	0	1	1	0	1	1	0	1	1
gene-LOC115708137	XP_030492194.2	1	leucine-rich repeat receptor-like serine/threonine-protein kinase At1g17230	AT1G17230.2	65.03	Leucine-rich receptor-like protein kinase family protein		2.11081	3.4509	3.0496	5.4205	1.90529	0.705648	0.00392582	0.0495019	1.34329	1.56998e-09	1.67601e-08	0.509219	0.0863287	0.531803	-0.178591	0.561775	0.647719
gene-LOC115708117	XP_030492173.2	1	serine/threonine-protein kinase WAG1	AT3G14370.1	62.5	Protein kinase superfamily protein		4.47837	6.52987	6.92771	10.03	5.26006	0.533854	0.0683184	0.344314	1.13479	3.00652e-05	0.000159491	0.615916	0.0786784	0.506171	0.215632	0.527149	0.616347
gene-LOC115705627	XP_030488881.1	1	hydroquinone glucosyltransferase	AT4G01070.1	55.58	UDP-Glycosyltransferase superfamily protein		85.3237	79.2	73.3144	40.2859	13.5027	-0.116259	0.458973	0.830326	-1.10909	3.10834e-14	5.83486e-13	-0.232246	0.301338	0.851137	-2.67753	1.47761e-41	3.7136e-40
gene-LOC133029191	XP_060957666.1	1	uncharacterized LOC133029191	AT5G53670.1	34.65	transmembrane protein;start_range=.,21796997		0	0	0	0	0	0	1	1	0	1	1	0	1	1	0	1	1
gene-LOC115707859	XP_030491806.1	1	glycine-rich cell wall structural protein 2-like	AT2G20560.1	63.16	DNAJ heat shock family protein		0	0	0	0	0	0	1	1	0	1	1	0	1	1	0	1	1
gene-LOC115703643	XP_030486741.2	1	endoplasmic reticulum oxidoreductin-1	AT1G72280.1	74.35	endoplasmic reticulum oxidoreductins 1		5.96252	5.3226	6.12019	5.25671	18.0282	-0.101759	0.715591	0.932797	-0.126519	0.655752	0.76494	-0.0524778	0.868392	0.996876	1.56672	8.40777e-10	4.32606e-09
gene-LOC115706388	XP_030489885.2	1	kinesin-like protein KIN-14Q	AT1G72250.2	60.6	Di-glucose binding protein with Kinesin motor domain-containing protein;start_range=.,27192902		14.1678	14.7762	14.4093	7.63221	7.12366	0.0531384	0.758371	0.945435	-0.914927	1.47095e-07	1.1685e-06	0.0142804	0.948493	0.99777	-1.00917	2.64882e-05	8.05005e-05
gene-LOC115705738	XP_030489018.2	1	uncharacterized LOC115705738	AT5G50350.1	28.42	hypothetical protein		12.3318	12.7363	12.3127	8.73736	6.79026	0.0393096	0.836841	0.966068	-0.521638	0.00763925	0.0216782	-0.013331	0.955197	0.998691	-0.875634	0.000241388	0.000638256
gene-LOC133032735	XP_060962976.1	1	uncharacterized LOC133032735	AT3G05850.1	27.46	MuDR family transposase		0.194115	0.243344	0.060348	0.268533	0.194636	0	1	1	0	1	1	0	1	1	0	1	1
gene-LOC115709040	XP_060968866.1	1	uncharacterized LOC115709040	AT5G45570.2	24.66	Ulp1 protease family protein;start_range=.,18472301		0.243115	0.0592895	0.139727	0.269431	0.0163362	0	1	1	0	1	1	0	1	1	0	1	1
gene-LOC133032736	XP_060962996.1	1	uncharacterized LOC133032736					0	0	0	0	0	0	1	1	0	1	1	0	1	1	0	1	1
gene-LOC115705783	XP_060968893.1	1	uncharacterized LOC115705783	AT2G43310.1	60.15	Ribosomal L18p/L5e family protein		5.18172	6.60525	5.06141	4.22009	14.2752	0.342633	0.318453	0.738101	-0.333352	0.400964	0.541118	-0.0478122	0.903846	0.997278	1.44571	8.18827e-06	2.68731e-05
gene-LOC115705625	XP_060968773.1	1	uncharacterized LOC115705625	AT4G00060.4	54.36	Nucleotidyltransferase family protein		11.4131	10.7777	9.75312	10.3488	8.10998	-0.104452	0.517949	0.862288	-0.179471	0.232468	0.360935	-0.245573	0.236336	0.800569	-0.525512	0.00534386	0.0110611
gene-LOC115705799	XP_030488874.2	1	dormancy-associated protein homolog 3-like	AT1G56220.1	66.92	Dormancy/auxin associated family protein		151.662	156.373	158.93	330.084	154.94	0.0383266	0.802198	0.956879	1.08698	4.72827e-17	1.13046e-15	0.0534784	0.815959	0.995721	0.0188149	0.915591	0.939454
gene-LOC115705621	XP_030488869.2	1	uncharacterized LOC115705621	AT3G60590.2	59.08	cytochrome P450 family protein		50.9407	68.5162	52.4046	37.2664	33.4762	0.420742	0.00925045	0.092386	-0.47795	0.00176189	0.0060249	0.0305217	0.891827	0.996876	-0.618794	0.00130635	0.00302289
gene-LOC115704337	XP_030487408.2	1	uncharacterized LOC115704337					0	0	0	0	0	0	1	1	0	1	1	0	1	1	0	1	1
gene-LOC115704336	XP_030487407.2	1	uncharacterized LOC115704336	AT4G29090.1	27.61	Ribonuclease H-like superfamily protein;start_range=.,14333528		0	0	0	0	0	0	1	1	0	1	1	0	1	1	0	1	1
gene-LOC133036326	XP_060968923.1	1	uncharacterized LOC133036326	AT1G06740.1	27.73	MuDR family transposase		0	0	0	0	0	0	1	1	0	1	1	0	1	1	0	1	1
gene-LOC115705631	XP_030489076.2	1	vesicle-associated protein 1-2	AT2G45140.1	69.39	plant VAP homolog 12		99.9398	95.7446	106.859	106.543	50.8877	-0.0688175	0.630476	0.907509	0.066612	0.591243	0.712215	0.0859471	0.66884	0.978814	-0.988374	7.44402e-09	3.48371e-08
gene-LOC115705629	XP_030488883.2	1	uncharacterized LOC115705629	AT1G73440.1	44.58	calmodulin-like protein		12.4034	9.57231	9.71539	11.7173	10.5477	-0.381714	0.128744	0.491965	-0.11078	0.644807	0.756752	-0.362994	0.247219	0.811529	-0.247956	0.404795	0.497963
gene-LOC115707217	XP_030490963.2	1	phosphatidate cytidylyltransferase 4, chloroplastic	AT2G45150.1	68.81	cytidinediphosphate diacylglycerol synthase 4		20.8483	20.5311	20.5282	16.6757	16.6223	-0.0307875	0.86324	0.972036	-0.347441	0.0459035	0.0993462	-0.0338581	0.884494	0.996876	-0.341982	0.103309	0.157196
gene-LOC115705915	XP_030489250.2	1	scarecrow-like protein 22	AT4G00150.1	62.05	GRAS family transcription factor	PK17954.1	9.50727	10.7433	10.2809	11.6819	4.75685	0.168547	0.362943	0.772514	0.27353	0.115774	0.209573	0.10147	0.67657	0.979766	-1.01299	4.91896e-05	0.000143843
gene-LOC115705815	XP_030489115.2	1	scarecrow-like protein 22	AT4G00150.1	62.6	GRAS family transcription factor	PK17954.1	7.96538	8.87768	9.36368	10.5471	4.14418	0.149816	0.475515	0.840243	0.382345	0.052572	0.111077	0.224236	0.436915	0.927766	-0.960737	0.00037731	0.000966119
gene-LOC115704100	XP_030487179.1	1	autophagy-related protein 8f	AT4G16520.2	88.89	Ubiquitin-like superfamily protein		15.292	16.1102	17.4845	28.5618	277.831	0.0709173	0.820673	0.961626	0.869254	0.000527518	0.00207995	0.181301	0.576978	0.966785	4.17244	6.238e-94	5.95662e-92
gene-LOC115707811	XP_030491740.2	1	root meristem growth factor 10	AT3G60650.1	26.14	transmembrane protein		0	0	0.0383387	3.2339	0.0415222	0	1	1	7.84906	5.66388e-07	4.10625e-06	0	1	1	0	1	1
gene-LOC115705841	XP_030489149.1	1	spindle and kinetochore-associated protein 1 homolog	AT3G60660.1	68.98	spindle/kinetochore-associated-like protein		7.14529	9.54743	9.3836	6.32234	26.0113	0.410278	0.137802	0.512264	-0.203391	0.496622	0.631366	0.382468	0.260728	0.822643	1.84839	3.83749e-13	2.62741e-12
gene-LOC115705840	XP_060968975.1	1	putative lipid-binding protein At4g00165	AT4G00165.2	67.65	Bifunctional inhibitor/lipid-transfer protein/seed storage 2S albumin superfamily protein		26.4126	20.919	18.7917	20.463	52.3203	-0.344082	0.0607589	0.323204	-0.394723	0.0289986	0.0676635	-0.503044	0.0383694	0.343424	0.971779	4.11643e-07	1.57666e-06
gene-LOC115705843	XP_030489150.2	1	lipid transfer protein EARLI 1	AT2G45180.1	65.47	Bifunctional inhibitor/lipid-transfer protein/seed storage 2S albumin superfamily protein		0.167198	5.005e-05	8.1468e-05	13.9711	104.393	0	1	1	6.5134	6.41295e-13	1.0414e-11	0	1	1	9.43587	1.0571e-27	1.62614e-26
gene-LOC115708261	XP_030492344.2	1	vesicle-associated protein 1-3	AT4G00170.1	66.39	Plant VAMP (vesicle-associated membrane protein) family protein		40.6048	42.7305	43.2105	35.507	24.4184	0.0671893	0.688198	0.926671	-0.221016	0.171617	0.285753	0.0792141	0.732921	0.985979	-0.748068	0.000325004	0.00084046
gene-LOC115705020	XP_030488112.1	1	protein RGF1 INDUCIBLE TRANSCRIPTION FACTOR 1	AT3G60670.1	57.54	PLATZ transcription factor family protein		11.3596	10.271	10.4698	10.2648	11.8252	-0.154464	0.54358	0.874176	-0.174504	0.483607	0.62021	-0.131794	0.688854	0.980067	0.041604	0.882615	0.913661
gene-LOC115708198	XP_030492268.1	1	protein GRAVITROPIC IN THE LIGHT 1	AT3G60680.1	60.08	DUF641 family protein (DUF641)		4.94193	4.60837	4.23888	6.4105	14.0971	-0.104263	0.701105	0.928573	0.354592	0.160125	0.270458	-0.227414	0.498994	0.947693	1.50115	7.43333e-08	3.12513e-07
gene-LOC115704995	XP_030488079.2	1	axial regulator YABBY 1	AT2G45190.1	64.35	Plant-specific transcription factor YABBY family protein	PK18424.5	60.0656	62.1921	62.0416	45.1157	12.4385	0.0409966	0.821779	0.962114	-0.443143	0.00680224	0.0195635	0.033644	0.892888	0.996876	-2.2892	3.46829e-25	4.88719e-24
gene-LOC133033617	XP_060964571.1	1	uncharacterized LOC133033617					0	0	0	0	0	0	1	1	0	1	1	0	1	1	0	1	1
gene-LOC115707687	XP_030491575.1	1	Golgi SNAP receptor complex member 1-2	AT2G45200.1	88.28	golgi snare 12		29.3726	25.7392	25.6141	23.8194	19.7798	-0.198364	0.297064	0.716841	-0.332551	0.0718875	0.143046	-0.209467	0.3762	0.893607	-0.584351	0.0205966	0.0375799
gene-LOC115708216	XP_030492292.1	1	auxin-responsive protein SAUR36	AT3G60690.1	50.89	SAUR-like auxin-responsive protein family		11.1817	14.7723	11.1041	19.7369	9.82084	0.392346	0.119253	0.473708	0.790744	9.40381e-05	0.000444736	-0.023973	0.938304	0.997613	-0.206732	0.46028	0.552668
gene-LOC115704846	XP_030487917.1	1	plasmodesmata-located protein 8	AT3G60720.3	66.93	plasmodesmata-located protein 8		3.45606	5.32447	5.9993	4.37022	3.57221	0.613043	0.105595	0.443272	0.302473	0.453483	0.592449	0.781128	0.0636666	0.45359	0.0215799	0.963003	0.973359
gene-LOC115705851	XP_030489157.1	1	pectinesterase 2	AT2G45220.1	68.05	Plant invertase/pectin methylesterase inhibitor superfamily		0.701828	3.11712	2.75767	13.2332	8.24014	2.15814	3.81263e-06	0.000160772	4.22846	3.88479e-38	3.33628e-36	1.98013	0.000112504	0.00400176	3.55305	4.5146e-17	4.07471e-16
gene-LOC133033625	XP_060964593.1	1	uncharacterized LOC133033625	AT2G25460.2	43.63	EEIG1/EHBP1 protein amino-terminal domain protein		0	0	0	0	0.579457	0	1	1	0	1	1	0	1	1	0	1	1
gene-LOC115702306	XP_060963009.1	1	uncharacterized LOC115702306					0.0129806	0.0130904	0.0437059	0.0105831	0	0	1	1	0	1	1	0	1	1	0	1	1
gene-LOC115704331	XP_030487403.2	1	putative receptor like protein 25	AT2G33030.1	44.09	receptor like protein 25;start_range=.,14017684		0	0	0.156015	0	0	0	1	1	0	1	1	0	1	1	0	1	1
gene-LOC115704330	XP_060964605.1	1	receptor-like protein Cf-9 homolog	AT3G05660.1	35.71	receptor like protein 33		0	0.0430563	0.0249588	0.0175401	0.0713745	0	1	1	0	1	1	0	1	1	0	1	1
gene-LOC115706413	XP_030489919.2	1	methionine aminopeptidase 1A	AT2G45240.1	82.34	methionine aminopeptidase 1A		34.3117	37.7463	35.3573	26.4485	54.116	0.129458	0.415084	0.806446	-0.401687	0.00759826	0.0215867	0.0318361	0.879364	0.996876	0.642088	0.000311623	0.000808186
gene-LOC115705831	XP_030489137.2	1	tubulin-folding cofactor D	AT3G60740.1	68.8	ARM repeat superfamily protein;start_range=.,22447936		9.44703	9.17644	8.84199	11.3447	5.76154	-0.0501947	0.772425	0.950551	0.24126	0.126746	0.225323	-0.104709	0.634237	0.975559	-0.727732	0.000517169	0.00129145
gene-LOC115705610	XP_030488855.2	1	pectinesterase inhibitor 9	AT4G00080.1	41.18	Plant invertase/pectin methylesterase inhibitor superfamily protein		1.35021	1.82695	1.29568	3.0011	2.11549	0.437223	0.427323	0.812763	1.14431	0.0224447	0.0545537	-0.0370608	0.953735	0.998488	0.642993	0.288037	0.377433
gene-LOC115705609	XP_030488848.2	1	protein GRAVITROPIC IN THE LIGHT 1	AT2G45260.1	74.77	myosin-4 protein (DUF641)		80.9787	84.5453	89.3614	94.7634	85.7585	0.0480819	0.737631	0.940357	0.198134	0.123805	0.22112	0.123801	0.528236	0.9562	0.05233	0.758257	0.816289
gene-LOC115706405	XP_030489906.2	1	arginase 1, mitochondrial	AT4G08900.1	87.87	arginase		16.0983	23.2206	24.8535	29.1699	30.032	0.521696	0.00689827	0.0750315	0.831391	4.93919e-06	3.0202e-05	0.615683	0.00930107	0.135878	0.884825	4.50286e-05	0.000132626
gene-LOC115704686	XP_030487746.2	1	protein NRT1/ PTR FAMILY 7.2	AT1G32450.1	56.82	nitrate transporter 1.5		1.03003	1.33454	1.72859	0.883904	0.650128	0.365891	0.429933	0.813292	-0.239893	0.648833	0.760054	0.73591	0.11793	0.610958	-0.705338	0.252897	0.337954
gene-LOC133033648	XP_060964627.1	1	uncharacterized LOC133033648	AT4G29090.1	32.14	Ribonuclease H-like superfamily protein;start_range=.,14333528		0	0	0	0	0	0	1	1	0	1	1	0	1	1	0	1	1
gene-LOC115707800	XP_030491731.2	1	probable tRNA N6-adenosine threonylcarbamoyltransferase, mitochondrial	AT2G45270.1	71.94	glycoprotease 1		10.3331	11.7982	11.5309	8.2993	7.45614	0.182384	0.414528	0.806373	-0.342227	0.104763	0.193829	0.147635	0.561787	0.965903	-0.485252	0.0560377	0.0919421
gene-LOC115705608	XP_030488847.2	1	valine--tRNA ligase, mitochondrial 1	AT1G14610.1	73.72	valyl-tRNA synthetase / valine-tRNA ligase (VALRS)		44.3291	41.3949	40.4218	45.353	27.6628	-0.106723	0.46303	0.833175	0.0108453	0.930924	0.958641	-0.14335	0.477615	0.942376	-0.696221	8.53386e-05	0.000240314
gene-LOC115705606	XP_030488846.2	1	dehydration-responsive element-binding protein 1B-like	AT5G51990.1	57.65		PK23332.1	0.276858	0.240349	0.0933755	0.0985241	0.355907	0	1	1	0	1	1	0	1	1	0	1	1
gene-LOC115707894	XP_030491849.2	1	dehydration-responsive element-binding protein 1B-like	AT5G51990.1	57.14		PK23332.1	0.251522	0.362021	0	0.0296461	0.24226	0	1	1	0	1	1	0	1	1	0	1	1
gene-LOC115719980	XP_060963022.1	1	uncharacterized LOC115719980	AT3G05850.1	34.72	MuDR family transposase		0	0	0	0	0.0137902	0	1	1	0	1	1	0	1	1	0	1	1
gene-LOC115707892	XP_030491846.2	1	DNA repair protein RAD51 homolog 3	AT2G45280.1	68.88	RAS associated with diabetes protein 51C		5.35784	8.26455	7.86747	5.89473	11.5884	0.586313	0.0331516	0.220612	0.0602254	0.839519	0.899495	0.502109	0.111886	0.598615	1.06031	0.000345475	0.000890703
gene-LOC133033660	XP_060964641.1	1	uncharacterized LOC133033660	AT2G13980.1	30.53	Polynucleotidyl transferase%2C ribonuclease H-like superfamily protein;start_range=.,5869853		0	0	0	0	0	0	1	1	0	1	1	0	1	1	0	1	1
gene-LOC115705598	XP_030488832.2	1	transketolase, chloroplastic	AT2G45290.2	83.51	Transketolase		328.46	551.261	439.877	224.525	169.536	0.737704	4.56128e-05	0.00137436	-0.572203	1.94055e-07	1.50823e-06	0.408765	0.505764	0.94956	-0.971244	8.83816e-06	2.88478e-05
gene-LOC115705595	XP_030488829.1	1	3-phosphoshikimate 1-carboxyvinyltransferase 2	AT2G45300.4	78.05	RNA 3'-terminal phosphate cyclase/enolpyruvate transferase%2C alpha/beta		75.2758	77.5934	75.6086	62.5182	37.8105	0.0357105	0.802482	0.957014	-0.292819	0.0207688	0.0511062	-0.00503356	0.980847	0.999496	-1.00922	1.98358e-08	8.92237e-08
gene-LOC115705604	XP_030488845.2	1	prefoldin subunit 1	AT2G07340.1	67.97	PREFOLDIN 1		54.2798	61.7438	65.131	56.6516	55.5024	0.183238	0.342479	0.758389	0.0271065	0.886569	0.930728	0.252493	0.30256	0.852439	0.0222914	0.922376	0.944436
gene-LOC115704326	XP_060963095.1	1	L-type lectin-domain containing receptor kinase S.4-like	AT3G55550.1	49.13			0.19389	0.302403	0.260977	0.0875468	0.397083	0	1	1	0	1	1	0	1	1	0	1	1
gene-LOC115705597	XP_030488831.2	1	dynamin-like protein ARC5	AT3G19720.1	78.46	P-loop containing nucleoside triphosphate hydrolases superfamily protein		42.7109	57.7793	55.856	39.2884	19.3058	0.427489	0.00380076	0.048361	-0.144115	0.268395	0.403119	0.375856	0.080757	0.512955	-1.16243	3.75631e-08	1.63593e-07
gene-LOC115704308	XP_030487382.2	1	uncharacterized LOC115704308	AT5G07900.1	30.67	Mitochondrial transcription termination factor family protein		16.1976	15.0809	13.7714	8.90634	8.8942	-0.108454	0.60059	0.89747	-0.889498	2.33819e-05	0.000127044	-0.242981	0.333747	0.870749	-0.876635	0.000392565	0.00100175
gene-LOC115704656	XP_030487717.1	1	uncharacterized LOC115704656	AT5G07900.1	32.13	Mitochondrial transcription termination factor family protein		3.24331	3.48911	3.08371	2.28194	2.73697	0.0934503	0.796389	0.955826	-0.53511	0.172275	0.286522	-0.0885957	0.827327	0.995797	-0.265842	0.52733	0.616477
gene-LOC115704320	XP_030487394.2	1	sulfite exporter TauE/SafE family protein 3-like	AT2G25737.1	68.12	Sulfite exporter TauE/SafE family protein		0	0.0120774	0	0	4.40038	0	1	1	0	1	1	0	1	1	9.90959	3.44818e-11	2.02425e-10
gene-LOC115705591	XP_030488824.1	1	DNA gyrase subunit A, chloroplastic/mitochondrial	AT3G10690.1	74.89	DNA GYRASE A		34.1852	42.2324	43.9639	24.3195	24.7384	0.296587	0.0459762	0.274012	-0.514121	0.000157956	0.000707284	0.351457	0.111948	0.598758	-0.482173	0.00731747	0.0147285
gene-LOC115705592	XP_060963105.1	1	uncharacterized LOC115705592	AT5G04910.1	62.73	DNA repair REX1-B protein		9.69912	11.3134	11.7721	11.8963	21.9607	0.220667	0.414073	0.80582	0.267846	0.300317	0.438399	0.272654	0.406157	0.911992	1.16888	1.31655e-05	4.20546e-05
gene-LOC115706355	XP_030489835.2	1	vacuolar protein sorting-associated protein 36	AT5G04920.1	65.7	EAP30/Vps36 family protein		8.73107	9.27403	10.4052	10.0318	8.03653	0.075364	0.733108	0.939646	0.171766	0.413697	0.553481	0.237374	0.358121	0.882009	-0.137911	0.589565	0.672462
gene-LOC115704319	XP_060963118.1	1	uncharacterized LOC115704319	AT5G18440.2	38.59	GATA zinc finger protein		8.2681	9.05074	7.88419	10.4602	19.4126	0.122595	0.572363	0.889734	0.310598	0.13274	0.23355	-0.0743632	0.780412	0.992996	1.21721	1.35657e-07	5.55502e-07
gene-LOC115705589	XP_030488822.2	1	phospholipid-transporting ATPase 1-like	AT5G04930.1	72.21	aminophospholipid ATPase 1		2.39993	2.47532	2.71072	5.02975	2.37019	0.0347338	0.896082	0.97948	1.0428	3.96215e-06	2.47091e-05	0.161895	0.583468	0.967735	-0.0377757	0.91008	0.935136
gene-LOC115705590	XP_030488823.2	1	phospholipid-transporting ATPase 1-like	AT5G04930.1	72.27	aminophospholipid ATPase 1		11.6962	10.4916	11.1199	12.0241	17.3135	-0.16545	0.294974	0.714392	0.0175775	0.904208	0.942282	-0.0838624	0.714139	0.983971	0.548716	0.0116294	0.022442
gene-LOC133032775	XP_060963182.1	1	glycine-rich cell wall structural protein-like					0	0	0	0.044804	383.253	0	1	1	0	1	1	0	1	1	14.3331	1.54295e-17	1.42678e-16
gene-LOC115708307	XP_030492396.1	1	glycine-rich protein	AT2G05540.1	37.31	Glycine-rich protein family		186.387	118.145	116.952	163.151	46.9963	-0.658959	0.000894389	0.0160369	-0.222658	0.133833	0.234945	-0.681619	0.0020697	0.0443782	-1.99765	2.09392e-24	2.82632e-23
gene-LOC115706327	XP_030489804.2	1	uncharacterized LOC115706327					47.0049	52.8214	54.4672	121.171	30.92	0.164082	0.369775	0.776556	1.33674	2.09924e-19	6.04959e-18	0.201201	0.392731	0.901958	-0.618301	0.00363459	0.00777227
gene-LOC133033663	XP_060964662.1	1	uncharacterized LOC133033663	AT4G29090.1	29.21	Ribonuclease H-like superfamily protein;start_range=.,14333528		0	0	0	0	0.027225	0	1	1	0	1	1	0	1	1	0	1	1
gene-LOC115708168	XP_030492239.2	1	cyclic dof factor 3	AT5G39660.3	34.51	cycling DOF factor 2	PK10827.1	3.90421	3.20978	3.10853	4.19099	5.2785	-0.287703	0.315323	0.735826	0.0845609	0.759021	0.842153	-0.336399	0.297021	0.847698	0.421182	0.154586	0.222294
gene-LOC115708103	XP_030492154.2	1	probable inactive leucine-rich repeat receptor-like protein kinase At3g03770	AT3G03770.3	55.17	Leucine-rich repeat protein kinase family protein		29.7682	30.5673	29.2854	30.1374	10.3991	0.0308544	0.84381	0.96756	-0.00478105	0.972677	0.983156	-0.034146	0.877556	0.996876	-1.53227	2.50341e-14	1.87412e-13
gene-LOC115705804	XP_030489109.1	1	ubiquitin-like protein 5	AT5G42300.1	95.89	ubiquitin-like protein 5		274.129	209.971	243.435	313.252	242.192	-0.387855	0.0119817	0.111038	0.155581	0.233032	0.361712	-0.183648	0.416357	0.916509	-0.1876	0.311605	0.402007
gene-LOC115705730	XP_030489006.2	1	polyadenylation and cleavage factor homolog 4	AT4G04885.1	49.18	PCF11P-similar protein 4		17.2379	18.5817	18.3013	16.0902	31.0067	0.0573391	0.727644	0.937774	-0.136669	0.379964	0.520799	0.0769469	0.728562	0.985213	0.818085	0.000157021	0.000426194
gene-LOC115705760	XP_030489050.2	1	chlorophyll(ide) b reductase NOL, chloroplastic	AT5G04900.1	72.68	NYC1-like protein		10.8325	14.0735	10.913	6.725	4.39773	0.370283	0.110203	0.453761	-0.716343	0.00594129	0.0173946	-0.0023227	0.993663	0.999496	-1.3167	3.81623e-05	0.000113501
gene-LOC115705775	XP_060963140.1	1	NADPH-dependent pterin aldehyde reductase	AT1G10310.1	73.86	NAD(P)-binding Rossmann-fold superfamily protein		22.121	28.8148	25.33	13.3483	51.2353	0.371969	0.0702073	0.349744	-0.757347	0.0006897	0.00263838	0.180746	0.480613	0.943183	1.19775	2.84729e-08	1.26084e-07
gene-LOC115705727	XP_030489001.2	1	DExH-box ATP-dependent RNA helicase DExH3	AT5G04895.1	80.98	DEA(D/H)-box RNA helicase family protein		8.09334	8.11007	8.2987	9.44515	6.29481	0.0018348	0.991902	0.998352	0.213664	0.198748	0.320126	0.050668	0.829695	0.995797	-0.379329	0.0775691	0.122452
gene-LOC115705743	XP_030489026.1	1	protein RBL	AT3G21060.1	74.72	Transducin/WD40 repeat-like superfamily protein		13.3342	13.3697	11.5367	11.6481	7.81946	0.0328045	0.869375	0.974417	-0.186066	0.34511	0.485042	-0.082363	0.756486	0.990708	-0.615158	0.0103753	0.0202475
gene-LOC115705749	XP_030489036.2	1	protein RESTRICTED TEV MOVEMENT 2	AT5G04890.1	46.94	HSP20-like chaperones superfamily protein		4.44561	3.79997	3.59005	2.70624	2.01078	-0.2319	0.474641	0.840085	-0.73989	0.0360617	0.0813616	-0.317929	0.440257	0.92949	-1.15732	0.00583591	0.0119829
gene-LOC115705739	XP_030489019.2	1	uncharacterized LOC115705739	AT5G04885.2	73.34	Glycosyl hydrolase family protein		20.6777	35.4587	37.4119	27.4138	28.8041	0.687486	6.86958e-05	0.0019508	0.352361	0.031341	0.0723079	0.755771	0.00100862	0.0251239	0.330182	0.11622	0.174504
gene-LOC115704364	XP_030487433.2	1	ERAD-associated E3 ubiquitin-protein ligase HRD1-like	AT5G08139.1	30.97	RING/U-box superfamily protein		0	0	0	0	0.131734	0	1	1	0	1	1	0	1	1	0	1	1
gene-LOC133033667	XP_060964675.1	1	uncharacterized LOC133033667	AT1G74875.1	30.64	F-box protein;start_range=.,28128470		0	0	0	0	5.15513	0	1	1	0	1	1	0	1	1	8.19352	2.16911e-07	8.65137e-07
gene-LOC133033671	XP_060964680.1	1	putative RING-H2 finger protein ATL50	AT5G08139.1	35.64	RING/U-box superfamily protein		0	0	0	0	0	0	1	1	0	1	1	0	1	1	0	1	1
gene-LOC133033673	XP_060964686.1	1	uncharacterized LOC133033673	AT5G45570.2	24.16	Ulp1 protease family protein;start_range=.,18472301		0	0	0	0	0	0	1	1	0	1	1	0	1	1	0	1	1
gene-LOC133033676	XP_060964689.1	1	uncharacterized LOC133033676	AT1G06740.1	19.78	MuDR family transposase		0	0	0	0	0	0	1	1	0	1	1	0	1	1	0	1	1
gene-LOC133033679	XP_060964694.1	1	uncharacterized LOC133033679	AT1G06740.1	24.14	MuDR family transposase		0	0	0	0	0	0	1	1	0	1	1	0	1	1	0	1	1
gene-LOC133033687	XP_060964702.1	1	ERAD-associated E3 ubiquitin-protein ligase HRD1-like	AT5G08139.1	35.64	RING/U-box superfamily protein		0	0	0	0	0	0	1	1	0	1	1	0	1	1	0	1	1
gene-LOC133029198	XP_060957671.1	1	uncharacterized LOC133029198					0	0	0	0	0	0	1	1	0	1	1	0	1	1	0	1	1
gene-LOC133033692	XP_060964709.1	1	uncharacterized LOC133033692	AT1G74875.1	27.81	F-box protein;start_range=.,28128470		0	0	0	0	0.858941	0	1	1	0	1	1	0	1	1	0	1	1
gene-LOC115704371	XP_030487441.1	1	putative RING-H2 finger protein ATL50	AT5G08139.1	35.64	RING/U-box superfamily protein		0	0	0	0	0	0	1	1	0	1	1	0	1	1	0	1	1
gene-LOC133033700	XP_060964727.1	1	uncharacterized LOC133033700	AT1G06740.1	25.23	MuDR family transposase		0	0	0	0	0	0	1	1	0	1	1	0	1	1	0	1	1
gene-LOC115704370	XP_030487440.2	1	putative RING-H2 finger protein ATL50	AT5G08139.1	35.64	RING/U-box superfamily protein		0	0	0	0	0	0	1	1	0	1	1	0	1	1	0	1	1
gene-LOC133033711	XP_060964749.1	1	uncharacterized LOC133033711	AT2G07190.1	22.93			0	0	0	0	0	0	1	1	0	1	1	0	1	1	0	1	1
gene-LOC133033714	XP_060964755.1	1	uncharacterized LOC133033714	AT5G45570.2	27.04	Ulp1 protease family protein;start_range=.,18472301		0	0	0	0	0.0373887	0	1	1	0	1	1	0	1	1	0	1	1
gene-LOC133033719	XP_060964764.1	1	uncharacterized LOC133033719					0	0	0	0	0	0	1	1	0	1	1	0	1	1	0	1	1
gene-LOC133033724	XP_060964770.1	1	uncharacterized LOC133033724	AT4G29090.1	33.33	Ribonuclease H-like superfamily protein;start_range=.,14333528		0	0	0	0	0.0592095	0	1	1	0	1	1	0	1	1	0	1	1
gene-LOC133033728	XP_060964779.1	1	uncharacterized LOC133033728	AT3G09510.1	26.56	Ribonuclease H-like superfamily protein;start_range=.,2921804		0	0	0	0	0	0	1	1	0	1	1	0	1	1	0	1	1
gene-LOC133033734	XP_060964788.1	1	uncharacterized LOC133033734	AT1G67623.1	28.65	F-box family protein		0	0	0	0	3.40246	0	1	1	0	1	1	0	1	1	7.57451	4.26784e-06	1.45216e-05
gene-LOC133033737	XP_060964791.1	1	putative RING-H2 finger protein ATL50	AT5G08139.1	35.64	RING/U-box superfamily protein		0	0	0	0	0	0	1	1	0	1	1	0	1	1	0	1	1
gene-LOC133033740	XP_060964794.1	1	uncharacterized LOC133033740	AT1G31150.1	28.04	K-box region protein (DUF1985)		0	0	0	0	0	0	1	1	0	1	1	0	1	1	0	1	1
gene-LOC133033743	XP_060964796.1	1	uncharacterized LOC133033743	AT5G45570.2	24.16	Ulp1 protease family protein;start_range=.,18472301		0	0	0	0	0	0	1	1	0	1	1	0	1	1	0	1	1
gene-LOC133033750	XP_060964797.1	1	uncharacterized LOC133033750	AT1G06740.1	24.14	MuDR family transposase		0	0	0	0	0	0	1	1	0	1	1	0	1	1	0	1	1
gene-LOC133033758	XP_060964798.1	1	uncharacterized LOC133033758	AT1G06740.1	25.63	MuDR family transposase		0	0	0	0	0	0	1	1	0	1	1	0	1	1	0	1	1
gene-LOC133033767	XP_060964799.1	1	uncharacterized LOC133033767	AT1G67623.1	29.21	F-box family protein		0	0	0	0	2.44476	0	1	1	0	1	1	0	1	1	7.12575	2.80326e-05	8.48208e-05
gene-LOC133033773	XP_060964800.1	1	putative RING-H2 finger protein ATL50	AT5G08139.1	35.64	RING/U-box superfamily protein		0	0	0	0	0	0	1	1	0	1	1	0	1	1	0	1	1
gene-LOC133036386	XP_060968976.1	1	uncharacterized LOC133036386					0.102613	0	0	0	0	0	1	1	0	1	1	0	1	1	0	1	1
gene-LOC133033778	XP_060964801.1	1	ERAD-associated E3 ubiquitin-protein ligase HRD1-like	AT5G08139.1	35.64	RING/U-box superfamily protein		0	0	0	0	0	0	1	1	0	1	1	0	1	1	0	1	1
gene-LOC115705752	XP_030489038.2	1	sucrose-phosphatase 1	AT2G35840.4	61.08	Sucrose-6F-phosphate phosphohydrolase family protein		8.45978	10.368	10.2745	11.0737	11.0907	0.285936	0.191893	0.596397	0.360602	0.0877791	0.168062	0.268957	0.300631	0.850382	0.365672	0.13748	0.201686
gene-LOC115704800	XP_030487867.1	1	uncharacterized LOC115704800	AT5G16010.1	52.11	3-oxo-5-alpha-steroid 4-dehydrogenase family protein		3.298	3.45341	3.71666	0.960897	1.59441	0.077116	0.859749	0.971342	-1.81883	0.00156126	0.00541512	0.166187	0.727128	0.985213	-1.05882	0.0640143	0.103409
gene-LOC115705070	XP_030488169.2	1	uncharacterized LOC115705070	AT5G16010.1	55.67	3-oxo-5-alpha-steroid 4-dehydrogenase family protein		16.5018	15.2363	12.9959	18.2326	6.94321	-0.122317	0.559427	0.88323	0.116137	0.562648	0.687884	-0.356062	0.170414	0.714023	-1.2616	5.82665e-06	1.9504e-05
gene-LOC115705719	XP_060968977.1	1	elongation factor 2-like	AT1G56070.3	93.12	Ribosomal protein S5/Elongation factor G/III/V family protein		1236.99	1151.17	1010.33	737.029	324.913	-0.11248	0.463533	0.833352	-0.769568	5.99142e-13	9.79393e-12	-0.303574	0.230396	0.795105	-1.94422	1.16658e-33	2.26161e-32
gene-LOC115705723	XP_060968978.1	1	ubiquitin C-terminal hydrolase 12-like	AT5G06600.1	84.2	ubiquitin-specific protease 12		35.5824	31.503	31.063	37.6579	110.297	-0.184822	0.218662	0.632005	0.059047	0.656706	0.765692	-0.207687	0.319211	0.863696	1.61508	1.67606e-16	1.45426e-15
gene-LOC115706399	XP_030489899.2	1	uncharacterized LOC115706399					0	0	0	0	0	0	1	1	0	1	1	0	1	1	0	1	1
gene-LOC115707240	XP_030490992.2	1	ABC transporter I family member 6, chloroplastic	AT3G10670.1	82.59	non-intrinsic ABC protein 7		44.2164	58.8631	50.652	26.1852	21.0273	0.407791	0.0117142	0.109404	-0.783146	4.19848e-07	3.09058e-06	0.18777	0.449715	0.93464	-1.08275	4.32239e-08	1.86617e-07
gene-LOC133033786	XP_060964802.1	1	stress response protein NST1-like					0	0	0	0	0	0	1	1	0	1	1	0	1	1	0	1	1
gene-LOC133036480	XP_060969014.1	1	protein cornichon homolog 4-like	AT1G12390.1	71.43	Cornichon family protein		9.74187	12.2835	10.3782	11.6125	8.22574	0.328665	0.149616	0.530844	0.217277	0.339837	0.479701	0.0695141	0.811902	0.99495	-0.260788	0.352424	0.445041
gene-LOC115695859	XP_030478807.2	1	pentatricopeptide repeat-containing protein At1g25360-like	AT1G25360.1	59.37	Pentatricopeptide repeat (PPR) superfamily protein		0.765278	0.747572	0.610178	0.515576	0.606108	-0.0413227	0.928853	0.983991	-0.604136	0.238731	0.368233	-0.342943	0.50949	0.95053	-0.347597	0.535275	0.623816
gene-LOC133036469	XP_060969004.1	1	MATH domain and coiled-coil domain-containing protein At3g58360-like	AT5G06600.3	52.7	ubiquitin-specific protease 12		19.2573	17.5582	19.0373	19.6824	15.9099	-0.137159	0.45214	0.826207	0.0152913	0.929861	0.957999	-0.0207068	0.927725	0.997603	-0.272906	0.218545	0.297913
gene-LOC133033794	XP_060964803.1	1	uncharacterized LOC133033794	AT2G02650.1	26.76			0	0	0	0	0.070235	0	1	1	0	1	1	0	1	1	0	1	1
gene-LOC133033801	XP_060964804.1	1	MATH domain and coiled-coil domain-containing protein At3g58360-like	AT5G06600.3	50	ubiquitin-specific protease 12		0.0933155	0.130327	0.137396	0.0917567	9.82699	0	1	1	0	1	1	0	1	1	6.70647	1.77599e-06	6.31465e-06
gene-LOC133032791	XP_060963243.1	1	MATH domain and coiled-coil domain-containing protein At3g58380-like	AT5G06600.3	51.03	ubiquitin-specific protease 12		7.65278	6.6076	5.77065	11.785	59.9373	-0.217973	0.40304	0.797418	0.605728	0.00561035	0.0165379	-0.407783	0.219749	0.783405	2.93758	3.37723e-49	1.05993e-47
gene-LOC115707368	XP_030491172.2	1	uncharacterized LOC115707368					0.0242368	0.0238099	0	0	0.460709	0	1	1	0	1	1	0	1	1	0	1	1
gene-LOC115705407	XP_030488602.2	1	U4/U6 small nuclear ribonucleoprotein Prp31 homolog	AT1G60170.1	78.1	pre-mRNA processing ribonucleoprotein binding region-containing protein		32.9317	31.8879	33.0972	43.7386	93.3401	-0.0523024	0.742848	0.941785	0.386112	0.00626765	0.0182142	-0.0022943	0.991142	0.999496	1.48998	5.36441e-18	5.10074e-17
gene-LOC115705032	XP_030488126.2	1	uncharacterized LOC115705032	AT1G50830.1	40.18			0.103031	0.0702941	0.140263	0.514202	0.890976	0	1	1	2.37929	0.0175768	0.0442653	0	1	1	3.12948	0.000886292	0.00212143
gene-LOC115704252	XP_060957673.1	1	ubiquitin C-terminal hydrolase 12-like	AT5G06600.2	49.66	ubiquitin-specific protease 12		1.26197	0.78577	0.775576	0.326736	2.59447	-0.663	0.310703	0.730532	-1.92806	0.00843728	0.023632	-0.705581	0.267397	0.828695	1.03083	0.0463881	0.077749
gene-LOC115705234	XP_030488364.2	1	MATH domain and coiled-coil domain-containing protein At3g58360	AT5G06600.3	55.47	ubiquitin-specific protease 12		6.34719	6.84581	7.77703	12.3052	9.11762	0.0985384	0.706894	0.930899	0.924489	6.78528e-05	0.000331326	0.278518	0.369284	0.887986	0.503482	0.074696	0.118521
gene-LOC115705233	XP_030488362.1	1	WAT1-related protein At4g19185	AT4G19185.1	69.9	nodulin MtN21 /EamA-like transporter family protein		12.4437	12.4755	12.4	9.75589	61.2653	-0.00602109	0.977342	0.995417	-0.379509	0.0788749	0.154242	-0.0102347	0.968109	0.999246	2.26686	3.69519e-30	6.22874e-29
gene-LOC115705375	XP_030488562.2	1	calcium-dependent protein kinase 1	AT5G04870.1	75.98	calcium dependent protein kinase 1		23.7633	22.0859	21.9658	30.2951	15.0126	-0.113167	0.498814	0.853545	0.326761	0.0231533	0.055961	-0.123885	0.558374	0.965551	-0.677296	0.000464773	0.00117087
gene-LOC115705380	XP_030488571.2	1	nuclear pore complex protein NUP1	AT3G10650.2	37.14	nuclear pore complex protein		27.8175	27.3972	28.5988	26.8483	97.9606	-0.0306163	0.834684	0.965305	-0.0731168	0.578685	0.701246	0.0284562	0.89826	0.997212	1.7986	8.66365e-15	6.66937e-14
gene-LOC115703675	XP_030486774.2	1	uncharacterized protein At2g39795, mitochondrial	AT4G32605.1	61.7	Mitochondrial glycoprotein family protein		13.9428	11.7195	12.6378	11.5373	34.3484	-0.254137	0.276791	0.69761	-0.298311	0.197586	0.31885	-0.151054	0.588204	0.968773	1.28954	4.15233e-08	1.79794e-07
gene-LOC115705385	XP_030488581.2	1	uncharacterized LOC115705385	AT3G11760.1	52.55	structural maintenance of chromosomes flexible hinge domain protein		7.71995	6.77163	6.98626	23.6614	17.0952	-0.197827	0.346375	0.762589	1.59142	1.02672e-21	3.44811e-20	-0.158158	0.542133	0.959625	1.13167	8.79754e-08	3.6652e-07
gene-LOC115705386	XP_030488583.2	1	uncharacterized LOC115705386	AT2G38680.1	66.56	5'-nucleotidase / magnesium ion binding protein		14.3855	13.9446	13.6426	11.854	12.1024	-0.0515347	0.819122	0.96123	-0.303865	0.176939	0.292495	-0.0842954	0.764438	0.991551	-0.25938	0.374389	0.467485
gene-LOC115704848	XP_030487920.2	1	uncharacterized protein At3g28850	AT5G01420.1	38.34	Glutaredoxin family protein		3.68321	3.06081	3.91976	1.37541	25.9726	-0.267443	0.410423	0.802741	-1.45475	0.000160877	0.000718701	0.0812052	0.820203	0.995721	2.80433	1.09357e-26	1.62784e-25
gene-LOC115704517	XP_030487578.1	1	upstream activation factor subunit UAF30	AT4G26810.2	80.61	SWIB/MDM2 domain superfamily protein		11.7899	14.9382	16.2544	11.6826	16.1615	0.349005	0.214376	0.627458	-0.0514788	0.863337	0.915882	0.450389	0.152668	0.686503	0.463994	0.175465	0.247252
gene-LOC115704254	XP_030487330.2	1	cucumber peeling cupredoxin-like	AT5G20230.1	33.74	blue-copper-binding protein		0	0	0	0	1.07853	0	1	1	0	1	1	0	1	1	0	1	1
gene-LOC115704255	XP_030487331.2	1	putative RING-H2 finger protein ATL71	AT5G06490.1	32.45	RING/U-box superfamily protein		0.0265228	0	0	0	0.0591615	0	1	1	0	1	1	0	1	1	0	1	1
gene-LOC115708181	XP_030492250.2	1	acetylserotonin O-methyltransferase	AT4G35160.1	49.22	O-methyltransferase family protein		18.1505	39.5844	45.1019	57.5059	11.7266	1.11555	3.06479e-09	2.54635e-07	1.63622	4.6451e-22	1.63307e-20	1.29955	4.61979e-08	4.14768e-06	-0.648343	0.00883462	0.0175248
gene-LOC115706804	XP_030490397.1	1	RING-H2 finger protein ATL70-like	AT5G06490.1	45.05	RING/U-box superfamily protein		0.639406	0.391189	0.219421	0.290412	1.09407	0	1	1	0	1	1	0	1	1	0	1	1
gene-LOC133032847	XP_060963329.1	1	uncharacterized LOC133032847					0.697411	0.389579	0.18634	0.0639248	0.130176	-0.857602	0.276753	0.69761	-3.19042	0.00441433	0.0134179	-2.00711	0.0422259	0.365331	-2.37418	0.0329791	0.057435
gene-LOC115704256	XP_060964806.1	1	uncharacterized LOC115704256	AT5G45570.2	25	Ulp1 protease family protein;start_range=.,18472301		0.0725397	0.0265315	0	0.0327294	0.0447039	0	1	1	0	1	1	0	1	1	0	1	1
gene-LOC133032857	XP_060963332.1	1	uncharacterized LOC133032857					0	0	0	0	0	0	1	1	0	1	1	0	1	1	0	1	1
gene-LOC115704847	XP_030487919.2	1	uncharacterized LOC115704847					0	0	0	0	0	0	1	1	0	1	1	0	1	1	0	1	1
gene-LOC115716195	XP_060963330.1	1	uncharacterized LOC115716195					0	0	0	0	0	0	1	1	0	1	1	0	1	1	0	1	1
gene-LOC115705392	XP_030488586.1	1	dnaJ protein homolog	AT5G22060.1	80.33	DNAJ homologue 2		245.752	160.753	161.603	208.584	162.781	-0.620882	9.7737e-06	0.000373649	-0.262814	0.0335919	0.0767016	-0.616607	0.00178901	0.0397824	-0.609541	0.000209647	0.000559891
gene-LOC115708203	XP_030492273.2	1	basic leucine zipper 34	AT5G04840.1	45.37	bZIP protein		43.9063	35.0937	37.5263	29.8214	24.9974	-0.282705	0.0801169	0.378122	-0.579744	0.000128427	0.000586641	-0.235086	0.261274	0.823256	-0.873606	7.0835e-06	2.34748e-05
gene-LOC115705108	XP_030488209.2	1	F-box/FBD/LRR-repeat protein At2g26030	AT5G02930.1	29.02	F-box/RNI-like superfamily protein		0	0.19951	0.0468519	0.111664	3.02789	0	1	1	0	1	1	0	1	1	8.54798	3.41728e-08	1.49773e-07
gene-LOC115706098	XP_030489482.1	1	vacuolar protein sorting-associated protein 60.2	AT3G10640.1	82.48	SNF7 family protein		53.7653	49.9629	50.8342	44.443	79.9771	-0.111329	0.50944	0.85816	-0.302291	0.0517185	0.10962	-0.0915304	0.701965	0.98024	0.560799	0.00593069	0.0121636
gene-LOC115705520	XP_030488722.2	1	uncharacterized LOC115705520	AT3G44190.1	64.53	FAD/NAD(P)-binding oxidoreductase family protein		19.264	15.5767	14.904	20.6314	19.7323	-0.313123	0.108476	0.44899	0.0739972	0.676907	0.781904	-0.38068	0.125996	0.629943	0.0230651	0.926292	0.94707
gene-LOC115707104	XP_030490811.1	1	uncharacterized LOC115707104	AT3G44190.1	63.64	FAD/NAD(P)-binding oxidoreductase family protein		0.0587255	0.0893415	0	0.0243008	2.20472	0	1	1	0	1	1	0	1	1	5.39578	1.31725e-05	4.20624e-05
gene-LOC115705397	XP_030488592.2	1	uricase-2 isozyme 1	AT2G26230.1	71.84	uricase / urate oxidase / nodulin 35		16.9057	6.36001	6.68896	14.94	12.0909	-1.36095	2.8568e-16	9.04636e-14	-0.239391	0.0834403	0.161239	-1.26957	8.73579e-10	1.2413e-07	-0.50823	0.00460531	0.00966841
gene-LOC115705396	XP_030488591.2	1	uncharacterized LOC115705396	AT3G10630.1	61.93	UDP-Glycosyltransferase superfamily protein		1.1375e-91	8.45e-66	1.34e-60	2.05e-41	1.995e-27	0	1	1	0	1	1	0	1	1	0	1	1
gene-LOC115705398	XP_030488593.2	1	nudix hydrolase 26, chloroplastic	AT3G10620.1	66.51	nudix hydrolase homolog 26		23.9005	25.1503	23.954	24.8873	22.9288	0.0674004	0.729577	0.938548	0.0308139	0.876166	0.923998	-0.00668575	0.978275	0.999496	-0.0703445	0.763495	0.820194
gene-LOC115705400	XP_030488594.1	1	exocyst complex component EXO70A1	AT5G03540.1	81.28	exocyst subunit exo70 family protein A1		39.9569	36.8142	33.3542	50.9878	24.1859	-0.125612	0.388788	0.790091	0.328784	0.00945442	0.0261124	-0.270616	0.173509	0.718119	-0.739182	2.54068e-05	7.74631e-05
gene-LOC115707513	XP_030491368.2	1	uncharacterized LOC115707513	AT5G04830.2	68.75	Nuclear transport factor 2 (NTF2) family protein		3.99784	2.93729	2.33979	6.66734	16.012	-0.454605	0.275328	0.696126	0.716795	0.0404875	0.0896019	-0.786683	0.0949483	0.552351	1.98211	4.08786e-10	2.16348e-09
gene-LOC115706215	XP_030489653.2	1	protein SMAX1-LIKE 3	AT3G52490.1	45.66	Double Clp-N motif-containing P-loop nucleoside triphosphate hydrolases superfamily protein		9.70599	13.076	13.1248	15.3803	4.36414	0.422415	0.0179992	0.146217	0.640873	9.35805e-05	0.000443179	0.423935	0.0782134	0.504466	-1.16863	5.73e-07	2.15521e-06
gene-LOC115704751	XP_030487814.2	1	uncharacterized LOC115704751	AT1G71430.1	53.21	hypothetical protein		12.443	13.6627	16.1557	20.8819	20.2891	0.134454	0.609817	0.901635	0.721989	0.00246983	0.00809304	0.370316	0.247751	0.811917	0.698665	0.0159335	0.0298579
gene-LOC133032923	XP_060963382.1	1	transcription repressor OFP13-like	AT5G04820.1	57.29	ovate family protein 13		11.2546	9.59092	9.74421	17.4816	20.6681	-0.242007	0.358326	0.768546	0.605473	0.00993055	0.0272573	-0.222623	0.463833	0.939543	0.859077	0.00117926	0.0027576
gene-LOC115708262	XP_030492345.2	1	transcription repressor OFP13	AT5G04820.1	57.79	ovate family protein 13		9.83643	7.96668	7.80844	18.4596	14.233	-0.315915	0.254198	0.672285	0.877281	0.000241646	0.00103378	-0.347316	0.272066	0.830988	0.515325	0.073503	0.116908
gene-LOC133033844	XP_060964824.1	1	putative F-box/FBD/LRR-repeat protein At5g56810	AT4G26340.1	28.46	F-box/RNI-like/FBD-like domains-containing protein;start_range=.,13324130		0.101802	0.0374369	4.36e-13	3.3041e-06	0.0923205	0	1	1	0	1	1	0	1	1	0	1	1
gene-LOC115706841	XP_030490450.2	1	FBD-associated F-box protein At5g44490-like	AT4G26340.1	30.24	F-box/RNI-like/FBD-like domains-containing protein;start_range=.,13324130		0.46345	0.294418	0.631278	0.641398	0.800001	-0.630936	0.3819	0.78459	0.464906	0.447717	0.586692	0.425532	0.5325	0.956359	0.792197	0.210044	0.288259
gene-LOC115704884	XP_030487956.2	1	putative F-box/LRR-repeat protein At4g15060	AT4G15060.2	30.38	FBD%2C F-box/LRR protein;start_range=.,8600312		1.0993	1.15665	1.32929	1.49447	2.32766	0.0825991	0.873572	0.97481	0.452342	0.365735	0.5061	0.28469	0.598096	0.969223	1.10845	0.0250489	0.0448525
gene-LOC115704684	XP_030487741.2	1	probable FBD-associated F-box protein At1g32375	AT1G32375.2	31.25	F-box/RNI-like/FBD-like domains-containing protein;start_range=.,11679230		4.54383	3.98455	4.30134	4.11449	4.85661	-0.202956	0.535601	0.870478	-0.156422	0.630024	0.744691	-0.0931775	0.794454	0.993364	0.101167	0.789329	0.840253
gene-LOC115704318	XP_030487391.1	1	iron-sulfur assembly protein IscA-like 1, mitochondrial	AT2G16710.1	80	Iron-sulfur cluster biosynthesis family protein		11.4401	9.6216	10.5507	14.3375	19.8283	-0.257732	0.402575	0.797369	0.294527	0.294751	0.432357	-0.128285	0.704302	0.9808	0.779872	0.00936934	0.018457
gene-LOC133029204	XP_060957677.1	1	uncharacterized LOC133029204	AT5G06270.2	42.27	hypothetical protein		0	0	0	0	0.470243	0	1	1	0	1	1	0	1	1	0	1	1
gene-LOC115705820	XP_030489123.2	1	pentatricopeptide repeat-containing protein At5g04810, chloroplastic	AT5G04810.1	71.74	pentatricopeptide (PPR) repeat-containing protein		16.9519	21.9593	19.5637	14.7794	11.9387	0.366019	0.0380067	0.241723	-0.219612	0.184757	0.302387	0.197259	0.439029	0.929072	-0.5193	0.01083	0.0210503
gene-LOC115704734	XP_030487804.2	1	pentatricopeptide repeat-containing protein At5g04780, mitochondrial	AT5G04780.1	61.95	Pentatricopeptide repeat (PPR) superfamily protein		1.25962	1.38482	1.04848	1.32551	1.95539	0.141581	0.75975	0.946473	0.0648377	0.890502	0.933637	-0.257228	0.620464	0.973456	0.640655	0.198608	0.274706
gene-LOC115707701	XP_030491588.2	1	cationic amino acid transporter 7, chloroplastic	AT3G10600.1	76.64	cationic amino acid transporter 7		0.857817	1.52479	1.63704	1.52524	2.50321	0.831754	0.0509977	0.292214	0.807967	0.0625659	0.127782	0.924977	0.0416614	0.362411	1.53192	0.000496575	0.001244
gene-LOC115707908	XP_030491864.1	1	anaphase-promoting complex subunit 13	AT1G73177.1	71.43	bonsai		32.2946	34.1012	38.0524	34.5331	93.9613	0.0795215	0.669005	0.9215	0.0653849	0.714536	0.810408	0.236277	0.33438	0.871191	1.53398	9.16987e-14	6.57156e-13
gene-LOC133033846	XP_060964839.1	1	uncharacterized LOC133033846	AT1G43760.1	27.87			0	0	0	0	0	0	1	1	0	1	1	0	1	1	0	1	1
gene-LOC115705779	XP_030489079.1	1	transcription factor DIVARICATA	AT5G04760.1	63.11	Duplicated homeodomain-like superfamily protein	PK12836.1	10.0011	4.97232	6.94418	28.5076	131.132	-1.01304	0.00079425	0.0145682	1.48171	4.09871e-12	6.07313e-11	-0.541507	0.129063	0.636555	3.69909	1.00191e-76	6.46989e-75
gene-LOC133033847	XP_060964841.1	1	secreted RxLR effector protein 161-like	AT4G23160.3	26.4	cysteine-rich RECEPTOR-like kinase;start_range=.,12131325		0	0	0	0	0	0	1	1	0	1	1	0	1	1	0	1	1
gene-LOC115710847	XP_060963486.1	1	uncharacterized LOC115710847					0	0	0	0	0	0	1	1	0	1	1	0	1	1	0	1	1
gene-LOC133033848	XP_060964846.1	1	protein FAR1-RELATED SEQUENCE 5-like	AT4G38180.1	29.91	FAR1-related sequence 5		0	0.0125419	0.0149836	0	0	0	1	1	0	1	1	0	1	1	0	1	1
gene-LOC115705748	XP_030489035.2	1	abscisic acid 8'-hydroxylase CYP707A1	AT3G19270.2	67.16			0.679929	0.523344	0.571711	0.699474	0.292405	0	1	1	0.0238165	0.975111	0.984592	0	1	1	0	1	1
gene-LOC115705768	XP_060963513.1	1	tRNA (mnm(5)s(2)U34)-methyltransferase, chloroplastic	AT1G16445.1	53.44	S-adenosyl-L-methionine-dependent methyltransferases superfamily protein		9.43901	11.1168	10.5038	4.74552	33.9449	0.249175	0.351024	0.764599	-0.982995	0.001883	0.00637341	0.148762	0.638469	0.976217	1.86279	4.47298e-14	3.28555e-13
gene-LOC115705745	XP_030489030.2	1	geraniol 8-hydroxylase	AT2G45550.1	44.47	cytochrome P450%2C family 76%2C subfamily C%2C polypeptide 4		3.24127	2.74056	4.22555	0.894501	0.372024	-0.24245	0.518008	0.862291	-1.88758	6.92088e-05	0.000337195	0.371392	0.322949	0.866236	-3.11623	3.6979e-07	1.42365e-06
gene-LOC115705802	XP_030489108.1	1	uncharacterized protein At2g27730, mitochondrial	AT5G04750.1	54.55	F1F0-ATPase inhibitor protein		114.135	118.305	119.053	125.572	87.3135	0.0467213	0.777227	0.95084	0.103862	0.473426	0.610693	0.0493177	0.848973	0.996523	-0.398764	0.0372024	0.0639221
gene-LOC115705782	XP_030489084.1	1	uncharacterized LOC115705782	AT3G52220.1	60.37	leukocyte immunoglobulin-like receptor family A protein		21.2272	21.8828	19.2748	24.2172	25.0595	0.0215718	0.912074	0.982713	0.158984	0.397368	0.537861	-0.155532	0.540418	0.958405	0.225765	0.320315	0.411529
gene-LOC115705737	XP_030489016.2	1	pentatricopeptide repeat-containing protein At4g31850, chloroplastic	AT4G31850.1	46.14	proton gradient regulation 3;start_range=.,15403020		7.73337	7.68714	7.78309	7.61315	4.84065	-0.0213764	0.919612	0.982713	-0.0376017	0.850315	0.907234	0.00455195	0.985429	0.999496	-0.682606	0.00902294	0.0178608
gene-LOC115705790	XP_030489093.2	1	uncharacterized protein At2g38710	AT2G38710.4	75.36	AMMECR1 family		31.5791	34.5379	37.253	25.325	19.4596	0.120938	0.492929	0.849715	-0.346967	0.0446612	0.0971693	0.226752	0.306449	0.855484	-0.713676	0.00110852	0.0026044
gene-LOC115705781	XP_030489080.1	1	vesicle-associated membrane protein 727	AT3G54300.3	84.87	vesicle-associated membrane protein 727		33.6257	40.0889	43.4216	47.2754	46.9487	0.239638	0.188609	0.591667	0.456899	0.00451622	0.013677	0.347782	0.115279	0.60667	0.472582	0.0191127	0.0351732
gene-LOC115705761	XP_030489051.2	1	uncharacterized LOC115705761	AT3G54290.1	53.52	hemerythrin HHE cation-binding domain protein		74.9115	96.4956	91.941	147.275	72.7215	0.356492	0.0183617	0.148108	0.949272	2.36117e-12	3.57845e-11	0.283111	0.163565	0.703716	-0.0599148	0.773934	0.828088
gene-LOC115705767	XP_030489064.1	1	ribonuclease H2 subunit A	AT2G25100.1	71.28	Polynucleotidyl transferase%2C ribonuclease H-like superfamily protein		16.0667	18.8562	16.3752	15.3364	12.3193	0.22509	0.292289	0.711076	-0.0936959	0.660143	0.768246	0.015651	0.953436	0.998358	-0.396031	0.12617	0.187253
gene-LOC115705794	XP_030489098.2	1	uncharacterized LOC115705794					1.63082	3.16642	3.07686	5.31607	1.86935	0.935988	0.0918012	0.410744	1.68237	0.000642048	0.0024761	0.89516	0.132665	0.647287	0.159205	0.823872	0.867763
gene-LOC115705735	XP_030489013.2	1	pentatricopeptide repeat-containing protein At3g49740	AT3G49740.1	52	Tetratricopeptide repeat (TPR)-like superfamily protein		1.31917	0.90368	0.950144	1.23023	2.75367	-0.56791	0.186001	0.586998	-0.118186	0.77227	0.851485	-0.50173	0.266486	0.828695	1.03715	0.00518389	0.0107672
gene-LOC115705800	XP_030489106.1	1	small ribosomal subunit protein eS25y	AT4G39200.1	89.81	Ribosomal protein S25 family protein		494.091	503.098	634.064	324.584	350.994	0.0249388	0.870737	0.97443	-0.638656	4.04706e-06	2.51658e-05	0.351219	0.125628	0.62973	-0.500501	0.00674373	0.0136748
gene-LOC115717957	XP_060964855.1	1	uncharacterized LOC115717957					0	0.0351497	0	0	0	0	1	1	0	1	1	0	1	1	0	1	1
gene-LOC115705796	XP_030489100.2	1	uncharacterized LOC115705796	AT2G27510.1	52.9	ferredoxin 3		80.2192	80.0618	98.7351	81.5975	100.584	-0.0106514	0.950326	0.989526	-0.00643284	0.965163	0.978578	0.283316	0.254149	0.814918	0.317629	0.0982624	0.150513
gene-LOC115705797	XP_030489103.1	1	iron-sulfur assembly protein IscA-like 1, mitochondrial	AT2G16710.1	78.4	Iron-sulfur cluster biosynthesis family protein		6.42214	5.5378	4.73675	4.13543	5.69588	-0.214365	0.554535	0.880308	-0.663301	0.0896424	0.171136	-0.458086	0.267113	0.828695	-0.192969	0.636198	0.713656
gene-LOC115705778	XP_030489077.2	1	uncharacterized LOC115705778	AT5G56610.1	30.53	Phosphotyrosine protein phosphatases superfamily protein		19.1611	17.9597	19.5922	17.6138	20.143	-0.12957	0.506219	0.857063	-0.156359	0.399649	0.539973	0.00435519	0.985206	0.999496	0.0672175	0.766105	0.822064
gene-LOC115705784	XP_030489086.1	1	uncharacterized LOC115705784	AT1G47640.1	88.11	seven transmembrane domain protein		68.9309	65.0547	76.1554	51.345	242.4	-0.0882932	0.588978	0.894796	-0.45318	0.0032407	0.0102381	0.133945	0.535393	0.956359	1.80277	2.69735e-23	3.44892e-22
gene-LOC115705792	XP_030489095.1	1	pentatricopeptide repeat-containing protein At3g49740	AT3G01820.1	58.54	P-loop containing nucleoside triphosphate hydrolases superfamily protein		1.97572	1.57273	2.00971	2.32596	3.85561	-0.318357	0.551446	0.87901	0.161579	0.748781	0.834439	-0.0984928	0.857937	0.99684	0.95228	0.0491025	0.0817934
gene-LOC115705765	XP_030489062.2	1	uncharacterized LOC115705765	AT3G11470.8	23.29	4'-phosphopantetheinyl transferase superfamily;start_range=.,3610666		0.833185	1.11778	1.18579	1.54304	1.40924	0.365599	0.62591	0.905786	0.810723	0.247086	0.37792	0.447881	0.565955	0.96639	0.690659	0.379199	0.472573
gene-LOC115705726	XP_030488998.2	1	uncharacterized LOC115705726	AT5G22450.3	35.01	spectrin beta chain%2C brain		9.18511	8.46335	7.69676	8.78824	15.8235	-0.138743	0.415644	0.806525	-0.0958886	0.554353	0.681085	-0.276594	0.231863	0.79736	0.75342	0.000148668	0.000404683
gene-LOC115705770	XP_030489068.1	1	ACT domain-containing protein ACR12	AT5G04740.1	68.95	ACT domain-containing protein		48.3106	71.5587	73.1263	65.6029	68.046	0.558879	0.000441341	0.00909989	0.414558	0.00447442	0.0135766	0.587159	0.00582657	0.0978223	0.480064	0.00862657	0.0171462
gene-LOC115705791	XP_030489094.2	1	germin-like protein subfamily 3 member 2	AT3G10080.1	58.29	RmlC-like cupins superfamily protein		7.32986	9.949	9.01659	12.757	7.97086	0.43157	0.129161	0.492996	0.77479	0.00453845	0.0137276	0.289354	0.381637	0.898189	0.103862	0.759516	0.817142
gene-LOC115705755	XP_030489043.2	1	protein trichome birefringence-like 36	AT3G54260.1	63.98	TRICHOME BIREFRINGENCE-LIKE 36		33.3336	57.8368	71.2518	63.3464	29.5553	0.786255	2.99532e-06	0.00012923	0.900573	1.13085e-08	1.06787e-07	1.08379	1.08458e-06	6.89734e-05	-0.190323	0.339893	0.431678
gene-LOC115705731	XP_030489011.2	1	uncharacterized LOC115705731	AT1G30240.2	49.78	proline-%2C glutamic acid/leucine-rich protein		8.07226	7.80992	9.06583	8.65141	10.318	-0.0569587	0.781412	0.950998	0.0776941	0.68955	0.791214	0.158117	0.518033	0.954323	0.338647	0.140459	0.205135
gene-LOC115705753	XP_030489040.2	1	diphosphomevalonate decarboxylase MVD2, peroxisomal	AT3G54250.1	82.49	GHMP kinase family protein		31.5656	31.356	34.581	32.5992	17.4332	-0.0167881	0.919006	0.982713	0.0210541	0.89053	0.933637	0.120525	0.569959	0.96639	-0.870582	1.88189e-05	5.85506e-05
gene-LOC115705759	XP_030489048.2	1	uncharacterized LOC115705759	AT2G36290.2	62.93	alpha/beta-Hydrolases superfamily protein		22.0143	30.9716	27.8932	29.2109	15.2343	0.486868	0.00656738	0.0723231	0.393728	0.0198249	0.0491057	0.32548	0.15297	0.686503	-0.547321	0.0148588	0.0280614
gene-LOC115705762	XP_030489052.2	1	uncharacterized LOC115705762	AT2G36290.1	60	alpha/beta-Hydrolases superfamily protein		0.890962	8.31945	7.50979	32.5202	13.2088	3.20204	2.34741e-15	6.25342e-13	5.15201	3.99196e-62	9.57072e-60	3.0537	6.69317e-12	1.60531e-09	3.84693	1.52399e-20	1.68776e-19
gene-LOC115705757	XP_030489045.2	1	uncharacterized LOC115705757	AT2G36290.1	59.38	alpha/beta-Hydrolases superfamily protein		0.187031	0.29435	0.22465	5.54331	1.74582	0	1	1	4.8808	1.28321e-14	2.48607e-13	0	1	1	3.13399	0.000374222	0.00095876
gene-LOC115723426	XP_060969104.1	1	uncharacterized LOC115723426	AT2G36290.1	56.06	alpha/beta-Hydrolases superfamily protein		1.49008	2.9885	2.43147	4.54003	1.21991	1.00345	0.017369	0.143034	1.58497	3.01792e-05	0.000159949	0.688369	0.167356	0.708816	-0.281086	0.632362	0.710441
gene-LOC133036598	XP_060969109.1	1	uncharacterized LOC133036598	AT2G36290.1	64.62	alpha/beta-Hydrolases superfamily protein		11.0439	9.95779	7.75087	11.452	13.7625	-0.15688	0.490277	0.848068	0.0271087	0.900757	0.939722	-0.520864	0.0614677	0.445202	0.3022	0.226468	0.307019
gene-LOC133036601	XP_060969117.1	1	probable sodium/metabolite cotransporter BASS4, chloroplastic	AT3G56160.3	61.95	Sodium Bile acid symporter family		10.8201	13.8548	13.2095	7.82064	12.4992	0.350494	0.104794	0.441241	-0.495279	0.0343137	0.0780503	0.278443	0.284208	0.839378	0.194164	0.429243	0.522603
gene-LOC133036599	XP_060969112.1	1	probable aspartyl aminopeptidase	AT5G04710.1	78	Zn-dependent exopeptidases superfamily protein		14.6603	18.2696	16.8105	14.6598	13.8153	0.309866	0.100751	0.431794	-0.0240637	0.894662	0.936112	0.186655	0.490438	0.943702	-0.0984997	0.656397	0.730995
gene-LOC115705822	XP_060963690.1	1	uncharacterized LOC115705822	AT3G56680.1	38.94	Single-stranded nucleic acid binding R3H protein		44.3788	37.6748	36.6678	56.1953	66.7827	-0.24575	0.105462	0.4429	0.31665	0.0176352	0.0443758	-0.287141	0.169972	0.713534	0.572882	0.00199165	0.00446535
gene-LOC115705824	XP_030489127.2	1	uncharacterized LOC115705824	AT3G56680.1	36.34	Single-stranded nucleic acid binding R3H protein		69.5033	68.4916	66.0116	57.5971	90.3347	-0.0312884	0.827054	0.963465	-0.294376	0.0170375	0.0431296	-0.086379	0.682876	0.980067	0.360938	0.0483883	0.0807386
gene-LOC115706554	XP_030490103.2	1	nifU-like protein 4, mitochondrial	AT3G20970.1	77.87	NFU domain protein 4		25.491	29.1137	31.3753	36.3728	33.3535	0.18393	0.321055	0.741062	0.485117	0.00406126	0.0124832	0.289185	0.218786	0.783405	0.373379	0.0813735	0.127738
gene-LOC115707307	XP_030491081.2	1	uncharacterized LOC115707307	AT5G42210.1	37.98	Major facilitator superfamily protein		13.9832	8.1447	8.83727	7.38235	2.84847	-0.78741	0.000112898	0.00295136	-0.945422	1.57212e-06	1.05267e-05	-0.671542	0.00770688	0.119696	-2.31671	2.36862e-16	2.03257e-15
gene-LOC115704423	XP_030487488.2	1	organelle RRM domain-containing protein 1, chloroplastic	AT3G20930.1	66.23	RNA-binding (RRM/RBD/RNP motifs) family protein		10.5294	13.1524	13.1987	8.04548	4.80519	0.314427	0.137871	0.512264	-0.410529	0.0674425	0.135782	0.319155	0.220422	0.783405	-1.1467	5.60294e-05	0.000162547
gene-LOC115706151	XP_030489548.2	1	protein SUPPRESSOR OF K(+) TRANSPORT GROWTH DEFECT 1	AT2G27600.1	79.13	AAA-type ATPase family protein		8.7744	7.4924	7.62022	17.3011	13.4948	-0.234185	0.306745	0.726825	0.954702	9.09488e-07	6.33047e-06	-0.213932	0.442623	0.931051	0.609529	0.0133763	0.0254863
gene-LOC115705085	XP_060963713.1	1	GDSL esterase/lipase At5g03610	AT5G03610.1	50.75	GDSL-like Lipase/Acylhydrolase superfamily protein		0.0426294	0.0431144	0.0749775	0.122836	0.285111	0	1	1	0	1	1	0	1	1	0	1	1
gene-LOC115704444	XP_030487512.2	1	stemmadenine O-acetyltransferase	AT3G26040.1	30.37	HXXXD-type acyl-transferase family protein;start_range=.,9519741		5.78701	10.6304	9.64475	24.489	7.6758	0.867046	0.000294256	0.00648097	2.05437	6.19707e-24	2.47625e-22	0.724439	0.0131885	0.1738	0.389704	0.18226	0.2554
gene-LOC115704867	XP_030487935.2	1	uncharacterized LOC115704867	AT3G09140.2	30.32	hypothetical protein (DUF674)		0.0369756	0	0.129381	0.518512	0.593191	0	1	1	0	1	1	0	1	1	0	1	1
gene-LOC115706148	XP_030489546.2	1	copper transport protein ATX1	AT3G56240.3	59.5	copper chaperone		175.011	213.29	193.912	326.433	290.146	0.281797	0.0626334	0.328076	0.867126	4.0495e-11	5.35816e-10	0.137196	0.496274	0.945737	0.71988	6.01018e-05	0.000173548
gene-LOC115706147	XP_030489545.2	1	IQ domain-containing protein IQM3	AT3G52870.1	60.29	IQ calmodulin-binding motif family protein		7.50586	5.26483	5.28684	7.34885	4.24087	-0.516968	0.0309563	0.211109	-0.0565605	0.796693	0.869367	-0.516378	0.0606509	0.443266	-0.83663	0.00218737	0.00487072
gene-LOC115706693	XP_030490269.2	1	uncharacterized LOC115706693	AT3G21510.1	25.37	histidine-containing phosphotransmitter 1		1.11383	0.938897	1.57205	0.943369	1.74449	-0.25451	0.747324	0.942396	-0.265681	0.738351	0.827141	0.515539	0.4673	0.941017	0.627481	0.402152	0.495398
gene-LOC115706143	XP_030489539.2	1	serine/threonine-protein kinase D6PKL1	AT3G44610.1	70.99	Protein kinase superfamily protein		33.1024	23.1166	21.8815	31.0889	15.1701	-0.529042	0.0109654	0.104564	-0.117864	0.547184	0.675837	-0.612093	0.0185085	0.217909	-1.14279	1.5652e-06	5.60066e-06
gene-LOC115706142	XP_030489538.1	1	neutral/alkaline invertase 3, chloroplastic	AT5G22510.2	68.85	alkaline/neutral invertase		19.7694	14.2065	14.3571	16.5518	10.968	-0.484705	0.00398288	0.0500335	-0.279019	0.0743988	0.146908	-0.471316	0.0360548	0.33017	-0.863511	1.70012e-05	5.33391e-05
gene-LOC115706141	XP_030489537.2	1	uncharacterized LOC115706141	AT5G04670.2	40.41	Enhancer of polycomb-like transcription factor protein		21.1103	17.8693	19.8999	16.557	34.7572	-0.245159	0.0901683	0.405927	-0.368654	0.0083937	0.0235329	-0.0948799	0.630105	0.975291	0.699649	0.000349747	0.000900811
gene-LOC115707792	XP_030491722.1	1	small ribosomal subunit protein uS14m	AT2G34520.1	61.47	mitochondrial ribosomal protein S14		34.554	39.4855	45.7686	32.2843	56.2618	0.184698	0.350361	0.764272	-0.132498	0.511247	0.64436	0.39144	0.100911	0.568685	0.690382	0.0025153	0.00554522
gene-LOC133033856	XP_060964880.1	1	secreted RxLR effector protein 161-like	AT4G23160.3	38.3	cysteine-rich RECEPTOR-like kinase;start_range=.,12131325		0	0	0	0	0	0	1	1	0	1	1	0	1	1	0	1	1
gene-LOC115706138	XP_030489534.2	1	uncharacterized LOC115706138	AT3G22430.1	36.26	RNA recognition motif XS domain protein		12.0161	10.7678	12.1487	11.7995	18.9814	-0.165511	0.321536	0.741601	-0.0475183	0.754243	0.838577	0.00682563	0.974354	0.999496	0.644116	0.00081912	0.00197301
gene-LOC115706725	XP_030490306.1	1	DNA-directed RNA polymerases II and V subunit 8A	AT1G54250.1	67.38	RNA polymerase Rpb8		80.6654	91.2352	96.774	87.2091	95.4019	0.165295	0.313032	0.733529	0.0838591	0.566455	0.69128	0.248644	0.246613	0.810846	0.225206	0.230223	0.311476
gene-LOC115706122	XP_030489516.2	1	uncharacterized LOC115706122	AT3G52900.1	56.47	RAB6-interacting golgin (DUF662)		5.26257	6.21741	7.31808	6.09421	5.90801	0.224523	0.54764	0.876375	0.175731	0.636949	0.750667	0.45716	0.235378	0.799945	0.152321	0.71911	0.784436
gene-LOC115706121	XP_030489515.2	1	protein GLUTELIN PRECURSOR ACCUMULATION 3	AT2G36360.3	68.18	Galactose oxidase/kelch repeat superfamily protein;start_range=.,15243744		18.1416	14.9117	14.6125	18.4598	15.9188	-0.291344	0.128426	0.491302	-0.000133738	0.999386	0.999444	-0.323279	0.167171	0.708387	-0.203129	0.350469	0.4429
gene-LOC115706120	XP_030489514.2	1	uncharacterized LOC115706120	AT3G52240.1	33.22	transcriptional regulator ATRX		13.9956	11.0016	10.1232	20.4605	19.0102	-0.356337	0.0562546	0.30819	0.520519	0.0016224	0.00560117	-0.47549	0.0437688	0.373202	0.426779	0.0381599	0.0653421
gene-LOC115704441	XP_030487510.2	1	zinc finger protein BRUTUS	AT3G18290.1	52.29	zinc finger protein-like protein		0.119769	0.279556	0.220385	0.824207	1.76259	0	1	1	2.72552	4.06777e-05	0.000208981	0	1	1	3.82168	7.56605e-11	4.30101e-10
gene-LOC115704440	XP_030487509.2	1	uncharacterized LOC115704440	AT2G38790.1	34.02	hypothetical protein		0	0	0	0	0.0820555	0	1	1	0	1	1	0	1	1	0	1	1
gene-LOC115706169	XP_030489573.2	1	putative RING-H2 finger protein ATL71	AT4G40070.1	38.1	RING/U-box superfamily protein		30.0611	34.7199	33.2161	30.4116	43.3064	0.19978	0.25311	0.671464	-0.0101514	0.951818	0.97077	0.131582	0.561144	0.965903	0.511168	0.0114948	0.0222173
gene-LOC133033858	XP_060964883.1	1	uncharacterized LOC133033858	AT4G29090.1	28.9	Ribonuclease H-like superfamily protein;start_range=.,14333528		0	0	0	0	0	0	1	1	0	1	1	0	1	1	0	1	1
gene-LOC115706117	XP_030489510.2	1	cytochrome P450 77A3	AT5G04660.1	67.52	cytochrome P450%2C family 77%2C subfamily A%2C polypeptide 4		49.4324	34.4143	33.3518	58.7315	29.1952	-0.533872	0.0104069	0.100922	0.220196	0.566922	0.691605	-0.582105	0.0223742	0.245356	-0.77687	0.000876422	0.00209948
gene-LOC115705039	XP_030488138.2	1	trihelix transcription factor PTL	AT5G03680.1	41.77	Duplicated homeodomain-like superfamily protein	PK26797.1	0.834797	1.38255	1.06534	1.407	1.09807	0.718074	0.178062	0.576025	0.739091	0.16556	0.277601	0.351962	0.553809	0.96417	0.395472	0.559821	0.646278
gene-LOC115704438	XP_030487506.1	1	phenylacetaldehyde oxime monooxygenase CYP71AN24-like	AT1G11610.1	39.18	cytochrome P450%2C family 71%2C subfamily A%2C polypeptide 18		0	0	0	0	0	0	1	1	0	1	1	0	1	1	0	1	1
gene-LOC115706114	XP_030489501.2	1	transcriptional activator DEMETER	AT5G04560.3	54.01	HhH-GPD base excision DNA repair family protein		15.6144	15.3935	14.3825	17.3829	12.3942	-0.0297165	0.842049	0.967322	0.136099	0.295941	0.433588	-0.135182	0.503938	0.948601	-0.350366	0.064758	0.104479
gene-LOC115706115	XP_030489506.2	1	uncharacterized LOC115706115	AT3G30200.1	22.7	Plant transposase (Ptta/En/Spm family);start_range=.,11827752		20.0731	12.6261	10.7757	14.982	35.083	-0.679452	7.51511e-05	0.00210561	-0.449471	0.00610716	0.0178107	-0.910672	5.75755e-05	0.00226909	0.783373	1.56782e-05	4.95171e-05
gene-LOC115706236	XP_030489674.2	1	serine/threonine-protein kinase CTR1	AT5G03730.2	53.34	Protein kinase superfamily protein		7.66423	7.24163	6.56727	12.1979	6.4059	-0.0847064	0.693241	0.927334	0.65736	0.000514122	0.0020327	-0.223213	0.397935	0.906487	-0.255645	0.309891	0.400194
gene-LOC115707020	XP_030490684.1	1	uncharacterized RNA-binding protein C1827.05c	AT5G04600.1	57.43	RNA-binding (RRM/RBD/RNP motifs) family protein		178.911	156.428	172.415	245.255	208.692	-0.197834	0.204169	0.612216	0.42714	0.00129603	0.00459479	-0.0620762	0.790849	0.993364	0.211666	0.264603	0.351186
gene-LOC115706263	XP_030489711.1	1	uncharacterized LOC115706263	AT3G57810.4	57.14	Cysteine proteinases superfamily protein		19.6871	19.097	17.7627	28.4792	54.9674	-0.0516013	0.793484	0.955583	0.506104	0.00414589	0.0127003	-0.161767	0.507589	0.949727	1.46664	4.68497e-13	3.18819e-12
gene-LOC133033861	XP_060964900.1	1	uncharacterized LOC133033861	AT3G24255.3	30.77	RNA-directed DNA polymerase (reverse transcriptase)-related family protein		0	0	0	0	0	0	1	1	0	1	1	0	1	1	0	1	1
gene-LOC115707173	XP_030490903.1	1	thymidylate kinase	AT5G59440.3	63.86	P-loop containing nucleoside triphosphate hydrolases superfamily protein		16.6176	18.4611	20.8387	13.6373	13.2522	0.123847	0.561748	0.883772	-0.248034	0.25801	0.390661	0.319671	0.229565	0.794932	-0.395408	0.163468	0.23302
gene-LOC115706108	XP_030489494.1	1	glucomannan 4-beta-mannosyltransferase 9	AT5G03760.1	78.05	Nucleotide-diphospho-sugar transferases superfamily protein		20.6026	18.9714	15.5339	3.68088	5.90941	-0.130032	0.542594	0.873679	-2.51318	8.57076e-27	4.13264e-25	-0.422495	0.13406	0.650005	-1.82257	9.37496e-11	5.2808e-10
gene-LOC115706671	XP_030490245.1	1	uncharacterized LOC115706671	AT2G28600.1	47.21	P-loop containing nucleoside triphosphate hydrolases superfamily protein		20.8383	19.0125	22.065	17.8999	27.691	-0.141912	0.462129	0.832626	-0.243766	0.191065	0.31062	0.0681224	0.773729	0.992333	0.392437	0.0847754	0.132384
gene-LOC115704937	XP_030488016.2	1	GABA transporter 1	AT1G08230.2	57.81	Transmembrane amino acid transporter family protein		0.0845868	0.0580835	0.19743	0.56597	0.20728	0	1	1	2.8875	0.0153209	0.0394066	0	1	1	0	1	1
gene-LOC115706105	XP_030489490.2	1	protein PSK SIMULATOR 2	AT5G04550.2	56.66	type-1 restriction enzyme mjaxp r protein (DUF668)		15.0767	14.0487	14.8618	23.7349	12.8206	-0.111216	0.521733	0.862911	0.631944	3.26727e-05	0.000171427	-0.0333307	0.886022	0.996876	-0.248925	0.251889	0.336928
gene-LOC115706104	XP_030489489.2	1	phosphatidylinositol-3-phosphatase myotubularin-1	AT3G10550.1	70.71	Myotubularin-like phosphatases II superfamily		8.66504	10.2307	9.84844	9.47555	60.9916	0.231511	0.24329	0.660487	0.105359	0.582047	0.704233	0.172961	0.4856	0.943183	2.79865	1.12112e-42	2.95975e-41
gene-LOC115708293	XP_060964028.1	1	putative disease resistance protein At1g50180	AT1G53350.1	31.58	Disease resistance protein (CC-NBS-LRR class) family		0.300346	0.451574	0.296187	0.752084	0.317951	0.611268	0.373974	0.779484	1.32183	0.0325005	0.0746043	0	1	1	0	1	1
gene-LOC133033345	XP_060964039.1	1	uncharacterized LOC133033345					0.0582095	0	0	0	0.130255	0	1	1	0	1	1	0	1	1	0	1	1
gene-LOC115710729	XP_060964912.1	1	uncharacterized LOC115710729	AT3G05850.1	26.32	MuDR family transposase		0	0.0389312	0	0	0	0	1	1	0	1	1	0	1	1	0	1	1
gene-LOC115706858	XP_030490477.2	1	uncharacterized LOC115706858	AT3G52230.1	40	hypothetical protein		30.2351	38.7541	46.4694	27.4981	33.5391	0.35102	0.0754721	0.365383	-0.167121	0.407106	0.546927	0.607035	0.0105493	0.147716	0.135433	0.557088	0.643845
gene-LOC115706460	XP_030489974.1	1	pyruvate kinase 1, cytosolic	AT3G52990.1	82.92	Pyruvate kinase family protein		20.5631	26.571	28.8356	25.4554	14.3037	0.365518	0.0448599	0.269494	0.288484	0.0979845	0.18391	0.453454	0.0474326	0.390366	-0.542812	0.0141951	0.0269207
gene-LOC115706097	XP_030489480.2	1	LRR receptor-like serine/threonine-protein kinase GSO1	AT4G20140.1	66.01	Leucine-rich repeat transmembrane protein kinase		3.07796	3.34291	3.18822	6.64669	12.17	0.10896	0.659126	0.918671	1.08791	4.0759e-07	3.00548e-06	0.0373356	0.897295	0.997212	1.96597	4.79378e-14	3.51114e-13
gene-LOC115706094	XP_030489477.2	1	mRNA cap guanine-N7 methyltransferase 2	AT3G52210.1	62.57	S-adenosyl-L-methionine-dependent methyltransferases superfamily protein		10.0695	10.2171	9.5664	8.70481	10.2493	0.0116765	0.961937	0.991445	-0.237538	0.347359	0.487489	-0.0827734	0.772367	0.992333	0.011227	0.967622	0.977038
gene-LOC115706095	XP_030489478.2	1	uncharacterized LOC115706095	AT5G04520.1	79.66	3-oxoacyl-acyl-carrier synthase-like protein (Protein of unknown function DUF455)		12.4042	12.2515	14.0366	11.384	7.75927	-0.0286832	0.904854	0.981125	-0.151895	0.523461	0.655257	0.167662	0.567544	0.96639	-0.695527	0.0174248	0.0323585
gene-LOC115706093	XP_030489476.2	1	dihydrolipoyllysine-residue acetyltransferase component 1 of pyruvate dehydrogenase complex, mitochondrial	AT3G52200.1	62.67	Dihydrolipoamide acetyltransferase%2C long form protein		22.7699	24.1003	24.5759	25.9344	30.3927	0.0725094	0.685618	0.925452	0.161729	0.338534	0.478644	0.0967076	0.672578	0.9793	0.400762	0.0460796	0.0772888
gene-LOC115706096	XP_030489479.2	1	uncharacterized LOC115706096	AT5G47830.1	63.95	hypothetical protein		5.41938	5.0882	5.9936	8.52989	8.6356	-0.0978423	0.777749	0.950936	0.621279	0.0588719	0.121663	0.133475	0.718787	0.98515	0.655426	0.0608907	0.0988524
gene-LOC115704430	XP_060964027.1	1	metalloendoproteinase 5-MMP-like	AT1G59970.1	40.76	Matrixin family protein		0	0	0	0	0	0	1	1	0	1	1	0	1	1	0	1	1
gene-LOC115706088	XP_030489465.2	1	GRIP and coiled-coil domain-containing protein C27D7.02c	AT1G33500.3	47.16	tropomyosin		1.70802	1.77185	1.79015	2.81182	20.4729	0.0152331	0.976814	0.995378	0.730588	0.124394	0.221968	0.078496	0.889851	0.996876	3.61421	1.37383e-20	1.52618e-19
gene-LOC115706087	XP_030489464.1	1	phenylacetaldehyde reductase	AT5G19440.1	68.31	NAD(P)-binding Rossmann-fold superfamily protein		25.5621	36.29	35.2735	39.0335	21.5162	0.499939	0.00688947	0.0749844	0.583519	0.000734997	0.00278724	0.45534	0.0487153	0.396261	-0.260847	0.296157	0.385653
gene-LOC115704429	XP_030487495.2	1	uncharacterized LOC115704429	AT4G04650.1	23.39	RNA-directed DNA polymerase (reverse transcriptase)-related family protein;start_range=.,2353989		0	0.0574115	0	0.0470942	0.0630645	0	1	1	0	1	1	0	1	1	0	1	1
gene-LOC115708341	XP_030492443.2	1	stemmadenine O-acetyltransferase-like	AT3G26040.1	30.92	HXXXD-type acyl-transferase family protein;start_range=.,9519741		0.0218417	0.216354	0.212254	10.1398	0.683061	0	1	1	8.83429	1.77853e-09	1.88004e-08	0	1	1	0	1	1
gene-LOC133033409	XP_060964108.1	1	stemmadenine O-acetyltransferase-like	AT3G26040.1	30.48	HXXXD-type acyl-transferase family protein;start_range=.,9519741		0.058083	0	0	1.14882	0.0326214	0	1	1	4.30128	0.00145728	0.0050984	0	1	1	0	1	1
gene-LOC115703615	XP_030486712.2	1	bark storage protein A	AT4G24350.1	58.9	Phosphorylase superfamily protein		4.94444	5.07958	5.26539	16.2481	3.74613	0.0270591	0.932578	0.984409	1.69017	5.48055e-11	7.10249e-10	0.0741655	0.834477	0.995797	-0.412951	0.28484	0.373926
gene-LOC133033901	XP_060964958.1	1	uncharacterized LOC133033901					0	0	0	0	0	0	1	1	0	1	1	0	1	1	0	1	1
gene-LOC115706067	XP_030489446.1	1	3-phosphoinositide-dependent protein kinase 2	AT5G04510.1	81.33	3'-phosphoinositide-dependent protein kinase 1		19.7347	22.4224	21.7156	30.1684	19.6758	0.17523	0.339363	0.755167	0.586758	0.000417489	0.00168854	0.125613	0.590108	0.968773	-0.0209432	0.925585	0.946516
gene-LOC115706066	XP_060964123.1	1	uncharacterized LOC115706066					18.9091	18.5709	19.9623	13.9639	14.3097	-0.0290476	0.884339	0.978065	-0.465942	0.0257796	0.0613499	0.0577982	0.81815	0.995721	-0.461284	0.0555192	0.0911793
gene-LOC133033457	XP_060964166.1	1	uncharacterized LOC133033457					7.67342	6.71385	7.06273	8.5335	12.7472	-0.180836	0.512075	0.859587	0.147307	0.572432	0.695917	-0.131283	0.673066	0.9793	0.681134	0.0134802	0.0256706
gene-LOC133033445	XP_060964158.1	1	zingipain-2-like	AT3G45310.1	27.42	Cysteine proteinases superfamily protein		5.3362	13.9678	15.8616	37.6681	36.1662	1.26671	1.22307e-05	0.000451138	2.66508	1.35917e-30	8.29047e-29	1.44091	3.39359e-05	0.00144241	2.69735	1.83534e-22	2.27542e-21
gene-LOC115704872	XP_060964165.1	1	uncharacterized LOC115704872					7.22518	9.25629	7.89914	12.7721	10.714	0.347129	0.250559	0.668853	0.78891	0.00486558	0.0145923	0.112397	0.747	0.989272	0.550975	0.106814	0.161844
gene-LOC115706047	XP_030489408.2	1	glucosamine inositolphosphorylceramide transferase 1	AT5G04500.1	63.77	glycosyltransferase family protein 47		10.4601	10.7561	11.7868	14.5282	22.4917	0.0313925	0.863228	0.972036	0.4489	0.00676866	0.0194832	0.160272	0.493199	0.944098	1.08785	8.22917e-08	3.43958e-07
gene-LOC115704057	XP_030487139.2	1	probable phytol kinase 1, chloroplastic	AT5G04490.1	65.7	phytol kinase 1 VTE5		16.593	9.99048	9.54873	4.17426	8.30824	-0.733765	0.00154464	0.0246188	-2.01263	8.93931e-15	1.75353e-13	-0.802496	0.00438102	0.0785821	-1.00751	0.000207658	0.00055499
gene-LOC115707553	XP_030491422.1	1	SEC12-like protein 1	AT3G52190.1	59.42	phosphate transporter traffic facilitator1		9.69564	9.6766	10.6874	8.98137	15.2453	-0.00994745	0.961155	0.991445	-0.134019	0.501984	0.636215	0.130168	0.595133	0.968773	0.640767	0.00997475	0.0195296
gene-LOC115706043	XP_030489405.2	1	phosphoglucan phosphatase DSP4, amyloplastic	AT3G52180.1	62.93	dual specificity protein phosphatase (DsPTP1) family protein		41.3426	42.5351	35.6822	30.8675	17.723	0.0348343	0.834512	0.96524	-0.444907	0.00446096	0.0135488	-0.221459	0.339639	0.874485	-1.23519	2.59172e-09	1.27194e-08
gene-LOC115706042	XP_030489404.2	1	tubulin-folding cofactor E	AT1G71440.1	64.94	tubulin folding cofactor E / Pfifferling (PFI)		16.8201	18.8214	18.906	18.1643	12.3821	0.155316	0.388855	0.790091	0.0860756	0.618244	0.735299	0.158831	0.482767	0.943183	-0.455683	0.0380056	0.0651027
gene-LOC115706041	XP_030489402.2	1	uncharacterized LOC115706041	AT5G04480.1	63.06	UDP-Glycosyltransferase superfamily protein		7.73501	5.86851	5.84013	7.56547	11.882	-0.398441	0.0376705	0.240167	-0.05366	0.770822	0.850382	-0.413602	0.0858308	0.530353	0.603256	0.00484856	0.010127
gene-LOC115706242	XP_030489684.2	1	uncharacterized LOC115706242	AT3G14160.1	55.62	2-oxoglutarate-dependent dioxygenase family protein		11.9428	13.157	13.4316	14.9247	110.447	0.137353	0.471133	0.838139	0.295407	0.0980213	0.183938	0.156074	0.50418	0.948601	3.18318	1.46902e-62	6.62609e-61
gene-LOC115706231	XP_030489668.2	1	uncharacterized LOC115706231	AT3G52170.2	32.37	DNA binding protein		36.242	34.1697	35.7196	41.4036	33.4209	-0.0919958	0.562239	0.884089	0.166729	0.242459	0.372791	-0.0313796	0.881124	0.996876	-0.132244	0.479351	0.571023
gene-LOC115706591	XP_030490148.1	1	uncharacterized LOC115706591					21.7138	21.1763	18.2381	39.2506	93.921	-0.048065	0.83987	0.966707	0.822572	6.57456e-05	0.000322232	-0.26613	0.356783	0.881015	2.09802	7.95479e-21	8.98706e-20
gene-LOC115707499	XP_030491352.2	1	protein EMBRYO DEFECTIVE 514	AT5G62440.1	63.83	EMB514 (DUF3223)		64.6767	64.2878	71.9514	65.0026	66.2084	-0.0147355	0.926937	0.983991	-0.0215161	0.884735	0.929594	0.142937	0.5062	0.94956	0.0207752	0.912114	0.936529
gene-LOC115706543	XP_030490082.1	1	non-symbiotic hemoglobin 2	AT3G10520.1	75.66	hemoglobin 2		7.82265	11.9713	6.58312	3.11862	1.64837	0.619425	0.0965903	0.421935	-1.36152	0.0067035	0.0193214	-0.247841	0.641287	0.976217	-2.2529	0.000115787	0.000320525
gene-LOC115706034	XP_030489395.2	1	probable 2-oxoglutarate-dependent dioxygenase SLC1	AT2G36690.2	58.77	2-oxoglutarate (2OG) and Fe(II)-dependent oxygenase superfamily protein		0.0239883	0.127349	0.100925	0.106056	0.624761	0	1	1	0	1	1	0	1	1	0	1	1
gene-LOC115706033	XP_030489394.2	1	uncharacterized LOC115706033	AT5G04460.6	63.66	RING/U-box superfamily protein;start_range=.,1260009		10.5352	10.6002	11.6889	9.62957	22.3154	0.00221922	0.990198	0.998337	-0.150765	0.38836	0.529114	0.140807	0.531698	0.956359	1.06814	5.90015e-08	2.50756e-07
gene-LOC115706030	XP_030489390.2	1	uncharacterized LOC115706030	AT1G29320.1	60.84	Transducin/WD40 repeat-like superfamily protein		23.5851	21.3493	23.3128	18.1615	20.0045	-0.15192	0.381759	0.78459	-0.401758	0.0167111	0.0423718	-0.0278754	0.90697	0.997278	-0.250472	0.272102	0.35965
gene-LOC115706031	XP_030489391.1	1	mitochondrial pyruvate carrier 1	AT5G20090.4	87.62	Uncharacterized protein family (UPF0041)		68.6365	79.4407	81.8441	73.2829	105.686	0.200736	0.268671	0.688203	0.0586021	0.734529	0.824219	0.237609	0.348005	0.876254	0.607208	0.00326987	0.0070588
gene-LOC115703930	XP_030487022.1	1	uncharacterized LOC115703930	AT5G04440.1	77	RAP release 2%2C galactose-binding-like domain protein%2C putative (DUF1997)		11.2322	13.4534	10.0097	6.70765	5.8218	0.259102	0.331172	0.74929	-0.769623	0.00951023	0.0262455	-0.172629	0.627582	0.974261	-0.955068	0.00500669	0.010433
gene-LOC115706026	XP_030489384.1	1	protein BTR1	AT5G04430.2	71.08	binding to TOMV RNA 1L (long form)		43.6608	48.6048	49.0607	40.0665	41.3854	0.139378	0.363648	0.772742	-0.155001	0.279921	0.41596	0.149603	0.476235	0.942294	-0.100065	0.592734	0.675175
gene-LOC115704424	XP_060964168.1	1	putative glycine-rich cell wall structural protein 1					9.82947	9.71287	8.01216	4.65851	2.76883	-0.0248494	0.931136	0.984409	-1.09426	0.00166526	0.00572968	-0.305432	0.468617	0.941066	-1.85048	8.38661e-06	2.74788e-05
gene-LOC133033936	XP_060964975.1	1	uncharacterized LOC133033936	AT4G29090.1	20.49	Ribonuclease H-like superfamily protein;start_range=.,14333528		0	0	0	0.0453628	0	0	1	1	0	1	1	0	1	1	0	1	1
gene-LOC115706024	XP_030489381.2	1	acyl-CoA-binding domain-containing protein 4	AT5G04420.3	63.17	Galactose oxidase/kelch repeat superfamily protein		19.2006	19.0494	17.8086	19.1637	18.3166	-0.01741	0.920762	0.982713	-0.0252208	0.877621	0.925104	-0.11758	0.598533	0.969285	-0.0806868	0.703246	0.771396
gene-LOC115706003	XP_030489356.2	1	probable CoA ligase CCL5	AT1G20510.1	45.96	OPC-8:0 CoA ligase1		1.04791	1.14671	1.07366	1.22597	1.63748	0.110918	0.823965	0.963132	0.189098	0.711526	0.807997	0.0283935	0.96187	0.999246	0.62871	0.213789	0.292771
gene-LOC115702939	XP_030486270.2	1	uncharacterized LOC115702939	AT5G63920.1	46.34	topoisomerase 3alpha		3.59633	1.43731	0.963151	3.48759	0.485013	-1.2984	0.0782361	0.373966	-0.0803563	0.895205	0.936263	-1.92407	0.018598	0.218707	-3.04358	0.00264007	0.00579465
gene-LOC115724609	XP_030509786.1	1	uncharacterized LOC115724609	AT3G05850.1	36.2	MuDR family transposase		0.381488	0.275374	0.229236	0.508232	0.209873	-0.482034	0.441543	0.821806	0.38694	0.493645	0.628924	-0.774537	0.26214	0.824017	-0.899615	0.238568	0.321313
gene-LOC115706014	XP_030489368.1	1	malate dehydrogenase [NADP], chloroplastic	AT5G58330.2	82.78	lactate/malate dehydrogenase family protein		133.637	120.708	105.16	118.258	43.8394	-0.154465	0.252499	0.670891	-0.201045	0.0863694	0.165878	-0.356366	0.0617442	0.446199	-1.62297	9.66612e-23	1.21177e-21
gene-LOC115706004	XP_030489357.2	1	NAC domain-containing protein 53	AT5G04410.1	46.69	NAC domain containing protein 2	PK11467.1	25.6036	26.045	28.6037	34.7263	35.3165	0.0167483	0.913972	0.982713	0.415383	0.0026117	0.00850591	0.148627	0.471608	0.941081	0.44845	0.01244	0.0238669
gene-LOC115706009	XP_030489363.2	1	NAC domain containing protein 50	AT3G10490.2	46.6	NAC domain containing protein 52	PK06477.1	59.4305	48.2848	55.0696	84.0309	48.5674	-0.308311	0.0340093	0.224539	0.476333	0.000298494	0.00125093	-0.123287	0.532865	0.956359	-0.305457	0.0853347	0.133107
gene-LOC115706019	XP_030489375.2	1	ras-related protein RABC2a	AT5G03530.2	71.23	RAB GTPase homolog C2A		5.0761	8.23764	8.10239	13.4954	4.97445	0.687185	0.0192903	0.153228	1.38334	1.32699e-07	1.06147e-06	0.661673	0.0467745	0.38761	-0.0383373	0.917566	0.940782
gene-LOC133033463	XP_060964171.1	1	peroxidase 15-like	AT3G49120.1	56.92	peroxidase CB		0	0	0	0	0	0	1	1	0	1	1	0	1	1	0	1	1
gene-LOC115706020	XP_030489378.1	1	photosynthetic NDH subunit of subcomplex B 4, chloroplastic	AT1G18730.3	59.36	NDH dependent flow 6		120.246	170.877	123.018	79.9402	48.2752	0.504269	0.00572983	0.0652949	-0.613922	0.000526674	0.00207757	0.0262439	0.910033	0.997278	-1.32461	2.62534e-09	1.28771e-08
gene-LOC115706005	XP_030489359.2	1	monocopper oxidase-like protein SKU5	AT4G12420.2	50.57	Cupredoxin superfamily protein		0.153996	0.217937	0.241893	0.274927	0.487824	0	1	1	0	1	1	0	1	1	0	1	1
gene-LOC115706002	XP_030489355.2	1	monocopper oxidase-like protein SKS1	AT5G48450.1	47.9	SKU5 similar 3;start_range=.,19632791		0.3374	0.36075	0.53351	0.340561	14.0752	0	1	1	0	1	1	0	1	1	5.35084	8.36595e-28	1.2947e-26
gene-LOC115706021	XP_030489379.2	1	uncharacterized LOC115706021	AT1G63060.1	44.87	ribosome biogenesis NEP1-like protein		0	0	0	0	4.16207	0	1	1	0	1	1	0	1	1	0	1	1
gene-LOC115706012	XP_030489366.2	1	uncharacterized LOC115706012	AT4G12070.1	62.75	hypothetical protein		4.74133	4.7287	4.43814	8.79067	8.34906	-0.0186343	0.950865	0.989526	0.859409	0.00134411	0.00474478	-0.113854	0.738876	0.987657	0.7918	0.0109963	0.0213274
gene-LOC115706015	XP_030489371.1	1	ubiquitin carboxyl-terminal hydrolase 2	AT1G65650.1	78.38	Peptidase C12%2C ubiquitin carboxyl-terminal hydrolase 1		35.9228	39.051	43.0148	39.6385	27.4602	0.110722	0.504237	0.856176	0.115407	0.466148	0.604511	0.246468	0.25863	0.818809	-0.395889	0.0476856	0.079707
gene-LOC115706013	XP_030489367.2	1	zinc finger protein ZAT5-like	AT5G04390.1	35.6	C2H2-type zinc finger family protein	PK29015.1	0.541361	0.358722	0.361756	0.687588	4.43833	-0.610229	0.402776	0.797418	0.294789	0.65321	0.763177	-0.608985	0.426606	0.921545	3.0171	1.31666e-11	8.04517e-11
gene-LOC115706007	XP_060964983.1	1	pentatricopeptide repeat-containing protein At1g08070, chloroplastic	AT1G08070.1	36.38	Tetratricopeptide repeat (TPR)-like superfamily protein		1.88674	1.93873	2.3897	2.18879	1.69341	0.0389792	0.928619	0.983991	0.184002	0.671271	0.77721	0.327147	0.495104	0.945418	-0.162791	0.749948	0.809078
gene-LOC115716723	XP_060964985.1	1	retrovirus-related Pol polyprotein from transposon RE2	AT4G23160.3	43.71	cysteine-rich RECEPTOR-like kinase;start_range=.,12131325		0.0109514	0	0	0.00897405	0.024422	0	1	1	0	1	1	0	1	1	0	1	1
gene-LOC115705999	XP_030489353.2	1	pullulanase 1, chloroplastic	AT5G04360.2	68.61	limit dextrinase		9.21716	12.5213	11.346	11.0238	14.9512	0.433828	0.014497	0.126129	0.235306	0.181377	0.298269	0.288391	0.225572	0.789157	0.682466	0.000727444	0.00176713
gene-LOC115706018	XP_030489374.2	1	uncharacterized LOC115706018	AT5G22930.1	36.96	enabled-like protein (DUF1635)		5.0271	9.06765	10.0064	14.4938	13.0938	0.837479	0.00154163	0.0246188	1.50029	3.5063e-10	4.14276e-09	0.978395	0.00181939	0.0401918	1.36588	7.32113e-06	2.41909e-05
gene-LOC115706016	XP_030489372.2	1	SHUGOSHIN 2	AT5G04320.3	39.11	Shugoshin C terminus		35.1987	36.6761	40.081	25.998	67.9022	0.0536233	0.760545	0.946692	-0.462707	0.00447646	0.0135781	0.17717	0.46447	0.939793	0.934772	5.94214e-07	2.22933e-06
gene-LOC115706008	XP_030489362.2	1	probable pectate lyase 18	AT5G04310.2	64.02	Pectin lyase-like superfamily protein		70.8301	89.466	76.5283	105.521	50.2584	0.327652	0.0367784	0.236268	0.549399	0.000100414	0.000472173	0.0990413	0.638265	0.976217	-0.511402	0.00561191	0.0115547
gene-LOC115706010	XP_030489365.1	1	serine/threonine protein phosphatase 2A 57 kDa regulatory subunit B' beta isoform	AT5G03470.1	69.14	Protein phosphatase 2A regulatory B subunit family protein		13.975	11.8254	10.8733	10.799	30.8324	-0.249795	0.204513	0.612973	-0.397629	0.0355296	0.0803289	-0.373215	0.123386	0.624517	1.12608	1.15561e-08	5.29763e-08
gene-LOC115705998	XP_060964182.1	1	protein RNA-directed DNA methylation 3	AT4G08350.1	31.55	global transcription factor group A2		50.7676	52.2792	51.951	49.1938	78.2211	0.0342975	0.802759	0.957163	-0.067219	0.607597	0.726541	0.0224115	0.909983	0.997278	0.607802	0.000360053	0.000924305
gene-LOC115723531	XP_030508886.2	1	casein kinase 1-like protein HD16	AT3G03940.1	85	Protein kinase family protein		0.0763875	0.0344525	0.07055	0	0	0	1	1	0	1	1	0	1	1	0	1	1
gene-LOC115706006	XP_030489360.2	1	protein NUCLEAR FUSION DEFECTIVE 4-like	AT2G39210.1	61.22	Major facilitator superfamily protein		0	0	0	0	0	0	1	1	0	1	1	0	1	1	0	1	1
gene-LOC133029233	XP_060957696.1	1	uncharacterized LOC133029233					0	0	0	0	0	0	1	1	0	1	1	0	1	1	0	1	1
gene-LOC133033980	XP_060965004.1	1	uncharacterized LOC133033980	AT3G05850.1	31.6	MuDR family transposase		0	0	0	0	0	0	1	1	0	1	1	0	1	1	0	1	1
gene-LOC115725250	XP_030510560.2	1	uncharacterized LOC115725250	AT3G24255.5	26.68	RNA-directed DNA polymerase (reverse transcriptase)-related family protein		0	0	0	0	0	0	1	1	0	1	1	0	1	1	0	1	1
gene-LOC115704418	XP_060964180.1	1	protein NUCLEAR FUSION DEFECTIVE 4-like	AT2G39210.1	59.32	Major facilitator superfamily protein		0	0	0	0	0.0167143	0	1	1	0	1	1	0	1	1	0	1	1
gene-LOC115707677	XP_030491569.2	1	protein NUCLEAR FUSION DEFECTIVE 4	AT2G39210.1	69.14	Major facilitator superfamily protein		0.401864	0.180677	0.335282	1.09151	0.388021	0	1	1	1.39471	0.0266585	0.0631186	0	1	1	0	1	1
gene-LOC115697139	XP_030479912.2	1	uncharacterized LOC115697139	AT1G21280.1	31.71	Copia-like polyprotein/retrotransposon		0	0.0183804	0	0	0.0405896	0	1	1	0	1	1	0	1	1	0	1	1
gene-LOC115704094	XP_030487174.2	1	protein NUCLEAR FUSION DEFECTIVE 4	AT2G39210.1	70.92	Major facilitator superfamily protein		0.181586	0.796558	0.468098	4.0944	8.06697	2.08009	0.00792514	0.0830108	4.41685	4.95933e-16	1.08502e-14	0	1	1	5.40545	1.73942e-21	2.02766e-20
gene-LOC115705989	XP_030489339.1	1	DEAD-box ATP-dependent RNA helicase FANCM	AT1G35530.3	51.1	DEAD/DEAH box RNA helicase family protein		4.59553	3.70861	4.78995	2.68073	5.88424	-0.318139	0.132847	0.501365	-0.798194	0.000237692	0.00101939	0.0504855	0.844776	0.995977	0.341774	0.142502	0.20768
gene-LOC115705990	XP_030489343.2	1	protein SEEDLING PLASTID DEVELOPMENT 1	AT3G10420.2	67.01	P-loop containing nucleoside triphosphate hydrolases superfamily protein		3.29578	4.01154	3.17993	3.37721	4.82876	0.277476	0.31884	0.738387	0.0096043	0.973708	0.983738	-0.0658049	0.8623	0.996876	0.536806	0.0860845	0.134125
gene-LOC115705992	XP_030489344.1	1	arabinosyltransferase RRA2	AT1G75110.1	67.05	Nucleotide-diphospho-sugar transferase family protein		2.25261	2.16363	2.33252	5.81343	23.4323	-0.0593772	0.88261	0.977167	1.34436	2.81651e-05	0.000150196	0.0397942	0.929587	0.997607	3.36496	1.308e-35	2.69281e-34
gene-LOC115705993	XP_030489345.2	1	ACT domain-containing protein ACR10	AT2G36840.1	57.21	ACT-like superfamily protein		7.71741	6.05987	5.65649	12.7969	8.53184	-0.3507	0.154082	0.538135	0.701923	0.000891571	0.0033069	-0.45939	0.112916	0.60068	0.124898	0.65016	0.725285
gene-LOC115707414	XP_030491231.2	1	stemmadenine O-acetyltransferase	AT3G26040.1	32.82	HXXXD-type acyl-transferase family protein;start_range=.,9519741		21.3038	23.9193	25.9021	57.4643	41.6776	0.158261	0.376529	0.780968	1.40462	3.45794e-17	8.4103e-16	0.269389	0.243269	0.808998	0.949055	0.000733773	0.00178154
gene-LOC133033996	XP_060965015.1	1	stemmadenine O-acetyltransferase-like	AT3G26040.1	32.09	HXXXD-type acyl-transferase family protein;start_range=.,9519741		7.40219	6.00676	6.99293	9.33812	4.3202	-0.308297	0.292242	0.711076	0.309968	0.23703	0.366533	-0.0912281	0.77324	0.992333	-0.799546	0.0226465	0.0409622
gene-LOC133034004	XP_060965023.1	1	uncharacterized LOC133034004	AT3G09510.1	31.33	Ribonuclease H-like superfamily protein;start_range=.,2921804		0	0	0	0	0	0	1	1	0	1	1	0	1	1	0	1	1
gene-LOC115705985	XP_030489333.2	1	stemmadenine O-acetyltransferase	AT3G26040.1	32.45	HXXXD-type acyl-transferase family protein;start_range=.,9519741		14.6595	13.3605	9.74683	1.74189	18.3575	-0.146174	0.521441	0.862911	-3.11386	2.50594e-29	1.42294e-27	-0.60669	0.472576	0.941081	0.30544	0.263095	0.349366
gene-LOC133034010	XP_060965026.1	1	uncharacterized LOC133034010					0	0	0	0.0240313	0	0	1	1	0	1	1	0	1	1	0	1	1
gene-LOC115705982	XP_030489330.2	1	stemmadenine O-acetyltransferase	AT3G26040.1	31.45	HXXXD-type acyl-transferase family protein;start_range=.,9519741		0.36568	0.639459	0.674084	0.849166	1.13038	0	1	1	1.16571	0.143802	0.248354	0	1	1	1.598	0.0494567	0.082269
gene-LOC115705983	XP_060965040.1	1	stemmadenine O-acetyltransferase	AT3G26040.1	31.1	HXXXD-type acyl-transferase family protein;start_range=.,9519741		9.50005	9.5343	9.75046	13.855	4.31128	-0.0041124	0.988012	0.998217	0.513845	0.0422089	0.0927929	0.0236346	0.943231	0.99768	-1.16027	0.000933311	0.00222389
gene-LOC115705088	XP_030488185.1	1	probable cysteine protease RD19D	AT3G54940.2	72.13	Papain family cysteine protease		3.45613	3.33322	3.16085	10.9265	1.71445	-0.0612933	0.869643	0.974427	1.62846	1.24909e-08	1.17184e-07	-0.138565	0.78524	0.992996	-1.03598	0.0315771	0.055256
gene-LOC115706702	XP_030490276.1	1	uncharacterized LOC115706702	AT3G54880.1	71.05	zinc finger protein		45.2462	53.3983	57.4218	34.6157	100.205	0.234232	0.182322	0.581181	-0.414905	0.0361047	0.0814348	0.334691	0.184295	0.735254	1.13474	5.81114e-09	2.75182e-08
gene-LOC115705957	XP_030489313.1	1	vacuolar protein sorting-associated protein 24 homolog 1	AT5G22950.1	79.48	SNF7 family protein		30.3408	28.8129	28.0785	42.0688	28.4391	-0.0806031	0.66418	0.91995	0.443317	0.00813011	0.0228756	-0.122447	0.607253	0.970504	-0.106779	0.63	0.708537
gene-LOC115705940	XP_030489288.2	1	serine carboxypeptidase-like	AT3G10410.1	67.7	SERINE CARBOXYPEPTIDASE-LIKE 49		46.95	48.9228	44.3333	76.7995	128.524	0.0517604	0.733554	0.939646	0.686094	1.7013e-07	1.3343e-06	-0.0899975	0.662899	0.978814	1.43328	8.01601e-18	7.55351e-17
gene-LOC115705958	XP_030489314.2	1	uncharacterized LOC115705958	AT3G10405.1	62.29	vacuolar acid trehalase		13.7768	15.1183	14.1715	9.13395	9.2758	0.125219	0.471225	0.838139	-0.619268	0.000689781	0.00263838	0.029775	0.896831	0.997212	-0.586211	0.00639338	0.01301
gene-LOC115705956	XP_060964186.1	1	U11/U12 small nuclear ribonucleoprotein 31 kDa protein	AT3G10400.1	61.05	RNA recognition motif and CCHC-type zinc finger domains containing protein		1.02094	0.73815	0.982587	2.0557	0.840177	-0.495121	0.405459	0.799533	0.974011	0.0864095	0.165899	-0.0731261	0.902293	0.997212	-0.303962	0.637598	0.71467
gene-LOC115705955	XP_030489308.2	1	uncharacterized LOC115705955	AT2G39170.1	47.71	MEF2BNB-like protein		9.0988	9.59409	11.4034	14.6398	11.072	0.0708347	0.792981	0.955353	0.656037	0.00684719	0.0196759	0.325227	0.282901	0.837972	0.261679	0.375472	0.468479
gene-LOC115705930	XP_030489269.1	1	protein FLOWERING LOCUS D	AT3G10390.3	70.51	protein FLOWERING locus D-like protein;start_range=.,3229293		10.1258	10.3624	10.3624	11.6262	8.8665	0.0281208	0.875299	0.975515	0.172917	0.2857	0.422131	0.0277647	0.90278	0.997212	-0.212979	0.299272	0.388807
gene-LOC115705926	XP_030489262.2	1	exocyst complex component SEC8	AT3G10380.1	73.06	subunit of exocyst complex 8		25.7424	24.797	24.7538	21.2877	14.7099	-0.0364811	0.805462	0.957572	-0.227684	0.0968238	0.182083	-0.0577677	0.77715	0.992834	-0.82468	2.04869e-05	6.33708e-05
gene-LOC115705929	XP_060964188.1	1	kinesin-like protein KIN-UC	AT3G54870.2	62.85	Armadillo/beta-catenin repeat family protein / kinesin motor family protein;start_range=.,20330806		4.76945	7.17516	8.08986	12.8727	4.27707	0.584853	0.0109493	0.10453	1.41153	4.62133e-15	9.35211e-14	0.755954	0.0100474	0.142954	-0.170088	0.506314	0.596453
gene-LOC115705943	XP_030489292.2	1	putative ribosomal large subunit pseudouridine synthase SVR1, chloroplastic	AT2G39140.1	65.66	pseudouridine synthase family protein		34.4869	38.5195	36.3012	22.9252	21.5796	0.153195	0.417047	0.806837	-0.61086	0.000543546	0.00213195	0.0649941	0.784883	0.992996	-0.687193	0.0023286	0.0051615
gene-LOC115705936	XP_030489284.1	1	glycerol-3-phosphate dehydrogenase SDP6, mitochondrial	AT3G10370.1	82.34	FAD-dependent oxidoreductase family protein		10.7908	13.455	12.3606	14.0355	10.8842	0.308958	0.120302	0.476299	0.35421	0.0550086	0.11521	0.183235	0.466327	0.940229	-0.0039668	0.986165	0.989638
gene-LOC115705939	XP_030489286.1	1	vacuolar protein-sorting-associated protein 33 homolog	AT3G54860.1	75.21	Sec1/munc18-like (SM) proteins superfamily		18.4647	17.9154	17.8223	24.582	14.2677	-0.0513842	0.762888	0.947288	0.388854	0.0120053	0.0320549	-0.0622875	0.776789	0.992834	-0.386115	0.0580102	0.0947499
gene-LOC115705937	XP_030489285.2	1	U-box domain-containing protein 14	AT3G54850.1	66.83	plant U-box 14		5.41946	3.95701	3.92676	7.42529	6.54028	-0.461572	0.076815	0.37035	0.428281	0.0564208	0.117625	-0.472274	0.109448	0.594091	0.256142	0.339078	0.430855
gene-LOC115705959	XP_030489315.1	1	ras-related protein RABF1	AT3G54840.1	87.88	Ras-related small GTP-binding family protein		43.2421	41.7831	45.1472	44.6242	127.329	-0.0573051	0.740032	0.941602	0.0154069	0.922505	0.95355	0.0502834	0.819614	0.995721	1.54359	4.30236e-18	4.12145e-17
gene-LOC115705954	XP_030489307.2	1	probable protein S-acyltransferase 15	AT5G04270.1	60.89	DHHC-type zinc finger family protein		5.99331	7.04772	6.24653	7.59123	78.0992	0.233223	0.407391	0.800895	0.323475	0.244965	0.375774	0.0538276	0.869582	0.996876	3.69645	2.02946e-62	9.04041e-61
gene-LOC133034044	XP_060965049.1	1	uncharacterized LOC133034044					0	0	0	0	0	0	1	1	0	1	1	0	1	1	0	1	1
gene-LOC115705965	XP_030489325.2	1	uncharacterized LOC115705965	AT2G36985.1	69.44	DVL family protein		1.38213	1.06588	1.26618	1.86523	9.99412	0	1	1	0.409822	0.61236	0.730364	0	1	1	2.86336	2.66917e-07	1.04782e-06
[truncated: 33,527 more rows]

## Sheet: Table S2
Enrichment biological processes analysis: up-regulated genes - F3>V
Average F3>=1
logFC(F3/V2)>=1
pval<0.05
Total raw number of genes - 1672
At least 40% identity to Arabidopsis genes, based on TAIR annotations
Total number of genes after filrer - 908
[truncated: 180 more rows]

## Sheet: Table S3
Enrichment biological processes analysis: up-regulated genes - IM3>V
[truncated: 214 more rows]

[truncated: 1 more sheets: Table S4]
